# Supplementary material for: A phase transition enhances the catalytic activity of SARM1, an NAD+ glycohydrolase involved in neurodegeneration
Source: eLife journal article supplement (doi:10.7554/elife.66694), 2021-06-29
Supplement: supp [file elife-66694-supp-v1.zip]

Archive with 13 entries (13 files):
- elife_poa_e66694_Transparent_Reporting_File.pdf
- elife_poa_e66694_Figure_2_figure_supplement_1.tif
- elife_poa_e66694_Figure_2_figure_supplement_2.tif
- elife_poa_e66694_Figure_3_figure_supplement_1.tif
- elife_poa_e66694_Figure_3_figure_supplement_2.tif
- elife_poa_e66694_Figure_5_figure_supplement_1.tif
- elife_poa_e66694_Figure_5_figure_supplement_2.tif
- elife_poa_e66694_Figure_5_figure_supplement_3.tif
- elife_poa_e66694_Figure_5_figure_supplement_4.tif
- elife_poa_e66694_Figure_6_figure_supplement_1.tif
- elife_poa_e66694_Figure_6_figure_supplement_2.tif
- elife_poa_e66694_Source_data_1.xlsx
- elife_poa_e66694_Supplementary_file_1.docx
