# Supplementary material for: A phase transition enhances the catalytic activity of SARM1, an NAD+ glycohydrolase involved in neurodegeneration
Source: eLife journal article supplement (doi:10.7554/elife.66694), 2021-06-29
Supplement: supp [file elife-66694-supp-v1.zip › elife_poa_e66694_Source_data_1.xlsx]

## Sheet: Figure 2
Figure 2A								Figure 2B				Figure 2C
	Mean	Standard Deviation							Mean	Standard Deviation		[SARMTIR] (µM)	Mean	Standard Deviation
Crude Lysate	0.067	0.001						Crude Lysate	0.067	0.001		35	0.18795	0.00586899
Clarified Lysate	0.0505	0.002						Purified	0.0018	0.0003		30	0.10625	7.07107e-05
Purified	0.0018	0.0003						Purified + Lysate	0	0		25	0.0699	0.0142836
												20	0.02595	0.00388909
												20	0.01755	0.00162635
												15	0.008	0.000141421
												10	0.0024	0.000141421
												5	0.00025	0.000353553
Figure 2D								Figure 2E				Figure 2F
Sample									Log Increase			Time (s)	15	30	45	60	75	90	105	120	135	150	165	180	195	210	225	240	255	270	285	300	315	330	345	360	375	390	405	420	435	450	465	480	495	510	525	540	555
Frictional								No Additive	0			No PEG	0	2.49796	1.73585	1.06731	1.37615	1.338	1.24989	2.20547	1.96566	2.9167	1.92206	1.52784	2.4053	1.14452	1.80761	2.15278	2.11918	1.73585	2.78863	3.32819	2.23726	3.10473	2.78136	2.91216	2.75956	3.21828	2.72504	4.05396	2.54428	2.81769	3.15923	3.70243	2.37805	2.00291	3.18739	2.84404	3.09565
ratio								PEG 8000	3.15856			PEG	0	114.334	211.441	308.855	414.276	509.262	589.199	673.176	751.197	833.376	914.278	996.523	1075.42	1146.16	1214.94	1276.79	1336.14	1385.98	1439.62	1491.28	1538.18	1579.11	1619.8	1651.38	1677.71	1707.37	1731.94	1757.53	1780.56	1805.62	1834.11	1847.5	1862.02	1882.68	1902.62	1914.59	1933.49
(f/f0)								PEG 3350	3.30035
Peak 1 (major) Peak 1 (minor)								PEG 1500	3.26635
S-value/ MW (Da) S-value/ MW (Da)								PEG 400	2.33221
SARM1 OD280nm =1.0 1.574 1.9S/26,441 4.2S/88,293								Dextran	1.14437
SARM1 OD280nm =0.3 1.509 1.9S/24,547 3.9S/71,421								Sucrose	0.402829
								Glycerol	0.59587
Figure 2G	Fold Increase from 0% PEG							Figure 2H				Figure 2I
	PEG 8000	PEG 3350	PEG 1500	PEG 400	Dextran	Glycerol			Relative Viscosity	Activity Fold Increase			No Additive	PEG 8000	PEG 3350	PEG 1500	PEG 400	Dextran	Sucrose	Glycerol
0 %	1	1	1	1	1	1		Sucrose	1.66	2.0283		Fold Increase	1	12.8	6.434	3.733	2.26	6.233	1.66	1.8
10 %	110.132	163.698	31.8868	0.773585	0.962264	0.396226		Glycerol	1.8	2.16981
20 %	1299.15	1519.89	1039.04	8.90566	11.283	2.16981		Dextran	6.233	11.283
30 %	1440.66	1996.87	1846.49	214.887	13.9434	3.9434		PEG 400	2.26	8.90566
								PEG 1500	3.733	1039.04
								PEG 3350	6.434	1519.89
								PEG 8000	12.8	1299.15
Figure 2J								Figure 2K				Figure 2L
[SARMTIR] (µM)	No PEG 3350		25% PEG 3350					[Zn] uM	Percent Activity	Percent deviation		ENAD (µM)	0 µM Zn	1 µM Zn	2.5 µM Zn
35	0.18795	0.00586899						0	100	2.74357		0.001	1.53965	3.01386	5.29101
30	0.10625	7.07107e-05						12.5	53.8849	7.2337		0.00133333	1.69736	2.75786	6.13497
25	0.0699	0.0142836						25	28.1089	2.07182		0.002	1.96069	3.61664	7.8125
20	0.02595	0.00388909	6.0639	0.193889				50	4.00822	0.0141421		0.004	2.79057	5.54324	12.3001
20	0.01755	0.00162635						100	1.56218	0		0.008	6.12557	8.02568	17.5901
15	0.008	0.000141421						200	0.637205	0		0.0162602	11.383	16.6113	37.4532
10	0.0024	0.000141421						500	0.596095	0
5	0.00025	0.000353553
10			3.35885	0.243033
5			1.93065	0.289702
2.5			0.58755	0.160725
1			0.08825	0.0939745
0.75			0.095	0.0472347
0.5			0.11425	0.0413657
0.3			0.16515	0.0180312
Figure 2M								Figure 2N
[Berberine Chloride] (uM)	Percent Activity	Percent Deviation						[ENAD] (µM)	0 µM Berberine	50 µM Berberine	100 µM Berberine	200 µM Berberine
0	100	0						0.0005	1.77085	2.37135	2.35516	5.69152
12.5	129.563	22.3386						0.001	2.14707	2.92269	4.52284	7.75494
25	61.6245	18.5127						0.00133333	2.96692	3.69413	3.59324	9.90099
50	86.5197	2.29893						0.002	2.88101	4.39754	4.96401	10.8814
100	55.9613	15.2357						0.004	4.33557	5.87544	8.10701	15.8228
200	21.1593	2.9754						0.008	5.77034	9.04977	15.0716	29.4118
350	13.2917	4.46585						0.0163265	10.015	24.4798	33.7838	71.9424
500	9.10498	2.62679
[truncated: 15 more columns]

## Sheet: Figure 3
Figure 3A															Figure 3H
	Pre-Centrifugation		Supernatant		Pellet										Control	Citrate
No PEG	0.02175	0.000281421	0.019	0.00162635	0	0									67.5684	111.514
PEG	8.03325	1.06752	0.24505	0.111652	6.06855	0.570989									97.4169	111.514
															63.3616	104.858
															64.9636	129.96
Figure 3B					Figure 3D				Figure 3E						49.8436	100.4
5 µM	Pre-centrifugation	Supernatant	Pellet		Heaxanediol (%_	Mean	Standard deviation			PEG 3350		Sodium Citrate			36.8449	152.029
0%	0	0	0		0	0.00605	0.000353553			Mean	Standard deviation	Mean	Standard deviation		58.5225	123.432
10%	0.11385	0.188	0.176		1	0.00415	0.000212132		No 1,6–Hexanediol	0.949	0.0851357	0.5847	0.0442649		48.5809	149.573
17.5%	1.65365	0.09005	0.5612		2	0	0		2% 1,6–Hexanediol	0.81405	0.0758726	0.35305	0.0490025		39.1876	235.316
25%	2.56	0.04965	1.474												44.3556	186.05
															52.4176	111.936
10 µM	Pre-centrifugation	Supernatant	Pellet												48.7204	136.189
0%	0.0014	0.0012	0												44.89	144
10%	1.2651	0.5014	0.4078												67.5684	216.678
17.5%	4.1032	0.167	2.725												91.0116	114.276
25%	4.55145	0.12865	3.2164												67.5684	225.3
															54.1696	158.256
20 µM	Pre-centrifugation	Supernatant	Pellet												54.6121	211.412
0%	0.02175	0.019	0												54.6121	158.256
10%	5.7092	1.72695	2.87745												28.09	176.358
17.5%	7.10785	0.38745	5.67585												58.9824	241.181
25%	8.03325	0.24505	6.06855												52.4176	170.564
															68.5584	222.308
															38.9376	130.416
															31.2481	134.56
Figure 3I															61.6225	111.514
															110.04	154.754
pH	Log kcat (s-1)	Precipitation (%)		pH	Log Km (µM)	Precipitation (%)		pH	Log kcat/Km (M^-1s^-1)	Precipitation (%)					107.744	179.024
4	-1.89908	93.231		4	3.35793	93.231		4	0.742987	93.231					71.2336	144
4.5		82.3812		4.5		82.3812		4.5		82.3812					71.2336	190.164
5	-1.41757	82.3943		5	3.33686	82.3943		5	1.24557	82.3943					69.0561	126.562
5.5	-1.26154	76.5307		5.5	2.82347	76.5307		5.5	1.91499	76.5307					69.0561	124.992
6	-0.724919	74.8239		6	3.11294	74.8239		6	2.16214	74.8239					39.1876	111.936
6.5	-0.420354	72.4266		6.5	3.04532	72.4266		6.5	2.53432	72.4266					79.21	233.478
7	-0.356153	73.7161		7	3.12548	73.7161		7	2.51837	73.7161					32.6041	176.624
7.5	-0.401341	80.3904		7.5	3.22968	80.3904		7.5	2.36898	80.3904					74.3044	259.21
8	-0.964971	82.887		8	2.82158	82.887		8	2.21345	82.887					43.8244	204.49
8.5		86.0084		8.5		86.0084		8.5		86.0084					67.4041	228.312
9	-2.04886	88.5123		9	3.25551	88.5123		9	0.695629	88.5123					63.8401	176.358
															70.3921	137.358
															65.1249	214.916
															93.3156	256.961
															79.21	268.96
															74.3044	118.157
															64.3204	211.702
															79.21	106.916
															50.9796	186.05
															56.25	122.324
															79.21	245.862
															78.3225	250.906
															82.4464	169.781
															67.7329	216.678
															69.8896	165.123
															73.2736	235.316
															78.1456	159.517
															78.1456	222.606
															62.5681	191.822
															97.0225	280.228
															53.8756	233.478
															104.448	159.264
															88.36	274.896
															70.7281	153.264
															56.1001	171.872
															55.2049	112.36
															45.6976	222.606
															72.9316	270.932
															104.04	114.276
															65.9344	165.123
															79.7449	146.168
															49.9849	162.053
															73.2736	214.916
															43.56	228.614
															56.1001	119.028
															58.6756	264.388
															67.7329	119.684
															74.1321	238.085
															115.562	190.992
															73.6164	132.25
															71.4025	207.648
															87.0489	191.822
															71.4025	119.684
															50.9796	111.725
															54.4644	140.186
															89.3025	214.916
															98.01	171.872
															101.002	181.172
															108.994	190.992
															32.2624	148.84
															56.7009	175.033
															64.4809	262.44
															62.7264	233.478
															42.25	108.368
															46.24	105.678
															55.8009	111.725
															71.4025	79.9236
															64.9636	111.725
															34.81	183.061
															63.2025	105.678
															59.29	127.464
															62.7264	89.8704

## Sheet: Figure 4
Figure 4A																Figure 4F
	Km (µM)	kcat (s-1)	kcat/Km (M-1s-1)													[ENAD] (µM)	500 nM + PEG 3350		1 µM + PEG 3350		2.5 µM + 25% PEG 3350		5 µM + PEG 3350		10 µM + PEG 3350		10 µM no PEG 3350		20 µM no PEG 3350
Log Fold Change +/- PEG	-0.545816	3.3674	3.91322														Mean	Standard Deviation	Mean	Standard Deviation	Mean	Standard Deviation	Mean	Standard Deviation	Mean	Standard Deviation	Mean	Standard Deviation	Mean	Standard Deviation
																2000	0.0648	0.0151321	0.12165	0.0122329	1.1271	0.0424264	2.58535	0.32534	6.2398	0.0736805	0.00195	0.000371736	0.028	0
																1000	0.05115	0.0126572	0.12035	0.017607	1.0163	0.103945	2.62875	0.00799031	5.9048	0.0999849	0.0014	0	0.02315	0.00106066
																750	0.0355	0.00919239	0.10065	0.0198697	0.98345	0.0289207	2.4814	0.0639225	5.5945	0.406869	0.00115	7.07107e-05	0.0187	0.0019799
Figure 4B	0% PEG		10% PEG		12.5% PEG		15% PEG		17.5% PEG		20% PEG		25% PEG			500	0.0249	0.000141421	0.0655	0.0155563	0.9192	0.0424264	2.0148	0.0451134	4.38685	0.00813173	0.0007	0.000424264	0.0124	0.00113137
[ENAD] (uM)	Mean	Standard Deviation	Mean	Standard Deviation	Mean	Standard Deviation			Mean	Standard Deviation	Mean	Standard Deviation	Mean	Standard Deviation		250	0.01525	0.00247487	0.0333	0.00424264	0.68155	0.0118087	1.2924	0.0468105	2.6602	0.181161	0.0005	0	0.00685	0.00190919
2000	0.00195	0.000371736	1.3761	0.0125865	2.61275	0.0985	3.53685	0.0215668	4.43575	0.293237	4.60015	0.311481	6.2398	0.0736805		125	0.0103	0.000282843	0.01745	0.000777817	0.4315	0.0127279	0.65025	0.0333047	1.18925	0.0610233	0.0003	0.000141421	0.0046	0.000565685
1000	0.0014	0	1.34675	0.144038	2.6733	0.0653367	3.3522	0.322724	4.63135	0.154503	4.56135	0.383747	6.14535	0.0144957		61.25	0.0054	0.00311127	0.0142	0.0019799	0.2348	0.0248902	0.3221	0.0343654	0.46035	0.137391	4e-05	5.65685e-05	0.00185	7.07107e-05
750	0.00115	7.07107e-05											5.90495	0.413162		0	0	0	0	0	0	0	0	0	0	0	0	0	0	0
500	0.0007	0.000424264	0.89075	0.0258801	1.6236	0.0488611	2.84755	0.184626	3.25335	0.0321734	3.5204	0.131451	4.38685	0.00813173
250	0.0005	0	0.469	0.00445477	0.9108	0.0947523	1.70175	0.209657	2.01	0.425537	2.2444	0.0995606	2.6602	0.181161
125	0.0003	0.000141421	0.23875	0.0401637	0.4933	0.0123744	0.83375	0.076014	1.15405	0.264953	1.20405	0.0504874	1.18925	0.0610233		Figure 4G
62.25	4e-05	5.65685e-05	0.1207	0	0.3112	0.0253144	0.4518	0.134209	0.4743	0.0789131	0.616	0	0.46035	0.137391		[ENAD] (µM)	500 nM + PEG 3350		1 µM + PEG 3350		10 µM no PEG 3350		20 µM no PEG 3350
0	0	0	0	0	0	0	0	0	0	0	0	0	0	0			Mean	Standard Deviation	Mean	Standard Deviation	Mean	Standard Deviation	Mean	Standard Deviation
Figure 4C																2000	0.0648	0.0151321	0.12165	0.0122329	0.00195	0.000371736	0.028	0
PEG (%)	Km															1000	0.05115	0.0126572	0.12035	0.017607	0.0014	0	0.02315	0.00106066
0	1745															750	0.0355	0.00919239	0.10065	0.0198697	0.00115	7.07107e-05	0.0187	0.0019799
10	652.5															500	0.0249	0.000141421	0.0655	0.0155563	0.0007	0.000424264	0.0124	0.00113137
12.5	635.7															250	0.01525	0.00247487	0.0333	0.00424264	0.0005	0	0.00685	0.00190919
15	388															125	0.0103	0.000282843	0.01745	0.000777817	0.0003	0.000141421	0.0046	0.000565685
17.5	437.6															61.25	0.0054	0.00311127	0.0142	0.0019799	4e-05	5.65685e-05	0.00185	7.07107e-05
20	386.8															0	0	0	0	0	0	0	0	0
25	497.9
																Figure 4H
Figure 4D																[SARMTIR] (µM)	Km	No PEG 3350
PEG (%)	kcat (s^-1)															0.5	1642
0	0.000369															1	798.2
10	0.1961															2.5	227.5
12.5	0.3734															5	378.6
15	0.4472															10	501.4	1743
17.5	0.5885															20		1177
20	0.586
25	0.86
																Figure 4I
Figure 4E																[SARMTIR] (µM)	PEG 3350	No PEG 3350
PEG (%)	kcat/Km															0.5	0.241
0	0.211461															1	0.1864
10	300.536															2.5	0.5096
12.5	587.384															5	0.679
15	1152.58															10	0.8594	0.0003688
17.5	1344.84															20		0.0023
20	1514.99
25	1727.25															Figure 4J
																[SARMTIR] (µM)	PEG 3350	No PEG 3350
																0.5	146.772
																1	233.525
																2.5	2240
																5	1793.45
																10	1714	0.211589
																20		1.95412

## Sheet: Figure 5
Figure 5A									Figure 5B										Figure 5F	Mean	Standard Deviation	N	Mean	Standard Deviation	N	Mean	Standard Deviation	N	Mean	Standard Deviation	N	Mean	Standard Deviation	N	Mean	Standard Deviation	N	Mean	Standard Deviation	N	Mean	Standard Deviation	N	Mean	Standard Deviation	N	Mean	Standard Deviation	N
	0 min	5 min	15 min	30 min	60 min	90 min	120 min		Time (min)	ADPR		cADPR		Nicotinamide		NAD+				WT			Y568A			G601P			D594A			D627A			K628A			C629A			C635A			C635S			W638A
0.0002	-0.00514835	0.00497699	-0.0016652	-0.00602007	0.00631064	0.0110641	0.0107735			Mean	Standard Deviation	Mean	Standard Deviation	Mean	Standard Deviation	Mean	Standard Deviation		Km	378.6	100	2	1995	100	2	1776	100	2	786.9	100	2	550.5	100	2	1794	100	2	430.8	100	2	667	100	2	621.6	100	2	2163	100	2
0.000616667	-0.0038743	0.00781566	-0.000882894	-0.00391155	0.00724196	0.0095591	0.0119954		0	0	0	0	0	0	0	368	0			WT			Y568A			D594A			G601P			D627A			K628A			C629A			C635A			C635S			W638A
0.00103333	-0.00211597	0.0120848	-0.000312924	-0.00178814	0.0077486	0.00931323	0.0125393		5	111.5	21.3546	15.2	19.799	14.75	16.0513	157.15	57.912		kcat	0.679	0.04	2	0.004072	0.0001	2	0.003098	0.0004	2	0.005426	0.0004	2	0.0017598	0.001	2	0.00581	0.0004	2	0.005052	0.001	2	0.006126	0.001	2	0.003578	0.001	2	0.005946	0.001	2
0.00145	-0.000327826	0.016205	-9.49949e-05	0.000119209	0.0083819	0.0102073	0.0127032		15	153.938	5.88666	9.8375	0.618718	40.525	6.54074	104.025	13.8946			WT			Y568A			D594A			G601P			D627A			K628A			C629A			C629S			C635A			C635S
0.00186667	0.00105798	0.0189543	0.00035204	0.00184029	0.0090301	0.0115931	0.0136495		30	176.25	6.43467	11.15	0.212132	49.55	2.05061	60.6	10.4652		kcat/Km	1793.45	200	2	1.79068	0	2	3.93697	1	2	5.61209	3.61602	4	3.19673	1	2	4.64829	1.99364	4	11.727	1	2	12.445	1.73	2	9.18441	1	2	7.06955	1.85749	2
0.00228333	0.00211597	0.0196621	0.00117347	0.00336021	0.00973791	0.0134036	0.0152215		60	205.25	13.6472	12.5	0.565685	59.95	4.87904	24	25.4558
0.0027	0.00286102	0.0189245	0.00220724	0.00442564	0.0108331	0.0157505	0.0169501		90	195	3.66779	13.2	1.29001	57.6	2.1654	28.5	3.24399
0.00311667	0.00334531	0.0174493	0.00317395	0.00499189	0.0122413	0.0188723	0.0182614		120	252.1	5.67185	15.6	2.11232	70.2	3.44567	0	2.98858
0.00353333	0.00407547	0.0156686	0.00380538	0.00541657	0.0136271	0.0219941	0.0192001
0.00395	0.00531226	0.0140592	0.00426918	0.00540912	0.0145584	0.0242069	0.0203848		Figure 5C	No PEG		PEG		Sodium Citrate					Figure 5G
0.00436667	0.00687689	0.0132695	0.00433624	0.00516325	0.0150949	0.0251904	0.021629			Mean	Standard Deviation	Mean	Standard Deviation	Mean	Standard Deviation				WT			D594A			Y568A			G601P			D627A			K628A			C629A			C629S			C635A			C635S			W638A
0.00478333	0.00817329	0.0135675	0.00400096	0.0051707	0.0147223	0.0254959	0.0227839		5			15.7794	0.876003						Precipitation % Relative to WT	Standard Deviation	N	Precipitation % Relative to WT	Standard Deviation	N	Precipitation % Relative to WT	Standard Deviation	N	Precipitation % Relative to WT	Standard Deviation	N	Precipitation % Relative to WT	Standard Deviation	N	Precipitation % Relative to WT	Standard Deviation	N	Precipitation % Relative to WT	Standard Deviation	N	Precipitation % Relative to WT	Standard Deviation	N	Precipitation % Relative to WT	Standard Deviation	N	Precipitation % Relative to WT	Standard Deviation	N	Precipitation % Relative to WT
0.0052	0.00877678	0.0147671	0.003336	0.00542402	0.0134483	0.02563	0.0234768		10					25.9423	5.31781				100	0	2	89.7881	4.00293	2	45.0958	6.93557	2	56.034	1.52327	2	100	0	2	98.7364	1.78702	2	100	0	2	100	0	2	97.9231	2.93717	2	100	0	2	82.9333
0.00561667	0.00876188	0.0169948	0.00276044	0.00538677	0.0125393	0.0255629	0.0237525		15	9.37377	0.473138	15.6979	1.58569
0.00603333	0.00825524	0.019908	0.00249222	0.00521541	0.0120923	0.0259131	0.0239685		30			15.8045	0.276414
0.00645	0.00728667	0.0223294	0.00241958	0.00557303	0.0117123	0.0273511	0.023216		35					24.4248	0.418293
0.00686667	0.00619143	0.0232682	0.00233017	0.00590831	0.0110269	0.0296161	0.0215098		45	10.4301	4.38972
0.00728333	0.00524521	0.0230968	0.00224076	0.00551343	0.0107065	0.031583	0.019446		60			16.4616	1.83674	23.6369	7.74682
0.0077	0.0051707	0.0222549	0.0027325	0.00470877	0.0111461	0.0323728	0.0174865		90	10.8622	3.20871	14.7727	1
0.00811667	0.00628084	0.0205263	0.00365451	0.00458956	0.0111088	0.0324026	0.015758		120	11.4342	3.25783	16.1603	1	25.939	7.78831
0.00853333	0.00813603	0.0178516	0.00462122	0.0044778	0.0101104	0.0319257	0.0141561		Figure 5D
0.00895	0.0101849	0.0154302	0.00529736	0.00321865	0.00863522	0.0313371	0.0138506		No Additive			PEG			Sodium Citrate
0.00936667	0.011906	0.0143945	0.00556558	0.00138581	0.0077188	0.0311807	0.014931		Mean	Standard Deviation	N	Mean	Standard Deviation	N	Mean	Standard Deviation	N
0.00978333	0.0136495	0.0142679	0.00566058	0.000648201	0.00807643	0.0313148	0.0166669		10.5251	2.53411	8	15.8576	1.07032	8	23.2376	2.90517	7
0.0102	0.0154674	0.0145733	0.00543147	0.00161678	0.00928342	0.0315607	0.018701
0.0106167	0.016816	0.0153109	0.00517443	0.00295788	0.0106469	0.0314116	0.020884
0.0110333	0.0171587	0.0166819	0.00539236	0.0045225	0.0121817	0.0308678	0.0231042
0.01145	0.0167862	0.0176802	0.00587292	0.00665337	0.014022	0.0297055	0.0245124
0.0118667	0.0169054	0.0172853	0.0064373	0.00894815	0.0156611	0.0281483	0.0250638
0.0122833	0.0176355	0.0162274	0.00677817	0.0102594	0.0160486	0.0271574	0.0253096
0.0127	0.0179112	0.0153407	0.0072699	0.0102967	0.0151396	0.0267476	0.024952
0.0131167	0.0170618	0.0146702	0.00792369	0.0101253	0.0140443	0.0262186	0.0238121
0.0135333	0.0157654	0.0142902	0.00834838	0.00967085	0.0132397	0.0252649	0.022538
0.01395	0.0145882	0.0150576	0.00868924	0.00871718	0.0127628	0.0245422	0.0217259
0.0143667	0.0132993	0.017494	0.00879541	0.00742823	0.0125766	0.024505	0.0214428
0.0147833	0.0118986	0.0204667	0.00853278	0.00687689	0.0126138	0.0248253	0.0207424
0.0152	0.010848	0.0226349	0.00747107	0.00751018	0.0130013	0.0250414	0.0193939
0.0156167	0.0105128	0.0239834	0.00606291	0.00845641	0.0133216	0.0250041	0.0183806
0.0160333	0.0109076	0.0248402	0.00510737	0.00920892	0.0133738	0.0243932	0.0183433
0.01645	0.0118464	0.0248551	0.00448152	0.0100061	0.0129417	0.0231788	0.0196472
0.0168667	0.0126585	0.0238195	0.00407361	0.0110045	0.0120327	0.0217706	0.0214577
0.0172833	0.0126585	0.022538	0.00395626	0.011228	0.0109598	0.020504	0.023298
0.0177	0.0120923	0.0220761	0.00424124	0.00975281	0.00985712	0.0200495	0.0252724
0.0181167	0.0117421	0.0224486	0.00431947	0.00763684	0.00934303	0.0206232	0.026688
0.0185333	0.01169	0.0229999	0.00376068	0.00660866	0.00968576	0.0224188	0.0266135
0.01895	0.0113025	0.0237375	0.00320747	0.00692159	0.0105947	0.0246987	0.0243485
0.0193667	0.0102669	0.0244603	0.00326335	0.00790507	0.0114962	0.0262335	0.0207424
0.0197833	0.00878423	0.0245422	0.00399537	0.00899285	0.0120923	0.0266954	0.0172481
0.0202	0.00713021	0.0239462	0.00483915	0.010334	0.012137	0.0256971	0.0147671
0.0206167	0.00529736	0.0228807	0.00567175	0.0116155	0.0114664	0.0239238	0.0133514
0.0210333	0.00333786	0.0215024	0.00624172	0.0122339	0.0103563	0.0224561	0.0127107
0.02145	0.00233948	0.0198707	0.00630878	0.0120923	0.00948459	0.0220612	0.0127107
0.0218667	0.003241	0.0187978	0.00596791	0.0113174	0.00935048	0.0229552	0.0131279
0.0222833	0.00592321	0.0192896	0.00528619	0.00997633	0.00987202	0.0242218	0.0143573
0.0227	0.00920892	0.0207275	0.0048168	0.00844151	0.0107139	0.0255033	0.0163838
0.0231167	0.012055	0.0222921	0.00471063	0.00749528	0.0118762	0.0267103	0.0191331
0.0235333	0.0140145	0.0233576	0.00512414	0.00765175	0.0132173	0.0273213	0.0219494
0.02395	0.0145659	0.0240058	0.00574999	0.00873953	0.0143126	0.0267774	0.0241846
0.0243667	0.014171	0.0245199	0.00601821	0.0102222	0.0148565	0.0249073	0.0258535
0.0247833	0.0134707	0.0251308	0.00612438	0.0115633	0.0146329	0.0225157	0.0264049
0.0252	0.0128895	0.0260472	0.00630319	0.0123456	0.0142381	0.0209883	0.0260025
0.0256167	0.0122115	0.0265762	0.00675581	0.0123456	0.014022	0.0201762	0.0245646
0.0260333	0.0113994	0.0265464	0.00730902	0.0118613	0.0142381	0.0193343	0.0224486
0.02645	0.0107437	0.0259355	0.007594	0.0111088	0.0148341	0.0183582	0.0205785
0.0268667	0.00983477	0.0248179	0.00739284	0.00988692	0.0153705	0.0180677	0.0195727
0.0272833	0.00820309	0.0229254	0.00672787	0.0089258	0.0158101	0.0193045	0.0196025
0.0277	0.00616908	0.0204295	0.00578351	0.00866502	0.0159964	0.0213012	0.0197366
0.0281167	0.00455976	0.0182986	0.00472739	0.00882894	0.0162274	0.0231788	0.0201613
0.0285333	0.00396371	0.0170767	0.00340305	0.00853836	0.0161454	0.0248551	0.021711
0.02895	0.00414997	0.0166297	0.00178255	0.00772625	0.0157058	0.0264868	0.024274
0.0293667	0.00485778	0.0162348	0.000614673	0.00745058	0.0156388	0.0279024	0.02639
0.0297833	0.00644475	0.0156835	7.26432e-05	0.0076592	0.0164136	0.028573	0.0270903
0.0302	0.0083819	0.0151396	0.000363216	0.00775605	0.0176355	0.0279322	0.0271425
0.0306167	0.0102818	0.0149161	0.00124052	0.00736117	0.0181571	0.0264272	0.0269711
0.0310333	0.0117645	0.0151917	0.00252016	0.00676513	0.0179633	0.0242814	0.0262186
0.03145	0.0126958	0.0156388	0.00428036	0.00613183	0.017561	0.0220388	0.0246689
0.0318667	0.0123978	0.0160858	0.00569411	0.00575185	0.0169575	0.0201464	0.0231415
0.0322833	0.0103116	0.0163019	0.00624731	0.00647455	0.0161529	0.0183508	0.0229403
0.0327	0.00785291	0.0161007	0.00558793	0.00847876	0.0156611	0.0168607	0.0240356
0.0331167	0.00653416	0.0157356	0.00417419	0.0105798	0.0158697	0.0159964	0.0251159
0.0335333	0.00654161	0.0159889	0.00265427	0.0118166	0.0164658	0.0165552	0.0253245
0.03395	0.00680238	0.017181	0.00115112	0.0125468	0.0169426	0.0178814	0.0251979
0.0343667	0.00700355	0.0186563	-5.02914e-05	0.013344	0.0172034	0.0189394	0.026077
0.0347833	0.00791252	0.0196919	-0.000564381	0.0135377	0.0174493	0.0199229	0.0275597
0.0352	0.00927597	0.0207052	6.70552e-05	0.0124946	0.0174865	0.0219047	0.028491
0.0356167	0.010103	0.0215322	0.00127964	0.0110492	0.0172108	0.0247806	0.0294149
0.0360333	0.00996888	0.021182	0.00219606	0.0101998	0.0169724	0.0271648	0.0310987
0.03645	0.00950694	0.0194758	0.00258721	0.00981987	0.0172779	0.0285581	0.0328571
0.0368667	0.009574	0.0174716	0.00309013	0.00905991	0.0179633	0.0294372	0.0329986
0.0372833	0.00958145	0.0164732	0.00398979	0.00785291	0.0185892	0.029847	0.0312701
0.0377	0.00894815	0.0161231	0.00450946	0.00692904	0.0192598	0.0291914	0.0287816
0.0381167	0.00777841	0.015825	0.00443682	0.0063479	0.0201613	0.0271276	0.0258982
0.0385333	0.0064522	0.0156611	0.00411272	0.00575185	0.0208914	0.0243261	0.0226796
0.03895	0.00592321	0.0162274	0.00415742	0.00513345	0.0206307	0.0222325	0.0195205
0.0393667	0.00619888	0.017494	0.00467151	0.00508875	0.0196621	0.0216812	0.0168532
0.0397833	0.00709295	0.0190288	0.00515208	0.00552088	0.0183806	0.022687	0.0149384
0.0402	0.00865758	0.0204965	0.0055097	0.0057444	0.0172257	0.0240207	0.0138655
0.0406167	0.0108257	0.0221953	0.00587851	0.00593066	0.0171289	0.0249967	0.0138804
0.0410333	0.0132471	0.023976	0.00674464	0.00644475	0.018701	0.0255257	0.0148565
0.04145	0.0147149	0.0250936	0.00761077	0.00728667	0.0211895	0.0252724	0.0161976
0.0418667	0.0148863	0.0252724	0.00734255	0.007689	0.0230744	0.024423	0.0178441
0.0422833	0.0142008	0.024505	0.0061579	0.00756234	0.024274	0.0234023	0.0195727
0.0427	0.0127107	0.0237599	0.00485033	0.00761449	0.0252649	0.0231117	0.0208765
0.0431167	0.0105202	0.023298	0.00367686	0.00801682	0.0255406	0.0239313	0.0215098
0.0435333	0.0082776	0.023514	0.00228547	0.00852346	0.0244379	0.0258312	0.0218526
0.04395	0.00676513	0.0243187	0.00103377	0.00854582	0.0227913	0.0279471	0.022769
0.0443667	0.00649691	0.0252873	0.000754371	0.00815839	0.0215024	0.0287294	0.0240207
0.0447833	0.00736117	0.0260323	0.00107847	0.00802428	0.0203252	0.0279099	0.0246912
0.0452	0.00911206	0.0257269	0.00122935	0.00851601	0.0187382	0.026539	0.0244752
0.0456167	0.0114366	0.0240952	0.00135228	0.00950694	0.0170469	0.0260249	0.0240058
0.0460333	0.0132546	0.0212863	0.0015758	0.0105128	0.015907	0.026308	0.0236928
0.04645	0.0138953	0.0182465	0.0014808	0.0114441	0.0151321	0.026904	0.0233278
0.0468667	0.0131577	0.0162423	0.000787899	0.0124648	0.0149459	0.0277311	0.0221655
0.0472833	0.0116304	0.0158772	0.000284985	0.0132918	0.0157356	0.0287443	0.0203922
0.0477	0.00976026	0.0167638	0.000815839	0.0129193	0.0172704	0.0294223	0.0191405
0.0481167	0.00737608	0.0181496	0.0020396	0.010699	0.0186712	0.0286326	0.0186637
0.0485333	0.00520796	0.0194386	0.00350922	0.00759214	0.0189841	0.0259951	0.0186265
0.04895	0.00406802	0.0206456	0.00565499	0.00491738	0.0181645	0.0228733	0.0178367
0.0493667	0.00362843	0.0209585	0.00865571	0.00303239	0.0166297	0.0207499	0.0164658
0.0497833	0.00265986	0.0197589	0.0114497	0.00142306	0.0149086	0.0196248	0.0158548
0.0502	0.00122935	0.0176653	0.0126511	0.000476837	0.0136122	0.0192449	0.016056
0.0506167	0.000596046	0.0160486	0.0122432	0.000968575	0.0130534	0.0197813	0.0166371
0.0510333	0.000856817	0.0153482	0.0111423	0.00221282	0.0134408	0.0213906	0.0166968
0.05145	0.00118464	0.0148267	0.00956654	0.00277162	0.0148416	0.0225604	0.0170246
0.0518667	0.00124425	0.0143573	0.00770018	0.00245124	0.0168234	0.022307	0.0186339
0.0522833	0.00170618	0.0146329	0.00609085	0.00245869	0.0186265	0.0213459	0.0209808
0.0527	0.00225007	0.0158176	0.00510737	0.00318885	0.0197366	0.0203997	0.0233203
0.0531167	0.0019893	0.017263	0.00438653	0.00404567	0.020355	0.0192449	0.0245944
0.0535333	0.000990927	0.0184551	0.00355393	0.00417233	0.0208244	0.0172928	0.0251308
0.05395	0.000163913	0.0193417	0.0028275	0.00401586	0.021413	0.0155494	0.0254139
0.0543667	0.000193715	0.020057	0.00219047	0.00376254	0.0220016	0.0152364	0.0253096
0.0547833	0.00101328	0.0202805	0.00155345	0.00309944	0.0223592	0.0165775	0.024125
0.0552	0.00213832	0.0198781	0.00124611	0.00206381	0.0226572	0.0182465	0.022009
0.0556167	0.00350177	0.0191182	0.00161491	0.000752509	0.0229403	0.0193417	0.0207946
0.0560333	0.00505149	0.0189096	0.00213459	0.000104308	0.0237375	0.0205562	0.0211895
0.05645	0.00642985	0.0197887	0.00218488	-9.68575e-05	0.0251904	0.0223517	0.0220984
0.0568667	0.00730157	0.0212938	0.00188872	-0.000171363	0.0267252	0.0245199	0.0223443
0.0572833	0.00793487	0.0226796	0.00158139	-0.00026077	0.0281334	0.0261962	0.022769
0.0577	0.00899285	0.0234544	0.00120699	-0.000327826	0.0289828	0.0278205	0.0240058
0.0581167	0.0101328	0.0237152	0.000748783	4.47035e-05	0.029467	0.0301749	0.0247806
0.0585333	0.0105873	0.0229999	0.000469387	0.000819564	0.0291839	0.0323057	0.0241622
0.05895	0.0103861	0.021331	0.000402331	0.00219792	0.0279546	0.033088	0.0226349
0.0593667	0.010401	0.0193566	0.000329688	0.00397861	0.0266805	0.0318512	0.021331
0.0597833	0.0105724	0.0178963	0.000279397	0.00552833	0.0255927	0.0291243	0.0203326
0.0602	0.0101477	0.017494	0.000530854	0.00610203	0.0243038	0.0256971	0.0191778
0.0606167	0.00879169	0.017561	0.000899658	0.00568479	0.0225902	0.0218526	0.0181943
0.0610333	0.0070557	0.0177547	0.00124611	0.00476837	0.0213683	0.0186116	0.0176728
0.06145	0.00554323	0.0176653	0.00137463	0.003919	0.021182	0.0166744	0.0177398
0.0618667	0.00420213	0.0178069	0.00101142	0.00326335	0.0214204	0.0162497	0.01809
0.0622833	0.00279397	0.0190958	-0.000117347	0.00267476	0.0218153	0.0166371	0.0180975
0.0627	0.00162423	0.0210106	-0.00158697	0.00210851	0.0226945	0.0171587	0.0178739
0.0631167	0.00140071	0.0228509	-0.00276603	0.00151992	0.0240281	0.0184029	0.0177175
0.0635333	0.00203401	0.0242591	-0.00357628	0.000953674	0.0247955	0.020124	0.0179559
0.06395	0.00263751	0.0254884	-0.00382215	0.000618398	0.0246465	0.0215694	0.0187308
0.0643667	0.00258535	0.0262186	-0.00337511	0.000603497	0.0242367	0.0223517	0.0195876
0.0647833	0.00227988	0.0251532	-0.00206195	0.000439584	0.0240579	0.0225753	0.0196174
0.0652	0.00225007	0.0225827	-0.000832602	0.000171363	0.0240505	0.0224635	0.0182986
0.0656167	0.00267476	0.0201315	-0.000290573	0.000216067	0.0237823	0.0214577	0.0160038
0.0660333	0.00326335	0.0186488	-0.000122935	0.000707805	0.0234097	0.0203028	0.0137091
0.06645	0.00362098	0.018172	0.000173226	0.000864267	0.0230074	0.0202581	0.0115111
0.0668667	0.00344217	0.0180677	0.000631437	-4.47035e-05	0.0222698	0.0211149	0.00974536
0.0672833	0.00301748	0.0186414	0.000558794	-0.00101328	0.0209585	0.0221431	0.00946224
0.0677	0.00278652	0.0197366	5.02914e-05	-0.00128895	0.0194609	0.0224188	0.0107139
0.0681167	0.00276416	0.020273	-1.11759e-05	-0.00111759	0.0187233	0.0221208	0.0126436
0.0685333	0.00289083	0.0200272	0.000715256	-0.00111014	0.01885	0.0216886	0.0142679
0.06895	0.00334531	0.0191405	0.00162609	-0.00139326	0.0193417	0.0204965	0.0153109
0.0693667	0.00432134	0.0180602	0.00219606	-0.00104308	0.0199899	0.018537	0.015758
0.0697833	0.00523031	0.0168234	0.00267662	-0.000357628	0.0211447	0.0162944	0.0161752
0.0702	0.00534952	0.0158325	0.00337511	-8.19564e-05	0.0227764	0.0150278	0.0169799
0.0706167	0.00455231	0.0157207	0.00377186	-0.000223517	0.0241399	0.014998	0.0180975
0.0710333	0.00355393	0.0161156	0.00334159	-0.000730157	0.0244454	0.015378	0.0187457
0.07145	0.00303239	0.0165477	0.00219606	-0.00145286	0.0236407	0.0161156	0.0189766
0.0718667	0.00303239	0.0165105	0.00122376	-0.0025332	0.0224635	0.0170469	0.0194758
0.0722833	0.00374019	0.0157952	0.000854954	-0.00318885	0.0217184	0.0180453	0.0193939
0.0727	0.00499934	0.0143945	0.000977889	-0.00240654	0.0216067	0.0185147	0.0180602
0.0731167	0.00663102	0.0128448	0.00121817	-0.000499189	0.0216439	0.0184998	0.0161007
0.0735333	0.00809878	0.0123158	0.00160932	0.00151247	0.0219345	0.0181422	0.0150725
0.07395	0.00879169	0.0128523	0.00226311	0.00282377	0.0230372	0.0175163	0.0153556
0.0743667	0.00887364	0.0138879	0.00234693	0.00314415	0.0246987	0.0171736	0.0158399
0.0747833	0.00829995	0.0152066	0.00141375	0.00248849	0.0259578	0.0172481	0.0162125
0.0752	0.00743568	0.0170395	-0.000184402	0.000879169	0.0259131	0.0179037	0.0168458
0.0756167	0.00652671	0.0191554	-0.00159256	-0.0013262	0.0248477	0.0185147	0.0176355
0.0760333	0.00538677	0.0204369	-0.00265427	-0.0032559	0.0233129	0.0189468	0.0180975
0.07645	0.0044778	0.0206009	-0.00338629	-0.00412017	0.0218451	0.0192523	0.0182837
0.0768667	0.00400841	0.0202432	-0.00345334	-0.00371039	0.0209659	0.0192225	0.0188723
0.0772833	0.00386685	0.0194833	-0.00296161	-0.00277907	0.0206903	0.0189543	0.0200123
0.0777	0.00353157	0.0180155	-0.00255369	-0.00177324	0.0212863	0.0182688	0.0209808
0.0781167	0.00267476	0.0158101	-0.00256486	-0.000759959	0.0224933	0.0175983	0.0212267
0.0785333	0.00209361	0.013873	-0.00273809	0.000402331	0.0238046	0.0170171	0.0203848
0.07895	0.00210851	0.0132397	-0.00307336	0.00147521	0.0248402	0.0165105	0.0184625
0.0793667	0.00258535	0.0140592	-0.00365451	0.00248104	0.0254363	0.0162199	0.0157505
0.0797833	0.00359863	0.0160709	-0.00428036	0.00371039	0.0254661	0.0160038	0.0130162
0.0802	0.00526011	0.0182539	-0.00476092	0.00434369	0.0251681	0.015758	0.0113174
0.0806167	0.00732392	0.019908	-0.00499561	0.00366569	0.0252351	0.0153333	0.0106245
0.0810333	0.00877678	0.0210702	-0.00525266	0.00180304	0.0263453	0.0152886	0.0107437
0.08145	0.00923872	0.0217259	-0.00531972	-0.000245869	0.0281036	0.015676	0.0115857
0.0818667	0.00902265	0.0217184	-0.00500679	-0.00217557	0.0294149	0.0158399	0.0132173
0.0822833	0.0083074	0.0209659	-0.0043083	-0.00403822	0.0304356	0.015825	0.015296
0.0827	0.00697374	0.0203028	-0.00322983	-0.00517815	0.0313669	0.0160858	0.0166371
0.0831167	0.00542402	0.0204295	-0.00234134	-0.00520051	0.0321493	0.0168607	0.017181
0.0835333	0.004448	0.0209361	-0.0016652	-0.00422448	0.0317246	0.0176802	0.0175387
0.08395	0.00417233	0.0213608	-0.000983477	-0.00267476	0.0293776	0.0183061	0.0182763
0.0843667	0.00436604	0.0216216	-0.000368804	-0.000536442	0.0261366	0.0188127	0.0190958
0.0847833	0.00476092	0.0218898	0.000178814	0.00216067	0.0235364	0.0185966	0.0193343
0.0852	0.00555813	0.0226051	0.000782311	0.00514835	0.0222251	0.0176579	0.0192598
0.0856167	0.006482	0.0235811	0.00176579	0.0077039	0.0215918	0.016436	0.0189319
0.0860333	0.0071153	0.0241101	0.00275485	0.00907481	0.0213161	0.0153184	0.0185147
0.08645	0.00729412	0.0237674	0.00266544	0.00910461	0.0218228	0.014469	0.0178441
0.0868667	0.00684708	0.022769	0.00172667	0.00806898	0.0235736	0.0142455	0.0167713
0.0872833	0.00618398	0.0216812	0.000922009	0.00622124	0.0256971	0.0149608	0.0159144
0.0877	0.00549108	0.020273	0.00073202	0.00380725	0.027135	0.0161529	0.0159517
0.0881167	0.00463426	0.0186563	0.000553206	0.00204146	0.0274628	0.0173748	0.0173748
0.0885333	0.00350177	0.0177175	-0.000212342	0.00189245	0.0271797	0.0182688	0.0194833
0.08895	0.00234693	0.0177473	-0.000860542	0.00248104	0.0270084	0.0186488	0.0208989
0.0893667	0.00163168	0.0184774	-0.00127405	0.00221282	0.0267774	0.0187084	0.0212193
0.0897833	0.00102073	0.0189841	-0.00211224	0.000715256	0.0261292	0.0188872	0.0205785
0.0902	3.72529e-05	0.0186339	-0.00396185	-0.000968575	0.0250414	0.0191554	0.0191778
0.0906167	-0.000797212	0.0175238	-0.00624172	-0.00239909	0.0243038	0.0189766	0.0173002
0.0910333	-0.000953674	0.0161007	-0.00790693	-0.00403076	0.024274	0.0184849	0.0153631
0.09145	-0.000618398	0.0148192	-0.00895746	-0.00544637	0.0243858	0.0184104	0.0142902
0.0918667	-0.000588596	0.0136793	-0.0093542	-0.00552088	0.0242963	0.018701	0.0142977
0.0922833	-0.000841916	0.0134036	-0.00920333	-0.00416488	0.0243634	0.0194013	0.0152588
0.0927	-0.000543892	0.0141561	-0.00831485	-0.00289083	0.0250638	0.0205114	0.0173226
0.0931167	0.000186265	0.015147	-0.0068564	-0.00336766	0.0260398	0.0212416	0.0194907
0.0935333	0.000491738	0.0152066	-0.0052806	-0.00529736	0.0268668	0.0210032	0.0205562
0.09395	6.70552e-05	0.0145733	-0.00346452	-0.00733882	0.0276268	0.0200421	0.0201464
0.0943667	1.49012e-05	0.0143498	-0.00154227	-0.0082776	0.0279248	0.0193194	0.0193715
0.0947833	0.000782311	0.0142604	0.000217929	-0.00786036	0.0274852	0.0187233	0.0190884
0.0952	0.00146776	0.0141039	0.00113994	-0.00666827	0.02639	0.0175089	0.0187084
0.0956167	0.00137091	0.0138283	0.00110082	-0.00483543	0.0251979	0.0165999	0.0179335
0.0960333	0.000976026	0.0139549	0.000787899	-0.00280142	0.0244528	0.0170693	0.0175387
0.09645	0.00107288	0.0142753	0.000474975	-0.00118464	0.0242367	0.0188276	0.0179783
0.0968667	0.00122935	0.0139326	-0.000229105	-0.000976026	0.0242814	0.0205263	0.0185966
0.0972833	0.000715256	0.0130832	-0.00165962	-0.00223517	0.0241101	0.0212044	0.0185817
0.0977	-0.000596046	0.011988	-0.00325218	-0.00360608	0.0238419	0.0214353	0.018388
0.0981167	-0.00210106	0.0110269	-0.00450388	-0.0045076	0.0241622	0.0215843	0.0188425
0.0985333	-0.00335276	0.0100434	-0.00561029	-0.00468642	0.0249892	0.0214577	0.019148
0.09895	-0.00424683	0.00888109	-0.0067167	-0.00410527	0.0256822	0.0206158	0.0190288
0.0993667	-0.00479072	0.00805408	-0.00735931	-0.00303239	0.0261292	0.0196025	0.0186116
0.0997833	-0.00477582	0.00782311	-0.00701845	-0.00190735	0.0265017	0.0189468	0.0184625
0.1002	-0.00368059	0.00875443	-0.00607409	-0.00154227	0.0265688	0.0183284	0.0177994
0.100617	-0.00166148	0.010848	-0.0049565	-0.00154227	0.0256672	0.0170842	0.0160113
0.101033	0.000603497	0.0134334	-0.00382215	-0.00168383	0.0239238	0.0148937	0.0147596
0.10145	0.00227988	0.015609	-0.00276603	-0.00193715	0.0223145	0.0123158	0.0145957
0.101867	0.00306964	0.0166968	-0.00208989	-0.00213832	0.0211969	0.0100136	0.0151098
0.102283	0.00309944	0.0169352	-0.00223517	-0.00258535	0.0204146	0.00847876	0.0154525
0.1027	0.00243634	0.0163615	-0.00283867	-0.00355393	0.0195652	0.00787526	0.016056
0.103117	0.00156462	0.0150129	-0.00353157	-0.00519306	0.0186563	0.00821054	0.0175834
0.103533	0.00106543	0.0135228	-0.00388361	-0.00684708	0.0178441	0.00912696	0.0189021
0.10395	0.0012517	0.0127703	-0.00386685	-0.0082925	0.0168234	0.00988692	0.0193045
0.104367	0.00199676	0.012517	-0.00382774	-0.00981241	0.0155941	0.0102296	0.0188723
0.104783	0.003241	0.0120848	-0.00368804	-0.0113994	0.0145584	0.010483	0.0179037
0.1052	0.00472367	0.0112876	-0.00355952	-0.0122711	0.0143498	0.0111535	0.0169054
0.105617	0.00561774	0.0107288	-0.00320747	-0.0118315	0.0153035	0.0123531	0.0158772
0.106033	0.00534207	0.0107959	-0.00296161	-0.0102744	0.0167266	0.0137985	0.0152737
0.10645	0.00408292	0.0112429	-0.00307895	-0.00847876	0.0181124	0.0150278	0.0150353
0.106867	0.00258535	0.0123903	-0.00326335	-0.00730902	0.0192523	0.0153482	0.0147969
0.107283	0.00102073	0.0141636	-0.00350922	-0.00678748	0.0204816	0.0148937	0.0144243
0.1077	-0.000521541	0.015825	-0.00385567	-0.00662357	0.0216439	0.0137687	0.0132844
0.108117	-0.00144541	0.0163391	-0.00434183	-0.00684708	0.0222027	0.0119209	0.0116676
0.108533	-0.00167638	0.0157207	-0.00423565	-0.00791252	0.0220686	0.0102147	0.0100285
0.10895	-0.00159442	0.014931	-0.00310689	-0.00913441	0.0211596	0.00970811	0.00938028
0.109367	-0.00166893	0.0143945	-0.00170432	-0.00918657	0.019826	0.010781	0.01017
0.109783	-0.00203401	0.0140145	-0.000653788	-0.0077188	0.0176728	0.0125319	0.0120774
0.1102	-0.00266731	0.0140518	-0.000128523	-0.00592321	0.0149012	0.0144392	0.0147745
0.110617	-0.0037998	0.0150055	-0.000145286	-0.00469387	0.0118539	0.0166968	0.0170618
0.111033	-0.00476837	0.0165477	-0.00089407	-0.00394881	0.00961125	0.0188202	0.0184327
0.11145	-0.00482053	0.0176728	-0.00225194	-0.0038296	0.00948459	0.0203028	0.0187457
0.111867	-0.00421703	0.0178292	-0.00328012	-0.00485778	0.011228	0.0211522	0.018172
0.112283	-0.00353903	0.0176206	-0.00348687	-0.0070259	0.0139251	0.0216737	0.0169501
0.1127	-0.00277907	0.0173375	-0.00289455	-0.00904501	0.0160635	0.021778	0.0156015
0.113117	-0.00163168	0.016734	-0.00195019	-0.0102744	0.0174493	0.0214502	0.0153035
0.113533	-0.000447035	0.0154302	-0.00151433	-0.0111014	0.0182763	0.0208542	0.0163317
0.11395	0.000178814	0.0134259	-0.00191666	-0.0117496	0.0184476	0.0200495	0.0177324
0.114367	0.000290573	0.0114515	-0.00269338	-0.0117645	0.0179783	0.0186339	0.019446
0.114783	0.000290573	0.00990927	-0.00346452	-0.0107661	0.0171661	0.0164136	0.0214055
0.1152	-2.23517e-05	0.00944734	-0.00434183	-0.00949204	0.0168532	0.0139177	0.0231341
0.115617	-0.000633299	0.0104159	-0.00548735	-0.00869483	0.0172853	0.0117272	0.023596
0.116033	-0.00166893	0.0125915	-0.00616908	-0.00862032	0.0182539	0.0105128	0.0223145
0.11645	-0.00311434	0.0154227	-0.00592321	-0.00891089	0.0188276	0.0101104	0.0203326
0.116867	-0.00499189	0.0181943	-0.00526942	-0.00912696	0.0185445	0.0102296	0.0182241
0.117283	-0.00719726	0.0211149	-0.00442564	-0.00937283	0.0176132	0.0105873	0.0165552
0.1177	-0.00869483	0.0240207	-0.00325777	-0.00995398	0.0161976	0.0111237	0.0150651
0.118117	-0.00865758	0.0259057	-0.00181608	-0.010632	0.0146478	0.0116825	0.0139326
0.118533	-0.00681728	0.0262633	-0.000905246	-0.0107288	0.0129789	0.011988	0.0136793
0.11895	-0.00429153	0.025779	-0.000949949	-0.0101104	0.0116751	0.012137	0.0141785
0.119367	-0.00198185	0.025481	-0.00154227	-0.00941008	0.0109151	0.0127107	0.0146478
0.119783	0.000312924	0.0249967	-0.00225194	-0.00905245	0.010401	0.0143945	0.014402
0.1202	0.00226498	0.0237152	-0.0028275	-0.00859797	0.0103191	0.0166148	0.013873
0.120617	0.00266731	0.0221133	-0.00312366	-0.00790507	0.0104755	0.0185147	0.0132769
0.121033	0.00077486	0.0206977	-0.00276044	-0.00739098	0.0107735	0.0191852	0.012286
0.12145	-0.00206381	0.0193119	-0.00157021	-0.00739098	0.011377	0.0189394	0.0109226
0.121867	-0.00359863	0.0174195	0.000100583	-0.00798702	0.0125915	0.0181496	0.0101551
0.122283	-0.00332296	0.0153333	0.0016652	-0.00908226	0.0140071	0.0169352	0.0104234
0.1227	-0.00236183	0.01394	0.00255369	-0.0103414	0.0146329	0.015974	0.0114441
0.123117	-0.00161678	0.0135601	0.00288896	-0.0112429	0.0137463	0.0156909	0.0129491
0.123533	-0.00143796	0.0142679	0.00293367	-0.0112206	0.0118837	0.0162497	0.0146627
0.12395	-0.00151992	0.0156462	0.00240281	-0.0111833	0.0101551	0.0169352	0.0162199
0.124367	-0.0019595	0.0172034	0.000927597	-0.0119358	0.00888109	0.0176355	0.0169203
0.124783	-0.00277162	0.0186339	-0.00121817	-0.0128448	0.0083074	0.0183284	0.0168979
0.1252	-0.00368804	0.019528	-0.00296719	-0.0132322	0.00858307	0.0187457	0.0165403
0.125617	-0.00426918	0.0195727	-0.00393949	-0.0131354	0.0103861	0.0191107	0.0158772
0.126033	-0.00400841	0.018701	-0.00459328	-0.0136793	0.0131205	0.0196695	0.0152588
0.12645	-0.00350177	0.0175089	-0.00517443	-0.0140294	0.0151247	0.0209883	0.0151917
0.126867	-0.00356138	0.0166222	-0.00538677	-0.0128597	0.0156686	0.0222474	0.0159964
0.127283	-0.00423938	0.0157878	-0.00494532	-0.0103936	0.0149682	0.0230297	0.0172034
0.1277	-0.00432134	0.0143945	-0.00444241	-0.00801682	0.0138804	0.0236779	0.0180602
0.128117	-0.0031665	0.013046	-0.00428595	-0.00666082	0.0126585	0.0240803	0.0182092
0.128533	-0.00125915	0.0124648	-0.00428036	-0.00569224	0.0112951	0.0242293	0.017345
0.12895	0.000454485	0.0126287	-0.00406243	-0.00468642	0.00967085	0.023514	0.0157058
0.129367	0.0013262	0.0129715	-0.00378303	-0.00336766	0.0082925	0.0226349	0.013873
0.129783	0.00137091	0.0132397	-0.00364892	-0.00231713	0.00812113	0.0217706	0.0120252
0.1302	0.00025332	0.0140518	-0.00308454	-0.00211597	0.00902265	0.0205934	0.0103563
0.130617	-0.0018999	0.015378	-0.00220165	-0.00298023	0.0100955	0.0196546	0.00922382
0.131033	-0.00394881	0.016652	-0.0018049	-0.00439584	0.0110865	0.0191107	0.00947714
0.13145	-0.00445545	0.0169799	-0.00193901	-0.00546128	0.0124574	0.0189841	0.0104383
0.131867	-0.00283867	0.0160113	-0.00200048	-0.00625849	0.0139624	0.0183061	0.0108927
0.132283	-8.19564e-05	0.0139922	-0.00163726	-0.00667572	0.0148192	0.0173897	0.0108629
0.1327	0.00268221	0.0114068	-0.0014808	-0.00614673	0.0147074	0.0170395	0.0108629
0.133117	0.00498444	0.0089854	-0.00150315	-0.00441819	0.0140592	0.0165626	0.010781
0.133533	0.0063777	0.00739098	-0.000810251	-0.00209361	0.0131875	0.0156239	0.00978261
0.13395	0.00668317	0.00704825	0.000385568	-0.000409782	0.0124648	0.0145286	0.0083223
0.134367	0.00599772	0.00780076	0.00135787	-4.47035e-05	0.0121221	0.0138655	0.00709295
0.134783	0.00481307	0.00918657	0.00167079	-0.00117719	0.0121817	0.0137165	0.00677258
0.1352	0.003919	0.0109747	0.00172108	-0.00349432	0.0128821	0.0135675	0.00730902
0.135617	0.00330806	0.0121817	0.00181608	-0.00594556	0.0138655	0.0138879	0.00841171
0.136033	0.00282377	0.0118986	0.00158697	-0.0077188	0.0152066	0.0146851	0.00982732
0.13645	0.00218302	0.0109896	0.000759959	-0.0089258	0.0166297	0.0155419	0.0112206
0.136867	0.00111014	0.0111908	-0.000301749	-0.0105351	0.0178367	0.0167191	0.012815
0.137283	-6.70552e-05	0.0131056	-0.000933185	-0.0123084	0.0182688	0.0182018	0.0135824
0.1377	-0.00134855	0.0148788	-0.001112	-0.0132471	0.0175014	0.0195429	0.0133887
0.138117	-0.00200421	0.0153109	-0.00121817	-0.0129119	0.0159144	0.0204593	0.0133589
0.138533	-0.00206381	0.0150278	-0.0016205	-0.0121817	0.0135303	0.0212118	0.0137091
0.13895	-0.00189245	0.0142455	-0.00201166	-0.0118166	0.0107139	0.0226274	0.0141039
0.139367	-0.00149757	0.0125617	-0.00231341	-0.0109822	0.00806898	0.0247732	0.0138134
0.139783	-0.000923872	0.0102445	-0.00272133	-0.00914931	0.00642985	0.0267923	0.0137463
0.1402	-6.70552e-05	0.00854582	-0.00317953	-0.00684708	0.00598282	0.0282675	0.0144839
0.140617	0.000558794	0.00844151	-0.00343099	-0.00500679	0.00600517	0.0292286	0.01546
0.141033	0.00110269	0.00932813	-0.00289455	-0.00401586	0.00627339	0.0299141	0.0166371
0.14145	0.00172108	0.0104085	-0.00159256	-0.00347942	0.00715256	0.0295788	0.0180155
0.141867	0.00251085	0.01093	-3.35276e-05	-0.00309944	0.00871718	0.0274181	0.0196919
0.142283	0.00333041	0.0106767	0.00106171	-0.00302494	0.0102893	0.0241175	0.0211149
0.1427	0.00423938	0.0103489	0.00148639	-0.00336021	0.0111312	0.0215396	0.0216588
0.143117	0.00525266	0.0103563	0.00145845	-0.00441074	0.0117272	0.020355	0.0210255
0.143533	0.00624359	0.0108555	0.0011567	-0.00552088	0.012055	0.0196323	0.0192896
0.14395	0.00720471	0.011757	0.000692904	-0.00610203	0.0115186	0.0186861	0.0167787
0.144367	0.0076592	0.0129715	0.000206754	-0.0063926	0.0101626	0.0178367	0.0143573
0.144783	0.00692159	0.0138804	-4.47035e-05	-0.00651181	0.00882149	0.0175312	0.0123233
0.1452	0.00483543	0.0138804	-0.000139698	-0.00621378	0.0083223	0.0167415	0.010252
0.145617	0.00244379	0.0134557	-2.23517e-05	-0.00528991	0.00782311	0.0151247	0.00847131
0.146033	0.000551343	0.0132322	0.000273809	-0.00414252	0.00699609	0.0139102	0.0077486
0.14645	-0.000678003	0.0131801	0.000318512	-0.0032112	0.00622124	0.014469	0.00823289
0.146867	-0.00143796	0.0130311	-2.79397e-05	-0.00201911	0.00603497	0.0168607	0.00847131
0.147283	-0.00165403	0.0129566	-0.000575557	-0.000372529	0.00622869	0.019744	0.00835955
0.1477	-0.00142306	0.0129491	-0.00100583	0.00119209	0.00604242	0.0225753	0.0090003
0.148117	-0.00142306	0.0123605	-0.00136346	0.00225007	0.00597537	0.0246987	0.0105128
0.148533	-0.00184029	0.011012	-0.00181608	0.00233948	0.00640005	0.0252128	0.0120252
0.14895	-0.00286847	0.00912696	-0.00197813	0.0019148	0.00696629	0.023827	0.0130609
0.149367	-0.00438839	0.00739098	-0.0018049	0.00111014	0.0070855	0.0210181	0.0141039
0.149783	-0.00595301	0.00600517	-0.00147521	0.000201166	0.00688434	0.0182465	0.0145137
0.1502	-0.00695884	0.00498444	-0.00103936	-0.000908971	0.00739843	0.0162125	0.0140592
0.150617	-0.00730157	0.00441819	-0.000335276	-0.00235438	0.00871718	0.0150055	0.0134483
0.151033	-0.00741333	0.00450015	0.000474975	-0.00350922	0.0100657	0.0145808	0.0129938
0.15145	-0.00714511	0.0051856	0.00119582	-0.00427663	0.0110716	0.0148565	0.0125319
0.151867	-0.00601262	0.00626594	0.00207871	-0.00481307	0.0111982	0.0156909	0.0119135
0.152283	-0.00378489	0.00776351	0.0031516	-0.00556558	0.0105277	0.0165403	0.0117123
0.1527	-0.00155717	0.00922382	0.00423565	-0.00657886	0.00924617	0.0167117	0.0119135
0.153117	0.000104308	0.00973046	0.00469945	-0.00733882	0.00775605	0.0161603	0.0117198
0.153533	0.00117719	0.00887364	0.00450388	-0.00732392	0.0071153	0.0153631	0.0109747
0.15395	0.00159442	0.00777841	0.0037048	-0.0063479	0.0076741	0.0146106	0.00990927
0.154367	0.00116974	0.00719726	0.00248104	-0.00493973	0.00946224	0.0140294	0.00886619
0.154783	-0.000402331	0.00660121	0.00146404	-0.00412017	0.0116453	0.0134557	0.00845641
0.1552	-0.0019595	0.00594556	0.000664964	-0.00406802	0.0132024	0.0127926	0.00847131
0.155617	-0.00289083	0.00590086	0.000178814	-0.00414252	0.0138804	0.0119507	0.00862777
0.156033	-0.003241	0.00657141	0.000312924	-0.00371784	0.0134707	0.0111982	0.0089705
0.15645	-0.003919	0.00724196	0.00136346	-0.00284612	0.0119656	0.0111684	0.00970811
0.156867	-0.00534952	0.00741333	0.00296719	-0.00183284	0.00987947	0.0122562	0.0106618
0.157283	-0.00658631	0.00753254	0.0042133	-0.000342727	0.00777841	0.0142604	0.0109896
0.1577	-0.00720471	0.00790507	0.00496209	0.00167638	0.00653416	0.017114	0.0109822
0.158117	-0.00696629	0.00869483	0.00543706	0.00375509	0.00614673	0.0204965	0.0114664
0.158533	-0.00626594	0.00956654	0.00554882	0.00519306	0.0058189	0.0234619	0.0127479
0.15895	-0.00484288	0.00951439	0.00507384	0.00566989	0.00543147	0.0251234	0.0147671
0.159367	-0.00286102	0.00812858	0.00410713	0.00519306	0.00490248	0.0252277	0.0171587
0.159783	-0.00124425	0.00604987	0.00306778	0.0038743	0.00455231	0.0241697	0.0191554
0.1602	-0.000439584	0.00394881	0.00233017	0.00214577	0.00434369	0.0223145	0.0195131
0.160617	-0.000402331	0.00204146	0.00210106	0.000454485	0.00407547	0.0202656	0.0179932
0.161033	-0.000447035	0.000499189	0.002129	-0.00122935	0.00425428	0.0187531	0.0153854
0.16145	-0.000417233	-7.45058e-05	0.00236929	-0.00283122	0.00482053	0.0184029	0.0125095
0.161867	5.96046e-05	0.000506639	0.00301748	-0.0038892	0.00554323	0.0190362	0.00980496
0.162283	0.000737607	0.00163168	0.00440888	-0.0038147	0.00607222	0.0197738	0.00771135
0.1627	0.00119209	0.00285357	0.00599585	-0.00257045	0.00607222	0.019975	0.00683218
0.163117	0.00124425	0.00385195	0.0068564	-0.000655651	0.00604242	0.0195354	0.0070855
0.163533	0.000797212	0.00455976	0.00713021	0.00117719	0.00612438	0.0188202	0.00787526
0.16395	8.9407e-05	0.00498444	0.00735372	0.00233203	0.0058189	0.0176951	0.00878423
0.164367	-0.000886619	0.00491738	0.00768341	0.00265241	0.00473112	0.0163168	0.00986457
0.164783	-0.00151992	0.00429153	0.00707433	0.00182539	0.00335276	0.0155792	0.0116229
0.1652	-0.00154972	0.00340492	0.00501797	0.000156462	0.00272691	0.0159517	0.0142157
0.165617	-0.00128895	0.00274926	0.0025481	-0.00149012	0.00275671	0.0171587	0.0169277
0.166033	-0.000759959	0.00242889	0.000748783	-0.00238419	0.00285357	0.0185445	0.0191033
0.16645	7.45058e-06	0.00222772	-0.000111759	-0.00230223	0.00308454	0.0192449	0.0201464
0.166867	0.000923872	0.00246614	-0.000569969	-0.0013113	0.00385195	0.0187904	0.0199303
0.167283	0.00156462	0.00339747	-0.000245869	0.000312924	0.00510365	0.0172928	0.0183731
0.1677	0.00181794	0.00456721	0.00132434	0.00145286	0.00607222	0.0156164	0.0163168
0.168117	0.00142306	0.00517815	0.00358187	0.00124425	0.00604987	0.0145659	0.0148863
0.168533	0.000327826	0.00561774	0.00534207	0.000305474	0.00535697	0.0139773	0.0140071
0.16895	-0.000819564	0.00656396	0.00611879	-0.000491738	0.00473857	0.0139549	0.0133067
0.169367	-0.00119954	0.00783801	0.0062976	-0.0013411	0.00455231	0.0143647	0.0128672
0.169783	-0.00089407	0.0089407	0.00594556	-0.00223517	0.004448	0.0145808	0.0131577
0.1702	-0.000759959	0.00997633	0.00533089	-0.00233948	0.003919	0.0142232	0.0137612
0.170617	-0.000365078	0.0115037	0.00506826	-0.0012964	0.00345707	0.0134632	0.0144467
0.171033	0.000581145	0.0130832	0.00537559	-0.000141561	0.0032261	0.013046	0.0152662
0.17145	0.0013262	0.0138357	0.00562146	0.000298023	0.00332296	0.0131801	0.0163019
0.171867	0.000506639	0.0136048	0.00543706	0.000745058	0.00359863	0.0136048	0.0173151
0.172283	-0.00119954	0.0125319	0.00533648	0.00168383	0.0037998	0.0143424	0.0182688
0.1727	-0.00213832	0.010781	0.00572205	0.00250339	0.00439584	0.0152886	0.0190958
0.173117	-0.0025481	0.00867248	0.00562705	0.00222027	0.00540912	0.015825	0.0190139
0.173533	-0.00330806	0.0070855	0.00462122	0.000953674	0.00701845	0.0151321	0.0179633
0.17395	-0.00423193	0.00678003	0.00340864	-0.000670552	0.00920147	0.0134632	0.0166073
0.174367	-0.00393391	0.00735372	0.00228547	-0.00231713	0.0114664	0.0119731	0.015825
0.174783	-0.00275671	0.00820309	0.00103936	-0.00365078	0.013724	0.0114739	0.0157058
0.1752	-0.00202656	0.00912696	-0.000804663	-0.00447035	0.0153631	0.0114813	0.0161901
0.175617	-0.00167638	0.0104383	-0.00216253	-0.00481307	0.0162944	0.0115409	0.0170618
0.176033	-0.000819564	0.0117347	-0.00253692	-0.00516325	0.0165105	0.0119135	0.0180379
0.17645	0.000290573	0.0123456	-0.00227429	-0.00564754	0.0161305	0.0124797	0.0187606
0.176867	0.000759959	0.0125319	-0.00132434	-0.00618398	0.0160336	0.0129342	0.0188351
0.177283	0.00051409	0.0129119	0.000273809	-0.00689179	0.016138	0.0130534	0.018023
0.1777	4.47035e-05	0.0133738	0.00224076	-0.00771135	0.0160933	0.0132099	0.0161082
0.178117	-0.000782311	0.0125021	0.00340864	-0.00808388	0.0155717	0.0136718	0.0140741
0.178533	-0.00225007	0.00987947	0.00372715	-0.00739098	0.0146329	0.0143647	0.0125617
0.17895	-0.00370294	0.00664592	0.00386685	-0.00579655	0.0131279	0.0151172	0.0116229
0.179367	-0.00460446	0.00414252	0.00377744	-0.00420958	0.0108629	0.0155643	0.0111163
0.179783	-0.00458211	0.00258535	0.00293925	-0.0031963	0.00853092	0.015147	0.0108331
0.1802	-0.00376999	0.00165403	0.00129081	-0.00285357	0.00716746	0.0143722	0.0110865
0.180617	-0.00224262	0.00122935	-2.23517e-05	-0.00277907	0.00685453	0.0143275	0.0115559
0.181033	-0.000208616	0.00134855	-0.000575557	-0.00248849	0.00675768	0.0151992	0.0120923
0.18145	0.00169873	0.00207126	-0.000821427	-0.00190735	0.00651926	0.0161082	0.0129566
0.181867	0.00305474	0.00326335	-0.000815839	-0.00149012	0.00590831	0.016056	0.0141785
0.182283	0.00317395	0.00443309	-7.82311e-05	-0.0012815	0.00513345	0.0152364	0.0156462
0.1827	0.00213087	0.00506639	0.00169314	-0.000402331	0.00396371	0.0141636	0.0167266
0.183117	0.000648201	0.00562519	0.00363775	0.000812113	0.00252575	0.0127032	0.0171661
0.183533	-0.00100583	0.00688434	0.0046771	0.00113249	0.00160932	0.0106916	0.0166819
0.18395	-0.00245869	0.00851601	0.00481121	-9.68575e-05	0.00155717	0.00889599	0.0149831
0.184367	-0.00311434	0.00938028	0.00426918	-0.00165403	0.00218302	0.00812113	0.0126809
0.184783	-0.00271946	0.00952184	0.00334717	-0.00233203	0.00289083	0.00863522	0.0109151
0.1852	-0.00206381	0.00987202	0.002129	-0.00280887	0.00371784	0.0100508	0.00993162
0.185617	-0.00205636	0.0106245	0.00130199	-0.00350177	0.00469387	0.0123605	0.00899285
0.186033	-0.00210106	0.0107512	0.00141375	-0.00412762	0.00563264	0.0153109	0.00866502
0.18645	-0.00160932	0.00999123	0.00167638	-0.00409782	0.00676513	0.0176653	0.0101551
0.186867	-0.00130385	0.00935793	0.00145286	-0.00335276	0.00818074	0.019148	0.0131279
0.187283	-0.00172854	0.00927597	0.000754371	-0.00249594	0.00923872	0.0198185	0.015974
0.1877	-0.00267476	0.00942498	0.000184402	-0.0018701	0.009574	0.0196099	0.0179633
0.188117	-0.00349432	0.00927597	-0.000441447	-0.00163913	0.00981241	0.0180081	0.0196919
0.188533	-0.00411272	0.00964105	-0.00119023	-0.00169128	0.0100061	0.0150949	0.0208542
0.18895	-0.00455976	0.0106171	-0.00121817	-0.00159442	0.00919402	0.0126809	0.0205413
0.189367	-0.00505149	0.0109151	-0.000201166	-0.00167638	0.007011	0.0116602	0.0189096
0.189783	-0.00543147	0.0102669	0.00119023	-0.00204891	0.00490993	0.0114217	0.0169203
0.1902	-0.00456721	0.00916421	0.00174344	-0.00261515	0.00408292	0.0111833	0.0154674
0.190617	-0.00219047	0.00808388	0.00121258	-0.00341237	0.00404567	0.0109375	0.0146106
0.191033	0.000402331	0.00644475	0	-0.00412762	0.00437349	0.01131	0.0141934
0.19145	0.00158697	0.00437349	-0.00167079	-0.0045374	0.00504404	0.0115633	0.0141561
0.191867	0.00165403	0.00337511	-0.00330247	-0.00435859	0.00628084	0.0107512	0.0143945
0.192283	0.00122935	0.00373274	-0.004353	-0.00426173	0.00756979	0.00955164	0.0145733
0.1927	-5.96046e-05	0.00513345	-0.00442006	-0.0045225	0.00838935	0.00884384	0.0140369
0.193117	-0.0025332	0.00762939	-0.00406802	-0.00393391	0.00902265	0.00875443	0.0126883
0.193533	-0.00521541	0.0108331	-0.00369362	-0.00238419	0.00924617	0.00815093	0.0115857
0.19395	-0.00675768	0.0138059	-0.0031013	-0.00122935	0.00885874	0.00678748	0.0116006
0.194367	-0.00698864	0.0152513	-0.00246428	-0.00169128	0.00777841	0.00569969	0.0119284
0.194783	-0.00637025	0.0151098	-0.0020396	-0.00332296	0.0064224	0.00549108	0.0112951
0.1952	-0.00522286	0.0138506	-0.00186637	-0.00463426	0.00526756	0.0057593	0.0100061
0.195617	-0.00378489	0.0119284	-0.00136346	-0.00531972	0.00420958	0.00591576	0.00942498
0.196033	-0.00261515	0.0101551	-0.000575557	-0.00505149	0.00362098	0.00632554	0.00929832
0.19645	-0.00193715	0.00896305	-0.000111759	-0.00373274	0.00409037	0.0076592	0.00874698
0.196867	-0.00153482	0.00838935	0.000229105	-0.00184774	0.00582635	0.00973046	0.00812113
0.197283	-0.0013411	0.00812858	0.000614673	0.00076741	0.00827014	0.0113547	0.00893325
0.1977	-0.00169128	0.00791997	0.000933185	0.0032261	0.0106767	0.012368	0.0114292
0.198117	-0.00265241	0.00724196	0.00114553	0.00441074	0.0129119	0.0130087	0.0140741
0.198533	-0.00366569	0.00609457	0.00135228	0.00370294	0.0148043	0.0137612	0.015907
0.19895	-0.00406057	0.00498444	0.00149198	0.00201166	0.0158846	0.0146925	0.0171512
0.199367	-0.00372529	0.00455231	0.00111759	0.00111759	0.0158548	0.0151619	0.0181496
0.199783	-0.00291318	0.00489503	0.000430271	0.000625849	0.0149012	0.0150055	0.018619
0.2002	-0.00156462	0.00562519	-0.000122935	0.000342727	0.0135601	0.0139922	0.0184327
0.200617	0.000156462	0.00670552	-0.000737607	0.000819564	0.0120029	0.0129268	0.0179186
0.201033	0.00173599	0.00821799	-0.0016205	0.00233203	0.0104979	0.0124201	0.0174344
0.20145	0.00212342	0.00949949	-0.00231341	0.00415742	0.00958145	0.0125691	0.0165775
0.201867	0.00090152	0.00979751	-0.00253692	0.00492483	0.00945479	0.0134557	0.0153407
0.202283	-0.000953674	0.00900775	-0.00238605	0.005126	0.00999123	0.0147	0.0142157
0.2027	-0.00301003	0.00776351	-0.00191107	0.00514835	0.010781	0.0161007	0.0136122
0.203117	-0.00479072	0.00640005	-0.000933185	0.00432134	0.0117272	0.0170618	0.013642
0.203533	-0.00647455	0.00485778	0.000664964	0.0019595	0.0125915	0.0169799	0.0140443
0.20395	-0.0077486	0.00399351	0.00195578	-0.00127405	0.0133589	0.0157878	0.0148416
0.204367	-0.00777841	0.00438094	0.00235252	-0.0038743	0.0140071	0.0140741	0.0159144
0.204783	-0.00662357	0.0057146	0.00172108	-0.00502169	0.0142679	0.0128672	0.0168979
0.2052	-0.00479817	0.00729412	0.000407919	-0.00478327	0.0141338	0.0123978	0.0172704
0.205617	-0.00363588	0.00887364	-0.0010673	-0.00359118	0.0136793	0.0122339	0.017114
0.206033	-0.00304729	0.0102371	-0.00250898	-0.00184774	0.0132471	0.0123307	0.0167415
0.20645	-0.00226498	0.010848	-0.00311807	-0.000275671	0.0125244	0.0128746	0.0163168
0.206867	-0.00166148	0.0107661	-0.00283867	0.000976026	0.0117421	0.0135303	0.0157729
0.207283	-0.00192225	0.0105873	-0.00231341	0.00163913	0.0113398	0.0138059	0.0151396
0.2077	-0.00283867	0.0104159	-0.00208989	0.00141561	0.0109226	0.0136718	0.0151768
0.208117	-0.00335276	0.0101328	-0.00208989	0.000566244	0.0102594	0.0131503	0.0159889
0.208533	-0.00344962	0.00973046	-0.00205636	-0.000573695	0.00964105	0.012055	0.0168309
0.20895	-0.00377744	0.00961125	-0.0025928	-0.00105798	0.00990182	0.0105277	0.0172704
0.209367	-0.00450015	0.00987202	-0.00371039	-0.00064075	0.0108033	0.00941753	0.0176653
0.209783	-0.00549108	0.0103489	-0.00478886	-0.000193715	0.0117943	0.00865012	0.0187531
0.2102	-0.00644475	0.0108555	-0.00539236	-0.000692904	0.0130087	0.00786781	0.0197142
0.210617	-0.00716746	0.0112206	-0.00599585	-0.00239909	0.0141636	0.00742078	0.0198558
0.211033	-0.00775605	0.01169	-0.00670552	-0.00410527	0.0149384	0.007689	0.0197217
0.21145	-0.00879169	0.0120774	-0.00694022	-0.00528991	0.0150204	0.00848621	0.0192896
0.211867	-0.0102893	0.011988	-0.0064373	-0.00666827	0.0145733	0.00908226	0.0178665
0.212283	-0.0114143	0.0110418	-0.00543147	-0.00855327	0.0142008	0.00978261	0.0149831
0.2127	-0.0121444	0.0100806	-0.00417419	-0.00985712	0.0143498	0.0105202	0.0118837
0.213117	-0.0130609	0.0104755	-0.00236929	-0.00943243	0.0152066	0.0103936	0.00986457
0.213533	-0.0139847	0.0121221	-0.000793487	-0.00791252	0.0161752	0.00919402	0.00935048
0.21395	-0.0137761	0.0134483	-0.000122935	-0.00650436	0.0166222	0.00753254	0.01055
0.214367	-0.0121444	0.0140592	-0.000597909	-0.00572205	0.0165179	0.00649691	0.0130534
0.214783	-0.0100508	0.0150204	-0.00144169	-0.00531972	0.0160486	0.00590831	0.0161678
0.2152	-0.00859052	0.0163391	-0.002129	-0.00525266	0.0151545	0.00556558	0.0191182
0.215617	-0.00789762	0.0168383	-0.00294484	-0.00544637	0.0143796	0.00573695	0.0214204
0.216033	-0.00768155	0.0159591	-0.00348687	-0.00570715	0.0141263	0.00678003	0.0224113
0.21645	-0.00797212	0.0149757	-0.00351481	-0.00610948	0.0144839	0.00845641	0.0223443
0.216867	-0.00846386	0.0143275	-0.00273809	-0.0064373	0.0149161	0.0100061	0.0220835
0.217283	-0.00881404	0.0133216	-0.0018049	-0.0064373	0.0147372	0.0114366	0.0217333
0.2177	-0.00849366	0.0122115	-0.00111759	-0.00591576	0.0139028	0.0130534	0.020586
0.218117	-0.00731647	0.0114217	-0.00070408	-0.00549853	0.012584	0.0151172	0.0181943
0.218533	-0.00590831	0.0113994	-0.000491738	-0.00528991	0.0115708	0.0172332	0.0153109
0.21895	-0.00448525	0.0119507	-0.000407919	-0.00480562	0.0115931	0.0189617	0.0126064
0.219367	-0.0038445	0.0129566	-0.000944361	-0.00408292	0.0128672	0.0200123	0.0102893
0.219783	-0.00414997	0.0143871	-0.00189431	-0.00315905	0.0149831	0.0200644	0.00877678
0.2202	-0.00490993	0.0155196	-0.00338629	-0.00230223	0.0172034	0.0194088	0.00828505
0.220617	-0.00570715	0.0156984	-0.00517443	-0.00145286	0.0190288	0.0187904	0.00876188
0.221033	-0.00608712	0.0145733	-0.00676699	-0.000707805	0.0198334	0.0183508	0.00971556
0.22145	-0.00667572	0.0124201	-0.00779517	-0.000469387	0.0187904	0.0177994	0.0104085
0.221867	-0.00727922	0.0104606	-0.00775047	-0.000327826	0.0161156	0.0168532	0.0109598
0.222283	-0.00756234	0.00965595	-0.00699609	-0.000111759	0.0129938	0.0159591	0.0113547
0.2227	-0.00748783	0.00987947	-0.00547059	-0.000216067	0.0104755	0.0154227	0.0118017
0.223117	-0.00718236	0.0106618	-0.00355952	-0.00111759	0.00869483	0.0149831	0.0125319
0.223533	-0.00675023	0.0116676	-0.002224	-0.0031814	0.0076741	0.0142679	0.0138432
0.22395	-0.00590831	0.0129044	-0.00183284	-0.005804	0.00771135	0.0131056	0.0162497
0.224367	-0.00504404	0.0129938	-0.00230782	-0.00837445	0.00823289	0.0114888	0.0188053
0.224783	-0.0044927	0.0114068	-0.00341423	-0.0103489	0.00873208	0.00971556	0.0205263
0.2252	-0.00429153	0.00920892	-0.00524148	-0.0110865	0.00949949	0.00834465	0.0215918
0.225617	-0.00405312	0.00782311	-0.00714697	-0.0103712	0.0100881	0.00759214	0.0224411
0.226033	-0.0038296	0.00753999	-0.00810251	-0.00829995	0.0096336	0.00727177	0.0229701
0.22645	-0.00360608	0.00725687	-0.00804104	-0.00542402	0.00840425	0.007011	0.0223741
0.226867	-0.00314415	0.00727177	-0.00767224	-0.00260025	0.00803918	0.00725687	0.0213385
0.227283	-0.00268221	0.00762939	-0.00733137	-0.00102818	0.00929087	0.00794977	0.021033
0.2277	-0.00240654	0.00780821	-0.00682846	-0.00125915	0.0106245	0.00850111	0.0209659
0.228117	-0.00268966	0.00724942	-0.00649877	-0.00266731	0.011608	0.00852346	0.0208169
0.228533	-0.00330806	0.00667572	-0.00675023	-0.00441819	0.0128821	0.00870228	0.0208095
0.22895	-0.00382215	0.00762194	-0.00738166	-0.00595301	0.0144169	0.00997633	0.0213236
0.229367	-0.00418723	0.00979751	-0.00761077	-0.00697374	0.0153109	0.0114068	0.0213236
0.229783	-0.00443309	0.0119805	-0.00685081	-0.00692904	0.0146106	0.0117347	0.0197589
0.2302	-0.00477582	0.0135526	-0.00554882	-0.00561774	0.0133216	0.010848	0.0172332
0.230617	-0.00490248	0.0148639	-0.00392832	-0.0038594	0.0123307	0.00986457	0.0144467
0.231033	-0.00430644	0.0159368	-0.00219606	-0.00263006	0.0117496	0.00913441	0.0118762
0.23145	-0.00339747	0.0160038	-0.000625849	-0.0026077	0.0115931	0.00835955	0.00955164
0.231867	-0.00277907	0.0155792	0.00037998	-0.0039041	0.0116527	0.00814349	0.00791252
0.232283	-0.00271946	0.0155643	0.000480562	-0.00569969	0.0115782	0.00955164	0.00755489
0.2327	-0.00271946	0.0161082	2.79397e-05	-0.00733137	0.0104755	0.0120103	0.00886619
0.233117	-0.00269711	0.0163689	-0.000692904	-0.00831485	0.0083372	0.0141338	0.0114366
0.233533	-0.0032708	0.0158548	-0.00165962	-0.00810623	0.00654906	0.01508	0.0139922
0.23395	-0.00459701	0.0148118	-0.0027772	-0.0070706	0.0057444	0.01508	0.0157729
0.234367	-0.00590831	0.0134334	-0.00387244	-0.00594556	0.00523776	0.0149086	0.0169426
0.234783	-0.00655651	0.012286	-0.00503473	-0.00557303	0.00458211	0.0146106	0.0178441
0.2352	-0.00682473	0.0119954	-0.00619702	-0.00541657	0.00409782	0.0148267	0.0178367
0.235617	-0.00716001	0.0126287	-0.00733696	-0.00461936	0.00402331	0.0155345	0.0166371
0.236033	-0.00769645	0.0132471	-0.00817515	-0.00343472	0.00375509	0.0167266	0.0155941
0.23645	-0.00842661	0.0133738	-0.00847131	-0.00216067	0.00306219	0.0183657	0.0156909
0.236867	-0.00939518	0.0134632	-0.00841543	-0.000908971	0.00272691	0.0196323	0.0156611
0.237283	-0.0101328	0.0139698	-0.00816397	-2.23517e-05	0.0031665	0.0203326	0.0141636
0.2377	-0.0103638	0.0147671	-0.00768341	-0.000290573	0.00423938	0.020422	0.0121221
0.238117	-0.0101849	0.0154004	-0.00707433	-0.00180304	0.00555813	0.0204071	0.0111908
0.238533	-0.009574	0.0161082	-0.00650994	-0.00337511	0.00688434	0.0199825	0.0108704
0.23895	-0.00865012	0.0177771	-0.00606291	-0.00427663	0.00789762	0.0184104	0.00996888
0.239367	-0.00749528	0.0201836	-0.00542589	-0.00460446	0.0083521	0.0158474	0.00958145
0.239783	-0.00628829	0.0220314	-0.00433065	-0.00427663	0.00856817	0.0132471	0.0109002
0.2402	-0.00491738	0.0220165	-0.00343658	-0.00303984	0.00909716	0.0110343	0.0134856
0.240617	-0.00359118	0.0204742	-0.00314601	-0.00142306	0.0101477	0.00873953	0.0158921
0.241033	-0.00303239	0.0186265	-0.00328012	-0.000439584	0.0116453	0.00664592	0.0174493
0.24145	-0.00307709	0.0167117	-0.00339188	0.000156462	0.0132769	0.00568479	0.0187606
0.241867	-0.00326335	0.0147149	-0.00313483	0.00112504	0.0144243	0.00611693	0.0199527
0.242283	-0.0031963	0.0127703	-0.00278838	0.00223517	0.0146255	0.00716746	0.0211373
0.2427	-0.00308454	0.0115931	-0.00233017	0.00309944	0.0138506	0.00853836	0.0222698
0.243117	-0.0031814	0.0112876	-0.00174344	0.00333786	0.0128523	0.0109449	0.0229627
0.243533	-0.0031814	0.0116825	-0.0013411	0.00263006	0.0120029	0.0137687	0.0229999
0.24395	-0.00300258	0.0122562	-0.00172667	0.000588596	0.0115409	0.0156462	0.0222772
0.244367	-0.00248104	0.0120476	-0.00340305	-0.00200421	0.0116527	0.0157952	0.0213608
0.244783	-0.00209361	0.0111833	-0.00547618	-0.00392646	0.0124872	0.0147745	0.0205189
0.2452	-0.00221282	0.0105128	-0.00687875	-0.00548363	0.0138283	0.0135079	0.0194535
0.245617	-0.00264496	0.011012	-0.00735931	-0.00682473	0.0145882	0.0118017	0.0181794
0.246033	-0.00272691	0.0122115	-0.00705756	-0.00745058	0.0141114	0.00984222	0.0173822
0.24645	-0.00260025	0.0130981	-0.0063926	-0.00688434	0.0125915	0.00843406	0.0178814
0.246867	-0.00310689	0.0139475	-0.00529736	-0.00602007	0.0108927	0.00824779	0.0189543
0.247283	-0.00462681	0.0151172	-0.00411831	-0.00591576	0.00943243	0.00887364	0.0200644
0.2477	-0.00641495	0.0160486	-0.0035204	-0.00621378	0.00811368	0.00948459	0.0209063
0.248117	-0.00760704	0.0156239	-0.00364892	-0.00618398	0.00685453	0.0101775	0.02148
0.248533	-0.00837445	0.0140816	-0.0045374	-0.00603497	0.00609457	0.011459	0.0214726
0.24895	-0.00873208	0.0126883	-0.00518002	-0.00645965	0.00602007	0.0133961	0.0206456
0.249367	-0.00829995	0.0119507	-0.00517443	-0.00730902	0.00634044	0.0157133	0.0194609
0.249783	-0.00713766	0.0116602	-0.00509061	-0.00794232	0.0063926	0.0178218	0.0181198
0.2502	-0.00604242	0.0122786	-0.00540912	-0.0077337	0.00563264	0.0188947	0.0169575
0.250617	-0.00561774	0.0141189	-0.00590086	-0.00666827	0.00462681	0.0189766	0.0160858
0.251033	-0.00539422	0.0164658	-0.00586174	-0.00488758	0.00388175	0.0182614	0.0157654
0.25145	-0.00485033	0.0185221	-0.0057444	-0.00298023	0.0032708	0.016816	0.0159368
0.251867	-0.00440329	0.0198781	-0.00603497	-0.00190735	0.00247359	0.0149757	0.016436
0.252283	-0.00429898	0.0202805	-0.00645407	-0.00202656	0.00222772	0.0139177	0.0173077
0.2527	-0.00434369	0.0191256	-0.00622496	-0.00362098	0.00361353	0.0151843	0.0182018
0.253117	-0.00397861	0.0167489	-0.00516884	-0.00649691	0.00628829	0.0176281	0.0188351
0.253533	-0.00336766	0.0141338	-0.00400096	-0.00959635	0.00863522	0.0194609	0.0189021
0.25395	-0.003241	0.0116676	-0.00323542	-0.0112057	0.00948459	0.0199601	0.0184551
0.254367	-0.00366569	0.00927597	-0.00309572	-0.0107363	0.0089854	0.0195131	0.0177324
0.254783	-0.00425428	0.0070855	-0.00352599	-0.00912696	0.00806898	0.0183061	0.016138
0.2552	-0.00450015	0.00564754	-0.00464357	-0.00763684	0.00759214	0.015527	0.0141636
0.255617	-0.00444055	0.00529736	-0.00654906	-0.0064373	0.00712275	0.0117943	0.0127479
0.256033	-0.00443309	0.00517815	-0.00846013	-0.0050962	0.00619888	0.0089407	0.0123158
0.25645	-0.00398606	0.00499189	-0.00938214	-0.00440329	0.00546128	0.00812858	0.0126585
0.256867	-0.00309944	0.00532717	-0.00923127	-0.00458956	0.00569969	0.00903755	0.013493
0.257283	-0.00230968	0.00645965	-0.00825897	-0.00504404	0.00583381	0.0107735	0.0149012
0.2577	-0.00175834	0.00754744	-0.00657141	-0.00467151	0.00487268	0.0129566	0.0163019
0.258117	-0.00155717	0.00744313	-0.00431947	-0.00363588	0.00360608	0.0150949	0.0168458
0.258533	-0.000946224	0.00742823	-0.00250898	-0.00326335	0.00362843	0.0164062	0.016734
0.25895	5.96046e-05	0.00848621	-0.00205636	-0.00317395	0.00461936	0.017032	0.0162348
0.259367	0.00122189	0.00973046	-0.0022687	-0.00303239	0.00562519	0.0174642	0.0153556
0.259783	0.00258535	0.00992417	-0.00232458	-0.00314415	0.00720471	0.0179037	0.014551
0.2602	0.0038147	0.0095889	-0.00218488	-0.00378489	0.00932813	0.0182018	0.0144392
0.260617	0.00476837	0.0105426	-0.00227429	-0.00451505	0.0112355	0.018768	0.0154302
0.261033	0.00479072	0.0127181	-0.00245869	-0.00444055	0.0116006	0.0197515	0.0169799
0.26145	0.00365078	0.0147298	-0.00255369	-0.00431389	0.010848	0.0204891	0.0186116
0.261867	0.00199676	0.0156537	-0.0025928	-0.0045374	0.0100434	0.020355	0.0200272
0.262283	0.00051409	0.0162646	-0.00284426	-0.00441819	0.00926852	0.019297	0.0210553
0.2627	-0.000938773	0.0173971	-0.00347011	-0.00353903	0.00861287	0.0178218	0.0212565
0.263117	-0.00239164	0.0186041	-0.004353	-0.00252575	0.00812113	0.0162646	0.0206977
0.263533	-0.00318885	0.0190139	-0.00533089	-0.00236183	0.00859797	0.0153482	0.0199154
0.26395	-0.00287592	0.0185296	-0.00583381	-0.00267476	0.010021	0.0152811	0.0191405
0.264367	-0.00184029	0.0182688	-0.00599027	-0.00265986	0.0111982	0.0155643	0.0182167
0.264783	-0.000797212	0.0183284	-0.00595115	-0.002563	0.011161	0.0159666	0.017412
0.2652	0.000506639	0.0180006	-0.00607967	-0.00255555	0.00981987	0.0170842	0.017643
0.265617	0.00219792	0.0168085	-0.00618584	-0.00227988	0.00809133	0.0191405	0.0183657
0.266033	0.00334531	0.0150502	-0.00591204	-0.00157207	0.00625104	0.0208691	0.0185594
0.26645	0.0032261	0.013493	-0.00539795	-0.000908971	0.00413507	0.0213534	0.0178441
0.266867	0.00215322	0.0125617	-0.00487827	-0.000931323	0.00235438	0.0210181	0.0169799
0.267283	0.000782311	0.0125393	-0.00445917	-0.00128895	0.00167638	0.0207052	0.0160262
0.2677	-0.000670552	0.0131801	-0.00368804	-0.00166148	0.00222772	0.0202209	0.0142828
0.268117	-0.00222027	0.0137314	-0.00268221	-0.00203401	0.00305474	0.0194311	0.0123307
0.268533	-0.00284612	0.0143498	-0.00172667	-0.00241399	0.00358373	0.0188574	0.0109673
0.26895	-0.00193715	0.0157431	-0.000977889	-0.00247359	0.00403822	0.0187904	0.0106767
0.269367	-0.000216067	0.0175536	-0.000463799	-0.00196695	0.00434369	0.0190064	0.0112578
0.269783	0.0013411	0.0184551	-0.000262633	-0.0012368	0.00414252	0.0193715	0.0123754
0.2702	0.00219047	0.0179708	-0.000374392	-0.000931323	0.00368804	0.0196397	0.0137463
0.270617	0.00210851	0.0169873	-0.000581145	-0.0013411	0.00374764	0.0192449	0.0148192
0.271033	0.000506639	0.0158101	-0.000927597	-0.00222027	0.0044927	0.018239	0.0157654
0.27145	-0.00230223	0.0137091	-0.00138022	-0.00362098	0.00548363	0.0174642	0.0170693
0.271867	-0.00466406	0.0111088	-0.00179373	-0.00557303	0.00616908	0.0176355	0.0186041
0.272283	-0.0057295	0.00976771	-0.00243075	-0.00777841	0.00647455	0.0179186	0.0198185
0.2727	-0.00584126	0.0100508	-0.00346452	-0.0096038	0.00600517	0.0175685	0.0205934
0.273117	-0.00537187	0.0111163	-0.00468828	-0.0108033	0.00472367	0.0168085	0.0213385
0.273533	-0.00412762	0.0122413	-0.00568293	-0.0112355	0.00330061	0.0158325	0.0214651
0.27395	-0.0019893	0.0134036	-0.00656582	-0.0113174	0.0025183	0.0146255	0.0200868
0.274367	-0.000119209	0.0145882	-0.0075046	-0.0113547	0.00289828	0.013493	0.0175983
0.274783	0.000394881	0.0150055	-0.00776164	-0.0110418	0.00441074	0.0132471	0.0149161
0.2752	-0.000365078	0.0148341	-0.00666641	-0.0100881	0.00642985	0.0140369	0.012435
0.275617	-0.00155717	0.0146329	-0.00440329	-0.00863522	0.00789016	0.0149906	0.0101998
0.276033	-0.00250339	0.0144392	-0.00188872	-0.00753254	0.00840425	0.0158623	0.00885129
0.27645	-0.00342727	0.0141412	6.70552e-05	-0.00591576	0.00827014	0.0171065	0.00873208
0.276867	-0.00448525	0.0132695	0.00132434	-0.00356138	0.00787526	0.0182241	0.00932068
0.277283	-0.00493973	0.0123605	0.00228547	-0.00183284	0.00704825	0.0185892	0.00999868
0.2777	-0.00409037	0.0118464	0.00290014	-0.00162423	0.00613183	0.0183582	0.0107735
0.278117	-0.00198185	0.0113919	0.00272133	-0.00257045	0.00581145	0.0182539	0.0109598
0.278533	0.000461936	0.0104755	0.00145286	-0.00361353	0.00619143	0.0182986	0.0105575
0.27895	0.00222027	0.00909716	-0.000391155	-0.00493973	0.00692159	0.0180006	0.0105351
0.279367	0.00314415	0.00827014	-0.00169314	-0.00582635	0.00765175	0.0176355	0.0113398
0.279783	0.00352412	0.00827014	-0.00272133	-0.00553578	0.00870973	0.0176504	0.0129938
0.2802	0.00346452	0.00875443	-0.00427477	-0.0045076	0.0106543	0.0179708	0.0148639
0.280617	0.00235438	0.00955164	-0.00642054	-0.0038892	0.0134259	0.0185817	0.016652
0.281033	-0.000290573	0.0108108	-0.00777282	-0.00388175	0.0158474	0.0190288	0.017643
0.28145	-0.00343472	0.0127479	-0.00729784	-0.00409037	0.0168532	0.0188351	0.0171438
0.281867	-0.00543892	0.0146031	-0.00602938	-0.00473857	0.016816	0.0179484	0.0159964
0.282283	-0.00599027	0.0156462	-0.00491738	-0.00550598	0.0168011	0.0170693	0.0148267
0.2827	-0.00566989	0.0153631	-0.00389479	-0.00602752	0.0170618	0.0171363	0.0136495
0.283117	-0.00466406	0.0140518	-0.00243634	-0.0058189	0.0171885	0.0181273	0.0127926
0.283533	-0.00289083	0.0129417	-0.000922009	-0.005126	0.0172704	0.0196919	0.0123754
0.28395	-0.00113994	0.0120699	-0.000340864	-0.00429898	0.0177324	0.0215471	0.0122562
0.284367	-0.000678003	0.0113249	-0.00086613	-0.00356138	0.0179783	0.0234172	0.0118986
0.284783	-0.00143051	0.0111908	-0.00224635	-0.00290573	0.0169873	0.0242516	0.0113621
0.2852	-0.00266731	0.0124276	-0.00387803	-0.0019595	0.0144914	0.0235289	0.0112355
0.285617	-0.00394881	0.014618	-0.00536442	-0.000715256	0.0112131	0.0216886	0.0113696
0.286033	-0.0050962	0.016056	-0.00670552	0.000454485	0.00844151	0.0198707	0.011906
0.28645	-0.00561774	0.016287	-0.00777841	0.00139326	0.00663102	0.0188202	0.0133961
0.286867	-0.00546873	0.0154749	-0.00828691	0.00244379	0.00576675	0.018172	0.0151098
0.287283	-0.00520051	0.0134036	-0.00780635	0.00323355	0.00584126	0.0177324	0.0159219
0.2877	-0.00532717	0.0103116	-0.00660494	0.00292063	0.00681728	0.0167415	0.0157356
0.288117	-0.00550598	0.00746548	-0.00550412	0.00116229	0.00829995	0.0151694	0.0161976
0.288533	-0.00520051	0.00622124	-0.00504591	-0.0012517	0.00920147	0.0139996	0.0174418
0.28895	-0.00469387	0.00664592	-0.00501797	-0.00330806	0.00899285	0.0139922	0.0181049
0.289367	-0.00406802	0.00840425	-0.00526383	-0.00469387	0.00847131	0.0147223	0.0178292
0.289783	-0.00353157	0.01093	-0.00574999	-0.00534207	0.00837445	0.0154451	0.0174344
0.2902	-0.00326335	0.0132099	-0.00626966	-0.00520796	0.00806898	0.0163838	0.0176802
0.290617	-0.00393391	0.0142977	-0.00619143	-0.00435859	0.0071004	0.0178367	0.0173822
0.291033	-0.00550598	0.0138357	-0.0053253	-0.0032708	0.00619143	0.018768	0.0167042
0.29145	-0.00656396	0.0121817	-0.00402331	-0.00235438	0.00648946	0.0181869	0.016652
0.291867	-0.00613183	0.00982732	-0.00257045	-0.00205636	0.00762939	0.0169575	0.0182614
0.292283	-0.00429898	0.00777096	-0.00114553	-0.00238419	0.00822544	0.0166297	0.0213459
0.2927	-0.00192225	0.00683218	4.47035e-05	-0.00311434	0.00847876	0.0177622	0.023596
0.293117	0.000528991	0.00712275	0.000396743	-0.00399351	0.0090003	0.0193939	0.0242591
0.293533	0.00274181	0.00820309	9.49949e-05	-0.00441819	0.0096038	0.020802	0.0238791
0.29395	0.00405312	0.00973046	-0.000474975	-0.00426173	0.00990927	0.0217855	0.0231042
0.294367	0.00423193	0.0118539	-0.00113435	-0.00368059	0.0101924	0.0218302	0.0216141
0.294783	0.00357628	0.0140369	-0.00202283	-0.00333786	0.0102594	0.0210404	0.0187382
0.2952	0.00282377	0.0158474	-0.00324659	-0.0032261	0.00944734	0.0198483	0.0159293
0.295617	0.00254065	0.017263	-0.00419654	-0.00271201	0.00778586	0.0188127	0.0142902
0.296033	0.00300258	0.0187829	-0.00461005	-0.0018701	0.00622869	0.0180453	0.0133514
0.29645	0.0038743	0.020504	-0.00471063	-0.00159442	0.0050813	0.0172481	0.0123084
0.296867	0.00435859	0.0212565	-0.00499003	-0.00242144	0.00385195	0.0168085	0.0106171
0.297283	0.00439584	0.0209212	-0.00550412	-0.00339747	0.00296533	0.0165924	0.00929087
0.2977	0.00412762	0.0200048	-0.00601821	-0.00350177	0.00341237	0.0167191	0.00911206
0.298117	0.0037998	0.0188351	-0.0063926	-0.00286847	0.00564009	0.0174642	0.0101402
0.298533	0.00349432	0.0175685	-0.00684522	-0.00207126	0.00881404	0.0183135	0.0118092
0.29895	0.00330061	0.0163466	-0.00725873	-0.00147521	0.0115037	0.0189021	0.0135005
0.299367	0.00343472	0.0157803	-0.00688992	-0.00119209	0.0128746	0.0193939	0.0156462
0.299783	0.00349432	0.0153705	-0.00534207	-0.0018552	0.013262	0.0197887	0.0178888
0.3002	0.0032112	0.0153035	-0.00325218	-0.00347942	0.0129342	0.0193343	0.0194833
0.300617	0.00231713	0.0160187	-0.00188313	-0.005126	0.0117794	0.0177026	0.0199154
0.301033	0.000476837	0.0166968	-0.0014808	-0.00625849	0.00981987	0.0161827	0.0193417
0.30145	-0.00210851	0.0161454	-0.00155345	-0.00663847	0.00821054	0.0163242	0.018321
0.301867	-0.00505149	0.0143722	-0.00201724	-0.00621378	0.00769645	0.0172555	0.0166148
0.302283	-0.00731647	0.0131354	-0.00286661	-0.00493228	0.00818074	0.0175536	0.0146627
0.3027	-0.00842661	0.0124425	-0.00346452	-0.00336021	0.00908971	0.0169873	0.0133216
0.303117	-0.00818074	0.0115409	-0.00314042	-0.00260025	0.0096634	0.0167266	0.0132471
0.303533	-0.00651926	0.0106469	-0.00212342	-0.00271201	0.00962615	0.0172332	0.0143573
0.30395	-0.00413507	0.0107437	-0.00130199	-0.00312179	0.00862777	0.0173151	0.0158846
0.304367	-0.0018552	0.011906	-0.000977889	-0.00360608	0.00751018	0.0164732	0.0174195
0.304783	-0.000491738	0.0130609	-0.00146404	-0.00374764	0.00641495	0.01546	0.0183061
0.3052	-0.000335276	0.0136793	-0.00302866	-0.00351667	0.0051111	0.0151023	0.0185966
0.305617	-0.00117719	0.0137091	-0.00526383	-0.00338256	0.00407547	0.0144243	0.0183359
0.306033	-0.00265986	0.0133514	-0.00716373	-0.00363588	0.00396371	0.012897	0.0177175
0.30645	-0.00419468	0.0128448	-0.00800751	-0.00409037	0.00499189	0.0115782	0.0173151
0.306867	-0.0051558	0.0124499	-0.00809133	-0.00399351	0.00642985	0.0117347	0.0174791
0.307283	-0.00516325	0.012368	-0.00743754	-0.0038892	0.00795722	0.0132397	0.0181124
0.3077	-0.00369549	0.0125691	-0.00598468	-0.00438839	0.00970066	0.0147671	0.0180304
0.308117	-0.00151992	0.0129864	-0.00425242	-0.00503659	0.0115186	0.0156984	0.016816
0.308533	0.000201166	0.0135303	-0.00278279	-0.00560284	0.0128597	0.0154078	0.0150055
0.30895	0.00105053	0.0141934	-0.00170432	-0.00622869	0.013195	0.0139549	0.0129566
0.309367	0.00140071	0.0149235	-0.000854954	-0.00737608	0.012286	0.0124723	0.0109598
0.309783	0.00179559	0.0150353	-0.000195578	-0.00824779	0.010699	0.0114143	0.00968576
0.3102	0.00179559	0.0140071	0.000145286	-0.00813603	0.00941753	0.0105649	0.00976771
0.310617	0.00147521	0.0119731	0.000642613	-0.00759214	0.00853092	0.0103414	0.0108108
0.311033	0.00089407	0.00987202	0.00136346	-0.00766665	0.0076443	0.0119582	0.0112802
0.31145	-6.70552e-05	0.00842661	0.00206195	-0.00847876	0.00693649	0.014849	0.0107586
0.311867	-0.00142306	0.0077486	0.00248104	-0.0089854	0.00678748	0.0165105	0.010021
0.312283	-0.00284612	0.00766665	0.00206754	-0.00888109	0.0070706	0.0163242	0.00987202
0.3127	-0.00353903	0.00797957	0.000899658	-0.00803173	0.00730902	0.0156388	0.0100955
0.313117	-0.00350922	0.0089407	-0.000849366	-0.00665337	0.00818074	0.0153482	0.0103116
0.313533	-0.00286847	0.0103191	-0.00262633	-0.00505149	0.0102818	0.0149235	0.0109226
0.31395	-0.00168383	0.0114888	-0.0038892	-0.00371784	0.012964	0.0143126	0.0118017
0.314367	-0.000245869	0.0114739	-0.00437535	-0.00286102	0.0151843	0.0144541	0.0126362
0.314783	0.00064075	0.0104159	-0.00400096	-0.00189245	0.0164062	0.0153258	0.0128672
0.3152	0.000685453	0.00925362	-0.00317395	-0.00122189	0.0170544	0.0166073	0.012584
0.315617	0.000506639	0.00858307	-0.00213459	-0.00133365	0.0167936	0.0176504	0.0118911
0.316033	0.000551343	0.00859052	-0.00108965	-0.00166893	0.0152439	0.0179633	0.011228
0.31645	0.000685453	0.0090003	-0.000201166	-0.00174344	0.0130236	0.0175685	0.0111684
0.316867	0.000841916	0.00979006	0.000284985	-0.00136346	0.0113547	0.0167638	0.0112429
0.317283	0.0012815	0.0107586	0.000262633	-0.00141561	0.0106096	0.0161827	0.0109002
0.3177	0.00149012	0.0119135	0.000111759	-0.00196695	0.0100285	0.0155717	0.0100657
0.318117	0.00077486	0.0127405	-0.000156462	-0.00198185	0.00920892	0.0150502	0.0096783
0.318533	-0.000685453	0.0125617	-0.000687316	-0.00152737	0.00871718	0.0151247	0.00970811
0.31895	-0.00228733	0.0111759	-0.00159256	-0.00102073	0.00885129	0.015527	0.00977516
0.319367	-0.0038892	0.00940263	-0.00261515	-0.00157207	0.00910461	0.0155866	0.00996143
0.319783	-0.00561029	0.00853092	-0.00317953	-0.00309199	0.00905991	0.0150204	0.0105128
0.3202	-0.00690669	0.00854582	-0.00348128	-0.00460446	0.00865012	0.0145137	0.0112653
0.320617	-0.00706315	0.00897795	-0.00389479	-0.00569969	0.00847876	0.014022	0.011526
0.321033	-0.00625849	0.00936538	-0.00467151	-0.00604987	0.00870228	0.0130311	0.0117272
0.32145	-0.00510365	0.00996143	-0.00569969	-0.0058189	0.00900775	0.0116602	0.0123084
0.321867	-0.00413507	0.010848	-0.00654906	-0.00493973	0.00919402	0.0106543	0.0129491
0.322283	-0.00366569	0.0118092	-0.00690669	-0.00370294	0.00922382	0.0103861	0.0133812
0.3227	-0.0038147	0.0128374	-0.00680052	-0.00302494	0.00938028	0.0101924	0.0133812
0.323117	-0.00429153	0.0138283	-0.00645965	-0.00315905	0.00939518	0.00987947	0.0129342
0.323533	-0.00377744	0.0146553	-0.00596233	-0.00342727	0.00877678	0.00973046	0.0116378
0.32395	-0.0019297	0.015147	-0.00525266	-0.00339001	0.00791997	0.0104234	0.0096783
0.324367	0.000499189	0.0150949	-0.00450946	-0.00332296	0.00753999	0.0117049	0.00788271
0.324783	0.0026077	0.0139326	-0.00425801	-0.003241	0.00842661	0.0129044	0.00658631
0.3252	0.00408292	0.0114813	-0.00440888	-0.00272691	0.0101179	0.0139922	0.00628829
0.325617	0.0051856	0.00850856	-0.00462681	-0.00168383	0.0114813	0.0152811	0.0071004
0.326033	0.00552833	0.00598282	-0.00440888	-0.000193715	0.0121742	0.0171214	0.00855327
0.32645	0.00479072	0.00450015	-0.00403449	0.000990927	0.0117645	0.0186786	0.0100434
0.326867	0.00347942	0.00439584	-0.00381656	0.000916421	0.0104681	0.019528	0.011228
0.327283	0.00263751	0.00544637	-0.00380538	-0.000968575	0.00879169	0.0200123	0.0122562
0.3277	0.00292808	0.00686944	-0.00383332	-0.0031665	0.00736117	0.0205189	0.0125989
0.328117	0.00353157	0.00805408	-0.00369362	-0.00439584	0.00698864	0.020802	0.0122339
0.328533	0.00331551	0.00881404	-0.00361539	-0.00595301	0.00741333	0.0204518	0.0121742
0.32895	0.00273436	0.00936538	-0.00369921	-0.00786781	0.00870973	0.0195801	0.0129938
0.329367	0.00249594	0.00967085	-0.00391714	-0.0083968	0.0105128	0.0184402	0.0139251
0.329783	0.00243634	0.00993908	-0.00367127	-0.00693649	0.0117794	0.016883	0.0137687
0.3302	0.00172854	0.0106618	-0.00271574	-0.0057891	0.0123382	0.0144318	0.0127405
0.330617	0.000372529	0.0117049	-0.00119023	-0.00665337	0.0124201	0.0118092	0.011608
0.331033	-0.000812113	0.0127926	0.00048615	-0.00799447	0.0127032	0.0104234	0.0107214
0.33145	-0.00171363	0.0133365	0.00231899	-0.00841171	0.0131354	0.0109151	0.00979006
0.331867	-0.00225007	0.0132099	0.0039842	-0.00847876	0.0131726	0.0128523	0.00904501
0.332283	-0.00241399	0.0130013	0.00467151	-0.00879169	0.0126362	0.0154674	0.00910461
0.3327	-0.00238419	0.0127181	0.00434183	-0.00902265	0.0113621	0.0182316	0.0103936
0.333117	-0.00233203	0.0121444	0.00354834	-0.00858307	0.00953674	0.0201687	0.012517
0.333533	-0.00252575	0.0115037	0.00271015	-0.00780076	0.00776351	0.0203401	0.0141934
0.33395	-0.00314415	0.0111312	0.00143051	-0.007689	0.0064373	0.0191778	0.0147671
0.334367	-0.00455976	0.0109002	-0.000335276	-0.0083223	0.00555068	0.0176728	0.0143945
0.334783	-0.00677258	0.0107139	-0.0020843	-0.0089705	0.00513345	0.016354	0.0138134
0.3352	-0.00864267	0.0110716	-0.00353716	-0.00896305	0.00525266	0.0154153	0.0128224
0.335617	-0.00935793	0.0118837	-0.00476651	-0.00879914	0.0058189	0.0150427	0.01131
0.336033	-0.00921637	0.0122488	-0.00563264	-0.00891089	0.00599027	0.0150949	0.0102371
0.33645	-0.0090152	0.0120327	-0.00569969	-0.00870973	0.00498444	0.0149086	0.0104085
0.336867	-0.00874698	0.0119582	-0.0052806	-0.00786036	0.00380725	0.0139624	0.01169
0.337283	-0.00781566	0.0118613	-0.00478886	-0.00672787	0.00353903	0.0128299	0.0129789
0.3377	-0.00697374	0.0116527	-0.00439771	-0.0057891	0.00376254	0.0124201	0.0140145
0.338117	-0.0070557	0.0123382	-0.00382215	-0.00464171	0.00341982	0.0129938	0.0153258
0.338533	-0.00735372	0.0143498	-0.00319071	-0.00371039	0.00247359	0.0138059	0.0165626
0.33895	-0.00666827	0.016652	-0.00317953	-0.00365824	0.00227988	0.0141636	0.0175238
0.339367	-0.00562519	0.0175536	-0.00325777	-0.00432879	0.00282377	0.0141636	0.01809
0.339783	-0.005804	0.0170544	-0.00252016	-0.00524521	0.00317395	0.0141785	0.0185072
0.3402	-0.00687689	0.0156388	-0.00089407	-0.00635535	0.00371784	0.0146776	0.018537
0.340617	-0.00753254	0.0133738	0.000329688	-0.00751018	0.00481307	0.0155717	0.017859
0.341033	-0.00759214	0.0108257	0.000257045	-0.0076592	0.00649691	0.0166744	0.017263
0.34145	-0.00776351	0.00860542	-0.000391155	-0.00622124	0.00837445	0.0176206	0.0166371
0.341867	-0.00746548	0.0076741	-0.00103377	-0.00427663	0.0101104	0.0181049	0.0158176
0.342283	-0.00578165	0.00810623	-0.00205636	-0.00303239	0.0116527	0.01809	0.0147298
0.3427	-0.0031963	0.00935048	-0.00358745	-0.00245869	0.0120774	0.0170916	0.0142977
0.343117	-0.00114739	0.0110492	-0.00484474	-0.0025779	0.0117719	0.0153109	0.0146106
0.343533	-0.000350177	0.0123456	-0.00516884	-0.00306964	0.0116453	0.0134781	0.0142604
0.34395	-0.000424683	0.0131354	-0.00473298	-0.00377744	0.0112727	0.0124872	0.0132322
0.344367	-0.00105798	0.0136718	-0.00410713	-0.00458211	0.00980496	0.0123903	0.0121891
0.344783	-0.00190735	0.0140965	-0.00319071	-0.00534952	0.00698119	0.0124499	0.0120327
0.3452	-0.00269711	0.0143945	-0.0018049	-0.00543147	0.00412017	0.0122935	0.0123829
0.345617	-0.0032559	0.0142157	-0.00054203	-0.00412762	0.00230223	0.0118315	0.0129193
0.346033	-0.00409782	0.0139698	-3.91155e-05	-0.00265241	0.00151247	0.0111759	0.0140443
0.34645	-0.00563264	0.0142157	-0.000435859	-0.0025183	0.00178814	0.0100508	0.0151992
0.346867	-0.00774115	0.0147	-0.00108406	-0.00336021	0.00283122	0.00902265	0.0160486
0.347283	-0.00989437	0.0151247	-0.00163168	-0.00368804	0.00406802	0.00888854	0.0161454
0.3477	-0.0118986	0.0154972	-0.00227988	-0.00360608	0.00549108	0.00945479	0.0156388
0.348117	-0.0137389	0.0160486	-0.00239722	-0.00406057	0.00683218	0.0101626	0.0142828
0.348533	-0.0147894	0.0165626	-0.00160932	-0.00482798	0.00736117	0.0112057	0.0120029
0.34895	-0.014618	0.0163317	-0.00016205	-0.00488013	0.00698864	0.0134781	0.00985712
0.349367	-0.0133589	0.0155568	0.000787899	-0.00428408	0.00662357	0.0164285	0.00850856
0.349783	-0.011526	0.0147372	0.000603497	-0.00394881	0.00730902	0.0181347	0.00821054
0.3502	-0.00959635	0.0139251	-0.000620261	-0.00401586	0.0082925	0.017643	0.00860542
0.350617	-0.00780076	0.0129864	-0.00243634	-0.00428408	0.00859797	0.0159219	0.00949204
0.351033	-0.00628829	0.0120625	-0.00378862	-0.00438094	0.00882149	0.01394	0.0107884
0.35145	-0.00504404	0.0121072	-0.00449829	-0.004448	0.00937283	0.0124052	0.0117421
0.351867	-0.00427663	0.013411	-0.00466593	-0.00435859	0.01017	0.0114515	0.0121444
0.352283	-0.00477582	0.0154004	-0.00431389	-0.0038296	0.0106692	0.0109226	0.0121146
0.3527	-0.00601262	0.0174791	-0.00311248	-0.00280142	0.010781	0.011161	0.0121742
0.353117	-0.00676513	0.0192821	-0.00149198	-0.00151247	0.0112206	0.0119507	0.0126213
0.353533	-0.00690669	0.0205636	-0.000564381	-0.000998378	0.0119209	0.0128746	0.0133216
0.35395	-0.00682473	0.0207722	-0.000296161	-0.00139326	0.0122339	0.0127777	0.0139326
0.354367	-0.00660121	0.0197142	0.00016205	-0.00210106	0.0116304	0.0111684	0.014253
0.354783	-0.0058189	0.0178888	0.00122935	-0.00254065	0.0104159	0.00979006	0.0146106
0.3552	-0.00481307	0.0158325	0.0024084	-0.00291318	0.00936538	0.00983477	0.015229
0.355617	-0.00413507	0.0137389	0.00317953	-0.00363588	0.00850856	0.0111237	0.016138
0.356033	-0.00338256	0.0119656	0.00340305	-0.00399351	0.0077486	0.0127181	0.0168756
0.35645	-0.00218302	0.0111014	0.00297278	-0.00341237	0.00751018	0.0136942	0.017494
0.356867	-0.000648201	0.0115708	0.00181049	-0.00210851	0.00828505	0.0142157	0.018537
0.357283	0.000908971	0.0129268	0.000100583	-0.000976026	0.01017	0.014089	0.0198036
0.3577	0.00204891	0.0145137	-0.00182167	-0.000521541	0.012435	0.0132322	0.0203997
0.358117	0.00265241	0.0160187	-0.00363216	-0.000536442	0.014253	0.0117943	0.0200793
0.358533	0.00288338	0.0171587	-0.00519119	-0.000804663	0.0154525	0.0101551	0.019446
0.35895	0.00270456	0.0171959	-0.0062082	-0.00100583	0.0160635	0.00891089	0.0190213
0.359367	0.0018999	0.0154302	-0.00665523	-0.000663102	0.0159517	0.0083074	0.0181571
0.359783	0.000528991	0.0124499	-0.00703521	0.000439584	0.0150204	0.00821054	0.0164434
0.3602	-0.000759959	0.00935793	-0.00753254	0.00144541	0.0141039	0.00835955	0.0148043
0.360617	-0.00162423	0.00689179	-0.00763312	0.0019297	0.0142008	0.00864267	0.0137165
0.361033	-0.00239909	0.00537932	-0.00672229	0.00222772	0.0152811	0.0090003	0.0134483
0.36145	-0.00280887	0.00533462	-0.00512414	0.00255555	0.0167191	0.00959635	0.0136197
0.361867	-0.00251085	0.00678003	-0.00363216	0.00236929	0.0177473	0.0103489	0.0137761
0.362283	-0.00151992	0.00844151	-0.00256486	0.00137091	0.0179112	0.0116155	0.0141636
0.3627	-0.000499189	0.0096038	-0.00209548	0.000737607	0.016734	0.0132099	0.0146404
0.363117	-0.000312924	0.0102744	-0.00248663	0.00100583	0.0140741	0.0145882	0.0150576
0.363533	-0.000655651	0.0108778	-0.00360981	0.00160932	0.0105724	0.0157654	0.0149757
0.36395	-0.0013411	0.0110865	-0.00480004	0.00222772	0.00685453	0.0171214	0.0146776
0.364367	-0.00204891	0.0107959	-0.00549853	0.00350177	0.00360608	0.0185445	0.0147372
0.364783	-0.00250339	0.0105649	-0.00556558	0.00565499	0.00140071	0.0187755	0.014782
0.3652	-0.00274181	0.0103787	-0.00511855	0.00763684	0.000923872	0.0176355	0.0144616
0.365617	-0.00263751	0.0103787	-0.00420771	0.00844151	0.0019148	0.0161752	0.0136793
0.366033	-0.00277907	0.0102967	-0.00305101	0.00821054	0.00339747	0.0152513	0.0128448
0.36645	-0.00305474	0.0100657	-0.00231899	0.00740588	0.00513345	0.0143051	0.0118837
0.366867	-0.00323355	0.00964105	-0.00202842	0.00616163	0.00734627	0.0132695	0.0108257
0.367283	-0.00326335	0.00919402	-0.00159256	0.00461936	0.00985712	0.0127926	0.0102669
0.3677	-0.00291318	0.00914931	-0.000480562	0.0032261	0.0113696	0.0132546	0.0104979
0.368117	-0.00236183	0.00940263	0.000569969	0.00274926	0.0113621	0.0141487	0.0116155
0.368533	-0.00164658	0.00981241	0.000944361	0.00315905	0.010632	0.0139773	0.0131205
0.36895	-0.00144541	0.0103116	0.00115112	0.00366569	0.00990927	0.0128224	0.0146255
0.369367	-0.00207871	0.0107214	0.00164844	0.00307709	0.00917167	0.0114515	0.0154153
0.369783	-0.00301003	0.0106841	0.0018999	0.00122189	0.00777841	0.0106618	0.0149831
0.3702	-0.00383705	0.0102893	0.00105053	-0.000834465	0.00590831	0.0103563	0.0138283
0.370617	-0.0045076	0.00981241	-0.000413507	-0.00223517	0.00424683	0.0104159	0.012286
0.371033	-0.00546873	0.00941008	-0.00183843	-0.0025183	0.00341237	0.0115708	0.0108704
0.37145	-0.00627339	0.00936538	-0.0031963	-0.00178814	0.00333786	0.0136495	0.00983477
0.371867	-0.00619888	0.00989437	-0.00439771	-5.21541e-05	0.00372529	0.0158846	0.00949949
0.372283	-0.0057444	0.0106841	-0.00507384	0.00215322	0.00458211	0.0172257	0.00973791
0.3727	-0.00546128	0.0108629	-0.00507384	0.00370294	0.00569969	0.0178665	0.00981987
0.373117	-0.00499934	0.0106692	-0.00453182	0.00397116	0.00658631	0.017859	0.00955164
0.373533	-0.00371039	0.0106916	-0.00347011	0.003241	0.00663847	0.0169203	0.00913441
0.37395	-0.00254065	0.0106916	-0.00159256	0.00234693	0.00581145	0.01546	0.00914186
0.374367	-0.00268221	0.0101551	0.000530854	0.00195205	0.0045225	0.0143126	0.00950694
0.374783	-0.00346452	0.00903755	0.00145286	0.00208616	0.00353157	0.0143945	0.0100583
0.3752	-0.00357628	0.00791997	0.000603497	0.00247359	0.00363588	0.0149161	0.0107959
0.375617	-0.00289083	0.00651926	-0.00104494	0.00266731	0.00511855	0.0150502	0.0120848
0.376033	-0.00226498	0.00482053	-0.00227429	0.00254065	0.00729412	0.0150949	0.0135675
0.37645	-0.00199676	0.00354648	-0.00296719	0.00234693	0.00917911	0.0155345	0.0139698
0.376867	-0.00192225	0.00337511	-0.00350364	0.00216812	0.0104085	0.0157282	0.013575
0.377283	-0.00240654	0.00412017	-0.00349246	0.00229478	0.0112355	0.0148863	0.0130162
0.3777	-0.00414252	0.00527501	-0.00215136	0.00317395	0.0122786	0.0132769	0.0123605
0.378117	-0.007011	0.00634044	-0.000156462	0.00526011	0.0136048	0.0120401	0.0107214
0.378533	-0.0096038	0.00675023	0.00107288	0.00810623	0.0148714	0.0115633	0.00818819
0.37895	-0.0106096	0.00638515	0.000771135	0.0107661	0.015676	0.011459	0.00609457
0.379367	-0.0103563	0.00540912	-0.000681728	0.0125691	0.0159517	0.0118762	0.00432879
0.379783	-0.0096485	0.00462681	-0.00219606	0.0132173	0.0154749	0.0127628	0.00284612
0.3802	-0.00877678	0.00442564	-0.0036601	0.0129417	0.0139624	0.0140667	0.00211597
0.380617	-0.0076741	0.00506639	-0.00516884	0.0118539	0.0114366	0.0149682	0.00274181
0.381033	-0.00654161	0.00660866	-0.00635348	0.00973791	0.00862777	0.014849	0.00429898
0.38145	-0.00582635	0.0083074	-0.00676699	0.00655651	0.0064373	0.0141561	0.00570715
0.381867	-0.00490248	0.00998378	-0.00634231	0.00313669	0.00500679	0.0131503	0.00698119
0.382283	-0.00357628	0.0117496	-0.00585057	0.000871718	0.00417978	0.0120923	0.00824779
0.3827	-0.00207126	0.0134259	-0.00533089	0.000357628	0.00412762	0.0108629	0.00967085
0.383117	-0.000797212	0.0145137	-0.00431947	0.000916421	0.00490993	0.0100881	0.010848
0.383533	-0.000327826	0.0147298	-0.00294484	0.0019297	0.00589341	0.0107288	0.0113323
0.38395	-0.000216067	0.0145659	-0.00183284	0.00344962	0.00623614	0.0120699	0.0113845
0.384367	-2.98023e-05	0.0140369	-0.00116229	0.00547618	0.00585616	0.013195	0.0113174
0.384783	0.000327826	0.0127256	-0.000609085	0.0070259	0.0057444	0.0134632	0.0112653
0.3852	0.000610948	0.0113249	-0.000122935	0.00695139	0.00603497	0.0136048	0.0105202
0.385617	0.00102818	0.0109375	-8.9407e-05	0.00555068	0.00612438	0.014253	0.00936538
0.386033	0.0018701	0.0119433	-0.000569969	0.00415742	0.00576675	0.0145212	0.00899285
0.38645	0.00251085	0.0138357	-0.000709668	0.0032261	0.00561029	0.0139177	0.0096187
0.386867	0.00218302	0.0160187	-0.00037998	0.00233948	0.00641495	0.0129193	0.0102818
0.387283	0.000998378	0.018172	2.79397e-05	0.00122189	0.00756979	0.0127554	0.0101402
0.3877	-0.000692904	0.0198558	0.000240281	0.000484288	0.008367	0.0131652	0.00987202
0.388117	-0.0025928	0.0204742	0.000307336	0.000789762	0.00873953	0.0128895	0.00965595
0.388533	-0.00412017	0.0202134	0.000178814	0.00214577	0.00886619	0.0116229	0.00852346
0.38895	-0.00494719	0.0194758	-0.000301749	0.00423193	0.00888854	0.0101551	0.00624359
0.389367	-0.00564009	0.0185594	-0.000815839	0.0063479	0.00882149	0.00896305	0.00441074
0.389783	-0.00633299	0.0179708	-0.000989065	0.00779331	0.00920892	0.00783056	0.004448
0.3902	-0.00659376	0.0179037	-0.000882894	0.0083819	0.00980496	0.00684708	0.0057891
0.390617	-0.00657141	0.0185966	-0.000832602	0.00868738	0.0101402	0.00692904	0.00733137
0.391033	-0.00684708	0.0198483	-0.000922009	0.00928342	0.0105351	0.00862777	0.00884384
0.39145	-0.00777841	0.0210628	-0.00172667	0.00993162	0.0111833	0.0109896	0.0107735
0.391867	-0.00816584	0.0220835	-0.00343099	0.00998378	0.0116453	0.0129193	0.0124499
0.392283	-0.00747293	0.0226796	-0.00525825	0.0100583	0.0107586	0.0141338	0.0127032
0.3927	-0.00566989	0.0221208	-0.00663288	0.0105873	0.00897795	0.014782	0.0116304
0.393117	-0.00356138	0.0199601	-0.0072699	0.0108778	0.00763684	0.0144318	0.0103265
0.393533	-0.00229478	0.016585	-0.00730902	0.0100806	0.00693649	0.012964	0.00950694
0.39395	-0.001885	0.0132993	-0.00664964	0.00856817	0.00631809	0.0115633	0.00861287
0.394367	-0.00207871	0.0110939	-0.00549294	0.00783801	0.00527501	0.0111535	0.00730902
0.394783	-0.00242889	0.00983477	-0.00450388	0.00800192	0.00463426	0.0114962	0.00623614
0.3952	-0.0031963	0.0096932	-0.00410154	0.00823289	0.00481307	0.0119507	0.00587106
0.395617	-0.00401586	0.0103787	-0.00433065	0.00829995	0.00525266	0.0121966	0.00593066
0.396033	-0.00388175	0.0114217	-0.0049118	0.00825524	0.00592321	0.0124872	0.00599027
0.39645	-0.00248849	0.012368	-0.00534207	0.00776351	0.0070408	0.0128597	0.00658631
0.396867	-0.00101328	0.0128895	-0.0052806	0.00630319	0.00930578	0.0132769	0.00797957
0.397283	-0.000581145	0.0132471	-0.00451505	0.0038296	0.0122413	0.0132993	0.00952184
0.3977	-0.000745058	0.0135824	-0.0028275	0.00105053	0.0147223	0.0128075	0.0103638
0.398117	-0.000953674	0.0144169	-0.000458211	-0.00136346	0.0160113	0.0126287	0.0108108
0.398533	-0.00111759	0.0157431	0.00167638	-0.00283867	0.0160709	0.0129864	0.0115708
0.39895	-0.00157207	0.0169873	0.00283867	-0.00310689	0.0160113	0.0132471	0.0123009
0.399367	-0.00164658	0.0177994	0.00290573	-0.00247359	0.0158697	0.0132099	0.0124574
0.399783	-0.000879169	0.0184029	0.00201166	-0.00157952	0.0149682	0.0135452	0.012368
0.4002	-0.00012666	0.0188053	0.000279397	-0.000543892	0.0130758	0.0147372	0.012219
0.400617	0.000141561	0.01809	-0.00212342	5.21541e-05	0.0110343	0.0160486	0.0115111
0.401033	5.96046e-05	0.016287	-0.00436418	-0.000402331	0.00944734	0.0168979	0.0103265
0.40145	2.98023e-05	0.0144765	-0.00596791	-0.00207871	0.00791252	0.017345	0.00988692
0.401867	-0.000320375	0.0132695	-0.00654347	-0.00425428	0.00669062	0.0172779	0.0105798
0.402283	-0.00118464	0.0122786	-0.00631437	-0.00541657	0.00642985	0.016883	0.011079
0.4027	-0.0018701	0.0112131	-0.00571646	-0.00489503	0.00722706	0.0166819	0.0110492
0.403117	-0.0018999	0.0111759	-0.00496768	-0.00248104	0.00829995	0.0167415	0.0111088
0.403533	-0.00125915	0.0124648	-0.00417978	0.000610948	0.00912696	0.0163838	0.0112578
0.40395	-0.00076741	0.014171	-0.00316277	0.00302494	0.00973046	0.0156611	0.0108331
0.404367	-0.000745058	0.0153929	-0.00240281	0.00423193	0.00981987	0.0151396	0.00983477
0.404783	-0.000834465	0.0159517	-0.00217371	0.00475347	0.00967085	0.014931	0.00942498
0.4052	-0.00104308	0.0165626	-0.00255369	0.00455231	0.00980496	0.014402	0.00949204
0.405617	-0.00154227	0.017345	-0.00327453	0.00312924	0.010334	0.0136867	0.00947714
0.406033	-0.00265986	0.0183657	-0.00395067	0.000908971	0.0106469	0.0134856	0.00949949
0.40645	-0.00349432	0.0191778	-0.00488944	-0.000834465	0.0101179	0.0135824	0.0096783
0.406867	-0.00348687	0.0191256	-0.00622496	-0.00112504	0.00923872	0.0139326	0.00951439
0.407283	-0.00356883	0.0184774	-0.00755489	-0.000610948	0.00838935	0.0140592	0.00878423
0.4077	-0.00394881	0.0176504	-0.00818632	-8.9407e-05	0.00731647	0.0139549	0.00865012
0.408117	-0.00396371	0.016585	-0.0078734	-0.000163913	0.00622869	0.0135377	0.00946224
0.408533	-0.00292808	0.014782	-0.00715256	-0.000625849	0.00618398	0.0128299	0.0101179
0.40895	-0.00184774	0.0125915	-0.00641495	-0.000841916	0.00802428	0.0124052	0.00981987
0.409367	-0.00166148	0.0118166	-0.0055097	-0.000715256	0.0109449	0.0122413	0.00944734
0.409783	-0.00130385	0.0131279	-0.00430271	-0.000484288	0.0136495	0.0130236	0.0096038
0.4102	-0.000178814	0.0151321	-0.00349805	-2.98023e-05	0.0156835	0.0143871	0.00917911
0.410617	0.000804663	0.0168383	-0.00353157	0.00111759	0.0173151	0.015676	0.00805408
0.411033	0.000678003	0.0181422	-0.00408478	0.00292808	0.0182092	0.0166968	0.00755489
0.41145	0.000342727	0.0192523	-0.00409596	0.00428408	0.0180081	0.0172034	0.00824779
0.411867	0.000759959	0.0195801	-0.00348687	0.00447035	0.0166148	0.0171959	0.00883639
0.412283	0.00140816	0.0185966	-0.00340305	0.00371039	0.0143945	0.0163317	0.00828505
0.4127	0.00157952	0.0173599	-0.00395067	0.00275671	0.0121295	0.0153631	0.00783056
0.413117	0.00152737	0.0161827	-0.00469387	0.00214577	0.0103116	0.0148639	0.00811368
0.413533	0.00203401	0.0151843	-0.00514649	0.00139326	0.0096634	0.0147671	0.00847876
0.41395	0.0025779	0.0143871	-0.00583939	0.000216067	0.00986457	0.014849	0.00825524
0.414367	0.00257045	0.0136569	-0.00698492	-0.000938773	0.0105798	0.0147671	0.00818074
0.414783	0.00165403	0.0129417	-0.00803545	-0.00175089	0.0116602	0.0147372	0.00915676
0.4152	8.9407e-05	0.0120401	-0.00846572	-0.00230223	0.0131056	0.0145882	0.0104085
0.415617	-0.00162423	0.0112802	-0.00805221	-0.00312924	0.0145286	0.0141263	0.0110865
0.416033	-0.00336021	0.011161	-0.00742078	-0.00380725	0.0147894	0.0130907	0.0110939
0.41645	-0.00470877	0.0115409	-0.00711903	-0.00356138	0.0136718	0.0114143	0.0109673
0.416867	-0.00528991	0.0121742	-0.00707433	-0.00272691	0.0120103	0.00993162	0.010848
0.417283	-0.00483543	0.0129193	-0.0063926	-0.0013262	0.010848	0.00952184	0.0100955
0.4177	-0.0038296	0.0136644	-0.00510737	0.000290573	0.00996888	0.0103191	0.00868738
0.418117	-0.00307709	0.0142083	-0.00425801	0.00155717	0.00928342	0.0118911	0.00721216
0.418533	-0.00295788	0.0141487	-0.00442564	0.00146031	0.00900775	0.013873	0.00579655
0.41895	-0.00290573	0.0135601	-0.00500679	-8.9407e-05	0.0089258	0.0158027	0.00414252
0.419367	-0.00246614	0.0130832	-0.00556	-0.00155717	0.00846386	0.0173002	0.00214577
0.419783	-0.001885	0.0131652	-0.00643171	-0.00251085	0.00779331	0.0176877	0.000700355
0.4202	-0.00166148	0.0136197	-0.00729226	-0.00350177	0.00812858	0.017114	0.000692904
0.420617	-0.0019595	0.0140518	-0.0072699	-0.00438839	0.00932068	0.016138	0.00141561
0.421033	-0.00246614	0.0141561	-0.00615232	-0.00408292	0.0103861	0.0149161	0.00207871
0.42145	-0.00331551	0.0140965	-0.00469387	-0.0025183	0.0109524	0.0142083	0.00280142
0.421867	-0.0044629	0.014022	-0.00339747	-0.00101328	0.0114143	0.0140667	0.00410527
0.422283	-0.00549108	0.0144169	-0.00229664	-0.000111759	0.0112951	0.0141338	0.00610203
0.4227	-0.00558793	0.0154749	-0.00192784	0.000528991	0.00967085	0.0141189	0.00759214
0.423117	-0.00461191	0.0167713	-0.00271574	0.00103563	0.0070706	0.0139847	0.00791997
0.423533	-0.00328571	0.0174195	-0.0041686	0.00128895	0.00471622	0.0137612	0.00766665
0.42395	-0.00209361	0.0170246	-0.00524148	0.00127405	0.00397116	0.0129268	0.00771135
0.424367	-0.00118464	0.0157505	-0.00555441	0.000797212	0.00507384	0.0113249	0.0082925
0.424783	-0.000551343	0.0136197	-0.00545382	-0.000625849	0.00719726	0.00976026	0.00865758
0.4252	-0.000432134	0.0112206	-0.00504591	-0.00274181	0.00952929	0.00886619	0.00891834
0.425617	-0.000588596	0.00919402	-0.00436418	-0.00432879	0.0116751	0.00840425	0.00993162
0.426033	-0.000558794	0.00859052	-0.00349246	-0.00485778	0.01394	0.00818074	0.0117347
0.42645	-0.000499189	0.00954419	-0.00298955	-0.00442564	0.0156611	0.00848621	0.0130981
0.426867	-0.00076741	0.0113621	-0.00321865	-0.00354648	0.0157952	0.0096038	0.0131056
0.427283	-0.00140816	0.0133812	-0.00387244	-0.0025928	0.0149235	0.0106767	0.012435
0.4277	-0.00179559	0.0151396	-0.00475533	-0.00173599	0.0139624	0.0106543	0.0115931
0.428117	-0.00172854	0.016734	-0.00581145	-0.00102818	0.0133067	0.0102744	0.0106245
0.428533	-0.0013411	0.0178218	-0.00699051	-0.00038743	0.0122786	0.0106245	0.00911951
0.42895	-0.00108778	0.0181198	-0.00748783	-0.000171363	0.01093	0.0114664	0.00814349
0.429367	-0.00100583	0.0181273	-0.00706315	-0.000663102	0.0100434	0.01131	0.00841171
0.429783	-0.000789762	0.0179783	-0.00655465	-0.00150502	0.00982732	0.0101775	0.00914186
0.4302	-0.000707805	0.0176728	-0.00630319	-0.00254065	0.0104085	0.0095591	0.00987947
0.430617	-0.00143796	0.0176653	-0.00596233	-0.0038445	0.0110194	0.00967085	0.0104681
0.431033	-0.00289828	0.0187457	-0.0053253	-0.0051558	0.011228	0.00988692	0.0112653
0.43145	-0.00409037	0.0208914	-0.0051856	-0.00610948	0.0107512	0.00989437	0.0117719
0.431867	-0.00456721	0.0229478	-0.00594556	-0.00627339	0.0101179	0.0107288	0.0115633
0.432283	-0.00437349	0.0247061	-0.00681728	-0.00631809	0.0101179	0.0126809	0.0110045
0.4327	-0.00418723	0.0261068	-0.00706315	-0.00604987	0.0101179	0.0145212	0.0103936
0.433117	-0.00412017	0.0261664	-0.00659935	-0.00513345	0.00967085	0.0156164	0.00976771
0.433533	-0.00486523	0.0241324	-0.00578351	-0.00386685	0.00876933	0.0163615	0.00921637
0.43395	-0.00638515	0.0211	-0.00493973	-0.00245124	0.0083074	0.017561	0.00902265
0.434367	-0.00745058	0.0184029	-0.00393391	-0.0012368	0.00865758	0.0189096	0.00953674
0.434783	-0.00776351	0.015907	-0.00262074	0.000238419	0.00882149	0.0194311	0.0107586
0.4352	-0.00689924	0.013724	-0.00122376	0.00134855	0.00821054	0.0187978	0.0119805
0.435617	-0.00541657	0.0132024	-0.000240281	0.0012964	0.00735372	0.017263	0.0128895
0.436033	-0.00356138	0.0156164	-0.000139698	-2.98023e-05	0.00740588	0.0155866	0.0135601
0.43645	-0.00204891	0.019446	-0.000502914	-0.0019893	0.00818074	0.0141561	0.0139251
0.436867	-0.0018999	0.0227392	-0.000804663	-0.00356138	0.00818819	0.0126138	0.0135154
0.437283	-0.00232458	0.0246838	-0.000944361	-0.00452995	0.00706315	0.0109971	0.0118315
0.4377	-0.0026077	0.0252947	-0.00124611	-0.00488758	0.0064522	0.00991672	0.00947714
0.438117	-0.00221282	0.0243708	-0.00163168	-0.00499934	0.00748783	0.0100061	0.00732392
0.438533	-0.00145286	0.0215471	-0.00161491	-0.00497699	0.00903755	0.0104308	0.00569224
0.43895	-0.000581145	0.0179783	-0.00128523	-0.00497699	0.00984222	0.0104457	0.00427663
0.439367	0.000275671	0.0154451	-0.00103936	-0.00510365	0.0106618	0.0104681	0.0026226
0.439783	0.000357628	0.0146106	-0.0011567	-0.00506639	0.0123233	0.0108778	0.00143796
0.4402	-0.000745058	0.014402	-0.00127964	-0.00442564	0.0134259	0.0114888	0.00147521
0.440617	-0.002563	0.0144169	-0.00154786	-0.00288338	0.0126734	0.0116527	0.00220537
0.441033	-0.0037998	0.0145882	-0.00235811	-0.00104308	0.0110641	0.0114888	0.00289828
0.44145	-0.00385195	0.0148937	-0.00349246	0.000216067	0.0101551	0.0109226	0.00368059
0.441867	-0.00309944	0.0146404	-0.00458211	0.000320375	0.00949204	0.0100061	0.00507384
0.442283	-0.00219047	0.0137463	-0.00511296	-0.000722706	0.00856072	0.00909716	0.0064671
0.4427	-0.00180304	0.0131577	-0.00509061	-0.00274181	0.00789762	0.00882894	0.00700355
0.443117	-0.0019744	0.0124946	-0.004448	-0.00508875	0.00816584	0.00941008	0.00737608
0.443533	-0.002563	0.0117347	-0.00321306	-0.00684708	0.00890344	0.0103265	0.00817329
0.44395	-0.00303239	0.0110418	-0.00177138	-0.00755489	0.00896305	0.0112504	0.00933558
0.444367	-0.00288338	0.0107884	-0.000223517	-0.00697374	0.00806898	0.011459	0.010483
0.444783	-0.00216067	0.0111908	0.000938773	-0.00560284	0.00669807	0.0113919	0.0121668
0.4452	-0.00076741	0.0119358	0.00129081	-0.00405312	0.0057444	0.0111908	0.0143126
0.445617	0.000543892	0.0131428	0.000620261	-0.00296533	0.00570715	0.0107512	0.0155494
0.446033	0.000931323	0.0143647	-0.000944361	-0.0025928	0.00660121	0.0100955	0.0152141
0.44645	0.000439584	0.0149608	-0.0025481	-0.00225007	0.00844151	0.00958145	0.0139549
0.446867	6.70552e-05	0.0146255	-0.00401773	-0.00170618	0.0110343	0.0106245	0.0132024
0.447283	-2.98023e-05	0.0137314	-0.00518002	-0.00133365	0.0134557	0.0127554	0.0125021
0.4477	-0.000678003	0.0127628	-0.00591204	-0.00157952	0.0148043	0.0146702	0.0110492
0.448117	-0.00154227	0.0119954	-0.00616349	-0.00210851	0.0146329	0.0158772	0.00946224
0.448533	-0.00178814	0.011526	-0.00545382	-0.00214577	0.0132471	0.016585	0.00870228
0.44895	-0.00170618	0.0118166	-0.00421889	-0.00242889	0.0114888	0.0170842	0.00866502
0.449367	-0.00280142	0.013344	-0.00290573	-0.00365824	0.00984967	0.0165924	0.00802428
0.449783	-0.00470877	0.0152737	-0.00204518	-0.00547618	0.00858307	0.0147074	0.00692904
0.4502	-0.00582635	0.0168532	-0.00182167	-0.00672042	0.0076592	0.0123829	0.00666082
0.450617	-0.00593066	0.0175536	-0.00195578	-0.00727177	0.00719726	0.0104606	0.00753999
0.451033	-0.00548363	0.0172779	-0.00238605	-0.0077486	0.00722706	0.00956654	0.00859052
0.45145	-0.0051111	0.0163019	-0.00266544	-0.00804663	0.00724942	0.0096038	0.00902265
0.451867	-0.00465661	0.0149086	-0.00265427	-0.00800937	0.0070408	0.0105426	0.00959635
0.452283	-0.00401586	0.0136495	-0.00252016	-0.00725687	0.0071153	0.0124499	0.0106022
0.4527	-0.00331551	0.012368	-0.00218488	-0.00623614	0.00775605	0.0143871	0.0111759
0.453117	-0.00242144	0.0110716	-0.00159256	-0.00505149	0.00856072	0.0155568	0.0106245
0.453533	-0.00216812	0.0107437	-0.00112317	-0.00426173	0.00890344	0.0156835	0.00948459
0.45395	-0.00275671	0.0116304	-0.00140816	-0.00441074	0.00847131	0.0154898	0.00911951
0.454367	-0.00404567	0.0128224	-0.00216253	-0.00520051	0.00778586	0.0151098	0.00968576
0.454783	-0.00583381	0.0130609	-0.00290573	-0.0064075	0.00682473	0.0144169	0.0102967
0.4552	-0.00815093	0.0126138	-0.00378862	-0.00716001	0.00561774	0.0138059	0.0104383
0.455617	-0.0108257	0.0126511	-0.00496768	-0.00712275	0.00442564	0.0137314	0.0105947
0.456033	-0.0124797	0.0128895	-0.00591204	-0.0064671	0.00339747	0.0144169	0.0111535
0.45645	-0.0125617	0.0122711	-0.00628084	-0.00505894	0.00304729	0.0147223	0.0115037
0.456867	-0.0110492	0.0106469	-0.00663847	-0.00315905	0.00333786	0.0142828	0.0110492
0.457283	-0.00870973	0.009574	-0.00720285	-0.00151247	0.00382215	0.013724	0.0107139
0.4577	-0.00607222	0.0102445	-0.00749342	-0.00120699	0.00401586	0.0139326	0.0111982
0.458117	-0.0032112	0.0118986	-0.00735372	-0.00264496	0.00391155	0.0149161	0.0118911
0.458533	-0.000812113	0.013411	-0.00709668	-0.00484288	0.00406057	0.0156388	0.0118688
0.45895	0.00064075	0.0145063	-0.00677258	-0.00698864	0.00437349	0.016354	0.0107065
0.459367	0.000663102	0.0154674	-0.00616908	-0.00856072	0.00459701	0.0172406	0.00885874
0.459783	-0.000558794	0.0161529	-0.0055097	-0.00894815	0.00506639	0.0177026	0.00679493
0.4602	-0.00198185	0.0164807	-0.00500679	-0.00802428	0.00579655	0.0170022	0.00549853
0.460617	-0.0031665	0.0162348	-0.00453182	-0.00593066	0.00647455	0.0152215	0.00540912
0.461033	-0.00426173	0.01546	-0.00419095	-0.0032261	0.00685453	0.0137165	0.0064373
0.46145	-0.00546128	0.0146255	-0.00416301	-0.000417233	0.00713766	0.0124723	0.00835955
0.461867	-0.00635535	0.0144765	-0.00459887	0.00198185	0.00745803	0.0113025	0.0104532
0.462283	-0.00628829	0.0148863	-0.00482239	0.00321865	0.00739843	0.0103489	0.0113919
0.4627	-0.00585616	0.0141561	-0.00448152	0.00301748	0.00713021	0.0101626	0.0104085
0.463117	-0.00576675	0.0123531	-0.00381656	0.00134855	0.00678003	0.0111908	0.00879914
0.463533	-0.00546128	0.0105053	-0.00335276	-0.000685453	0.00627339	0.0127554	0.00769645
0.46395	-0.00391155	0.0095591	-0.00331923	-0.0019893	0.00567734	0.0144914	0.00727177
0.464367	-0.00158697	0.00928342	-0.0033807	-0.00224262	0.00484288	0.0167042	0.00700355
0.464783	0.000193715	0.00931323	-0.00329688	-0.00199676	0.00377744	0.0197664	0.00733137
0.4652	0.000990927	0.0105575	-0.00330806	-0.00163168	0.00268966	0.0226572	0.00881404
0.465617	0.0012368	0.0125542	-0.00345893	-0.000745058	0.00216067	0.024043	0.0107139
0.466033	0.00119209	0.0145808	-0.00337511	2.98023e-05	0.0025332	0.0240281	0.0123382
0.46645	0.000521541	0.0154153	-0.00271574	-0.000320375	0.00330061	0.0234842	0.0131652
0.466867	-0.000447035	0.0144541	-0.00127405	-0.00193715	0.0045225	0.0219941	0.0138059
0.467283	-0.00115484	0.0123754	0.000223517	-0.00308454	0.00637025	0.0192523	0.0144169
0.4677	-0.00145286	0.00991672	0.00106171	-0.00227243	0.00803918	0.0163987	0.0147372
0.468117	-0.00137836	0.0083819	0.00125728	-0.000298023	0.00850856	0.0146478	0.0146031
0.468533	-0.00127405	0.00789016	0.00123493	0.00104308	0.00749528	0.0134185	0.0140443
0.46895	-0.00157952	0.00837445	0.00113994	0.00110269	0.00531226	0.0118911	0.0136122
0.469367	-0.00261515	0.00953674	0.000229105	0.000707805	0.00232458	0.0108778	0.0129119
0.469783	-0.00414997	0.0107139	-0.00138581	0.000499189	-0.000685453	0.0109896	0.0119135
0.4702	-0.00567734	0.0120476	-0.00267103	0.00013411	-0.00204146	0.0120252	0.0109673
0.470617	-0.00716001	0.0131279	-0.00305101	-0.000678003	-0.00144541	0.0135154	0.0106394
0.471033	-0.00890344	0.0138134	-0.00295602	-0.00103563	-0.000156462	0.0157431	0.0107735
0.47145	-0.0106171	0.0138879	-0.00316836	0.00013411	0.00142306	0.0187382	0.0106469
0.471867	-0.0116602	0.0140741	-0.00368245	0.00227243	0.0032112	0.0217184	0.0104755
0.472283	-0.0120103	0.0154302	-0.00461563	0.00397116	0.00460446	0.0236183	0.0109598
0.4727	-0.0115931	0.0179857	-0.00587292	0.004448	0.00433624	0.0238344	0.0119656
0.473117	-0.0105426	0.0211	-0.00730902	0.00438839	0.00282377	0.0224337	0.012368
0.473533	-0.00885874	0.0230819	-0.0080578	0.00416488	0.00178069	0.0202432	0.0119582
0.47395	-0.00698864	0.023365	-0.00739284	0.00298023	0.00144541	0.0180751	0.0118688
0.474367	-0.00566244	0.0224561	-0.00573881	0.000841916	0.00167638	0.0158474	0.0125989
0.474783	-0.00478327	0.0212789	-0.00371598	-0.00152737	0.0025183	0.0140145	0.0132471
0.4752	-0.00412017	0.019744	-0.00202283	-0.00332296	0.0038594	0.0130162	0.0126064
0.475617	-0.00280887	0.0175983	-0.00107847	-0.00461936	0.00499934	0.012897	0.0108778
0.476033	-0.000745058	0.0163615	-0.00137463	-0.00597537	0.00549853	0.0126958	0.00893325
0.47645	0.00146031	0.0173897	-0.0027772	-0.00695884	0.00607967	0.0121072	0.00725687
0.476867	0.00359863	0.0199303	-0.00401773	-0.00679493	0.00669807	0.0120401	0.00599772
0.477283	0.00564009	0.0221133	-0.00440888	-0.0057444	0.00680983	0.0127777	0.00479072
0.4777	0.00707805	0.0228658	-0.00423565	-0.00470877	0.00689924	0.0141636	0.00441074
0.478117	0.00690669	0.0224933	-0.00412948	-0.00458211	0.0077486	0.0153109	0.00551343
0.478533	0.00558793	0.021264	-0.00410713	-0.00465661	0.00870228	0.0156984	0.00759959
0.47895	0.00484288	0.0192598	-0.00394508	-0.00450015	0.00863522	0.0153705	0.00923127
0.479367	0.00498444	0.0172853	-0.00408478	-0.00493228	0.00799447	0.0151768	0.0102669
0.479783	0.00485778	0.0156462	-0.00454299	-0.00610948	0.00793487	0.0155866	0.0119954
0.4802	0.00373274	0.0143275	-0.00498444	-0.00743568	0.00827014	0.0157431	0.0141039
0.480617	0.00200421	0.0135452	-0.00479445	-0.007689	0.00769645	0.01546	0.0151619
0.481033	-2.23517e-05	0.01394	-0.00407361	-0.0070259	0.00630319	0.0155419	0.015147
0.48145	-0.00285357	0.0156462	-0.00334159	-0.00626594	0.00470132	0.016138	0.0156984
0.481867	-0.00628829	0.0173524	-0.00263192	-0.00566244	0.00298023	0.0162721	0.0169128
0.482283	-0.00904501	0.0177398	-0.00203401	-0.00506639	0.000841916	0.0156015	0.0176132
0.4827	-0.00995398	0.0170916	-0.00158139	-0.00426173	-0.00193715	0.0150725	0.0176951
0.483117	-0.00885129	0.0159293	-0.00153668	-0.00339001	-0.00412017	0.0151247	0.0182763
0.483533	-0.00678003	0.0139698	-0.00191666	-0.00291318	-0.00505894	0.0149533	0.0195578
0.48395	-0.0045225	0.0112727	-0.00271574	-0.0025928	-0.00463426	0.0142455	0.0201464
0.484367	-0.00260025	0.00850856	-0.00385009	-0.00208616	-0.003241	0.0135303	0.0190511
0.484783	-0.00156462	0.00690669	-0.00490062	-0.00118464	-0.000841916	0.0130087	0.0170767
0.4852	-0.00163913	0.00621378	-0.00548735	-0.000678003	0.00296533	0.0127107	0.0159666
0.485617	-0.00263006	0.00570715	-0.00568293	-0.00119954	0.0070706	0.013046	0.0163689
0.486033	-0.0038147	0.00549853	-0.00588968	-0.00209361	0.0100285	0.0142306	0.0170022
0.48645	-0.00465661	0.00560284	-0.00614673	-0.00310689	0.0113249	0.0155717	0.0171587
0.486867	-0.00474602	0.00614673	-0.00626408	-0.00394136	0.011161	0.016138	0.0179633
0.487283	-0.00385195	0.00663847	-0.00601821	-0.00485778	0.00981241	0.0159442	0.0199527
0.4877	-0.00236929	0.00746548	-0.00538677	-0.00507384	0.00751764	0.0152066	0.0217482
0.488117	-0.00101328	0.00911206	-0.00420213	-0.00412762	0.00476837	0.0140369	0.0217408
0.488533	-0.000692904	0.010848	-0.0025481	-0.00254065	0.00251085	0.0129268	0.0207648
0.48895	-0.00153482	0.0116676	-0.000827014	-0.000678003	0.00142306	0.0125766	0.0199527
0.489367	-0.00304729	0.0109598	0.00048615	0.00051409	0.00180304	0.0135824	0.0190362
0.489783	-0.00434369	0.0096038	0.00117347	0.00064075	0.00279397	0.0151247	0.0175759
0.4902	-0.00495464	0.00860542	0.00123493	-0.000625849	0.00365824	0.0160262	0.0158101
0.490617	-0.0051856	0.00809878	0.000748783	-0.00280142	0.00456721	0.0162348	0.0139698
0.491033	-0.00506639	0.00821799	3.35276e-05	-0.00479072	0.00542402	0.0161529	0.0120997
0.49145	-0.00513345	0.00886619	-0.000558794	-0.00627339	0.00573695	0.0157729	0.0106171
0.491867	-0.00541657	0.0107065	-0.000642613	-0.00689924	0.0050962	0.0145286	0.0096038
0.492283	-0.00588596	0.0140518	-0.00013411	-0.00654161	0.00388175	0.0133365	0.00834465
0.4927	-0.00605732	0.017345	0.000916421	-0.00543892	0.00240654	0.0137165	0.0063926
0.493117	-0.00556558	0.0189021	0.00212342	-0.00427663	0.00108778	0.0149757	0.00470877
0.493533	-0.00478327	0.0185743	0.00331365	-0.0038445	0.000603497	0.0157431	0.00375509
0.49395	-0.00362843	0.0182688	0.00466593	-0.00389665	0.000916421	0.0160635	0.00318885
0.494367	-0.00233203	0.0187308	0.00566617	-0.00368804	0.00140071	0.017263	0.00294298
0.494783	-0.00140071	0.0184998	0.00585057	-0.00301748	0.00183284	0.0192896	0.0032261
0.4952	-0.00160188	0.0173897	0.00541471	-0.00210106	0.00218302	0.0205189	0.00396371
0.495617	-0.00231713	0.0171363	0.00482239	-0.00109523	0.00268221	0.0203922	0.00487268
0.496033	-0.00255555	0.0187531	0.00386685	-0.000543892	0.00331551	0.0196695	0.00603497
0.49645	-0.00192225	0.0208244	0.00224076	-0.000327826	0.00412017	0.0190958	0.00757724
0.496867	-0.000692904	0.021711	0.000910833	-0.000432134	0.00513345	0.0182092	0.00916421
0.497283	0.000447035	0.0214428	0.00048615	-0.000588596	0.00598282	0.016585	0.0104755
0.4977	0.00101328	0.0210181	0.000525266	-0.000283122	0.00674278	0.0142828	0.0118241
0.498117	-7.45058e-06	0.0202954	0.00083819	0.000692904	0.00748783	0.0121519	0.0130311
0.498533	-0.00248849	0.0186637	0.00187755	0.002563	0.00812858	0.0109002	0.0138655
0.49895	-0.00505149	0.0160187	0.00358745	0.00426918	0.00852346	0.0104681	0.0141561
0.499367	-0.00678003	0.012897	0.00505149	0.00482053	0.00826269	0.0102818	0.0142083
0.499783	-0.00748038	0.0107288	0.00577234	0.00406802	0.00765175	0.0096485	0.0146627
0.5002	-0.00722706	0.0096187	0.00583381	0.00233203	0.00753999	0.00893325	0.0155643
0.500617	-0.0057146	0.0090301	0.00527501	0.00012666	0.00747293	0.00888854	0.0164434
0.501033	-0.00355393	0.00914186	0.00431389	-0.00158697	0.00613183	0.0096187	0.0167117
0.50145	-0.00231713	0.0102594	0.00357628	-0.00190735	0.00365824	0.0105426	0.0167042
0.501867	-0.0025928	0.0121593	0.00316836	-0.000782311	0.00207871	0.0110567	0.0164658
0.502283	-0.00370294	0.0135601	0.00268221	0.000886619	0.00292063	0.0107586	0.0154898
0.5027	-0.005126	0.0142977	0.00221282	0.00228733	0.00452995	0.0096932	0.0135899
0.503117	-0.00692159	0.0148937	0.00204518	0.00353903	0.00543892	0.00824779	0.0115633
0.503533	-0.00806898	0.0149384	0.00213459	0.00450015	0.00619143	0.00692159	0.0102744
0.50395	-0.00810623	0.0143126	0.00216812	0.00496954	0.00736117	0.00583381	0.00941753
0.504367	-0.00751018	0.0135303	0.0024084	0.00459701	0.00815093	0.00531226	0.00911951
0.504783	-0.00739843	0.0130832	0.00325777	0.00372529	0.00684708	0.00629574	0.00978261
0.5052	-0.00758469	0.0129491	0.00419095	0.00323355	0.00415742	0.00888109	0.0113547
0.505617	-0.0071153	0.0127256	0.00471622	0.00303984	0.0018999	0.0115782	0.0133514
0.506033	-0.00620633	0.0125393	0.00505708	0.00261515	0.000856817	0.0129417	0.0155047
0.50645	-0.00490993	0.0123531	0.00515208	0.0018552	0.000789762	0.0128224	0.0182986
0.506867	-0.00377744	0.0117719	0.00449829	0.00131875	0.00112504	0.0117198	0.0211746
0.507283	-0.00243634	0.0111908	0.00321865	0.00143796	0.00199676	0.00990927	0.0230968
0.5077	-0.00119954	0.0107661	0.00237487	0.00160932	0.00298023	0.0083074	0.0230744
0.508117	-0.000864267	0.0108331	0.00261515	0.0019595	0.00376254	0.00818819	0.0214055
0.508533	-0.00213832	0.0113696	0.00281632	0.00301748	0.00435859	0.00952929	0.0194833
0.50895	-0.00478327	0.0120997	0.00259839	0.00435859	0.00473857	0.0113621	0.0178143
0.509367	-0.00740588	0.0133812	0.00257045	0.00590831	0.00458956	0.0130832	0.0168011
0.509783	-0.00979751	0.0145286	0.00315718	0.00749528	0.00335276	0.0147298	0.0165477
0.5102	-0.0116527	0.0149757	0.00407919	0.00891089	0.00165403	0.0161156	0.0177324
0.510617	-0.0123158	0.0145361	0.00466034	0.00932068	0.000305474	0.0164956	0.0198558
0.511033	-0.0114962	0.0135228	0.00538677	0.00835955	-0.000394881	0.0159442	0.0209659
0.51145	-0.0103414	0.0129715	0.00642613	0.0071004	-0.000447035	0.0150651	0.0202507
0.511867	-0.00954419	0.0131056	0.00739284	0.00594556	0.000119209	0.0141487	0.0179708
0.512283	-0.00825524	0.0138283	0.00748783	0.00487268	0.00146776	0.0133738	0.0151619
0.5127	-0.00660121	0.0146702	0.00640377	0.00434369	0.00367314	0.0122115	0.0120923
0.513117	-0.00616908	0.0152141	0.00473298	0.00472367	0.00590831	0.0110567	0.00949204
0.513533	-0.00753254	0.0156835	0.0031516	0.00569969	0.00751764	0.0106618	0.00845641
0.51395	-0.00914931	0.0160486	0.00198372	0.00657886	0.00779331	0.0114664	0.00872463
0.514367	-0.0096932	0.0161305	0.00124611	0.00700355	0.00729412	0.0133887	0.00929832
0.514783	-0.0100285	0.0164211	0.00120699	0.00701845	0.00719726	0.0155494	0.0096485
0.5152	-0.011228	0.0173599	0.00182726	0.0063628	0.00727177	0.017941	0.0100955
0.515617	-0.012435	0.0189692	0.00276603	0.00538677	0.00732392	0.020057	0.0105724
0.516033	-0.0121891	0.0204891	0.0034254	0.00496209	0.00753999	0.0215322	0.0106096
0.51645	-0.0103116	0.0211447	0.00355393	0.00492483	0.00883639	0.0223368	0.0103787
0.516867	-0.0083521	0.0206381	0.00350364	0.00488013	0.0106394	0.0226721	0.0102296
0.517283	-0.00731647	0.0187084	0.00361539	0.00451505	0.0114664	0.0228286	0.0107363
0.5177	-0.00665337	0.0161082	0.00412948	0.00405312	0.0108108	0.0220835	0.0119209
0.518117	-0.00588596	0.0135824	0.00485592	0.00359118	0.00907481	0.0206456	0.0135377
0.518533	-0.00552833	0.0119433	0.00570528	0.00275671	0.00662357	0.0190884	0.015229
0.51895	-0.00661612	0.0112355	0.00662729	0.00171363	0.00353903	0.0176653	0.0166968
0.519367	-0.00881404	0.0110716	0.00702403	0.000752509	0.000558794	0.0163019	0.0181273
0.519783	-0.0103861	0.0109822	0.00656582	0.000484288	-0.0013411	0.0151172	0.0187159
0.5202	-0.0102147	0.0112653	0.00571087	0.000923872	-0.00161678	0.0152513	0.0185594
0.520617	-0.00899285	0.0129491	0.00537559	0.00134855	-0.000402331	0.0169203	0.0181422
0.521033	-0.00820309	0.0153258	0.00567175	0.00116229	0.00141561	0.018619	0.0178665
0.52145	-0.00819564	0.0173151	0.00587292	0.000298023	0.00286847	0.0192672	0.0175387
0.521867	-0.00813603	0.0182092	0.00602379	-0.000499189	0.00373274	0.0186116	0.0164136
0.522283	-0.00746548	0.0189617	0.00644848	-0.000752509	0.00444055	0.0169501	0.0151843
0.5227	-0.00669807	0.0196174	0.00705756	-0.000484288	0.00494719	0.014469	0.0143051
0.523117	-0.00635535	0.0183806	0.0074096	0.000312924	0.00480562	0.0114813	0.0136942
0.523533	-0.00600517	0.0150651	0.00731461	0.00169128	0.00451505	0.00919402	0.0129119
0.52395	-0.0051409	0.0109822	0.00749342	0.00402331	0.00516325	0.00858307	0.0115186
0.524367	-0.0038445	0.00823289	0.00814162	0.00695139	0.00663847	0.00939518	0.0101253
0.524783	-0.0032559	0.00678003	0.0088457	0.00917911	0.0077188	0.0108406	0.00885129
0.5252	-0.0038147	0.00556558	0.00897422	0.0101477	0.00815093	0.0119582	0.0071153
0.525617	-0.00521541	0.0051856	0.00833161	0.0101328	0.00865758	0.0121742	0.00456721
0.526033	-0.00657141	0.00635535	0.00742637	0.00962615	0.00911951	0.0118166	0.00213087
0.52645	-0.0070408	0.00920892	0.00658818	0.0083521	0.00859797	0.0114143	0.00165403
0.526867	-0.00712275	0.0126734	0.00597909	0.00662357	0.00690669	0.0117868	0.00354648
0.527283	-0.00758469	0.0154749	0.00561588	0.0057146	0.0051707	0.0130162	0.00650436
0.5277	-0.00873208	0.0169203	0.00549294	0.00597537	0.00422448	0.0147074	0.00943989
0.528117	-0.00990927	0.016816	0.00533089	0.00659376	0.00336766	0.0165924	0.0119209
0.528533	-0.0104234	0.0160635	0.00487827	0.00669062	0.00241399	0.0182465	0.0136942
0.52895	-0.0109076	0.0153258	0.004353	0.00663102	0.00179559	0.0189245	0.013873
0.529367	-0.0117645	0.0144467	0.00417419	0.00668317	0.00221282	0.018537	0.0125021
0.529783	-0.0125766	0.0135377	0.00429712	0.00664592	0.00318885	0.0178069	0.0113621
0.5302	-0.0126138	0.0136048	0.00429712	0.0064373	0.00328571	0.0175014	0.01169
0.530617	-0.0120625	0.0154674	0.00408478	0.00613183	0.00248104	0.0176653	0.0134557
0.531033	-0.0119209	0.0179932	0.00400096	0.00611693	0.00157952	0.0176281	0.0152513
0.53145	-0.0118166	0.0196397	0.00407361	0.00657886	0.00143796	0.0175983	0.0166148
0.531867	-0.0107214	0.0197664	0.00376068	0.0070408	0.00148267	0.0179783	0.0176355
0.532283	-0.00856072	0.0186786	0.00272691	0.00706315	0.000923872	0.0187084	0.0181496
0.5327	-0.006482	0.0170097	0.00140257	0.00656396	0.000566244	0.019148	0.0184402
0.533117	-0.0051111	0.0151396	0.00070408	0.00590086	0.00154227	0.0187457	0.0185519
0.533533	-0.00414997	0.0133738	0.00113994	0.00505149	0.00307709	0.0173971	0.0185743
0.53395	-0.00388175	0.0117198	0.00209548	0.00379235	0.00357628	0.0157207	0.0184104
0.534367	-0.00479072	0.0108406	0.00292808	0.00228733	0.00299513	0.0138953	0.0180304
0.534783	-0.00670552	0.0116229	0.00405684	0.000409782	0.00272691	0.0118911	0.0175089
0.5352	-0.00858307	0.013493	0.00596791	-0.00207871	0.0038743	0.0103414	0.0163466
0.535617	-0.00970811	0.0146255	0.00818632	-0.00466406	0.00570715	0.00999123	0.0145808
0.536033	-0.0100508	0.0145063	0.00928715	-0.00609457	0.00756234	0.0112355	0.0130236
0.53645	-0.00984222	0.0143498	0.00916421	-0.00625849	0.0089854	0.0127032	0.0125542
0.536867	-0.00958145	0.0148714	0.00868924	-0.00576675	0.00970066	0.013575	0.013411
0.537283	-0.00973791	0.015527	0.00805221	-0.00523031	0.00990182	0.0141934	0.0144392
0.5377	-0.010483	0.0158027	0.0069458	-0.00473112	0.00914931	0.0146553	0.0147298
0.538117	-0.0111535	0.016354	0.00547059	-0.00417233	0.00689179	0.0147372	0.0142679
0.538533	-0.0112504	0.0171363	0.004353	-0.00396371	0.00360608	0.0144243	0.0139177
0.53895	-0.0107139	0.0172928	0.00351481	-0.00361353	0.000938773	0.014618	0.0141487
0.539367	-0.00985712	0.0164285	0.0023637	-0.0032261	0.000290573	0.015147	0.0143722
0.539783	-0.00880659	0.0149384	0.000955537	-0.00304729	0.000804663	0.0151247	0.0146553
0.5402	-0.00755489	0.0132546	-0.000279397	-0.00320375	0.000968575	0.014931	0.0155568
0.540617	-0.00656396	0.0111237	-0.00160932	-0.00362843	0.00089407	0.0153333	0.0172257
0.541033	-0.00642985	0.00917167	-0.00329129	-0.00393391	0.00120699	0.0166968	0.0189096
0.54145	-0.00753254	0.00855327	-0.00504591	-0.00487268	0.00203401	0.0180602	0.0193715
0.541867	-0.00961125	0.00945479	-0.00614673	-0.00602752	0.0025183	0.0193194	0.0184253
0.542283	-0.0117198	0.0108108	-0.00652671	-0.00630319	0.00227988	0.0204742	0.0166968
0.5427	-0.0129938	0.0118464	-0.00665523	-0.00522286	0.00217557	0.0208244	0.0146702
0.543117	-0.0134557	0.0128299	-0.00615232	-0.00336766	0.00232458	0.0203401	0.0127777
0.543533	-0.0129864	0.013873	-0.00487268	-0.00152737	0.00224262	0.019297	0.0113249
0.54395	-0.0112951	0.0145957	-0.00281073	-0.000141561	0.00121444	0.0185072	0.0109002
0.544367	-0.00862777	0.0146851	-0.000692904	0.000528991	-0.000283122	0.0173077	0.0113323
0.544783	-0.0064075	0.0145808	0.00089407	0.000663102	-0.00122935	0.0157803	0.0120848
0.5452	-0.00569969	0.0150129	0.00197254	0.000678003	-0.00157207	0.0145435	0.013262
0.545617	-0.00627339	0.0159517	0.00216253	0.000506639	-0.00136346	0.0139922	0.0148118
0.546033	-0.00784546	0.0165552	0.00170432	-0.000312924	-0.00100583	0.0139922	0.0160933
0.54645	-0.0103563	0.0162423	0.000804663	-0.00116974	-0.000938773	0.0138879	0.0162572
0.546867	-0.013262	0.0157207	7.82311e-05	-0.00149757	-0.00169873	0.0145063	0.0158027
0.547283	-0.0155568	0.016205	-8.3819e-05	-0.00178814	-0.00307709	0.0156835	0.0155643
0.5477	-0.0168756	0.0175461	-8.3819e-05	-0.00271201	-0.00394881	0.0166297	0.0151917
0.548117	-0.0173822	0.0190288	-0.000229105	-0.00348687	-0.00406057	0.0165924	0.0145063
0.548533	-0.017114	0.0206679	-0.000620261	-0.00335276	-0.00344962	0.0155866	0.0136346
0.54895	-0.0162944	0.0226945	-0.000709668	-0.00281632	-0.00184029	0.0145286	0.0129417
0.549367	-0.0157729	0.0242442	-0.000385568	-0.00286102	0.000864267	0.0135973	0.0121891
0.549783	-0.0155047	0.024125	-0.000145286	-0.00347197	0.00331551	0.0131056	0.0115708
0.5502	-0.0147596	0.0227168	-5.58794e-05	-0.00363588	0.00369549	0.0134036	0.0116155
0.550617	-0.0136048	0.0208765	0.000642613	-0.00400841	0.00226498	0.0145063	0.0118464
0.551033	-0.0130385	0.0187904	0.00219606	-0.00502914	0.00108778	0.0157282	0.0117794
0.55145	-0.0134781	0.0164062	0.00372715	-0.00607222	0.000819564	0.016503	0.0115037
0.551867	-0.0140294	0.014618	0.0042636	-0.00624359	0.000715256	0.0164807	0.0115857
0.552283	-0.0146478	0.0147149	0.00397861	-0.00556558	0.00077486	0.016205	0.0117719
0.5527	-0.0157878	0.0165254	0.00344776	-0.00561029	0.00174344	0.0161529	0.0114962
0.553117	-0.0172034	0.0194833	0.00288338	-0.00650436	0.00373274	0.0162944	0.0111833
0.553533	-0.017941	0.0227317	0.00200048	-0.00763684	0.00555813	0.0167266	0.0115037
0.55395	-0.0171363	0.0251681	0.000687316	-0.00860542	0.00695139	0.0171885	0.0129715
0.554367	-0.0152215	0.0257641	-0.000419095	-0.00905991	0.00821054	0.0181124	0.0151843
0.554783	-0.0128597	0.0241324	-0.000854954	-0.00906736	0.00920147	0.0190809	0.0172257
0.5552	-0.0109226	0.0214353	-0.000664964	-0.0082776	0.00985712	0.019379	0.0184104
0.555617	-0.0096783	0.0188947	-0.000927597	-0.00686199	0.0101924	0.0189096	0.0185892
0.556033	-0.00876188	0.0171736	-0.00161491	-0.00543892	0.0100136	0.0174344	0.0185296
0.55645	-0.00857562	0.016436	-0.00164285	-0.00445545	0.00883639	0.0152662	0.0181273
0.556867	-0.00967085	0.0163466	-0.000435859	-0.00438839	0.00698119	0.0125244	0.0170395
0.557283	-0.0113398	0.0168234	0.00141375	-0.00502914	0.00535697	0.0101998	0.0153258
0.5577	-0.0119135	0.0176579	0.00280514	-0.00561774	0.00428408	0.00923127	0.0139549
0.558117	-0.0113994	0.0184625	0.0036601	-0.00561029	0.00337511	0.00951439	0.0133365
0.558533	-0.0114664	0.0187606	0.00414625	-0.00514835	0.00226498	0.0108406	0.0128821
0.55895	-0.0125766	0.0191107	0.00415742	-0.00470132	0.00119209	0.0126287	0.0123605
0.559367	-0.0134259	0.0201836	0.00336952	-0.00440329	0.000484288	0.0142455	0.0116006
0.559783	-0.0138134	0.0216961	0.00202283	-0.00414252	0.000335276	0.0148565	0.0111535
0.5602	-0.0151023	0.0225306	0.00100024	-0.00451505	0.000670552	0.0143647	0.011161
0.560617	-0.017032	0.021942	0.000977889	-0.00526756	0.00158697	0.0129342	0.0114739
0.561033	-0.017941	0.0208542	0.00160374	-0.00539422	0.00306964	0.0109822	0.0122786
0.56145	-0.016816	0.0198111	0.00217371	-0.00426173	0.0044927	0.00949204	0.0139475
0.561867	-0.0145063	0.0193045	0.00231341	-0.00223517	0.00549853	0.00911206	0.0167713
0.562283	-0.0121817	0.0189468	0.00211224	-0.000506639	0.00589341	0.00954419	0.0197217
0.5627	-0.0100955	0.0185221	0.00151992	0.000871718	0.00591576	0.00970811	0.0214577
0.563117	-0.0089705	0.0185445	0.000173226	0.00170618	0.00561774	0.00982732	0.0220016
0.563533	-0.00935048	0.0193715	-0.00158139	0.00122935	0.00550598	0.0107661	0.0212416
0.56395	-0.0110865	0.0207275	-0.0031516	-0.000983477	0.00637025	0.0120997	0.0192896
0.564367	-0.013575	0.0212714	-0.00391714	-0.00371784	0.00783801	0.0131726	0.0165477
0.564783	-0.0156686	0.0209734	-0.00403449	-0.00530481	0.0089258	0.0140741	0.0137612
0.5652	-0.0164658	0.0208393	-0.00359863	-0.00564009	0.00935793	0.0154153	0.0118092
0.565617	-0.0155568	0.0210628	-0.00223517	-0.00540912	0.0095591	0.0167489	0.0104979
0.566033	-0.0133738	0.0208393	-0.000581145	-0.00460446	0.0095889	0.0167787	0.00971556
0.56645	-0.0112206	0.0201985	0.000430271	-0.00330061	0.00888854	0.0157207	0.00873953
0.566867	-0.00975281	0.0200421	0.000581145	-0.00301003	0.00748783	0.0144765	0.0077188
0.567283	-0.00944734	0.020057	0.00067614	-0.00385195	0.00619143	0.0135303	0.00747293
0.5677	-0.0103638	0.019446	0.000843778	-0.00444055	0.00508875	0.0124201	0.00777096
0.568117	-0.0120923	0.01847	0.00054203	-0.00410527	0.00359863	0.0106618	0.00811368
0.568533	-0.0143498	0.0177994	7.82311e-05	-0.00342727	0.00162423	0.00870973	0.00824034
0.56895	-0.0162721	0.0170842	0.000346452	-0.00244379	0.000156462	0.00713766	0.0089854
0.569367	-0.0170991	0.0161007	0.00121258	-0.000230968	-0.00025332	0.00668317	0.0105053
0.569783	-0.0165105	0.0158846	0.00191107	0.00222027	8.19564e-05	0.00749528	0.0118986
0.5702	-0.0153333	0.0163764	0.00219606	0.00338256	0.000834465	0.00925362	0.0128523
0.570617	-0.0148565	0.0164211	0.0022687	0.00336021	0.00184774	0.0116825	0.013262
0.571033	-0.0149757	0.0154302	0.00233576	0.00360608	0.00266731	0.0144839	0.0134707
0.57145	-0.0149608	0.0144169	0.00191107	0.00428408	0.00242144	0.0170842	0.0137538
0.571867	-0.0147969	0.0138506	0.00100024	0.00480562	0.00154227	0.0185519	0.0137612
0.572283	-0.014931	0.0130013	-0.000184402	0.00506639	0.00103563	0.0183806	0.0131354
0.5727	-0.0152141	0.0119582	-0.00105612	0.00521541	0.00101328	0.0169277	0.0121593
0.573117	-0.0147596	0.0114888	-0.00122376	0.00531972	0.00106543	0.0153631	0.0116453
0.573533	-0.013411	0.0120029	-0.000949949	0.00483543	0.00140071	0.014469	0.0116602
0.57395	-0.0123531	0.0128523	-0.00051409	0.00368059	0.00247359	0.0143647	0.0114366
0.574367	-0.012137	0.0137761	-5.02914e-05	0.00163913	0.00369549	0.0148043	0.0104979
0.574783	-0.012517	0.0149012	0.000525266	-0.000953674	0.00412762	0.0151694	0.00926852
0.5752	-0.0125617	0.0158846	0.000849366	-0.00355393	0.00382215	0.0154525	0.00814349
0.575617	-0.0119731	0.016503	0.000670552	-0.00593066	0.00362843	0.0152588	0.00740588
0.576033	-0.0108406	0.0172034	0.000184402	-0.00754744	0.00364333	0.0147074	0.00688434
0.57645	-0.00918657	0.0184178	-0.000100583	-0.00813603	0.00354648	0.0141338	0.00619888
0.576867	-0.00724196	0.0193864	5.58794e-05	-0.00775605	0.00349432	0.0131205	0.00586361
0.577283	-0.00540912	0.0198856	0.000525266	-0.00698119	0.00356138	0.0118837	0.00631064
0.5777	-0.00476837	0.0207424	0.00126846	-0.00657886	0.00406057	0.0108406	0.00802428
0.578117	-0.00573695	0.0222027	0.00214018	-0.00645965	0.00490993	0.0107363	0.0105277
0.578533	-0.00785291	0.0232011	0.0028275	-0.00642985	0.00600517	0.0112951	0.0131354
0.57895	-0.009574	0.0233129	0.00283308	-0.00610948	0.00723451	0.0117719	0.0158101
0.579367	-0.00986457	0.0234619	0.00222959	-0.00532717	0.00861287	0.0121146	0.0181273
0.579783	-0.00922382	0.0237525	0.00148639	-0.00432134	0.0104085	0.012815	0.0198483
0.5802	-0.00853092	0.0232235	0.000827014	-0.00292063	0.0118241	0.0138879	0.0197068
0.580617	-0.00806153	0.0216663	5.58794e-05	-0.00139326	0.0121519	0.0147372	0.0171959
0.581033	-0.00776351	0.0196472	-0.000659376	-0.000149012	0.0115782	0.0152066	0.0138134
0.58145	-0.00795722	0.0173002	-0.000586733	-0.000230968	0.0105947	0.0154004	0.0111312
0.581867	-0.00908226	0.0147074	-7.26432e-05	-0.00192225	0.0089556	0.0158399	0.00961125
0.582283	-0.0104308	0.0131726	0.000257045	-0.00402331	0.00672042	0.0164285	0.00849366
0.5827	-0.0106394	0.0137389	0.000318512	-0.00524521	0.00452995	0.0169203	0.00791997
0.583117	-0.00981987	0.0156909	0.000715256	-0.00555813	0.00320375	0.0174195	0.00865758
0.583533	-0.00894815	0.0180379	0.00146404	-0.00585616	0.00291318	0.017792	0.0100732
0.58395	-0.00850111	0.0204742	0.00214018	-0.00596791	0.00330061	0.0179037	0.0108927
0.584367	-0.00827014	0.022687	0.00279956	-0.00508875	0.00433624	0.0177324	0.0103489
0.584783	-0.00815093	0.0234172	0.00316277	-0.00357628	0.00491738	0.0174567	0.00911206
0.5852	-0.00859052	0.0218526	0.00309572	-0.00267476	0.00458211	0.0169501	0.00835955
0.585617	-0.0089854	0.0191331	0.00288338	-0.00248849	0.003919	0.0160113	0.00847131
0.586033	-0.00881404	0.0167564	0.00290014	-0.00239164	0.00395626	0.0145808	0.00923127
0.58645	-0.00882149	0.0151396	0.00274368	-0.00215322	0.00524521	0.0125542	0.0101775
0.586867	-0.00946969	0.0141561	0.00181608	-0.00237674	0.00690669	0.01017	0.0112653
0.587283	-0.0105128	0.0136495	0.000787899	-0.00261515	0.00873208	0.00777841	0.0126213
0.5877	-0.0113994	0.0136718	0.000363216	-0.00213087	0.0109076	0.00625849	0.0137836
0.588117	-0.0120476	0.0138208	0.000346452	-0.00146776	0.012897	0.00561774	0.0142083
0.588533	-0.0126138	0.013724	0.00048615	-0.00112504	0.0136867	0.00593066	0.0139177
0.58895	-0.0127703	0.0136197	0.000938773	-0.00103563	0.0124127	0.00748783	0.0134334
0.589367	-0.0122488	0.0134408	0.00200607	-0.000558794	0.00981241	0.00973791	0.013344
0.589783	-0.0109226	0.0131428	0.0031963	0.000230968	0.00741333	0.0122488	0.0136346
0.5902	-0.00920892	0.0133663	0.00360422	0.000946224	0.00553578	0.0141934	0.0140518
0.590617	-0.008367	0.0143722	0.00291131	0.00148267	0.00365078	0.0157431	0.0145808
0.591033	-0.00888109	0.0154972	0.00132993	0.00169128	0.00189245	0.0168979	0.0152439
0.59145	-0.00983477	0.0155866	-0.000419095	0.00124425	0.00128895	0.0176281	0.0157803
0.591867	-0.0105053	0.0148267	-0.00159815	4.47035e-05	0.00248104	0.0180155	0.0159815
0.592283	-0.0113845	0.0142828	-0.00237487	-0.0019744	0.00461191	0.0177249	0.0158921
0.5927	-0.0128523	0.0141412	-0.00305101	-0.00478327	0.00680238	0.0171959	0.0159368
0.593117	-0.0141263	0.0138432	-0.00349246	-0.00726432	0.00899285	0.0167042	0.0162274
0.593533	-0.0142455	0.0136867	-0.00315718	-0.00891089	0.0108257	0.0162199	0.0164583
0.59395	-0.0136346	0.0145808	-0.00221282	-0.00951439	0.0120327	0.0157952	0.0170395
0.594367	-0.0132397	0.0163093	-0.00164285	-0.00908226	0.0122935	0.0156611	0.0181422
0.594783	-0.0129268	0.0177845	-0.0013411	-0.00817329	0.0117719	0.0161901	0.0193939
0.5952	-0.0117868	0.0180379	-0.000603497	-0.00675768	0.0111461	0.0169873	0.0200495
0.595617	-0.00993162	0.0173897	0.000726432	-0.00548363	0.01055	0.0176802	0.019528
0.596033	-0.00832975	0.0162199	0.00164285	-0.00417978	0.0096932	0.0182986	0.0184104
0.59645	-0.00755489	0.0146255	0.00151992	-0.00314415	0.00795722	0.0186637	0.0171885
0.596867	-0.00732392	0.0130907	0.00103936	-0.00300258	0.00546128	0.0186861	0.016205
0.597283	-0.00721961	0.0121072	0.000597909	-0.00278652	0.00288338	0.0185892	0.0156984
0.5977	-0.00691414	0.0119731	0.000240281	-0.00201911	0.000968575	0.0182167	0.0155345
0.598117	-0.00611693	0.0123009	-0.000385568	-0.000946224	0.000223517	0.0170469	0.015676
0.598533	-0.00463426	0.0128224	-0.00105612	-0.000357628	0.00077486	0.0156164	0.0156686
0.59895	-0.00268221	0.0137091	-0.00134669	0	0.00216812	0.0149384	0.0155941
0.599367	-0.000581145	0.014998	-0.00144169	0.000871718	0.00394881	0.0151396	0.0159144
0.599783	0.00144541	0.0161007	-0.0015758	0.00149757	0.00593811	0.014998	0.0166297
0.6002	0.00248104	0.0166595	-0.00253692	0.00112504	0.00736117	0.0146776	0.0177398
0.600617	0.00210851	0.0170469	-0.00411272	-0.000111759	0.00745058	0.0152364	0.0192449
0.601033	0.000335276	0.0174195	-0.00559352	-0.00173599	0.00600517	0.0164658	0.0208393
0.60145	-0.00250339	0.017181	-0.0064373	-0.00348687	0.00400096	0.0174567	0.0216886
0.601867	-0.00564009	0.0159889	-0.00668876	-0.00496954	0.00221282	0.0182316	0.0213385
0.602283	-0.00875443	0.0143349	-0.00670552	-0.00561774	0.000752509	0.0197664	0.020273
0.6027	-0.0108555	0.0129119	-0.00594556	-0.0050962	0.000320375	0.0220388	0.018619
0.603117	-0.011526	0.0121593	-0.00429153	-0.00342727	0.00128895	0.0243932	0.0165924
0.603533	-0.0111684	0.0119284	-0.00231899	-0.00122189	0.00329316	0.0259653	0.014931
0.60395	-0.0101775	0.0120252	-0.00089407	0.000596046	0.00541657	0.0264868	0.0143349
0.604367	-0.00926107	0.0123605	-0.000206754	0.00102818	0.00769645	0.0261217	0.0141934
0.604783	-0.00854582	0.0133514	0.000257045	0.000521541	0.0108331	0.0253171	0.0135601
0.6052	-0.0083968	0.0153035	0.000614673	-0.000201166	0.0143126	0.0243038	0.0128895
0.605617	-0.00866502	0.017114	0.000363216	-0.000864267	0.0170395	0.022918	0.0129715
0.606033	-0.00884384	0.0180006	-0.000748783	-0.00124425	0.0184923	0.0215769	0.0137314
0.60645	-0.00876188	0.0181124	-0.00211224	-0.00121444	0.0190213	0.0207499	0.0143573
0.606867	-0.00816584	0.0176653	-0.00276044	-0.000715256	0.0189766	0.0200272	0.014782
0.607283	-0.00729412	0.0168756	-0.00240281	-0.000156462	0.0181943	0.018917	0.0152886
0.6077	-0.00665337	0.0156164	-0.00150315	-0.000163913	0.0164583	0.0178963	0.0159889
0.608117	-0.00655651	0.0142753	-0.000312924	-0.000961125	0.0141263	0.0173971	0.0163987
0.608533	-0.00713766	0.0130013	0.000944361	-0.00204146	0.0121519	0.0177622	0.0165626
0.60895	-0.0082925	0.0119209	0.00193901	-0.00280142	0.0111684	0.0184178	0.0168309
0.609367	-0.00968576	0.0118241	0.00240281	-0.00279397	0.0108182	0.0188872	0.016652
0.609783	-0.0106618	0.0123531	0.00206754	-0.00242144	0.0103265	0.0189096	0.0160709
0.6102	-0.0104979	0.0128746	0.00106171	-0.00212342	0.00949949	0.0182167	0.0153333
0.610617	-0.00950694	0.0133142	-0.00035204	-0.0019446	0.0090301	0.0176653	0.0149533
0.611033	-0.00782311	0.0144616	-0.00157021	-0.00187755	0.00926852	0.0175983	0.0148416
0.61145	-0.00561774	0.0163615	-0.00238046	-0.0019446	0.0100806	0.0179783	0.0148118
0.611867	-0.00348687	0.0175759	-0.00316836	-0.00220537	0.0106692	0.0184402	0.0156462
0.612283	-0.00159442	0.0173599	-0.0037998	-0.00275671	0.0105798	0.0190213	0.0168905
0.6127	-8.9407e-05	0.0164285	-0.00407919	-0.00362098	0.0106022	0.0205114	0.0178814
0.613117	0.000663102	0.0160933	-0.00396743	-0.00475347	0.0114664	0.0222921	0.0187457
0.613533	0.000223517	0.0163019	-0.00365451	-0.00590086	0.0129342	0.0232533	0.0195429
0.61395	-0.000752509	0.0163466	-0.00320747	-0.00682473	0.0137836	0.0232235	0.020057
0.614367	-0.00149012	0.0161752	-0.00260957	-0.00736862	0.0140965	0.0232086	0.019908
0.614783	-0.00244379	0.0159219	-0.00216812	-0.00716001	0.0149459	0.0238046	0.0193715
0.6152	-0.0044927	0.0158921	-0.00182167	-0.00623614	0.016138	0.0236556	0.0188574
0.615617	-0.00654906	0.0158772	-0.00143051	-0.00510365	0.0165999	0.0225455	0.0176728
0.616033	-0.00736862	0.015676	-0.00122376	-0.00400841	0.0161529	0.0216439	0.0162944
0.61645	-0.00732392	0.0152364	-0.00137463	-0.00285357	0.0153705	0.0217333	0.0154451
0.616867	-0.00693649	0.0148341	-0.00154786	-0.00201911	0.0141412	0.022158	0.0149533
0.617283	-0.00628829	0.0154004	-0.00130199	-0.00238419	0.0121519	0.0217855	0.014782
0.6177	-0.00476837	0.0164807	-0.000709668	-0.0031665	0.0100806	0.0209957	0.0145882
0.618117	-0.003241	0.0170544	5.58794e-06	-0.00294298	0.00877678	0.0201985	0.0145733
0.618533	-0.00223517	0.0174269	0.000709668	-0.00186265	0.00786036	0.0193939	0.0141934
0.61895	-0.0012517	0.0182018	0.00132434	-0.00103563	0.00692159	0.0186414	0.013344
0.619367	-0.000447035	0.0192896	0.00167079	-0.000804663	0.0064671	0.017859	0.0131205
0.619783	-0.000350177	0.0195354	0.0016652	-0.000625849	0.00692159	0.0175908	0.0138059
0.6202	-0.000983477	0.018701	0.0010673	-0.000536442	0.00735372	0.0179559	0.0152513
0.620617	-0.00136346	0.017345	-0.000106171	-0.000819564	0.00689924	0.0183135	0.017181
0.621033	-0.00153482	0.0152364	-0.00150315	-0.00108033	0.00638515	0.0180975	0.0196397
0.62145	-0.00208616	0.0130683	-0.0027325	-0.00114739	0.00683218	0.0171736	0.0219941
0.621867	-0.0025481	0.0108555	-0.00381656	-0.00151247	0.00775605	0.0161007	0.0228882
0.622283	-0.00205636	0.00912696	-0.00509061	-0.00227988	0.00805408	0.0149384	0.0225604
0.6227	-0.00119209	0.00842661	-0.00605732	-0.00361353	0.0083521	0.0137091	0.0221208
0.623117	-0.0012368	0.0090152	-0.00628084	-0.00520051	0.00931323	0.0129789	0.0219122
0.623533	-0.00247359	0.0109375	-0.00537001	-0.00657886	0.0102147	0.013262	0.0209957
0.62395	-0.00432879	0.0127032	-0.0037998	-0.00721216	0.0103712	0.0143945	0.0192672
0.624367	-0.00626594	0.0142977	-0.0023637	-0.00713021	0.010401	0.0160262	0.0180379
0.624783	-0.00805408	0.015758	-0.00127964	-0.00714511	0.0114292	0.0178665	0.0174046
0.6252	-0.00945479	0.0169054	-0.000474975	-0.00718981	0.0124574	0.0195429	0.016436
0.625617	-0.00998378	0.0173897	0.000150874	-0.00709295	0.0124872	0.0207946	0.0148714
0.626033	-0.00926852	0.0170171	-3.91155e-05	-0.00695139	0.0121072	0.0212863	0.0135377
0.62645	-0.0076741	0.0168234	-0.00116788	-0.00696629	0.0122637	0.0211447	0.013262
0.626867	-0.00600517	0.0171959	-0.00223517	-0.0070706	0.012897	0.0205487	0.0133291
0.627283	-0.00506639	0.0179037	-0.00239722	-0.00707805	0.0129491	0.0196621	0.0134557
0.6277	-0.00436604	0.0182167	-0.00202283	-0.00725687	0.0125542	0.0188351	0.0142157
0.628117	-0.00341237	0.0176132	-0.00167638	-0.00762194	0.0123829	0.0181496	0.0155643
0.628533	-0.00237674	0.0160113	-0.00130199	-0.00815839	0.0123531	0.017263	0.017345
0.62895	-0.00158697	0.0134557	-0.000631437	-0.0089705	0.0119805	0.0160038	0.0188649
0.629367	-0.00118464	0.0109151	-0.000128523	-0.0090301	0.0109226	0.0150725	0.0202507
0.629783	-0.000976026	0.00920147	-0.00048615	-0.0077337	0.00952929	0.0150427	0.0212193
0.6302	-0.00154972	0.0083223	-0.00183843	-0.00531226	0.00812858	0.0155717	0.0212118
0.630617	-0.00311434	0.00791997	-0.00399537	-0.00281632	0.00687689	0.0163615	0.0202656
0.631033	-0.00470877	0.00838935	-0.00619143	-0.000834465	0.00556558	0.017859	0.01885
0.63145	-0.00549853	0.00993162	-0.00790693	0.00108778	0.00432134	0.0202432	0.0175238
0.631867	-0.00563264	0.0115931	-0.00876747	0.00260025	0.0039041	0.0224486	0.0167415
0.632283	-0.00528991	0.0127628	-0.00870041	0.00412017	0.00497699	0.0236779	0.0170395
0.6327	-0.00406057	0.0133067	-0.00753254	0.00589341	0.00768155	0.0240132	0.0183284
0.633117	-0.00172108	0.0135526	-0.00521913	0.00741333	0.0111982	0.0240058	0.0200197
0.633533	0.000737607	0.0133887	-0.0027772	0.00832975	0.0150725	0.0234023	0.0211746
0.63395	0.00234693	0.013046	-0.00121258	0.00856817	0.0183135	0.0218824	0.0217333
0.634367	0.00311434	0.0128895	-0.000961125	0.00821054	0.0198856	0.0200719	0.0211522
0.634783	0.00312179	0.012815	-0.0014808	0.00652671	0.0194833	0.0186488	0.0191852
0.6352	0.0025779	0.013411	-0.00200048	0.00353157	0.0173151	0.0182092	0.0168011
0.635617	0.00164658	0.0149831	-0.00214018	0.000484288	0.0143573	0.0178963	0.0156909
0.636033	0.000715256	0.0171885	-0.0018999	-0.00184029	0.0114143	0.017345	0.0165477
0.63645	0.000149012	0.0189692	-0.00120699	-0.00356138	0.0095591	0.0166595	0.0182167
0.636867	-4.47035e-05	0.0198856	-7.26432e-05	-0.00430644	0.00937283	0.0159591	0.0196546
0.637283	-0.000149012	0.0201464	0.00129081	-0.00391155	0.0107735	0.0158474	0.0202134
0.6377	-0.000558794	0.019975	0.00208989	-0.00283867	0.0127926	0.0160784	0.0198632
0.638117	-0.00151992	0.0193641	0.00197254	-0.00202656	0.0145584	0.0169128	0.0181422
0.638533	-0.00307709	0.0184029	0.00156462	-0.00202656	0.0156015	0.0182912	0.0154749
0.63895	-0.00475347	0.0173971	0.00143051	-0.00264496	0.0156835	0.0198558	0.0131056
0.639367	-0.00564754	0.0167787	0.00149757	-0.00356138	0.014998	0.0213683	0.0121146
0.639783	-0.00494719	0.0169054	0.00119582	-0.00375509	0.013493	0.0220537	0.0129715
0.6402	-0.00301748	0.017181	0.000447035	-0.00303984	0.0120252	0.0219792	0.0149086
0.640617	-0.00116974	0.017032	-0.000301749	-0.00163913	0.011161	0.02148	0.0173897
0.641033	4.47035e-05	0.016056	-0.000810251	0.000238419	0.010699	0.0206232	0.0199974
0.64145	0.000566244	0.0149682	-0.00149757	0.00211597	0.0103861	0.0195429	0.0220761
0.641867	0.000230968	0.0143349	-0.0023637	0.00345707	0.00973046	0.0183135	0.0230372
0.642283	-0.00152737	0.0139177	-0.00284985	0.00403822	0.00916421	0.0174567	0.0229031
0.6427	-0.00456721	0.0137091	-0.00234693	0.00419468	0.00881404	0.0172108	0.0226647
0.643117	-0.00719726	0.0134856	-0.00127964	0.00388175	0.00844151	0.0175387	0.0223815
0.643533	-0.00817329	0.0135452	-0.000592321	0.003241	0.00831485	0.0187159	0.021331
0.64395	-0.00806153	0.013724	7.82311e-05	0.00324845	0.00882149	0.0206456	0.0195652
0.644367	-0.00782311	0.0135377	0.00110641	0.00455976	0.0101849	0.0224561	0.0184104
0.644783	-0.00754744	0.0128448	0.0022687	0.00613183	0.0114366	0.0235811	0.0180379
0.6452	-0.00664592	0.0116974	0.00283308	0.00739843	0.0118241	0.0236556	0.0170916
0.645617	-0.00567734	0.0110343	0.00267662	0.00881404	0.0117049	0.0228807	0.0156835
0.646033	-0.00566244	0.0114739	0.00230223	0.0100732	0.0116155	0.0215247	0.0147894
0.64645	-0.0057444	0.0124648	0.00161491	0.00994652	0.0113174	0.020206	0.0149757
0.646867	-0.0051558	0.0133589	0.00054203	0.00787526	0.010848	0.0196397	0.01546
0.647283	-0.00382215	0.0141859	-0.000692904	0.00510365	0.0107065	0.0193939	0.0160411
0.6477	-0.00274181	0.0151098	-0.00184402	0.00242144	0.0109226	0.0191778	0.0169575
0.648117	-0.0026077	0.0156239	-0.00313483	-6.70552e-05	0.0111386	0.0192225	0.017792
0.648533	-0.00273436	0.0148937	-0.00455417	-0.00190735	0.0108778	0.019528	0.0179186
0.64895	-0.0031516	0.0133365	-0.00552647	-0.00238419	0.0102222	0.0201017	0.017032
0.649367	-0.00386685	0.0120401	-0.00573322	-0.00130385	0.00918657	0.0207126	0.0153929
0.649783	-0.00496954	0.0111759	-0.00547618	0.000506639	0.00787526	0.0213087	0.0134557
0.6502	-0.00596791	0.0102147	-0.00483915	0.00224262	0.00687689	0.0214651	0.0118241
0.650617	-0.00579655	0.00934303	-0.003336	0.00347197	0.00628084	0.020802	0.0112951
0.651033	-0.00465661	0.00958145	-0.00114553	0.00435859	0.00601262	0.0199005	0.0123233
0.65145	-0.00323355	0.0108704	0.000681728	0.00467897	0.00615418	0.0185743	0.0143051
0.651867	-0.00221282	0.0120476	0.00164844	0.00427663	0.00673533	0.0172406	0.0164062
0.652283	-0.00150502	0.0125021	0.00192784	0.00342727	0.00780076	0.0166595	0.018239
0.6527	-0.000737607	0.0130236	0.00159815	0.0026077	0.00870973	0.0177175	0.020057
0.653117	0.00013411	0.013791	0.00048615	0.00209361	0.00941753	0.0196472	0.0210777
0.653533	0.000745058	0.0142679	-0.00126846	0.00164658	0.0107512	0.0206828	0.0209361
0.65395	0.000827014	0.014469	-0.00251457	0.00172854	0.0127405	0.0210032	0.0207648
0.654367	0.000290573	0.0151172	-0.00307336	0.00265241	0.014253	0.0211373	0.0213012
0.654783	-0.000841916	0.0159964	-0.00334159	0.00391155	0.0139922	0.0212118	0.02224
0.6552	-0.00216812	0.0158474	-0.00343658	0.00469387	0.0125915	0.0203773	0.0227019
0.655617	-0.0032708	0.0146627	-0.00314042	0.00450015	0.0113845	0.0189766	0.0229552
0.656033	-0.00366569	0.0130683	-0.00210106	0.00333041	0.0102296	0.0181943	0.022985
0.65645	-0.00353903	0.0114888	-0.00112876	0.0012964	0.00856072	0.0182241	0.0219122
0.656867	-0.00338256	0.0096932	-0.000553206	-0.0013262	0.00697374	0.0185892	0.0204593
0.657283	-0.00343472	0.00829995	-0.000307336	-0.00365824	0.00659376	0.0188723	0.0197291
0.6577	-0.00394881	0.00841916	-8.9407e-05	-0.00462681	0.007011	0.0194013	0.0198111
0.658117	-0.00532717	0.00996143	0.000245869	-0.00396371	0.00649691	0.020206	0.0197366
0.658533	-0.00755489	0.0124127	0.000346452	-0.00190735	0.00482798	0.0207424	0.0194907
0.65895	-0.0101179	0.0151247	-1.11759e-05	0.000685453	0.00365078	0.0207424	0.0194833
0.659367	-0.0119433	0.0176206	-0.000631437	0.00329316	0.00362098	0.0203401	0.0188723
0.659783	-0.0118613	0.0192523	-0.001017	0.00543892	0.00406802	0.0198036	0.0169426
0.6602	-0.0101179	0.0196621	-0.00113994	0.00648946	0.00464916	0.0193641	0.0145137
0.660617	-0.00789762	0.0192523	-0.00138581	0.00662357	0.00587851	0.0192523	0.0131577
0.661033	-0.00632554	0.0185668	-0.00187755	0.00602007	0.00739843	0.0197142	0.0127554
0.66145	-0.00495464	0.0176057	-0.00225194	0.00490248	0.00789762	0.0208169	0.0128374
0.661867	-0.0031516	0.0160635	-0.00227988	0.00339001	0.00755489	0.0219345	0.0134707
0.662283	-0.00183284	0.0142977	-0.00173226	0.00213087	0.00724196	0.0225902	0.0147074
0.6627	-0.0013262	0.0132769	-0.00110082	0.00204146	0.00716746	0.0222996	0.0163615
0.663117	-0.00102073	0.0134856	-0.00122935	0.00290573	0.00698864	0.0210851	0.0174642
0.663533	-0.000759959	0.0142977	-0.00217929	0.00412762	0.00693649	0.0198185	0.0182316
0.66395	-0.00113994	0.0151545	-0.003241	0.00558793	0.00748783	0.0189692	0.0189394
0.664367	-0.00209361	0.016056	-0.00424683	0.00680983	0.00832975	0.0188872	0.0194237
0.664783	-0.00275671	0.0169575	-0.00592321	0.00712275	0.0089854	0.0194013	0.0194237
0.6652	-0.00280142	0.01733	-0.00778958	0.00599772	0.00907481	0.020653	0.018537
0.665617	-0.00270456	0.0170469	-0.00845455	0.00400841	0.00889599	0.022471	0.0175834
0.666033	-0.00235438	0.0161976	-0.00762194	0.00213087	0.00873953	0.0240728	0.0169426
0.66645	-0.0013113	0.0146925	-0.00625849	0.000707805	0.00858307	0.0249669	0.016652
0.666867	0.000201166	0.0129044	-0.00520237	0.000506639	0.00891089	0.0246316	0.0166968
0.667283	0.00169128	0.0115931	-0.00413507	0.00130385	0.00993162	0.0233427	0.0168234
0.6677	0.00219047	0.0115857	-0.00292808	0.00248849	0.0117272	0.0215471	0.0172257
0.668117	0.00146776	0.0121593	-0.00183843	0.00371784	0.0132918	0.0203252	0.0180304
0.668533	0.000543892	0.012286	-0.00103377	0.00464171	0.014171	0.0200272	0.019379
0.66895	0.000476837	0.0118613	-0.000642613	0.00535697	0.0148937	0.020057	0.0207722
0.669367	0.000759959	0.0112802	-0.000586733	0.00526011	0.0149533	0.020504	0.0213757
0.669783	5.21541e-05	0.0107214	-0.00103936	0.0045076	0.0139922	0.0211149	0.0215694
0.6702	-0.00149012	0.00981987	-0.0017155	0.00376999	0.0126734	0.0217557	0.0216961
0.670617	-0.00271201	0.00900775	-0.00206195	0.00345707	0.0123307	0.0216067	0.0215247
0.671033	-0.00335276	0.00911206	-0.00221841	0.00375509	0.0126734	0.020124	0.0207275
0.67145	-0.00423938	0.0102147	-0.00242516	0.00389665	0.0123829	0.0179112	0.019595
0.671867	-0.00543147	0.0117496	-0.00248663	0.00368804	0.0115782	0.015907	0.0185892
0.672283	-0.0063926	0.0136048	-0.00181049	0.00339001	0.0110641	0.0148118	0.0176653
0.6727	-0.00654906	0.0155196	-0.000603497	0.00311434	0.01055	0.0148416	0.0166371
0.673117	-0.00558793	0.0169128	-2.79397e-05	0.0026226	0.00949949	0.0158772	0.0156388
0.673533	-0.0038743	0.017643	-0.000335276	0.00263751	0.00857562	0.0178814	0.0150055
0.67395	-0.00209361	0.0182912	-0.000670552	0.00380725	0.00824779	0.0201091	0.0149384
0.674367	-0.00110269	0.0196919	-0.000391155	0.00575185	0.00857562	0.0216439	0.0156984
0.674783	-0.00064075	0.0208467	8.9407e-05	0.0076443	0.00893325	0.023067	0.0170097
0.6752	-0.000156462	0.0206232	-5.58794e-05	0.00873208	0.00926107	0.0242516	0.0184402
0.675617	-0.000290573	0.0189543	-0.000553206	0.00931323	0.00952184	0.0246987	0.0194013
0.676033	-0.00151247	0.0166968	-0.000664964	0.00896305	0.009574	0.0239909	0.0195429
0.67645	-0.00341237	0.0146478	-0.000631437	0.00794232	0.00956654	0.0227243	0.019066
0.676867	-0.00464916	0.0126958	-0.00113435	0.00656396	0.00919402	0.0220463	0.0181496
0.677283	-0.00463426	0.0112578	-0.00192784	0.00468642	0.00883639	0.0212938	0.0175908
0.6777	-0.00431389	0.0110716	-0.00193343	0.00291318	0.00897795	0.0200868	0.0177175
0.678117	-0.00400841	0.0118464	-0.000938773	0.00156462	0.00959635	0.0186116	0.0185743
0.678533	-0.00348687	0.0123754	0.000229105	0.000752509	0.00985712	0.0175908	0.019677
0.67895	-0.00292808	0.0122264	0.00113435	8.19564e-05	0.00959635	0.017561	0.0206977
0.679367	-0.00298023	0.012137	0.0020396	-0.000394881	0.00936538	0.018023	0.0218451
0.679783	-0.00397861	0.0126064	0.00283867	3.72529e-05	0.00909716	0.0187382	0.0223219
0.6802	-0.00484288	0.0133142	0.00295602	0.00122935	0.00816584	0.0191033	0.0217482
0.680617	-0.00487268	0.0142008	0.00264868	0.00219792	0.00698864	0.01885	0.0204295
0.681033	-0.00452995	0.0157356	0.0027325	0.00227988	0.00675023	0.0182316	0.0191256
0.68145	-0.00406802	0.017643	0.00329129	0.00135601	0.00742823	0.0175685	0.0178367
0.681867	-0.0032708	0.0191778	0.00348128	0.000312924	0.00789016	0.0167936	0.0166595
0.682283	-0.00198185	0.0195876	0.00293925	-0.000283122	0.00759214	0.0155792	0.0166222
0.6827	-0.000797212	0.0190437	0.00196695	-0.000245869	0.00734627	0.0147671	0.017792
0.683117	-0.000305474	0.0182316	0.000519678	0.000469387	0.00744313	0.0152513	0.0189692
0.683533	-0.000558794	0.017412	-0.00138581	0.00148267	0.00727922	0.016883	0.0193343
0.68395	-0.00127405	0.0168234	-0.00300072	0.00233948	0.00641495	0.0183955	0.019379
0.684367	-0.00236929	0.0165701	-0.00341982	0.00198185	0.00536442	0.0191852	0.0193194
0.684783	-0.00409782	0.0173002	-0.0026878	0.000759959	0.00438839	0.0195578	0.0187606
0.6852	-0.00603497	0.0191033	-0.00112876	-0.000312924	0.00303239	0.0198483	0.0180081
0.685617	-0.0070706	0.0212416	0.000949949	-0.000827014	0.00205636	0.0197217	0.0178963
0.686033	-0.00651181	0.0229403	0.00292249	-0.000782311	0.00207871	0.0186712	0.0179783
0.68645	-0.0051409	0.0239611	0.00417419	-0.000156462	0.00283122	0.0173524	0.0171065
0.686867	-0.00392646	0.0242889	0.00496209	0.0018552	0.0038147	0.016056	0.0151768
0.687283	-0.00244379	0.0241026	0.00554882	0.00457466	0.00546128	0.0146255	0.0132546
0.6877	-0.000499189	0.0237897	0.00539236	0.0063628	0.00792742	0.0126064	0.0118092
0.688117	0.000461936	0.0239462	0.00389479	0.00676513	0.00947714	0.0102967	0.0106692
0.688533	-0.000603497	0.0246242	0.00155903	0.00630319	0.00920892	0.00804663	0.0104383
0.68895	-0.00234693	0.0247583	-0.000581145	0.0057295	0.00826269	0.00595301	0.0120103
0.689367	-0.00298023	0.0239536	-0.00235252	0.00462681	0.00784546	0.00520051	0.0147671
0.689783	-0.00232458	0.0222996	-0.00372715	0.00288338	0.00761449	0.00624359	0.0168905
0.6902	-0.00133365	0.0200048	-0.00439771	0.00147521	0.00712275	0.00809133	0.0178367
0.690617	-0.000320375	0.0174716	-0.00357069	0.00115484	0.00698864	0.00981241	0.0186861
0.691033	0.000223517	0.0155643	-0.00131875	0.00203401	0.00800192	0.0118092	0.0203475
0.69145	-0.000648201	0.0151992	0.00126287	0.00341237	0.00956654	0.0145212	0.0218824
0.691867	-0.00304729	0.0158548	0.00326894	0.00484288	0.0108406	0.0166595	0.0226647
0.692283	-0.00628084	0.0167415	0.00410713	0.00605732	0.0118241	0.0175834	0.0227019
0.6927	-0.0096038	0.0177249	0.0039842	0.00717491	0.0127777	0.0180081	0.0223145
0.693117	-0.0124276	0.0185966	0.00325218	0.0077039	0.0137165	0.0184476	0.0215471
0.693533	-0.0139847	0.0184625	0.00234134	0.0070259	0.0141263	0.0185147	0.0200421
0.69395	-0.0137538	0.0168681	0.00159815	0.00570715	0.0140741	0.0176951	0.0180677
0.694367	-0.0118166	0.0147745	0.000743195	0.00483543	0.0136718	0.016436	0.0158474
0.694783	-0.0089705	0.012517	0.000262633	0.00474602	0.0130013	0.0149012	0.014469
0.6952	-0.00583381	0.0104085	0.00035204	0.00463426	0.0121146	0.0135005	0.0145361
0.695617	-0.00278652	0.0090301	0.000273809	0.00395626	0.0108778	0.0125617	0.0154376
0.696033	-0.000283122	0.00920147	-0.000564381	0.00293553	0.00962615	0.0122115	0.0163913
0.69645	0.00111759	0.011012	-0.00205077	0.00128895	0.00869483	0.0122711	0.0177622
0.696867	0.000700355	0.0134707	-0.0030119	-0.00118464	0.00846386	0.0122339	0.0200346
0.697283	-0.00119209	0.0163242	-0.00343658	-0.00407547	0.00856817	0.0124723	0.0223368
0.6977	-0.00343472	0.0186786	-0.00391714	-0.00716746	0.00856817	0.0136271	0.0235587
0.698117	-0.0050813	0.0196695	-0.00430271	-0.00965595	0.00847131	0.0158548	0.0236556
0.698533	-0.00570715	0.0191107	-0.00442006	-0.0108927	0.00789016	0.0184402	0.0234768
0.69895	-0.00496209	0.0178218	-0.00430271	-0.0109076	0.0070557	0.0210032	0.022769
0.699367	-0.00313669	0.0169054	-0.00457093	-0.0107735	0.00610203	0.0238046	0.0216737
0.699783	-0.00111759	0.0167638	-0.00521354	-0.0113547	0.00544637	0.0264049	0.0208318
0.7002	-5.96046e-05	0.0177771	-0.00558235	-0.0118688	0.00490993	0.0274926	0.020206
0.700617	5.96046e-05	0.0195578	-0.00537001	-0.0117123	0.00484288	0.0266582	0.0196472
0.701033	-0.000178814	0.0212342	-0.00476092	-0.0107363	0.00579655	0.0245646	0.0191852
0.70145	-0.000707805	0.0220388	-0.00410713	-0.00935048	0.00730157	0.021629	0.019528
0.701867	-0.00144541	0.0221431	-0.003241	-0.00746548	0.00873953	0.0182688	0.0205413
0.702283	-0.00230223	0.0217929	-0.002224	-0.00482798	0.00953674	0.0158772	0.021182
0.7027	-0.00274926	0.0206903	-0.00149757	-0.00181049	0.010252	0.0154153	0.0214279
0.703117	-0.00286847	0.0191107	-0.00126287	0.000819564	0.0110269	0.016287	0.021264
0.703533	-0.00255555	0.0176653	-0.00117347	0.00195205	0.0119507	0.0175536	0.0207722
0.70395	-0.00160188	0.0168756	-0.000804663	0.00161678	0.0128597	0.019066	0.0201687
0.704367	-5.96046e-05	0.0159964	-0.000318512	0.000506639	0.0132397	0.0206381	0.019446
0.704783	0.00139326	0.0147	0.000117347	-0.00025332	0.0133365	0.0214055	0.0191256
0.7052	0.00230223	0.0136644	0.000804663	0.000283122	0.013791	0.020951	0.0194907
0.705617	0.00304729	0.0136867	0.00181049	0.00208616	0.0147223	0.0197142	0.0207648
0.706033	0.0038594	0.0149757	0.00295043	0.00420958	0.0151321	0.0185445	0.0226423
0.70645	0.00442564	0.0169054	0.00377744	0.00578165	0.014469	0.0174642	0.0240952
0.706867	0.00415742	0.0193566	0.00401214	0.00703335	0.0132099	0.0162646	0.0254065
0.707283	0.00367314	0.0220761	0.0037048	0.00731647	0.011988	0.0148416	0.0266209
0.7077	0.00362098	0.0240281	0.00287779	0.00537932	0.0109151	0.0142455	0.027217
0.708117	0.00335276	0.0244901	0.00195019	0.00134855	0.00984222	0.0154376	0.0270605
0.708533	0.00216067	0.0240058	0.00122935	-0.00261515	0.00926852	0.0175089	0.0265613
0.70895	0.000350177	0.0236183	0.000759959	-0.00417233	0.00943989	0.0195354	0.0269488
0.709367	-0.000931323	0.0234246	0.000625849	-0.00374764	0.00984222	0.0212565	0.0275895
0.709783	-0.00162423	0.0230521	0.00104494	-0.00236929	0.00988692	0.0227094	0.0278503
0.7102	-0.0025481	0.0233054	0.00202842	-0.000782311	0.00929832	0.0229105	0.0278652
0.710617	-0.00282377	0.0239983	0.00272691	0.000573695	0.00893325	0.0210181	0.0272319
0.711033	-0.0019297	0.023894	0.00249781	0.00157207	0.00927597	0.0181645	0.0259355
0.71145	-0.000409782	0.0223368	0.00134669	0.00163168	0.00968576	0.0158399	0.0240579
0.711867	0.00064075	0.0200272	-0.000279397	0.00108778	0.00996143	0.0146329	0.0225306
0.712283	0.00107288	0.0179335	-0.00199489	0.00026077	0.0104755	0.0144318	0.0216216
0.7127	0.00211597	0.0157207	-0.00373274	-0.000119209	0.0115037	0.0150129	0.0209585
0.713117	0.00354648	0.0139028	-0.00499561	0.000789762	0.0121519	0.0163466	0.0213161
0.713533	0.00496954	0.0135452	-0.00566617	0.0025481	0.0114664	0.017859	0.0226349
0.71395	0.00584871	0.0147522	-0.00549294	0.0045076	0.0104085	0.0188351	0.0239164
0.714367	0.00570715	0.0162199	-0.00459887	0.00542402	0.0102744	0.0188798	0.0241324
0.714783	0.00460446	0.0169724	-0.00371039	0.00517815	0.0106692	0.0181645	0.0237301
0.7152	0.00283122	0.0173971	-0.00323542	0.00423193	0.0108331	0.0168607	0.0237375
0.715617	0.000834465	0.0178814	-0.003241	0.00216067	0.0103563	0.0146404	0.0239089
0.716033	-0.00140816	0.0180528	-0.00338629	-0.000819564	0.00949949	0.0121295	0.0235885
0.71645	-0.00374019	0.0178069	-0.00382774	-0.00370294	0.00802428	0.0104085	0.0228211
0.716867	-0.00507384	0.017561	-0.00452623	-0.00490993	0.00559539	0.0100657	0.022307
0.717283	-0.00475347	0.017032	-0.00504032	-0.00457466	0.00300258	0.0107065	0.0221208
0.7177	-0.00369549	0.0160784	-0.00526383	-0.00427663	0.00102818	0.0117868	0.0216514
0.718117	-0.00287592	0.0151098	-0.00540912	-0.00401586	0.000305474	0.0136569	0.0209883
0.718533	-0.00266731	0.0144392	-0.00563823	-0.00335276	0.000745058	0.0160262	0.0208691
0.71895	-0.00212342	0.0136271	-0.00571646	-0.00296533	0.00245869	0.0180304	0.0211746
0.719367	-0.00104308	0.0127479	-0.00574999	-0.00386685	0.0057444	0.0193417	0.0210404
0.719783	-0.000290573	0.0129193	-0.00587292	-0.00536442	0.01017	0.019975	0.0205711
0.7202	-0.000394881	0.0139624	-0.00585616	-0.00597537	0.0145286	0.0204146	0.0207126
0.720617	-0.00120699	0.0143722	-0.00520796	-0.00581145	0.017792	0.0203997	0.0211746
0.721033	-0.00186265	0.0139549	-0.00388361	-0.00542402	0.0198334	0.0199154	0.0210404
0.72145	-0.00248104	0.014171	-0.00217371	-0.0044927	0.0207946	0.0195652	0.0203699
0.721867	-0.00309199	0.0160038	-0.000402331	-0.00248104	0.020273	0.0194088	0.0200495
0.722283	-0.00351667	0.0186414	0.00126287	-0.000149012	0.0182539	0.0186563	0.0201538
0.7227	-0.00350922	0.0213832	0.00264309	0.0018999	0.0152215	0.0170097	0.0203028
0.723117	-0.00298023	0.0245795	0.00325218	0.00364333	0.0119135	0.0156015	0.0208244
0.723533	-0.00254065	0.0282824	0.00303984	0.00435114	0.00909716	0.0153407	0.0217557
0.72395	-0.00227243	0.0313595	0.00211224	0.0032112	0.00697374	0.0155047	0.0227019
0.724367	-0.00230223	0.0321344	0.00110641	0.000879169	0.00592321	0.0151023	0.022836
0.724783	-0.00243634	0.0304356	0.000547618	-0.000730157	0.00564009	0.0154004	0.0220761
0.7252	-0.00235438	0.0272691	0.000363216	-0.000886619	0.00607222	0.0170916	0.0211373
0.725617	-0.00226498	0.0238642	0.000318512	-0.000417233	0.00650436	0.0192747	0.0208244
0.726033	-0.00157952	0.0206158	1.11759e-05	0.000797212	0.006482	0.020735	0.0217557
0.72645	-0.000335276	0.0175014	-0.000335276	0.00340492	0.00625849	0.0212193	0.0233576
0.726867	0.00109523	0.0150874	-0.000720844	0.00674278	0.0057593	0.0217184	0.0250041
0.727283	0.00278652	0.0139028	-0.00140816	0.00894815	0.00511855	0.02186	0.0264123
0.7277	0.00435114	0.0138357	-0.00234134	0.0089705	0.00403822	0.0212565	0.0269189
0.728117	0.00549108	0.0140965	-0.00279956	0.00774115	0.00280142	0.0199527	0.0261515
0.728533	0.00523031	0.0142083	-0.00241399	0.00597537	0.00189245	0.018768	0.0240207
0.72895	0.00409782	0.0142157	-0.00197254	0.00377744	0.00134855	0.0181794	0.0213832
0.729367	0.003241	0.0142232	-0.002224	0.00127405	0.00122935	0.0177994	0.0193864
0.729783	0.00261515	0.0137538	-0.00308454	-0.000409782	0.00133365	0.0172928	0.0184476
0.7302	0.00209361	0.0127926	-0.00357069	-0.00102073	0.00151247	0.0167713	0.0185296
0.730617	0.00156462	0.0117198	-0.00362657	-0.0012815	0.00217557	0.0167638	0.0190064
0.731033	0.00178069	0.0105947	-0.003336	-0.00155717	0.00275671	0.0167266	0.0195131
0.73145	0.00222027	0.00899285	-0.00243634	-0.00173599	0.00252575	0.016816	0.0202209
0.731867	0.0019446	0.0071004	-0.000832602	-0.00169873	0.00108033	0.0177845	0.0211
0.732283	0.000961125	0.00662357	0.00117347	-0.00218302	-0.000968575	0.0199229	0.0214875
0.7327	-0.000491738	0.00827014	0.00241958	-0.00277162	-0.00196695	0.0226498	0.0209734
0.733117	-0.00146031	0.0108406	0.00250898	-0.00320375	-0.00133365	0.0245273	0.0201538
0.733533	-0.00236183	0.0130236	0.00164285	-0.00400096	0.00107288	0.0250563	0.0202432
0.73395	-0.00378489	0.0148043	0.000240281	-0.0057295	0.00459701	0.0245199	0.0213608
0.734367	-0.00537932	0.0165626	-0.00116229	-0.00784546	0.00863522	0.0235364	0.0227317
0.734783	-0.00683963	0.017412	-0.00217371	-0.00915676	0.0123978	0.0225306	0.0244081
0.7352	-0.00762194	0.0164658	-0.00220724	-0.0096634	0.0146106	0.0215545	0.0264421
0.735617	-0.00856817	0.0145584	-0.0014361	-0.00946224	0.0140741	0.0208095	0.0283048
0.736033	-0.0096336	0.0129044	-0.000217929	-0.00888109	0.0106767	0.0206903	0.0293478
0.73645	-0.0102147	0.0119433	0.00113435	-0.00803173	0.00614673	0.0212193	0.0296682
0.736867	-0.0105649	0.0112057	0.00237487	-0.00736862	0.00200421	0.0215471	0.03016
0.737283	-0.0105649	0.0105351	0.00310689	-0.00712275	-0.000707805	0.0211746	0.030756
0.7377	-0.0101253	0.0103936	0.00277162	-0.00677258	-0.00166148	0.020504	0.0307038
0.738117	-0.00913441	0.0106469	0.00196695	-0.0063777	-0.000372529	0.0201985	0.0299513
0.738533	-0.00824034	0.011079	0.00136346	-0.0057146	0.00286102	0.0206307	0.028722
0.73895	-0.00750273	0.0115633	0.0012517	-0.00481307	0.00625104	0.0210628	0.0274479
0.739367	-0.00631809	0.0122711	0.00135228	-0.0038296	0.00899285	0.0209436	0.0259131
0.739783	-0.0051856	0.0131801	0.00136904	-0.00323355	0.0104085	0.0202283	0.0241995
0.7402	-0.00513345	0.0139698	0.00146963	-0.00343472	0.010848	0.0193268	0.0230968
0.740617	-0.00595301	0.0147522	0.00135228	-0.0038594	0.0103712	0.0189692	0.0226051
0.741033	-0.00631809	0.0155717	0.000581145	-0.00389665	0.00929087	0.0190437	0.0225306
0.74145	-0.00596791	0.016585	-0.000977889	-0.00370294	0.00856817	0.0192523	0.0228211
0.741867	-0.00584871	0.0174195	-0.00294484	-0.00352412	0.00826269	0.0192523	0.0239909
0.742283	-0.00614673	0.0176057	-0.0044927	-0.00294298	0.00845641	0.0190958	0.025332
0.7427	-0.00625104	0.0170097	-0.00524148	-0.00192225	0.00812858	0.0187755	0.0257418
0.743117	-0.00544637	0.0158548	-0.00524148	-0.00110269	0.00683218	0.0180602	0.0253096
0.743533	-0.004448	0.0150427	-0.00470504	-0.00127405	0.00526756	0.0168756	0.0246763
0.74395	-0.00374019	0.0151023	-0.00395626	-0.00237674	0.00414997	0.0156537	0.0239164
0.744367	-0.00292808	0.0160933	-0.003336	-0.00398606	0.00364333	0.015147	0.022307
0.744783	-0.00206381	0.0175312	-0.00293925	-0.00674278	0.003241	0.0157058	0.0208542
0.7452	-0.00151247	0.0186488	-0.00298396	-0.0104085	0.00347942	0.0169724	0.0205711
0.745617	-0.00187755	0.0193119	-0.00331923	-0.0137687	0.0051409	0.0181049	0.0207797
0.746033	-0.00247359	0.019528	-0.00349805	-0.015296	0.00722706	0.0190586	0.0206828
0.74645	-0.00349432	0.0195503	-0.00316277	-0.0144169	0.00885129	0.0203475	0.0204965
0.746867	-0.00523776	0.019297	-0.00230223	-0.0124127	0.00987202	0.0213236	0.0209659
0.747283	-0.00666082	0.0186861	-0.00173226	-0.00997633	0.011079	0.0209957	0.0214353
0.7477	-0.00662357	0.0181943	-0.00151433	-0.00756979	0.0122115	0.0199005	0.0212044
0.748117	-0.005126	0.0179037	-0.00169314	-0.00564009	0.0120848	0.0193641	0.020951
0.748533	-0.00374764	0.017114	-0.00233576	-0.00457466	0.0113919	0.0191629	0.0214428
0.74895	-0.00257045	0.0151768	-0.00340305	-0.00462681	0.0107512	0.0182018	0.0226051
0.749367	-0.00181794	0.0130013	-0.00465475	-0.00505149	0.0103936	0.017263	0.0240132
0.749783	-0.00230223	0.0121593	-0.00523031	-0.00561029	0.0100136	0.0178888	0.0255555
0.7502	-0.00406057	0.0129417	-0.00513531	-0.00631809	0.00973046	0.0194088	0.0267774
0.750617	-0.00624359	0.0144467	-0.00489503	-0.00675023	0.0105873	0.0203326	0.0271499
0.751033	-0.00746548	0.0162795	-0.00520796	-0.00734627	0.0124425	0.0210255	0.0266954
0.75145	-0.00761449	0.0182092	-0.00618026	-0.00803173	0.014253	0.02224	0.0253618
0.751867	-0.00656396	0.0194982	-0.00700168	-0.00851601	0.0150427	0.0231564	0.0233799
0.752283	-0.00458956	0.019893	-0.00728667	-0.00799447	0.0147074	0.0227615	0.0213459
0.7527	-0.00283122	0.0194535	-0.00723079	-0.00628084	0.0142381	0.0220239	0.0205114
0.753117	-0.00210851	0.0186339	-0.00695139	-0.00473857	0.013724	0.0219196	0.0212491
0.753533	-0.0026077	0.0174344	-0.00611879	-0.00366569	0.0121891	0.0216663	0.0221878
0.75395	-0.0037998	0.0161603	-0.00485592	-0.00309199	0.00987202	0.0204816	0.0229701
0.754367	-0.00553578	0.0155345	-0.00391714	-0.00258535	0.00831485	0.0192747	0.0239089
0.754783	-0.00775605	0.014849	-0.00372157	-0.00235438	0.00827014	0.0191405	0.0249147
0.7552	-0.00995398	0.013791	-0.00381097	-0.00312179	0.00877678	0.0188798	0.0254214
0.755617	-0.0112951	0.012666	-0.00367127	-0.00418723	0.00876188	0.0178441	0.0255406
0.756033	-0.0115409	0.0124052	-0.00327453	-0.00473112	0.00867248	0.0169724	0.0260323
0.75645	-0.0110716	0.0131279	-0.00244193	-0.00455976	0.00870228	0.0175461	0.0263005
0.756867	-0.0100583	0.0135154	-0.00114553	-0.00452995	0.00803918	0.0193119	0.0252426
0.757283	-0.00890344	0.0139028	-0.000173226	-0.00513345	0.00650436	0.0208095	0.0232235
0.7577	-0.00797957	0.0144839	-0.000296161	-0.00602007	0.00505894	0.0220686	0.0216514
0.758117	-0.00782311	0.0151917	-0.00113994	-0.00716001	0.0051409	0.0230595	0.0205487
0.758533	-0.00798702	0.0153258	-0.0018049	-0.00867248	0.00678748	0.0236109	0.0194907
0.75895	-0.00824779	0.0149384	-0.002129	-0.01055	0.00891834	0.0237003	0.0186414
0.759367	-0.00903755	0.0151768	-0.00269897	-0.0126734	0.0106171	0.0231117	0.0184551
0.759783	-0.00949949	0.0154227	-0.00340305	-0.0145286	0.0117794	0.0219494	0.0190288
0.7602	-0.00902265	0.0156984	-0.00381097	-0.0149459	0.0120923	0.0200719	0.0197217
0.760617	-0.00772625	0.0158995	-0.00393391	-0.0136197	0.0109673	0.018321	0.0206158
0.761033	-0.00679493	0.0159964	-0.00414066	-0.0117496	0.00880659	0.0175014	0.0216439
0.76145	-0.00672042	0.0161901	-0.00455976	-0.01055	0.00713766	0.0173673	0.0227541
0.761867	-0.00683963	0.0167489	-0.00473298	-0.00954419	0.00681728	0.0175908	0.0242516
0.762283	-0.00733137	0.0182837	-0.00445917	-0.00804663	0.00736862	0.0182539	0.0260398
0.7627	-0.0082776	0.0200272	-0.00388361	-0.00672042	0.0083968	0.0196844	0.0272766
0.763117	-0.00930578	0.0212193	-0.00360981	-0.00612438	0.00997633	0.0212863	0.027284
0.763533	-0.0103861	0.0220239	-0.00376068	-0.00559539	0.0118911	0.0221431	0.0263453
0.76395	-0.0115484	0.0222474	-0.00391155	-0.00438094	0.0132248	0.0219718	0.0251606
0.764367	-0.0125989	0.02148	-0.00369362	-0.00289083	0.0137985	0.0213832	0.0237748
0.764783	-0.0128448	0.019893	-0.00308454	-0.00219047	0.0138506	0.0207797	0.0216886
0.7652	-0.0124425	0.0183508	-0.00215136	-0.00245869	0.0138581	0.020273	0.019066
0.765617	-0.0121072	0.0177175	-0.000631437	-0.0032708	0.0135824	0.019908	0.0166222
0.766033	-0.0114143	0.0178814	0.000871718	-0.00422448	0.0128374	0.0193194	0.0150874
0.76645	-0.00974536	0.0182316	0.00163168	-0.00464171	0.0119135	0.0184104	0.014931
0.766867	-0.00707805	0.0184476	0.00151433	-0.00445545	0.0110045	0.0172704	0.0162274
0.767283	-0.00458211	0.0182763	0.000949949	-0.00369549	0.0105277	0.0160709	0.0187457
0.7677	-0.00303239	0.0181273	0.000251457	-0.00294298	0.0100061	0.0147074	0.0218078
0.768117	-0.00252575	0.0182912	-0.000547618	-0.0025928	0.00932813	0.0133663	0.0244752
0.768533	-0.00278652	0.0188798	-0.00116229	-0.00265241	0.00874698	0.0128672	0.0262335
0.76895	-0.00303984	0.0198185	-0.0014808	-0.00336021	0.00869483	0.0133738	0.0266805
0.769367	-0.0032708	0.0202954	-0.00165962	-0.00423938	0.00928342	0.0138506	0.0258088
0.769783	-0.00336766	0.0205562	-0.00167638	-0.00481307	0.00965595	0.0138208	0.0241101
0.7702	-0.00339001	0.0208169	-0.00161491	-0.00488013	0.00994652	0.0140816	0.0223443
0.770617	-0.0032112	0.0206307	-0.00163726	-0.00465661	0.0107214	0.0150278	0.0213385
0.771033	-0.00307709	0.0197515	-0.00136346	-0.0039041	0.0121444	0.0160486	0.0212342
0.77145	-0.00354648	0.0185892	-0.000424683	-0.00227243	0.0134334	0.0164211	0.0213981
0.771867	-0.00433624	0.0182688	0.000553206	-0.000715256	0.0140965	0.016503	0.0211075
0.772283	-0.00540167	0.0187531	0.000715256	-0.000536442	0.0147671	0.0169501	0.0200719
0.7727	-0.00653416	0.0191182	0.000631437	-0.00172108	0.0149161	0.01771	0.0188649
0.773117	-0.00741333	0.0190213	0.00126287	-0.00301003	0.0141859	0.0181645	0.0179484
0.773533	-0.0077039	0.018388	0.00232458	-0.00389665	0.0127926	0.0180975	0.0167415
0.77395	-0.00719726	0.0175238	0.00278279	-0.00430644	0.0119656	0.0179112	0.0152737
0.774367	-0.00666082	0.0171065	0.00303984	-0.00406057	0.0120327	0.0180379	0.0145137
0.774783	-0.00610203	0.0173151	0.00389479	-0.00317395	0.0120625	0.0183955	0.015378
0.7752	-0.00506639	0.0180677	0.00487268	-0.00166148	0.0123307	0.0184104	0.017345
0.775617	-0.00368804	0.0190437	0.00504591	1.49012e-05	0.0131205	0.0183433	0.0190884
0.776033	-0.00266731	0.0200942	0.00412948	0.0013113	0.0142977	0.0187084	0.0204667
0.77645	-0.00279397	0.0211224	0.00293925	0.0012368	0.0148788	0.0193194	0.021778
0.776867	-0.00360608	0.0216216	0.00205636	-0.000104308	0.0145733	0.0197217	0.0225976
0.777283	-0.0044629	0.0212714	0.00158139	-0.00153482	0.0137314	0.0195354	0.0225604
0.7777	-0.00570715	0.0197664	0.00143051	-0.00275671	0.0119358	0.0191629	0.0220612
0.778117	-0.00783056	0.0175461	0.00132434	-0.00406802	0.00919402	0.0186265	0.0218302
0.778533	-0.0102669	0.0155047	0.00144169	-0.00541657	0.00637025	0.0177994	0.0218004
0.77895	-0.0117272	0.0138506	0.00190549	-0.00608712	0.00456721	0.017263	0.0216067
0.779367	-0.0117496	0.012368	0.00273809	-0.00628084	0.00438094	0.0171214	0.0215024
0.779783	-0.0114143	0.011161	0.0036601	-0.00624359	0.00554323	0.017345	0.0219718
0.7802	-0.0115335	0.0110567	0.00428595	-0.00558793	0.00791252	0.0174418	0.0227466
0.780617	-0.0115111	0.0119507	0.00475533	-0.00426173	0.0104383	0.01733	0.0234023
0.781033	-0.0106916	0.0129268	0.00534207	-0.00310689	0.0117868	0.0170618	0.0240505
0.78145	-0.00976026	0.0138953	0.0062529	-0.00282377	0.0115857	0.0158995	0.0248849
0.781867	-0.00974536	0.0150949	0.00701286	-0.00272691	0.0104904	0.0141412	0.0259355
0.782283	-0.0103563	0.0166371	0.0068061	-0.00216067	0.00953674	0.0127107	0.0262484
0.7827	-0.0104606	0.0180155	0.00564381	-0.00114739	0.00871718	0.0122562	0.0256449
0.783117	-0.00993162	0.019148	0.00399537	0.000201166	0.00777841	0.0124723	0.024572
0.783533	-0.00954419	0.0204816	0.00233017	0.0019595	0.00695139	0.0126809	0.0236332
0.78395	-0.00962615	0.021331	0.000620261	0.00415742	0.00616908	0.0136793	0.0233874
0.784367	-0.010103	0.0210926	-0.00105053	0.00626594	0.0044927	0.0160486	0.0230297
0.784783	-0.01093	0.0194982	-0.00195019	0.0076443	0.00156462	0.0189468	0.0226498
0.7852	-0.0117645	0.0174195	-0.00167638	0.00806898	-0.00111014	0.0210032	0.0220537
0.785617	-0.012286	0.0159219	-0.000441447	0.00759214	-0.00222772	0.0218153	0.021182
0.786033	-0.0124052	0.0150204	0.0011567	0.00667572	-0.00216067	0.0218078	0.020355
0.78645	-0.0127107	0.0144616	0.00283308	0.00562519	-0.00141561	0.020951	0.019379
0.786867	-0.0130609	0.0135675	0.00444241	0.00423193	0.000491738	0.0190586	0.0186712
0.787283	-0.0125095	0.0124052	0.00561588	0.00241399	0.00363588	0.0165477	0.017859
0.7877	-0.0111163	0.0115111	0.00596791	0.00026077	0.00640005	0.0143424	0.0174642
0.788117	-0.00948459	0.0111386	0.00556558	-0.00181794	0.00791252	0.012584	0.0178516
0.788533	-0.00856072	0.0113621	0.0049118	-0.0032112	0.0090301	0.0112206	0.0180453
0.78895	-0.00793487	0.0121668	0.00424124	-0.00389665	0.0102669	0.0106469	0.0173897
0.789367	-0.00717491	0.0137836	0.00371598	-0.0039041	0.0110269	0.0112653	0.0166073
0.789783	-0.00692904	0.0161901	0.00347011	-0.00380725	0.0111759	0.0126362	0.016965
0.7902	-0.00753254	0.0180602	0.00365451	-0.00394881	0.0117049	0.013791	0.0182465
0.790617	-0.00856072	0.018388	0.00407361	-0.00429153	0.0132024	0.0149384	0.0193566
0.791033	-0.00890344	0.017345	0.00419654	-0.00537932	0.0149533	0.0166968	0.0200495
0.79145	-0.00885129	0.0162721	0.00355393	-0.00670552	0.0164881	0.0182912	0.0211522
0.791867	-0.00913441	0.016652	0.00217371	-0.00771135	0.0179484	0.0182241	0.0226945
0.792283	-0.00934303	0.0182241	0.000609085	-0.00818074	0.0189692	0.0167862	0.0239983
0.7927	-0.00869483	0.0200644	-0.000603497	-0.00841171	0.0193715	0.0157207	0.0246987
0.793117	-0.00731647	0.0213683	-0.0012517	-0.00860542	0.0193119	0.0153184	0.02487
0.793533	-0.00625104	0.021942	-0.00140816	-0.00794232	0.0189766	0.0146031	0.0247806
0.79395	-0.00552088	0.0214577	-0.0010673	-0.00674278	0.0182986	0.0134781	0.0241175
0.794367	-0.00477582	0.0186339	-0.000452623	-0.00624359	0.0173971	0.0126958	0.0225753
0.794783	-0.00417978	0.0137836	0.000296161	-0.00663102	0.0168681	0.0118911	0.0205562
0.7952	-0.00403822	0.00916421	0.00123493	-0.00684708	0.0163242	0.0101328	0.0187531
0.795617	-0.00450015	0.00651181	0.00239164	-0.00619888	0.0149757	0.00802428	0.0180826
0.796033	-0.00537187	0.00559539	0.00344217	-0.00528991	0.0133216	0.00680238	0.018701
0.79645	-0.00679493	0.00555068	0.00403449	-0.00488013	0.012435	0.00674278	0.019677
0.796867	-0.00809878	0.0064075	0.00420213	-0.00455231	0.0128746	0.00725687	0.0208095
0.797283	-0.00860542	0.00812858	0.00418536	-0.00393391	0.0140965	0.0083521	0.0224262
0.7977	-0.00863522	0.00958145	0.00400096	-0.00372529	0.0154823	0.0106543	0.0242367
0.798117	-0.00861287	0.00993162	0.00386685	-0.00470132	0.0168979	0.0139475	0.0254214
0.798533	-0.00858307	0.00946224	0.00398979	-0.00664592	0.0181198	0.0171587	0.025712
0.79895	-0.00771135	0.0090152	0.00445359	-0.00868738	0.0186935	0.0193119	0.0260845
0.799367	-0.00632554	0.00919402	0.00537001	-0.0103116	0.0186488	0.0207499	0.0266284
0.799783	-0.00506639	0.0101626	0.00637025	-0.0111833	0.0184104	0.0217184	0.0267774
0.8002	-0.00427663	0.0117943	0.00723638	-0.0111461	0.0185519	0.0213832	0.0265315
0.800617	-0.00388175	0.0140294	0.00725873	-0.010401	0.0193343	0.0194013	0.026159
0.801033	-0.00326335	0.0165403	0.00619702	-0.0095889	0.0200123	0.0169724	0.0260845
0.80145	-0.00205636	0.0187159	0.00452064	-0.00907481	0.0202954	0.0155494	0.0260696
0.801867	5.21541e-05	0.0201091	0.00278838	-0.00824034	0.019826	0.0148863	0.0258684
0.802283	0.00212342	0.0205114	0.00160932	-0.0070408	0.0185519	0.0142604	0.025183
0.8027	0.00326335	0.0199154	0.00100583	-0.00603497	0.0167638	0.0137389	0.0240579
0.803117	0.00339747	0.018388	0.00107288	-0.00562519	0.0151023	0.0136644	0.0232831
0.803533	0.0031665	0.0168234	0.00183843	-0.00523776	0.0145808	0.01394	0.0227317
0.80395	0.00219047	0.015825	0.00298955	-0.00420958	0.0151694	0.0146776	0.0217184
0.804367	8.9407e-05	0.015296	0.00389479	-0.00300258	0.0159964	0.0160336	0.0198856
0.804783	-0.00245869	0.0146925	0.00423007	-0.00171363	0.016354	0.0176877	0.0180304
0.8052	-0.00470877	0.0143275	0.00432506	0.000506639	0.0165179	0.0190362	0.0175834
0.805617	-0.00604987	0.0146106	0.00436418	0.00371039	0.0166669	0.0196621	0.0181049
0.806033	-0.00725687	0.014998	0.00420213	0.00640005	0.0165403	0.0196248	0.0182614
0.80645	-0.00804663	0.0148416	0.00359863	0.00769645	0.015758	0.0186339	0.0180379
0.806867	-0.00817329	0.0138581	0.00302307	0.00797957	0.0141636	0.0167191	0.0187755
0.807283	-0.00766665	0.0128374	0.00284426	0.00798702	0.0122115	0.0147223	0.0209287
0.8077	-0.006482	0.0119507	0.00253692	0.00715256	0.0101551	0.0139698	0.0230521
0.808117	-0.00538677	0.0111088	0.00169873	0.00539422	0.0083223	0.0151768	0.0239238
0.808533	-0.0044927	0.0102594	0.000447035	0.00327825	0.00714511	0.0175238	0.0239462
0.80895	-0.00409782	0.00947714	-0.000273809	0.00130385	0.00674278	0.0196621	0.0236407
0.809367	-0.0045225	0.00955164	-0.000357628	-0.000149012	0.00750273	0.0207648	0.0227615
0.809783	-0.0058189	0.0108927	-0.000530854	-0.0012815	0.00891834	0.0205487	0.0211969
0.8102	-0.00791252	0.013195	-0.00105053	-0.00216812	0.00980496	0.0188872	0.0192523
0.810617	-0.010103	0.0153631	-0.00125728	-0.00309199	0.00953674	0.0160709	0.0177771
0.811033	-0.0119954	0.0163242	-0.000223517	-0.00371039	0.00834465	0.0130162	0.0179484
0.81145	-0.0134781	0.0162274	0.00164844	-0.00343472	0.00678003	0.0107661	0.0195578
0.811867	-0.0143424	0.01546	0.00353716	-0.00274181	0.00516325	0.00996888	0.0213757
0.812283	-0.0142753	0.0138581	0.00504591	-0.00255555	0.00392646	0.0108555	0.0226796
0.8127	-0.0134707	0.0119582	0.00588968	-0.00296533	0.00407547	0.0134483	0.0236332
0.813117	-0.0125095	0.0108331	0.00565499	-0.00278652	0.00590086	0.0162572	0.0244454
0.813533	-0.0117049	0.0112355	0.00420771	-0.00136346	0.00829995	0.0177696	0.0244305
0.81395	-0.0111833	0.0123531	0.00229105	0.000156462	0.0104085	0.0179112	0.0239909
0.814367	-0.0110865	0.013113	0.00103936	0.000692904	0.0121221	0.0178516	0.0241473
0.814783	-0.01169	0.0135228	0.00105053	0.000476837	0.0141189	0.0180304	0.0247732
0.8152	-0.0126064	0.0137016	0.00213459	-8.9407e-05	0.0161007	0.0175908	0.0250041
0.815617	-0.0133365	0.0134036	0.0037048	-0.00108033	0.0175238	0.0169873	0.0245944
0.816033	-0.0137985	0.0127256	0.00544824	-0.00292063	0.0185966	0.0169054	0.0237748
0.81645	-0.0141785	0.0123754	0.00725873	-0.00523031	0.019215	0.0173375	0.0225827
0.816867	-0.0143871	0.012368	0.00860542	-0.00686944	0.0193864	0.0171661	0.0209212
0.817283	-0.0140071	0.0123978	0.00871718	-0.00721216	0.0189394	0.016287	0.0188798
0.8177	-0.0130981	0.0121444	0.00780635	-0.00617653	0.0182167	0.0155047	0.0170842
0.818117	-0.0116676	0.0118092	0.00688992	-0.00482798	0.0170767	0.0147969	0.0160784
0.818533	-0.00985712	0.0114739	0.00610203	-0.00335276	0.0154525	0.0143647	0.0160411
0.81895	-0.00765175	0.0113025	0.00510737	-0.00145286	0.0139773	0.0145435	0.0165775
0.819367	-0.00543147	0.0118539	0.00381656	8.19564e-05	0.012815	0.0156686	0.0171363
0.819783	-0.00382215	0.0126585	0.00291131	0.00038743	0.0115782	0.0170916	0.0180602
0.8202	-0.00277907	0.0126734	0.00263192	-0.000558794	0.0101849	0.0178665	0.0196025
0.820617	-0.00245124	0.0118837	0.00241399	-0.000916421	0.00939518	0.0179783	0.0209287
0.821033	-0.00287592	0.01169	0.00206754	-0.000670552	0.00965595	0.0177845	0.0216663
0.82145	-0.00398606	0.0126362	0.00144169	-0.00110269	0.0106171	0.0169352	0.0220984
0.821867	-0.00531972	0.0136867	0.000558794	-0.00193715	0.0116006	0.0153705	0.0224113
0.822283	-0.006482	0.0144616	-0.000458211	-0.00242144	0.0124946	0.0135452	0.0221208
0.8227	-0.00789762	0.0157654	-0.00131317	-0.00263751	0.0133291	0.0127926	0.0207275
0.823117	-0.00987202	0.0174791	-0.00192784	-0.00405312	0.0135526	0.0135303	0.0197217
0.823533	-0.0121221	0.0177324	-0.00231899	-0.0063777	0.0128001	0.0143796	0.020124
0.82395	-0.0141934	0.0157952	-0.00259839	-0.00741333	0.011608	0.0150949	0.0210181
0.824367	-0.0154823	0.0132695	-0.00291131	-0.00621378	0.0111237	0.0161454	0.0216365
0.824783	-0.0159666	0.0114962	-0.00337511	-0.00328571	0.0116006	0.0180453	0.0216439
0.8252	-0.0157952	0.0101551	-0.00373833	0.000193715	0.0121742	0.019744	0.0214726
0.825617	-0.0149459	0.00917167	-0.00360981	0.00365824	0.0128224	0.0198707	0.0204593
0.826033	-0.0133514	0.00888854	-0.00325218	0.00683963	0.0137538	0.0192001	0.0181794
0.82645	-0.0113621	0.00920147	-0.00301748	0.00867993	0.0148118	0.0188649	0.0160858
0.826867	-0.0102594	0.00938028	-0.00271574	0.00875443	0.0154749	0.0195503	0.0154823
0.827283	-0.0103414	0.00949204	-0.00217929	0.00720471	0.0157207	0.0204742	0.0167787
0.8277	-0.0107139	0.0106022	-0.00164844	0.00506639	0.0157878	0.0211	0.0190288
0.828117	-0.01055	0.0122413	-0.00138022	0.003241	0.0152886	0.021629	0.0214502
0.828533	-0.010483	0.0137016	-0.00122376	0.00172108	0.0144392	0.0219569	0.0238791
0.82895	-0.0108555	0.0150055	-0.000748783	0.000685453	0.0135824	0.0218973	0.0262484
0.829367	-0.0110492	0.016503	-0.000139698	-2.98023e-05	0.0129193	0.0208691	0.0280365
0.829783	-0.0109226	0.0179112	0.000318512	-0.000275671	0.0122786	0.0193939	0.0286326
0.8302	-0.0111759	0.0182465	0.000586733	7.45058e-06	0.0118762	0.0179559	0.0282004
0.830617	-0.0122339	0.0175461	0.000793487	0.000789762	0.0121072	0.017114	0.0270829
0.831033	-0.0130385	0.0169203	0.000927597	0.00211597	0.0124201	0.0169203	0.0259131
0.83145	-0.0128299	0.0169724	0.000709668	0.00356883	0.0121221	0.0166371	0.0247508
0.831867	-0.0124946	0.0174865	0.000223517	0.00457466	0.0110716	0.0163391	0.0238344
0.832283	-0.0127628	0.0176132	-0.000307336	0.00496209	0.00979751	0.0160187	0.0236407
[truncated: 24,402 more rows]
[truncated: 24 more columns]

## Sheet: Figure 6
Figure 6A
	E642A	E642A G601P
0	17.5	60		Figure 6E
1	16.5	28			control			citrate
2	8	5.5			mean	SEM	N	mean	SEM	N
3	7	2.4			16.8	1.5	44	16.4	0.9	55
4	6.5	1.08
5	6.4	0.68		Figure 6F/G
6	6	0.5			control			citrate
7	6.1	0.7			mean	SEM	N	mean	SEM	N
8	5.5	0.45			58.42	3.45	739	84.83	4.03	902
9	5	0.48
10	4	0.28		Figure 6I
11	3	0.4				2-3 hours				24 hours
12	2.75	0.2				mean	UL	LL	N	mean	UL	LL	N
13	1.7	0.16			citrate	8.75	14.25	5.18	160	15.63	22.98	10.27	128
14	1.3	0.2			control	15.1	20.9	10.68	192	32.56	41	25.06	128
15	0.9	0.13
16	0.43	0.15		Figure 6K
17	0.4	0.1				percent	UL	LL
18	0.25	0.13			intact	1.875	0.39	5.62
19	0.15	0.045			damaged	98.125	94.38	99.61
20	0.1	0.03			total N	160
21	0.05	0.043
22	0.07
23	0.035
24	0.01
26	0.012
28	0.01

## Sheet: Figure 2-figure supplement 1
Panel A				Panel B	Glycerol	PEG 3350
	Glycerol	PEG 3350		0%	1	1
10%	1.233	2.8		10%	1	163.698
20%	1.8	6.434		20%	2.16981	1519.89
25%	2.25	9.9		30%	3.9434	1996.87
30%	2.7	17.66		48%	32.3019
50%	7.3	ND		55%	25.8868
Panel C
[SARMTIR] (µM)	10% PEG 3350			12.5% PEG 3350			15% PEG 3350			17.5% PEG 3350			20% PEG 3350			25% PEG 3350
	Mean	Standard Deviation	N	Mean	Standard Deviation	N	Mean	Standard Deviation	N	Mean	Standard Deviation	N	Mean	Standard Deviation	N	Mean	Standard Deviation	N
20	2.65015	0.0666064	2	4.24525	0.138865	2	7.48079	0	2	8.14797	0.226153	2	8.07657	1.52645	2	8.75602	0.307147	2
15	2.58184	0.366945	2			2
10	0.514007	0.0523987	2	1.28558	0.00488147	2	2.34762	0.043034	2	3.93414	0.620975	2	4.34236	0.8382	2	5.54224	0.257626	2
7.5	0.124779	0.0735573	2	0.490689	0.0316011	2
5	0.0461931	0.0316473	2	0.119271	0.00350053	2	0.154469	0.0689251	2	0.526242	0.127625	2	1.74276	0.0435479	2	2.92942	0.0183697	2
2.5				0.00882778	7.00106e-05	2	0.0133527	0.00552891	2	0.0378277	0.000863892	2	0.111168	0.0234246	2	1.10696	0.192882	2
1							0.00130257	0.00184211	2	0.00151826	0.00214714	2	0.0279971	0.0105632	2	0.074559	0.00394757	2
0.5																0.0229499	0.00632729	2
0.25																0.0129276	0.00520904	2
Panel D
PEG 3350 (%)	Hill slope
	Mean	Standard Deviation	N
0	3.848	0.3	2
12.5	3.956	0.15	2
15	4.365	0.2178	2
17.5	3.65	0.47	2
20	2.055	0.3	2
25	1.552	0.1126	2

## Sheet: Figure 2-figure supplement 2
Panel A
	Lysate			Pure
	Mean Percentage Activity	Standard Deviation	N	Mean Percentage Activity	Standard Deviation	N	Mean Percentage Activity	Standard Deviation	N
Control							100	1.71827	2
Ca	120.809	4.7366	2	152.768	8.92369	2
Cd	73.9884	2.20971	2	6.14012	0.834386	2
Co	72.8489	17.4457	2	3.33246	0.26163	2
Cu	72.2543	3.39411	2	5.72028	0.509117	2
Mg	97.1098	3.36718	2	86.6439	6.71751	2
Mn	125	28	4	104.776	2.49609	2
Ni	0	0	2	0	0	2
Zn	0	0	2	0	0	2
EDTA	92.4855	7.07107	2	111.178	1.74655	2
Panel B
	CdCl2			CuCl2
[SARMTIR] (nM)	Mean	Standard Deviation	N	Mean	Standard Deviation	N
500	190	20	2	340	40	2
1000	430	40	2	450	15	2
2500	860	70	2	910	80	2

## Sheet: Figure 3-figure supplement 1
Panel A					Panel B
[Sodium Citrate] (M)	Mean	Standard Deviation	N				PEG 3350			Citrate
0.1	0	0	2				Mean	Standard Deviation	N	Mean	Standard Deviation	N
0.25	0	0	2			Control	0.65581	0.0118653	2	0.2759	0.014425	2
0.5	0.4607	0	2			Supernatant	5e-05	7.07107e-05	2	0.0009	0.00127279	2
0.75	0.5789	0.00989949	2			Precipitate + Buffer	0.0032	0.000141421	2	0.0008	0.00113137	2
1	0.7033	0.0100409	2			Precipitate + Additive	0.33515	0.0140714	2	0.11215	0.00968736	2
Panel C							Panel D
	Supernatant			Precipitate				Supernatant			Precipitate
	Mean	Standard Deviation	N	Mean	Standard Deviation	N		Mean	Standard Deviation	N	Mean	Standard Deviation	N
No PEG	99.5869	0	2	0.413067	0	2	No Citrate	100	0	2	0	0	2
PEG	22.2621	10	2	77.7379	10	2	Citrate	35.5914	0.798295	2	64.4086	0.798295	2
PEG + Zn	15.7778	10	2	84.2222	10	2	Citrate + Zn	37.8371	7.03597	2	62.1629	7.03597	2
PEG + NMN	22.8421	10	2	77.1579	10	2	Citrate + NMN	34.0994	4.19493	2	65.9006	4.19493	2
PEG + Ca	23	10	2	76	10	2	Citrate + Ca	34.9299	9.4058	2	65.0701	9.4058	2
PEG + Beberine	16.7438	10	2	83.2562	10	2	Citrate + Berberine	33.5544	3.93207	2	66.4456	3.93207	2

## Sheet: Figure 5-figure supplement 1
Panel A							Panel B
	0 min	15 min	40 min	90 min	120 min			0 min	10 min	35 min	60 min	120 min	150 min
0.0002	-0.0171885	-0.00884384	-0.00309944	-0.000119209	-0.00231713		0.0002	-0.0196174	-0.0143275	-0.0162274	-0.00804663	-0.0104588	-0.0248328
0.000616667	-0.0147372	-0.00718981	-0.00225007	0.00117719	-0.0019297		0.000616667	-0.0191331	-0.0137463	-0.0163689	-0.0070855	-0.0111386	-0.0214018
0.00103333	-0.0123829	-0.00593066	-0.00125915	0.00246614	-0.00111759		0.00103333	-0.0185147	-0.0132769	-0.0163764	-0.0057891	-0.0114925	-0.0186749
0.00145	-0.0106543	-0.00474602	5.96046e-05	0.00341237	-9.68575e-05		0.00145	-0.0171587	-0.0130609	-0.0151843	-0.00429153	-0.0111479	-0.0161156
0.00186667	-0.0102818	-0.00331551	0.00186265	0.00355393	0.00100583		0.00186667	-0.0154376	-0.0128374	-0.0131652	-0.00266731	-0.0103191	-0.0133105
0.00228333	-0.0112355	-0.00175834	0.00383705	0.0032708	0.00211597		0.00228333	-0.014402	-0.0120997	-0.0113174	-0.000908971	-0.00908039	-0.0109859
0.0027	-0.0127777	-0.000759959	0.00547618	0.00286102	0.00366569		0.0027	-0.0144169	-0.0109598	-0.0104085	0.000678003	-0.00719912	-0.0096783
0.00311667	-0.0136197	-0.000976026	0.00661612	0.00208616	0.00582635		0.00311667	-0.0149608	-0.00993908	-0.00999123	0.00178814	-0.00458211	-0.00880659
0.00353333	-0.0134185	-0.00263751	0.00762194	0.0012368	0.00774115		0.00353333	-0.0151619	-0.00885129	-0.00902265	0.00257045	-0.00179745	-0.00752136
0.00395	-0.013046	-0.00503659	0.00853092	0.00121444	0.00842661		0.00395	-0.0149459	-0.00761449	-0.0076443	0.00328571	0.00108033	-0.00654906
0.00436667	-0.0131428	-0.00668317	0.00917911	0.00231713	0.00795722		0.00436667	-0.0143871	-0.0063479	-0.00647455	0.00356883	0.0038743	-0.00666082
0.00478333	-0.0136569	-0.00654906	0.00934303	0.00315905	0.00739098		0.00478333	-0.0137836	-0.00548363	-0.00584126	0.003919	0.00547618	-0.00678375
0.0052	-0.0143796	-0.00493228	0.00916421	0.00347197	0.00695139		0.0052	-0.0129715	-0.00499934	-0.0051707	0.0050813	0.00553206	-0.00658259
0.00561667	-0.0157282	-0.00271201	0.00873953	0.00429153	0.0064224		0.00561667	-0.0118166	-0.00435859	-0.00412017	0.0063777	0.00534579	-0.00657141
0.00603333	-0.0171661	0.00037998	0.00781566	0.00549108	0.00650436		0.00603333	-0.0107214	-0.00368804	-0.00329316	0.0070557	0.00545755	-0.00734255
0.00645	-0.0177175	0.00374019	0.00621378	0.00608712	0.00792742		0.00645	-0.01017	-0.00287592	-0.00351667	0.00669062	0.00480562	-0.00777841
0.00686667	-0.0166446	0.00581145	0.00406802	0.00552833	0.0100657		0.00686667	-0.0102818	-0.00165403	-0.00495464	0.00583381	0.00341795	-0.00692904
0.00728333	-0.0145584	0.00576675	0.00274926	0.00481307	0.0114292		0.00728333	-0.0104383	2.98023e-05	-0.0070557	0.00502914	0.00284053	-0.00549853
0.0077	-0.0123754	0.00464171	0.00285357	0.00432134	0.0112429		0.0077	-0.0104308	0.00208616	-0.00911951	0.00435114	0.00395812	-0.00350922
0.00811667	-0.0101775	0.00402331	0.0038147	0.00396371	0.0105128		0.00811667	-0.0104755	0.0038296	-0.01093	0.00400841	0.00586733	-0.000949949
0.00853333	-0.00845641	0.00373274	0.00502914	0.00399351	0.00999123		0.00853333	-0.0107959	0.00493973	-0.0125766	0.00379235	0.00772066	0.00191107
0.00895	-0.00725687	0.00348687	0.006482	0.00435114	0.0089556		0.00895	-0.0111237	0.00543147	-0.0135377	0.00399351	0.00977889	0.00339747
0.00936667	-0.00657886	0.0037998	0.00861287	0.0050962	0.00695139		0.00936667	-0.0111237	0.00554323	-0.0134036	0.00441819	0.0118185	0.00223517
0.00978333	-0.00613928	0.00491738	0.0103936	0.00652671	0.00487268		0.00978333	-0.0109822	0.00599027	-0.0120401	0.00429153	0.012964	-0.000882894
0.0102	-0.00583381	0.00627339	0.0109971	0.00828505	0.00430644		0.0102	-0.0111014	0.00666082	-0.0100955	0.00336766	0.0127219	-0.00434741
0.0106167	-0.00584871	0.00703335	0.0112429	0.00929087	0.00429898		0.0106167	-0.0116974	0.00761449	-0.00865758	0.00209361	0.0111386	-0.00726432
0.0110333	-0.00602752	0.00736862	0.0121519	0.00913441	0.00303984		0.0110333	-0.0118986	0.00850111	-0.0083372	0.00108033	0.00876374	-0.00961125
0.01145	-0.00625104	0.00782311	0.0131875	0.00880659	0.00124425		0.01145	-0.0111982	0.00857562	-0.0089705	0.000149012	0.0066217	-0.0108294
0.0118667	-0.00672787	0.00803918	0.0129417	0.00928342	0.000923872		0.0118667	-0.00993162	0.00815093	-0.00946224	-0.000543892	0.00569038	-0.0104047
0.0122833	-0.00774115	0.00787526	0.0115931	0.0103563	0.00230968		0.0122833	-0.00870973	0.00758469	-0.00935793	-0.000588596	0.00593253	-0.0090301
0.0127	-0.00908226	0.00752509	0.0105277	0.0117868	0.00392646		0.0127	-0.00772625	0.0070557	-0.0090003	-0.000298023	0.00596046	-0.00824779
0.0131167	-0.00992417	0.00750273	0.0100657	0.0132024	0.00561774		0.0131167	-0.00653416	0.00616163	-0.00872463	-0.000275671	0.00525266	-0.00774488
0.0135333	-0.00999868	0.00751764	0.00973046	0.014253	0.008367		0.0135333	-0.00539422	0.00520796	-0.00827014	-0.000566244	0.0043679	-0.00656024
0.01395	-0.00993162	0.00706315	0.00972301	0.0148416	0.0117198		0.01395	-0.00474602	0.00531226	-0.00759959	-0.000625849	0.00320375	-0.00496209
0.0143667	-0.00984967	0.00640005	0.0106096	0.0148043	0.0139847		0.0143667	-0.00475347	0.00618398	-0.00760704	0.000111759	0.00173226	-0.00377744
0.0147833	-0.00949949	0.00558048	0.0128374	0.0138208	0.0143275		0.0147833	-0.00502169	0.00668317	-0.00870973	0.00136346	0.000437722	-0.00330806
0.0152	-0.00889599	0.00407547	0.015676	0.0118986	0.0130981		0.0152	-0.00489503	0.00624359	-0.0102371	0.00277907	0.000623986	-0.0035651
0.0156167	-0.00904501	0.00186265	0.0181422	0.010103	0.0108406		0.0156167	-0.00485778	0.0051558	-0.0111759	0.00399351	0.00249594	-0.00461563
0.0160333	-0.0102744	0.000119209	0.019446	0.00917167	0.00784546		0.0160333	-0.0057444	0.00427663	-0.0114739	0.00461191	0.00513159	-0.00628084
0.01645	-0.0117123	-0.000424683	0.0193864	0.00837445	0.00522286		0.01645	-0.00724196	0.00355393	-0.0116602	0.00488013	0.0076741	-0.00847131
0.0168667	-0.0128821	9.68575e-05	0.0186041	0.00694394	0.00409782		0.0168667	-0.00810623	0.00307709	-0.0120774	0.00421703	0.00916421	-0.0107624
0.0172833	-0.0138506	0.00119209	0.0169426	0.00527501	0.00487268		0.0172833	-0.00797212	0.00277162	-0.0123978	0.00255555	0.00931323	-0.0123382
0.0177	-0.0146925	0.0031665	0.0143945	0.00422448	0.00617653		0.0177	-0.00733882	0.00271946	-0.0126883	0.00064075	0.00859611	-0.0126176
0.0181167	-0.014849	0.00570715	0.0113249	0.00376254	0.00683218		0.0181167	-0.00581145	0.00366569	-0.0131279	-0.00076741	0.00749715	-0.0124834
0.0185333	-0.0146553	0.00740588	0.00862032	0.00342727	0.0070408		0.0185333	-0.00330061	0.00526756	-0.0134856	-0.00147521	0.00621192	-0.0129417
0.01895	-0.0147894	0.00751018	0.00704825	0.00328571	0.00694394		0.01895	-0.00168383	0.00632554	-0.0134334	-0.00236183	0.00511296	-0.0129081
0.0193667	-0.0149533	0.00623614	0.00630319	0.00375509	0.00651181		0.0193667	-0.00246614	0.00559539	-0.0123531	-0.00332296	0.00481494	-0.0116117
0.0197833	-0.0144243	0.00461191	0.00613183	0.00500679	0.00549853		0.0197833	-0.00458956	0.00370294	-0.0104383	-0.00342727	0.00544824	-0.00932068
0.0202	-0.0135005	0.00320375	0.00653416	0.00634044	0.00476092		0.0202	-0.00624359	0.00209361	-0.00812113	-0.00303239	0.00623986	-0.0073649
0.0206167	-0.0132248	0.00272691	0.00775605	0.00720471	0.00513345		0.0206167	-0.00727922	0.00108033	-0.00619888	-0.00268966	0.00678003	-0.00626966
0.0210333	-0.0127926	0.00359118	0.00926852	0.00745058	0.00619143		0.0210333	-0.00826269	0.000357628	-0.00526756	-0.00252575	0.00706874	-0.00515208
0.02145	-0.0113696	0.00547618	0.0103936	0.00726432	0.00717491		0.02145	-0.00882149	0.000864267	-0.00527501	-0.0019297	0.0071805	-0.00433624
0.0218667	-0.009574	0.00736117	0.0111163	0.00685453	0.00752509		0.0218667	-0.0083521	0.00344962	-0.00606477	-0.00051409	0.00655651	-0.00440329
0.0222833	-0.00872463	0.00873953	0.0118315	0.00625104	0.00724196		0.0222833	-0.00728667	0.00691414	-0.00761449	0.000931323	0.00527129	-0.00692904
0.0227	-0.00868738	0.00952184	0.0128001	0.00596046	0.00695139		0.0227	-0.00609457	0.00982732	-0.00974536	0.00222772	0.00377186	-0.0105165
0.0231167	-0.00818819	0.00936538	0.0133067	0.00612438	0.00700355		0.0231167	-0.00524521	0.0115409	-0.0118762	0.0032261	0.00247732	-0.0122264
0.0235333	-0.00762194	0.00815093	0.0135079	0.00631064	0.0076443		0.0235333	-0.00487268	0.0125542	-0.0133663	0.00399351	0.00184402	-0.0110194
0.02395	-0.00797212	0.00610203	0.0134707	0.00599772	0.00840425		0.02395	-0.0045374	0.0128374	-0.0137612	0.00467897	0.00173226	-0.00791252
0.0243667	-0.00956654	0.00400096	0.0130907	0.00531226	0.0089705		0.0243667	-0.00405312	0.0119507	-0.0131056	0.0051409	0.00232831	-0.00523031
0.0247833	-0.0118613	0.00276416	0.0122562	0.00471622	0.00936538		0.0247833	-0.00359118	0.010252	-0.0117496	0.0051111	0.00348315	-0.00271574
0.0252	-0.0141189	0.00275671	0.0107363	0.00393391	0.00929087		0.0252	-0.0038892	0.00783801	-0.0104383	0.00439584	0.00519678	-0.000257045
0.0256167	-0.0160113	0.00314415	0.00943243	0.00304729	0.00832975		0.0256167	-0.00484288	0.00519306	-0.00933558	0.00368059	0.00710599	0.001017
0.0260333	-0.0172034	0.00344962	0.00829995	0.00230968	0.00621378		0.0260333	-0.00525266	0.00285357	-0.00844896	0.00340492	0.00836328	-0.000391155
0.02645	-0.0175536	0.00397116	0.00749528	0.00202656	0.0038296		0.02645	-0.00417978	0.00100583	-0.00825524	0.00306964	0.0086613	-0.00473857
0.0268667	-0.0171289	0.00498444	0.00744313	0.00219792	0.001885		0.0268667	-0.00230968	-0.00013411	-0.00913441	0.00226498	0.00825152	-0.00980124
0.0272833	-0.0158846	0.0051856	0.00784546	0.00204891	0.000752509		0.0272833	-0.00107288	-3.72529e-05	-0.0107586	0.00179559	0.00760891	-0.0133887
0.0277	-0.0137463	0.00356138	0.00820309	0.00210851	0.000528991		0.0277	-0.00064075	0.00162423	-0.0120327	0.00257045	0.00665896	-0.0147745
0.0281167	-0.0115782	0.00133365	0.00790507	0.00263751	0.00109523		0.0281167	-8.9407e-05	0.00411272	-0.0127479	0.00419468	0.00518747	-0.0144169
0.0285333	-0.010334	-0.000238419	0.00802428	0.00359118	0.00181794		0.0285333	0.00037998	0.0063628	-0.0132173	0.00561029	0.00381842	-0.0131428
0.02895	-0.0101775	-0.000834465	0.0089258	0.00435114	0.0018701		0.02895	-0.000521541	0.00791997	-0.0129342	0.0064075	0.00349246	-0.01112
0.0293667	-0.0100136	-0.0012368	0.00981987	0.00403822	0.00143796		0.0293667	-0.00268966	0.00856817	-0.0117645	0.00682473	0.00488013	-0.00877306
0.0297833	-0.00962615	-0.00122189	0.0102296	0.00323355	0.000968575		0.0297833	-0.00466406	0.00777096	-0.0100508	0.00698864	0.00707805	-0.00630319
0.0302	-0.0102669	-0.000506639	0.010252	0.00205636	0.00101328		0.0302	-0.00573695	0.00548363	-0.00867993	0.00699609	0.00874512	-0.00417978
0.0306167	-0.0119731	0.000506639	0.0101328	0.000454485	0.0019148		0.0306167	-0.00713021	0.00216067	-0.00807643	0.00638515	0.00949018	-0.0029169
0.0310333	-0.0130758	0.0013262	0.00954419	-0.0013113	0.00396371		0.0310333	-0.00926852	-0.00147521	-0.00850111	0.0051707	0.00981614	-0.00273809
0.03145	-0.0126585	0.00159442	0.00867248	-0.00216067	0.00693649		0.03145	-0.0110716	-0.00463426	-0.010401	0.00409037	0.00968576	-0.00359863
0.0318667	-0.0118986	0.00167638	0.00800192	-0.00122189	0.00998378		0.0318667	-0.011459	-0.00628829	-0.0134334	0.00374764	0.0083074	-0.00439212
0.0322833	-0.0118762	0.00145286	0.00750273	0.00076741	0.0122637		0.0322833	-0.0106692	-0.00631064	-0.0166893	0.00364333	0.00585802	-0.00488386
0.0327	-0.0121444	0.00138581	0.00692159	0.00265241	0.0124872		0.0327	-0.00956654	-0.0057742	-0.0192821	0.00295788	0.00376254	-0.00482798
0.0331167	-0.011839	0.00144541	0.00637025	0.00394881	0.010334		0.0331167	-0.00784546	-0.00494719	-0.0208244	0.00235438	0.00336207	-0.00409037
0.0335333	-0.0111386	0.00143796	0.00591576	0.00494719	0.00661612		0.0335333	-0.00599027	-0.00370294	-0.0211447	0.00231713	0.00397675	-0.0028722
0.03395	-0.0102669	0.00133365	0.00544637	0.00531972	0.00291318		0.03395	-0.0051111	-0.00202656	-0.0204667	0.0019893	0.00459142	-0.00130758
0.0343667	-0.0089407	0.00136346	0.00488013	0.00466406	0.000156462		0.0343667	-0.00585616	-0.000759959	-0.0190586	0.000275671	0.00495464	-0.000424683
0.0347833	-0.00669062	0.00227988	0.00459701	0.00333786	-0.00177324		0.0347833	-0.00760704	0.000163913	-0.0171736	-0.00210106	0.00578351	-0.000670552
0.0352	-0.00426173	0.00346452	0.00485778	0.00203401	-0.00224262		0.0352	-0.00971556	0.00178814	-0.0151619	-0.0037998	0.00693835	-0.00202283
0.0356167	-0.00346452	0.00467151	0.00563264	0.00115484	-0.000849366		0.0356167	-0.0126511	0.00383705	-0.0134185	-0.00492483	0.00740401	-0.00386685
0.0360333	-0.00494719	0.00575185	0.00635535	0.000715256	0.00184029		0.0360333	-0.0157207	0.00545382	-0.0121444	-0.00583381	0.00661239	-0.00538677
0.03645	-0.00762939	0.00695139	0.00669062	0.00112504	0.0044629		0.03645	-0.0173673	0.00631064	-0.0110716	-0.0057742	0.00521541	-0.00626966
0.0368667	-0.0100955	0.00809133	0.00689179	0.00245869	0.00599027		0.0368667	-0.0173524	0.00654161	-0.0100061	-0.00386685	0.00438653	-0.00628084
0.0372833	-0.0117198	0.00841916	0.00756979	0.00389665	0.00661612		0.0372833	-0.0164062	0.00629574	-0.00944734	-0.000990927	0.00447035	-0.00549853
0.0377	-0.0120103	0.00815093	0.00888109	0.00490993	0.0063777		0.0377	-0.0154898	0.00594556	-0.010103	0.0013113	0.00519678	-0.0047721
0.0381167	-0.010632	0.00748038	0.00977516	0.00562519	0.00514835		0.0381167	-0.0147447	0.00647455	-0.0114515	0.00252575	0.00579283	-0.0047721
0.0385333	-0.00824779	0.00641495	0.00993162	0.00573695	0.00342727		0.0385333	-0.0142977	0.00786036	-0.0124648	0.00329316	0.00617467	-0.00459328
0.03895	-0.00609457	0.00463426	0.00961125	0.00452995	0.0019297		0.03895	-0.0142083	0.00841916	-0.0123456	0.00388175	0.00630505	-0.00425801
0.0393667	-0.00467151	0.00258535	0.00932813	0.00177324	0.00112504		0.0393667	-0.0137612	0.00806153	-0.0114366	0.00391155	0.00565313	-0.00478327
0.0397833	-0.0038892	0.00128895	0.00906736	-0.00150502	0.000998378		0.0397833	-0.0135526	0.00772625	-0.0102594	0.00347942	0.00356697	-0.00710785
0.0402	-0.00347197	0.000678003	0.00875443	-0.00435114	0.00152737		0.0402	-0.0139996	0.00775605	-0.00840425	0.00291318	0.000167638	-0.0102706
0.0406167	-0.0032112	0.000603497	0.00878423	-0.00644475	0.00272691		0.0406167	-0.0143647	0.00747293	-0.00604242	0.00268966	-0.00331551	-0.0123493
0.0410333	-0.00317395	0.00089407	0.00917911	-0.00683218	0.00406802		0.0410333	-0.0136271	0.00661612	-0.00385195	0.00242889	-0.0056345	-0.0131428
0.04145	-0.00375509	0.00151247	0.010103	-0.00485778	0.00531226		0.04145	-0.0119358	0.0063926	-0.00275671	0.0019595	-0.00632368	-0.012707
0.0418667	-0.00522286	0.0019148	0.01093	-0.000961125	0.0064522		0.0418667	-0.0108778	0.0070557	-0.00279397	0.00144541	-0.00601634	-0.0112876
0.0422833	-0.00716746	0.00204891	0.0111833	0.00330806	0.00789762		0.0422833	-0.0109449	0.00765175	-0.00315905	0.000752509	-0.00518747	-0.0096783
0.0427	-0.00941753	0.00263006	0.010781	0.00651181	0.00933558		0.0427	-0.0111014	0.00692159	-0.00345707	-0.000447035	-0.00418164	-0.00875071
0.0431167	-0.0117049	0.00347197	0.00997633	0.00838935	0.00985712		0.0431167	-0.0104234	0.0051558	-0.00339001	-0.00195205	-0.00318512	-0.008706
0.0435333	-0.013642	0.0044927	0.00890344	0.0089854	0.00932813		0.0435333	-0.00917167	0.00388175	-0.00298023	-0.00269711	-0.00221655	-0.00904128
0.04395	-0.0147	0.00581145	0.00706315	0.00847131	0.00795722		0.04395	-0.00835955	0.00401586	-0.00261515	-0.00263006	-0.00149012	-0.00960007
0.0443667	-0.014849	0.00772625	0.00513345	0.00733882	0.00644475		0.0443667	-0.00870973	0.00486523	-0.00264496	-0.00265241	-0.000726432	-0.0100918
0.0447833	-0.0149086	0.00905991	0.0038594	0.00620633	0.0044778		0.0447833	-0.00926107	0.00508875	-0.00292808	-0.00308454	-0.000176951	-0.00946596
0.0452	-0.0151172	0.00873208	0.00355393	0.00564754	0.00220537		0.0452	-0.00921637	0.00491738	-0.00353157	-0.00327825	0.000502914	-0.00765547
0.0456167	-0.0153482	0.00755489	0.00382215	0.00550598	0.000916421		0.0456167	-0.0089258	0.00474602	-0.00479072	-0.00304729	0.00198372	-0.0061579
0.0460333	-0.0152662	0.00656396	0.00457466	0.00508875	0.00137091		0.0460333	-0.00921637	0.00455976	-0.00696629	-0.00324845	0.00371598	-0.00562146
0.04645	-0.0147969	0.00565499	0.0058189	0.00441819	0.00342727		0.04645	-0.00990927	0.00400096	-0.00908226	-0.00426918	0.00501052	-0.00571087
0.0468667	-0.0144169	0.00423938	0.00689924	0.00409782	0.00614673		0.0468667	-0.00977516	0.00336021	-0.0105649	-0.00516325	0.00599772	-0.00630319
0.0472833	-0.0142008	0.0031665	0.00738353	0.00465661	0.00870973		0.0472833	-0.00876933	0.0038147	-0.0117794	-0.00476837	0.00683591	-0.00748783
0.0477	-0.0137091	0.00332296	0.0071153	0.00579655	0.0104681		0.0477	-0.00758469	0.00529736	-0.0125468	-0.00330806	0.00629574	-0.00871718
0.0481167	-0.0127628	0.00392646	0.00685453	0.00669807	0.0107735		0.0481167	-0.0070557	0.00663102	-0.0126958	-0.00203401	0.00343658	-0.00966713
0.0485333	-0.011757	0.0039041	0.00737608	0.0070259	0.00948459		0.0485333	-0.00753254	0.00669062	-0.0124201	-0.00171363	-0.000419095	-0.0109635
0.04895	-0.0116974	0.00339001	0.00879914	0.00700355	0.00728667		0.04895	-0.00927597	0.00566244	-0.012666	-0.0019595	-0.00328757	-0.0123829
0.0493667	-0.0128374	0.00341982	0.0104457	0.00675768	0.00499189		0.0493667	-0.0119507	0.00433624	-0.013411	-0.00182539	-0.00529923	-0.0130981
0.0497833	-0.0140518	0.00380725	0.0117123	0.00607967	0.00373274		0.0497833	-0.0142828	0.002563	-0.0136271	-0.0012368	-0.00699423	-0.0130199
0.0502	-0.0148341	0.0038147	0.012584	0.00473857	0.00406802		0.0502	-0.0153035	0.000178814	-0.0130981	-0.000417233	-0.00752509	-0.0132322
0.0506167	-0.0151843	0.00356138	0.0135005	0.00343472	0.00552833		0.0506167	-0.0147447	-0.00200421	-0.0122935	0.000432134	-0.00604428	-0.0135563
0.0510333	-0.015609	0.00308454	0.0140965	0.00302494	0.00742823		0.0510333	-0.0130013	-0.00339747	-0.0115559	0.00138581	-0.00352971	-0.0132211
0.05145	-0.0160262	0.00244379	0.0143722	0.00305474	0.00904501		0.05145	-0.0103414	-0.00407547	-0.0107884	0.00233948	-0.00157394	-0.0121035
0.0518667	-0.0156313	0.00109523	0.0147	0.00280887	0.0102296		0.0518667	-0.00730157	-0.00424683	-0.00934303	0.00263751	0.000111759	-0.0101924
0.0522833	-0.0151172	-0.000461936	0.0149533	0.00211597	0.0108182		0.0522833	-0.00505149	-0.00376999	-0.00720471	0.00175834	0.00222586	-0.00742078
0.0527	-0.0152737	-0.00150502	0.0146255	0.00210851	0.0104755		0.0527	-0.00452995	-0.00283867	-0.00525266	-0.000268221	0.0043679	-0.00410154
0.0531167	-0.0165701	-0.00195205	0.0130683	0.00338256	0.00926107		0.0531167	-0.00567734	-0.00180304	-0.00438839	-0.00239909	0.00516884	-0.00211224
0.0535333	-0.0179484	-0.00171363	0.0108555	0.0051856	0.00772625		0.0535333	-0.00716001	-0.000722706	-0.00425428	-0.00335276	0.00510365	-0.00216812
0.05395	-0.0182465	-0.00139326	0.00847131	0.00689179	0.00644475		0.05395	-0.00783056	0.000409782	-0.00372529	-0.00309944	0.00487082	-0.00368804
0.0543667	-0.0176355	-0.00119209	0.00614673	0.00797212	0.00527501		0.0543667	-0.00765175	0.00100583	-0.00301003	-0.00283867	0.00410713	-0.00563264
0.0547833	-0.0165328	-0.00122189	0.0038892	0.00847876	0.00397116		0.0547833	-0.00740588	0.00103563	-0.00288338	-0.00333041	0.00308268	-0.00799075
0.0552	-0.0154078	-0.00131875	0.00169128	0.00813603	0.00310689		0.0552	-0.00768155	0.00107288	-0.00350922	-0.00415742	0.00246801	-0.0109971
0.0556167	-0.0142008	-0.00116229	0.000149012	0.00688434	0.00344217		0.0556167	-0.00808388	0.00140816	-0.00423938	-0.00439584	0.00300817	-0.013601
0.0560333	-0.0134185	-0.000998378	-0.000171363	0.00523031	0.00440329		0.0560333	-0.00859797	0.00193715	-0.00479072	-0.00416488	0.0033807	-0.0148304
0.05645	-0.0135675	-0.000484288	0.00101328	0.00368804	0.00475347		0.05645	-0.00943989	0.00239164	-0.00546873	-0.00412017	0.00306405	-0.0144728
0.0568667	-0.0146925	0.000461936	0.00277162	0.00303239	0.00433624		0.0568667	-0.0104159	0.00333041	-0.00613928	-0.00451505	0.00323169	-0.013724
0.0572833	-0.0159517	0.0013411	0.00422448	0.00332296	0.00409782		0.0572833	-0.0108406	0.0050962	-0.00689924	-0.00450015	0.00390224	-0.0133887
0.0577	-0.0163391	0.00171363	0.00563264	0.00397861	0.00420213		0.0577	-0.0103638	0.00751764	-0.00734627	-0.00297278	0.00433996	-0.0125282
0.0581167	-0.0158772	0.00169128	0.00704825	0.00409782	0.0037998		0.0581167	-0.00955164	0.00984222	-0.00686944	-0.000424683	0.00389293	-0.0106953
0.0585333	-0.0150651	0.0019893	0.00777096	0.0031814	0.00300258		0.0585333	-0.00881404	0.0111386	-0.00569224	0.00152737	0.00377186	-0.00881776
0.05895	-0.0140816	0.00252575	0.0070855	0.00134855	0.00301003		0.05895	-0.00826269	0.0112131	-0.00493228	0.00243634	0.00442378	-0.00784546
0.0593667	-0.0126362	0.00299513	0.00541657	-0.00113249	0.00421703		0.0593667	-0.00785291	0.010252	-0.00610948	0.00349432	0.00430271	-0.0080131
0.0597833	-0.0111908	0.00374764	0.00417233	-0.00373274	0.00543147		0.0597833	-0.00765175	0.00862032	-0.00873953	0.00483543	0.00272878	-0.0086613
0.0602	-0.0106767	0.005126	0.00393391	-0.00592321	0.00613183		0.0602	-0.00771135	0.00607222	-0.0113174	0.00505894	0.000633299	-0.00994652
0.0606167	-0.0117496	0.00666082	0.00423193	-0.00741333	0.00659376		0.0606167	-0.00805408	0.00277907	-0.0130981	0.00369549	-0.000512227	-0.0114106
0.0610333	-0.0138208	0.00726432	0.00435114	-0.00789762	0.00661612		0.0610333	-0.0089258	-2.98023e-05	-0.0140592	0.00216067	-0.0011269	-0.0122711
0.06145	-0.016056	0.00666082	0.00437349	-0.00772625	0.00538677		0.06145	-0.0103414	-0.00145286	-0.0146776	0.00150502	-0.00191852	-0.0134334
0.0618667	-0.0174493	0.00546128	0.0051707	-0.0071153	0.0031665		0.0618667	-0.0123233	-0.00193715	-0.0144318	0.00107288	-0.00287779	-0.0150762
0.0622833	-0.0177771	0.00416488	0.0063777	-0.00607967	0.00186265		0.0622833	-0.0144839	-0.00201166	-0.0130013	0.000745058	-0.00358559	-0.0161938
0.0627	-0.0175089	0.00265986	0.00710785	-0.00461936	0.00184029		0.0627	-0.0161305	-0.00128895	-0.0111759	0.00111759	-0.00340864	-0.016205
0.0631167	-0.0167713	0.000886619	0.00741333	-0.0031963	0.00220537		0.0631167	-0.0168085	0.000268221	-0.00987947	0.00184029	-0.00188127	-0.0161156
0.0635333	-0.0156239	-0.000156462	0.00800937	-0.00243634	0.00241399		0.0635333	-0.0163466	0.00146031	-0.00943243	0.00167638	0.000484288	-0.0166409
0.06395	-0.0139475	0.000178814	0.00874698	-0.00199676	0.00248849		0.06395	-0.0151917	0.00160188	-0.00876188	0.000864267	0.00265427	-0.0160374
0.0643667	-0.0125244	0.00143051	0.00876933	-0.00177324	0.00219792		0.0643667	-0.0139326	0.00111759	-0.00739843	0.000715256	0.00423752	-0.0133552
0.0647833	-0.0120625	0.00239909	0.00827014	-0.00184029	0.000804663		0.0647833	-0.0127777	0.000104308	-0.00641495	0.000983477	0.00567175	-0.0112094
0.0652	-0.0122339	0.00277162	0.00808388	-0.00204146	-0.00116229		0.0652	-0.0121891	-0.0013411	-0.00666827	0.000610948	0.00650063	-0.0107512
0.0656167	-0.0123158	0.00280887	0.00783801	-0.00168383	-0.002563		0.0656167	-0.0123605	-0.00274926	-0.00815839	-0.000119209	0.0053551	-0.011377
0.0660333	-0.0118464	0.00237674	0.00714511	-0.000625849	-0.00276416		0.0660333	-0.0134557	-0.00338256	-0.00970811	0.000223517	0.00269152	-0.0124611
0.06645	-0.0108108	0.00154227	0.00618398	0.000216067	-0.00148267		0.06645	-0.0149235	-0.00331551	-0.0108629	0.0012368	-0.000149012	-0.0149645
0.0668667	-0.00947714	0.000648201	0.00532717	0.000119209	0.000685453		0.0668667	-0.0156835	-0.00292808	-0.0119284	0.00134855	-0.00147149	-0.0185519
0.0672833	-0.00788271	0.00012666	0.00478327	-0.000908971	0.00228733		0.0672833	-0.0158846	-0.00218302	-0.0123084	0.000551343	-0.00141561	-0.0212565
0.0677	-0.00627339	-8.9407e-05	0.00484288	-0.00255555	0.00268966		0.0677	-0.0161082	-0.0012666	-0.0112802	-6.70552e-05	-0.00117347	-0.0227205
0.0681167	-0.00473112	-0.000275671	0.00612438	-0.00464916	0.00246614		0.0681167	-0.0164658	-0.000521541	-0.00906736	-0.000149012	-0.000661239	-0.0228882
0.0685333	-0.00347942	-0.000812113	0.00803918	-0.00683218	0.00245869		0.0685333	-0.0163838	-0.000163913	-0.00715256	-0.000491738	0.000670552	-0.0219606
0.06895	-0.003241	-0.00171363	0.00943243	-0.00818074	0.00249594		0.06895	-0.0157803	-0.000469387	-0.00642985	-0.00105053	0.00244938	-0.0196025
0.0693667	-0.00399351	-0.00229478	0.0103861	-0.00803173	0.00233203		0.0693667	-0.0152886	-0.00127405	-0.00674278	-0.000953674	0.00236556	-0.0174344
0.0697833	-0.00543147	-0.00169873	0.0114217	-0.00742078	0.0025183		0.0697833	-0.0149384	-0.00232458	-0.00783801	-0.00038743	0	-0.0164285
0.0702	-0.00712275	-0.000551343	0.0116825	-0.007011	0.00335276		0.0702	-0.0141934	-0.00283867	-0.0096485	0.000283122	-0.00245869	-0.0162832
0.0706167	-0.00906736	0.000104308	0.00992417	-0.00668317	0.00480562		0.0706167	-0.0131503	-0.00221282	-0.0114515	0.000827014	-0.00393018	-0.0175461
0.0710333	-0.011228	0.00012666	0.00671297	-0.00628084	0.00578165		0.0710333	-0.0120103	-0.000871718	-0.0122711	0.00127405	-0.00491738	-0.0198483
0.07145	-0.0128597	9.68575e-05	0.00415742	-0.00608712	0.00503659		0.07145	-0.0104234	0.000402331	-0.0121072	0.0013113	-0.00566244	-0.0229441
0.0718667	-0.0137165	0.000432134	0.0025332	-0.00654906	0.00272691		0.0718667	-0.00844151	0.00116229	-0.0109822	0.000648201	-0.00471249	-0.0256374
0.0722833	-0.0139773	0.000335276	0.000938773	-0.00664592	0.00025332		0.0722833	-0.00678748	0.00186265	-0.00922382	0.000186265	-0.00179745	-0.0269786
0.0727	-0.014469	-0.000625849	-0.000417233	-0.00593811	-0.00149012		0.0727	-0.00622124	0.00261515	-0.00733882	7.45058e-06	0.00138767	-0.0269674
0.0731167	-0.0152737	-0.00200421	-7.45058e-06	-0.00503659	-0.00302494		0.0731167	-0.00671297	0.00303239	-0.0057295	-0.000283122	0.0035204	-0.0251457
0.0735333	-0.0155941	-0.00297278	0.00236183	-0.00434369	-0.00409782		0.0735333	-0.00801682	0.00296533	-0.00452995	-0.000648201	0.0042282	-0.0226535
0.07395	-0.0156462	-0.00333786	0.00481307	-0.00417233	-0.00393391		0.07395	-0.00977516	0.00304729	-0.00299513	-0.000603497	0.00393018	-0.0199825
0.0743667	-0.0160187	-0.00369549	0.00640005	-0.00416488	-0.00270456		0.0743667	-0.0110641	0.00298023	-0.00151992	8.19564e-05	0.00333413	-0.0172779
0.0747833	-0.0166297	-0.00371784	0.00740588	-0.00405312	-0.00146031		0.0747833	-0.0109822	0.00245124	-0.00106543	0.000678003	0.0028871	-0.0143163
0.0752	-0.0162944	-0.0025183	0.00844896	-0.00365078	-0.000678003		0.0752	-0.00999868	0.00170618	-0.00144541	0.000804663	0.00237487	-0.0114106
0.0756167	-0.0143275	0.000216067	0.00874698	-0.00295043	-0.000417233		0.0756167	-0.00879169	0.0013411	-0.00196695	0.000610948	0.0013411	-0.0096783
0.0760333	-0.0120774	0.00333041	0.00761449	-0.00208616	-0.000707805		0.0760333	-0.00753254	0.00166893	-0.0025928	0.000454485	-0.000111759	-0.00860542
0.07645	-0.0106618	0.00536442	0.00610203	-0.00124425	-0.00110269		0.07645	-0.00613183	0.0019744	-0.00389665	0.000156462	-0.000530854	-0.00814721
0.0768667	-0.0102222	0.00579655	0.00517815	-0.000745058	-0.000916421		0.0768667	-0.00440329	0.00218302	-0.00520051	-0.000625849	0.000353903	-0.00821427
0.0772833	-0.0106618	0.00470877	0.00467897	-0.000670552	7.45058e-06		0.0772833	-0.00288338	0.00216812	-0.00472367	-0.00204146	0.00182539	-0.00925362
0.0777	-0.0116229	0.00275671	0.00340492	-0.00103563	0.00133365		0.0777	-0.00141561	0.00169873	-0.00280142	-0.00350922	0.00336207	-0.0107847
0.0781167	-0.0129566	0.000111759	0.00118464	-0.00114739	0.00320375		0.0781167	-0.000163913	0.000678003	-0.00100583	-0.00407547	0.00454485	-0.0113659
0.0785333	-0.0134408	-0.00257045	-0.000759959	-0.00113249	0.00526011		0.0785333	0.000581145	-0.000700355	-0.000238419	-0.00398606	0.00562519	-0.01131
0.07895	-0.0126511	-0.00403822	-0.00213087	-0.00110269	0.00659376		0.07895	0.000730157	-0.00177324	-0.000245869	-0.003241	0.00625849	-0.01074
0.0793667	-0.0113621	-0.00412762	-0.00303239	-0.000551343	0.00683218		0.0793667	-0.000193715	-0.00203401	-0.000916421	-0.00157207	0.00621192	-0.00996888
0.0797833	-0.0104308	-0.00344962	-0.00311434	0.000305474	0.00619143		0.0797833	-0.00181049	-0.0018999	-0.00302494	0.00116974	0.00557862	-0.00917539
0.0802	-0.0102744	-0.00321865	-0.00184029	0.00137091	0.00458956		0.0802	-0.00349432	-0.00154972	-0.00615418	0.0038147	0.00490807	-0.00892952
0.0806167	-0.0104457	-0.00353157	0.000588596	0.00169128	0.00160932		0.0806167	-0.00425428	-0.000931323	-0.00954419	0.00439584	0.00479631	-0.0100806
0.0810333	-0.0115186	-0.00378489	0.0025928	0.00130385	-0.00170618		0.0810333	-0.00400841	-0.000409782	-0.0121072	0.00300258	0.00489876	-0.0120029
0.08145	-0.0133961	-0.00430644	0.00335276	0.00102073	-0.00359118		0.08145	-0.00378489	-0.000417233	-0.0135973	0.00089407	0.00442378	-0.0135675
0.0818667	-0.0149086	-0.00519306	0.00315905	0.000812113	-0.00376999		0.0818667	-0.00414997	-0.00141561	-0.0147298	-0.00119209	0.00368804	-0.0149757
0.0822833	-0.0151545	-0.006482	0.00214577	0.000879169	-0.00350177		0.0822833	-0.00482053	-0.00244379	-0.0154376	-0.00356883	0.0031013	-0.0165068
0.0827	-0.0142306	-0.0077039	0.000178814	0.000737607	-0.00353903		0.0827	-0.00565499	-0.00290573	-0.0156686	-0.00623614	0.00234693	-0.0177808
0.0831167	-0.0129789	-0.00821799	-0.00206381	0.000298023	-0.00372529		0.0831167	-0.00739098	-0.00344217	-0.0150427	-0.00819564	0.00129454	-0.0182502
0.0835333	-0.0116378	-0.00816584	-0.00301748	-0.000625849	-0.00391155		0.0835333	-0.00980496	-0.00430644	-0.0136569	-0.00917167	0.00060536	-0.0189319
0.08395	-0.0104085	-0.0077039	-0.00210851	-0.00234693	-0.00419468		0.08395	-0.0115931	-0.00513345	-0.0113696	-0.0100136	0.000847504	-0.0207424
0.0843667	-0.00964105	-0.00722706	-0.000633299	-0.00420213	-0.00431389		0.0843667	-0.0121593	-0.00528246	-0.00796467	-0.0108331	0.00142492	-0.0228211
0.0847833	-0.00917911	-0.00675023	0.000439584	-0.00593066	-0.00397116		0.0847833	-0.0121966	-0.00528991	-0.00448525	-0.0107288	0.00143424	-0.0240169
0.0852	-0.0089854	-0.00631809	0.0019297	-0.00721961	-0.00349432		0.0852	-0.0122041	-0.00564009	-0.00218302	-0.00936538	0.00100583	-0.0244416
0.0856167	-0.00926107	-0.00613928	0.00400096	-0.00813603	-0.00306219		0.0856167	-0.0116006	-0.00537187	-0.00146031	-0.00757724	0.000447035	-0.0245981
0.0860333	-0.00996143	-0.00599027	0.00537932	-0.00862032	-0.00236929		0.0860333	-0.0105649	-0.00423193	-0.00163913	-0.00607967	-0.000214204	-0.0234805
0.08645	-0.0102445	-0.00564754	0.00521541	-0.00811368	-0.00149012		0.08645	-0.00990182	-0.00291318	-0.00239909	-0.00495464	-0.000931323	-0.0213347
0.0868667	-0.0096485	-0.00516325	0.00429898	-0.0070259	-0.00146776		0.0868667	-0.00988692	-0.00215322	-0.00347942	-0.00462681	-0.00155531	-0.0198707
0.0872833	-0.00885874	-0.00466406	0.00368059	-0.00579655	-0.00271201		0.0872833	-0.0103936	-0.00202656	-0.00428408	-0.00528991	-0.00147149	-0.019893
0.0877	-0.00887364	-0.00365824	0.00284612	-0.00486523	-0.00448525		0.0877	-0.0112951	-0.00215322	-0.00423193	-0.00624359	-0.00057742	-0.0201166
0.0881167	-0.00997633	-0.00241399	0.00140816	-0.00400841	-0.00578165		0.0881167	-0.0124499	-0.00244379	-0.0038594	-0.00620633	0.00107102	-0.0191443
0.0885333	-0.0116006	-0.00169128	0.000156462	-0.00271946	-0.00668317		0.0885333	-0.0135973	-0.00233948	-0.0038743	-0.00485033	0.00282191	-0.0180826
0.08895	-0.0135526	-0.00163913	-0.000290573	-0.00131875	-0.00781566		0.08895	-0.0147298	-0.00187755	-0.00413507	-0.00277907	0.00398606	-0.0182167
0.0893667	-0.0158101	-0.00149012	-0.000223517	-0.000365078	-0.00863522		0.0893667	-0.0157729	-0.00168383	-0.00463426	-0.000879169	0.00420958	-0.0185519
0.0897833	-0.0179857	-0.000625849	-0.000223517	-0.000588596	-0.0083372		0.0897833	-0.0163838	-0.00170618	-0.00560284	0.000409782	0.00318512	-0.0180155
0.0902	-0.0192598	0.000163913	-0.000454485	-0.00178814	-0.00678003		0.0902	-0.0164211	-0.00198185	-0.00699609	0.0013262	0.000996515	-0.0179373
0.0906167	-0.0189617	0.000782311	-0.000715256	-0.00331551	-0.00488758		0.0906167	-0.0162795	-0.00263006	-0.0083968	0.00200421	-0.00163913	-0.0198819
0.0910333	-0.0178218	0.00145286	-0.00109523	-0.00474602	-0.00335276		0.0910333	-0.0160113	-0.0038147	-0.00981241	0.00218302	-0.00397675	-0.0228547
0.09145	-0.0166073	0.00172854	-0.00119954	-0.00560284	-0.00160188		0.09145	-0.0152886	-0.00479072	-0.0115037	0.00150502	-0.00581145	-0.0242852
0.0918667	-0.0154898	0.0012666	-0.000268221	-0.00564754	0.000737607		0.0918667	-0.0145212	-0.00452995	-0.0130013	0.000283122	-0.00695698	-0.0241958
0.0922833	-0.0143349	9.68575e-05	0.00160188	-0.00510365	0.00303984		0.0922833	-0.0143424	-0.00360608	-0.0138208	-0.00089407	-0.0071805	-0.0241734
0.0927	-0.012815	-0.000156462	0.0038594	-0.00468642	0.00437349		0.0927	-0.0144392	-0.00307709	-0.0139996	-0.00150502	-0.00655651	-0.0241622
0.0931167	-0.0117198	0.000923872	0.00546128	-0.00433624	0.00431389		0.0931167	-0.0139847	-0.00351667	-0.0133142	-0.00165403	-0.00561588	-0.0234805
0.0935333	-0.011377	0.00286102	0.00625104	-0.00356138	0.00330061		0.0935333	-0.012733	-0.00460446	-0.0115559	-0.00143051	-0.00443309	-0.0224859
0.09395	-0.0116453	0.00498444	0.00622124	-0.00296533	0.00158697		0.09395	-0.0112951	-0.00550598	-0.00917167	-0.00112504	-0.00342727	-0.0221729
0.0943667	-0.0120103	0.00642985	0.00543892	-0.00339747	-0.000551343		0.0943667	-0.0102893	-0.00599027	-0.00701845	-0.000789762	-0.0033807	-0.0218935
0.0947833	-0.0123531	0.00727177	0.00463426	-0.00426918	-0.00224262		0.0947833	-0.00965595	-0.00602752	-0.00563264	-0.000663102	-0.00449829	-0.0207536
0.0952	-0.0133887	0.00701845	0.00434369	-0.00451505	-0.00265241		0.0952	-0.00921637	-0.00552088	-0.00469387	-0.00122189	-0.00560656	-0.0193454
0.0956167	-0.0148118	0.00591576	0.00480562	-0.00424683	-0.0012815		0.0956167	-0.00869483	-0.00462681	-0.00370294	-0.00236183	-0.00633299	-0.0177473
0.0960333	-0.015825	0.00439584	0.0051856	-0.00415742	0.000707805		0.0960333	-0.00844151	-0.00361353	-0.00298023	-0.00374019	-0.00677072	-0.0154451
0.09645	-0.0162944	0.00304729	0.0050813	-0.00420958	0.0018999		0.09645	-0.00926852	-0.00317395	-0.00310689	-0.00458211	-0.00629574	-0.0128187
0.0968667	-0.017032	0.00221282	0.00455231	-0.00409037	0.00219047		0.0968667	-0.01093	-0.00334531	-0.00427663	-0.00478327	-0.00488013	-0.0118017
0.0972833	-0.018023	0.00164658	0.00353157	-0.00393391	0.00216067		0.0972833	-0.0121742	-0.00345707	-0.00554323	-0.004448	-0.00339001	-0.0127964
0.0977	-0.0185892	0.00146776	0.00231713	-0.00396371	0.00190735		0.0977	-0.0126436	-0.00346452	-0.00592321	-0.0038296	-0.00307336	-0.0139922
0.0981167	-0.0183806	0.00133365	0.00145286	-0.00425428	0.000357628		0.0981167	-0.0132099	-0.00376254	-0.00588596	-0.00330806	-0.00326894	-0.0149645
0.0985333	-0.0176653	0.000700355	0.00180304	-0.00473112	-0.00225753		0.0985333	-0.0146255	-0.00447035	-0.00579655	-0.00312924	-0.00369735	-0.0160038
0.09895	-0.0171065	-0.000499189	0.00348687	-0.00565499	-0.00485033		0.09895	-0.0156462	-0.00465661	-0.0057444	-0.00366569	-0.00475906	-0.0170432
0.0993667	-0.0165701	-0.00148267	0.00547618	-0.00694394	-0.00682473		0.0993667	-0.0156164	-0.00443309	-0.00583381	-0.0044629	-0.00564381	-0.0172667
0.0997833	-0.015974	-0.00167638	0.00654906	-0.00810623	-0.00809133		0.0997833	-0.0157356	-0.00467151	-0.00644475	-0.00476837	-0.00525266	-0.0164621
0.1002	-0.0154376	-0.00159442	0.00640005	-0.00848621	-0.00843406		0.1002	-0.0163019	-0.00546128	-0.00781566	-0.00435114	-0.00355765	-0.0154898
0.100617	-0.0150651	-0.00181049	0.00640005	-0.00819564	-0.00709295		0.100617	-0.0168681	-0.00619888	-0.00948459	-0.00369549	-0.00180677	-0.0144057
0.101033	-0.0150055	-0.00205636	0.00772625	-0.00809133	-0.00409037		0.101033	-0.0166148	-0.00650436	-0.0110045	-0.00342727	-0.000167638	-0.0133105
0.10145	-0.0145882	-0.00186265	0.00956654	-0.00815093	-0.000193715		0.10145	-0.0163689	-0.00747293	-0.0118539	-0.00334531	0.00182539	-0.0120476
0.101867	-0.0138134	-0.00128895	0.0107363	-0.00785291	0.00347197		0.101867	-0.0164434	-0.00889599	-0.0115857	-0.00336766	0.00353903	-0.0102594
0.102283	-0.0131205	-0.00116974	0.0112131	-0.00722706	0.00553578		0.102283	-0.0160187	-0.01017	-0.0104606	-0.00412017	0.00466593	-0.00862777
0.1027	-0.0124499	-0.00133365	0.0121519	-0.00750273	0.00559539		0.1027	-0.0148192	-0.0108629	-0.00920147	-0.00593066	0.00533648	-0.00810251
0.103117	-0.0118315	-0.00103563	0.0130534	-0.00914931	0.00438839		0.103117	-0.0134632	-0.0111684	-0.00817329	-0.00826269	0.00519678	-0.00910834
0.103533	-0.0112429	-0.000573695	0.0123754	-0.0111014	0.00310689		0.103533	-0.0125915	-0.0117719	-0.00734627	-0.0100434	0.00393949	-0.0109524
0.10395	-0.0111982	-0.000998378	0.0101924	-0.0120327	0.00210106		0.10395	-0.0120625	-0.012055	-0.0070855	-0.0106767	0.00147149	-0.0135675
0.104367	-0.0112727	-0.00274181	0.00800192	-0.0123978	0.00109523		0.104367	-0.0113323	-0.0119358	-0.00748038	-0.0105575	-0.000922009	-0.0170767
0.104783	-0.0111982	-0.00430644	0.0070706	-0.0134781	3.72529e-05		0.104783	-0.0105202	-0.0114962	-0.00822544	-0.0102818	-0.00275671	-0.019893
0.1052	-0.0114515	-0.00500679	0.0064373	-0.01508	-0.00115484		0.1052	-0.0101253	-0.0111237	-0.00928342	-0.00989437	-0.00407919	-0.0203066
0.105617	-0.0119954	-0.00543147	0.00540912	-0.0157356	-0.00242889		0.105617	-0.010021	-0.0105426	-0.0108629	-0.00871718	-0.00412576	-0.0184402
0.106033	-0.0128001	-0.00573695	0.00456721	-0.0148267	-0.00407547		0.106033	-0.0105277	-0.00931323	-0.0133142	-0.00675768	-0.0033062	-0.0164956
0.10645	-0.0132024	-0.00548363	0.00473857	-0.0136495	-0.00563264		0.10645	-0.0113994	-0.00827014	-0.0151545	-0.00513345	-0.00195578	-0.0156239
0.106867	-0.0134557	-0.0044629	0.00578165	-0.0128374	-0.00650436		0.106867	-0.0127107	-0.00779331	-0.0153556	-0.00406802	-0.0011269	-0.0150874
0.107283	-0.0135452	-0.00359118	0.00642985	-0.0119284	-0.00655651		0.107283	-0.0141561	-0.00768155	-0.0140965	-0.00287592	-0.000791624	-0.0148863
0.1077	-0.0129417	-0.00312179	0.00604987	-0.0105575	-0.0057742		0.1077	-0.0154749	-0.0077486	-0.0122935	-0.00128895	-0.000372529	-0.0152998
0.108117	-0.0116453	-0.00248104	0.00454485	-0.00970811	-0.00429898		0.108117	-0.0162795	-0.00899285	-0.0108331	-0.000342727	8.3819e-05	-0.0164732
0.108533	-0.00979006	-0.0013262	0.00229478	-0.0104234	-0.00226498		0.108533	-0.0156909	-0.0115559	-0.00911206	-0.000111759	0.000726432	-0.0177361
0.10895	-0.0083968	0.000193715	-0.000417233	-0.0122339	-0.000596046		0.10895	-0.0139251	-0.0138432	-0.00787526	0.000178814	0.000828877	-0.0181831
0.109367	-0.00806898	0.00140071	-0.00280887	-0.0137538	-0.000417233		0.109367	-0.0120327	-0.0143871	-0.00792742	0.000275671	0.000707805	-0.0182167
0.109783	-0.00850111	0.00207126	-0.00425428	-0.0143126	-0.0012517		0.109783	-0.0108704	-0.0134408	-0.00939518	-9.68575e-05	0.000186265	-0.0186414
0.1102	-0.00924617	0.00217557	-0.00473112	-0.014089	-0.00227243		0.1102	-0.0101775	-0.0119731	-0.0115782	-0.000715256	-0.000698492	-0.019569
0.110617	-0.010483	0.00184774	-0.00418723	-0.0130609	-0.00313669		0.110617	-0.0100955	-0.0096038	-0.0135452	-0.00104308	-0.00194646	-0.020206
0.111033	-0.0121742	0.0013411	-0.00268221	-0.0109524	-0.00383705		0.111033	-0.0111386	-0.00616163	-0.0156611	-0.00160188	-0.00335276	-0.0203066
0.11145	-0.0137538	0.000573695	-0.000245869	-0.00821054	-0.00447035		0.11145	-0.0132322	-0.00289828	-0.0180304	-0.00242889	-0.00397675	-0.0210106
0.111867	-0.0144243	2.23517e-05	0.00217557	-0.00671297	-0.00440329		0.111867	-0.0151545	-0.00143051	-0.0203475	-0.00273436	-0.00421889	-0.0230446
0.112283	-0.0142157	-0.000245869	0.00396371	-0.00675023	-0.00386685		0.112283	-0.0160411	-0.00162423	-0.0216886	-0.00280887	-0.00426546	-0.0253245
0.1127	-0.0135452	-0.000819564	0.00540167	-0.00724196	-0.0031516		0.1127	-0.0164285	-0.00252575	-0.021413	-0.00333786	-0.00421889	-0.0268891
0.113117	-0.0125095	-0.00175089	0.00709295	-0.00760704	-0.00227988		0.113117	-0.0165328	-0.00420213	-0.0196919	-0.00435114	-0.00402331	-0.027705
0.113533	-0.0120178	-0.00250339	0.00878423	-0.00844151	-0.00177324		0.113533	-0.0161678	-0.00675023	-0.0173673	-0.00528991	-0.00374392	-0.0277609
0.11395	-0.0126287	-0.00239909	0.00951439	-0.00979751	-0.00213832		0.11395	-0.015229	-0.00925362	-0.0149533	-0.00561029	-0.00357628	-0.0264645
0.114367	-0.0141338	-0.00173599	0.00929832	-0.00976026	-0.00350177		0.114367	-0.0144392	-0.0108406	-0.0123009	-0.00553578	-0.00352971	-0.0240505
0.114783	-0.0158325	-0.000983477	0.00889599	-0.00806898	-0.00531226		0.114783	-0.0144616	-0.0116006	-0.00964105	-0.0044629	-0.00374392	-0.02167
0.1152	-0.0172406	2.98023e-05	0.00871718	-0.00610948	-0.00719726		0.1152	-0.0152439	-0.0112504	-0.00756234	-0.00229478	-0.00461005	-0.0202842
0.115617	-0.0182763	0.00102818	0.00813603	-0.00499934	-0.00949204		0.115617	-0.016965	-0.0096336	-0.00698864	0.000357628	-0.00587664	-0.0205077
0.116033	-0.0184029	0.000923872	0.0070706	-0.00441819	-0.011839		0.116033	-0.0194907	-0.00744313	-0.00755489	0.00292063	-0.00699423	-0.0220612
0.11645	-0.0175685	-0.000156462	0.00649691	-0.0038594	-0.0129938		0.11645	-0.0219941	-0.00581145	-0.0083521	0.00442564	-0.00759028	-0.0242852
0.116867	-0.016056	-0.00142306	0.00647455	-0.00404567	-0.0124276		0.116867	-0.0233501	-0.00494719	-0.00916421	0.00499934	-0.0071805	-0.0254363
0.117283	-0.0141487	-0.00233203	0.00590831	-0.00498444	-0.0105798		0.117283	-0.0232682	-0.0045076	-0.0100955	0.00424683	-0.00619329	-0.0245422
0.1177	-0.0124052	-0.00303239	0.00451505	-0.0063628	-0.00862777		0.1177	-0.0223964	-0.00519306	-0.0109002	0.00254065	-0.00524335	-0.023067
0.118117	-0.0110194	-0.00377744	0.00310689	-0.00781566	-0.00724942		0.118117	-0.0210255	-0.00696629	-0.0106916	0.000499189	-0.00556931	-0.0221059
0.118533	-0.0100508	-0.00353903	0.0025481	-0.00943989	-0.00600517		0.118533	-0.0187978	-0.00868738	-0.00924617	-0.00151992	-0.00759959	-0.0212677
0.11895	-0.00906736	-0.00265241	0.00219792	-0.0111759	-0.00469387		0.11895	-0.0160411	-0.00947714	-0.00738353	-0.00323355	-0.0110175	-0.0193454
0.119367	-0.00851601	-0.00169873	0.00166893	-0.012517	-0.00366569		0.119367	-0.0140816	-0.00955164	-0.00631809	-0.00497699	-0.0147242	-0.0169538
0.119783	-0.00910461	-0.000946224	0.00181794	-0.0132546	-0.00317395		0.119783	-0.0137761	-0.00941753	-0.00617653	-0.00599027	-0.017155	-0.0160933
0.1202	-0.010401	-0.000581145	0.00269711	-0.0132173	-0.0025779		0.1202	-0.0147447	-0.0090301	-0.00675768	-0.00631064	-0.0176765	-0.0167526
0.120617	-0.0113547	-0.000491738	0.0038445	-0.0122562	-0.00157952		0.120617	-0.0160709	-0.00859797	-0.00760704	-0.00588596	-0.0158045	-0.0172667
0.121033	-0.0114292	-0.00104308	0.0044778	-0.0106245	-0.000953674		0.121033	-0.0178218	-0.00853836	-0.00874698	-0.00443309	-0.011716	-0.0169314
0.12145	-0.0111163	-0.00169873	0.00476837	-0.00920147	-0.000923872		0.12145	-0.0197515	-0.00887364	-0.0102744	-0.00207126	-0.00617467	-0.0166744
0.121867	-0.0109002	-0.00231713	0.00499934	-0.00851601	-0.00127405		0.121867	-0.0209063	-0.00938028	-0.0113323	0.000685453	-0.00125728	-0.0173785
0.122283	-0.0108629	-0.00292808	0.00513345	-0.00853836	-0.00215322		0.122283	-0.0209138	-0.0100359	-0.0121966	0.00231713	0.00115484	-0.018362
0.1227	-0.011228	-0.00298768	0.00524521	-0.00902265	-0.00391155		0.1227	-0.0200495	-0.0111833	-0.0129715	0.0025779	0.00113621	-0.0187978
0.123117	-0.0125915	-0.00199676	0.00516325	-0.0101477	-0.00549108		0.123117	-0.018768	-0.0121668	-0.0138357	0.00151247	-9.31323e-05	-0.0192113
0.123533	-0.0148565	-0.000417233	0.00442564	-0.0113621	-0.00594556		0.123533	-0.0175983	-0.0123382	-0.0139847	-0.000990927	-0.00147149	-0.0201613
0.12395	-0.0170469	0.000789762	0.00289828	-0.0119582	-0.00583381		0.12395	-0.0174493	-0.0119433	-0.0125915	-0.00419468	-0.0031013	-0.0209212
0.124367	-0.0176877	0.00177324	0.00143051	-0.0116974	-0.00585616		0.124367	-0.0186712	-0.0117272	-0.010401	-0.00689179	-0.00515021	-0.0209101
0.124783	-0.0167638	0.00255555	0.000573695	-0.0109226	-0.00565499		0.124783	-0.0204295	-0.0118464	-0.0082776	-0.00815839	-0.00720844	-0.0211447
0.1252	-0.015147	0.00270456	0.00025332	-0.0105649	-0.00447035		0.1252	-0.0217408	-0.0111163	-0.00724942	-0.00821054	-0.00876374	-0.0216365
0.125617	-0.0134259	0.00204146	-0.000230968	-0.0107139	-0.00276416		0.125617	-0.0225902	-0.00980496	-0.00678748	-0.00730902	-0.010021	-0.0215918
0.126033	-0.0117794	0.00125915	-0.00110269	-0.0113994	-0.00151247		0.126033	-0.0229254	-0.00918657	-0.00630319	-0.00564009	-0.0111479	-0.0207759
0.12645	-0.0106841	0.000737607	-0.00192225	-0.0120029	-0.0012964		0.12645	-0.0223964	-0.00946224	-0.00623614	-0.00376254	-0.011744	-0.0210442
0.126867	-0.0106096	-0.000596046	-0.0026077	-0.0125766	-0.00154972		0.126867	-0.0211895	-0.00973791	-0.00683963	-0.00258535	-0.011269	-0.0229329
0.127283	-0.0113919	-0.00274181	-0.00309199	-0.0132248	-0.00171363		0.127283	-0.0202209	-0.00975281	-0.00795722	-0.00239164	-0.00967644	-0.024341
0.1277	-0.0123084	-0.00495464	-0.00354648	-0.0132471	-0.0018999		0.1277	-0.0201911	-0.0104979	-0.00821054	-0.00254065	-0.00701286	-0.0246987
0.128117	-0.0131056	-0.007011	-0.0038892	-0.0126138	-0.00268221		0.128117	-0.0206158	-0.0122339	-0.00772625	-0.00324845	-0.00425614	-0.0243746
0.128533	-0.0141636	-0.00886619	-0.00403076	-0.0120699	-0.00394136		0.128533	-0.0212193	-0.0136644	-0.00739843	-0.00440329	-0.00280328	-0.0232123
0.12895	-0.015296	-0.0104159	-0.00408292	-0.0125989	-0.00488013		0.12895	-0.0221059	-0.0141039	-0.00765175	-0.00587851	-0.00292435	-0.0202171
0.129367	-0.0162646	-0.0108331	-0.00373274	-0.0134483	-0.00537187		0.129367	-0.0232831	-0.0140294	-0.00852346	-0.00697374	-0.00409782	-0.0160374
0.129783	-0.0163689	-0.0100434	-0.00301748	-0.013642	-0.00548363		0.129783	-0.024192	-0.0138506	-0.00909716	-0.007011	-0.00569969	-0.0124946
0.1302	-0.0158697	-0.00872463	-0.00232458	-0.0135452	-0.00542402		0.1302	-0.0242516	-0.0132397	-0.00972301	-0.00647455	-0.00800006	-0.0106283
0.130617	-0.0155196	-0.00733137	-0.00195205	-0.0141636	-0.00508875		0.130617	-0.0237226	-0.0118613	-0.0107735	-0.00524521	-0.0101235	-0.0104383
0.131033	-0.0152811	-0.0063479	-0.00163168	-0.0151694	-0.00451505		0.131033	-0.0228584	-0.01055	-0.012368	-0.00389665	-0.0109337	-0.0119805
0.13145	-0.0150204	-0.00572205	-0.00154972	-0.0153407	-0.00342727		0.13145	-0.022009	-0.0102296	-0.0138655	-0.00292808	-0.0104215	-0.0151545
0.131867	-0.0149608	-0.00528991	-0.00251085	-0.0150204	-0.00213087		0.131867	-0.0213087	-0.0107139	-0.0142306	-0.00227988	-0.00845641	-0.0186302
0.132283	-0.0157878	-0.00473857	-0.00485033	-0.0151992	-0.00161678		0.132283	-0.0208542	-0.0112951	-0.0140294	-0.00196695	-0.00573695	-0.0208654
0.1327	-0.0171587	-0.00373274	-0.00730902	-0.0153631	-0.0018999		0.1327	-0.0207722	-0.0117198	-0.0141785	-0.00169873	-0.00257045	-0.0217035
0.133117	-0.0180975	-0.00227243	-0.00874698	-0.0143275	-0.00242889		0.133117	-0.0218153	-0.0122413	-0.0150204	-0.0018552	0.000325963	-0.0219718
0.133533	-0.0181869	-0.00102818	-0.00939518	-0.0120848	-0.00265241		0.133533	-0.0241622	-0.0130162	-0.0158772	-0.00248104	0.00184402	-0.0219494
0.13395	-0.0175238	-0.000469387	-0.00943243	-0.010021	-0.00269711		0.13395	-0.0266731	-0.0133738	-0.015907	-0.00318885	0.00187196	-0.0215024
0.134367	-0.0164434	-0.000484288	-0.00878423	-0.00902265	-0.00242889		0.134367	-0.0280887	-0.0130311	-0.0153705	-0.00450015	0	-0.0207536
0.134783	-0.0155196	-0.00111014	-0.00746548	-0.00926107	-0.00122189		0.134783	-0.0279471	-0.0125095	-0.0143275	-0.00674278	-0.00319444	-0.0204965
0.1352	-0.0155568	-0.00233203	-0.00641495	-0.0107139	0.000722706		0.1352	-0.0267997	-0.0119805	-0.0126213	-0.00967085	-0.00729226	-0.0203289
0.135617	-0.016138	-0.00391155	-0.00588596	-0.0123084	0.00306964		0.135617	-0.0245273	-0.0110567	-0.010699	-0.012286	-0.0113156	-0.019569
0.136033	-0.0168383	-0.00477582	-0.00534952	-0.0134707	0.00503659		0.136033	-0.0214353	-0.00933558	-0.00954419	-0.0137016	-0.0132713	-0.0188649
0.13645	-0.0176728	-0.00435114	-0.00465661	-0.0143573	0.00598282		0.13645	-0.0188127	-0.00741333	-0.0100881	-0.0140816	-0.0132434	-0.0187308
0.136867	-0.0189915	-0.00343472	-0.0038743	-0.0151023	0.0057891		0.136867	-0.0177175	-0.00619143	-0.0120923	-0.013411	-0.0124518	-0.0194795
0.137283	-0.020653	-0.00286847	-0.00312924	-0.0148416	0.00455976		0.137283	-0.0180677	-0.00549853	-0.0147969	-0.0124499	-0.0117626	-0.0209883
0.1377	-0.0220537	-0.00272691	-0.00260025	-0.0129864	0.00315905		0.1377	-0.0188872	-0.00496209	-0.0175163	-0.0120476	-0.0109337	-0.0225529
0.138117	-0.0228733	-0.00260025	-0.00241399	-0.0107288	0.0013411		0.138117	-0.0197217	-0.00474602	-0.0194237	-0.0124797	-0.0106171	-0.0235476
0.138533	-0.022836	-0.00201911	-0.00279397	-0.00943989	-0.000476837		0.138533	-0.0200346	-0.00493228	-0.0200495	-0.0132173	-0.0122748	-0.0230893
0.13895	-0.0220463	-0.00139326	-0.00367314	-0.0090301	-0.00166148		0.13895	-0.0195876	-0.00564754	-0.019975	-0.0134707	-0.014985	-0.0216588
0.139367	-0.0204444	-0.000931323	-0.00500679	-0.00834465	-0.00221282		0.139367	-0.0185296	-0.00650436	-0.0198632	-0.0136644	-0.0164099	-0.0195242
0.139783	-0.018537	-0.000342727	-0.00606477	-0.00725687	-0.0018999		0.139783	-0.0180602	-0.00698864	-0.0195503	-0.0136197	-0.0158232	-0.0168867
0.1402	-0.0164062	-0.000320375	-0.00593066	-0.00668317	-0.00157952		0.1402	-0.0189543	-0.00715256	-0.0185296	-0.0129566	-0.0141282	-0.0149533
0.140617	-0.0146776	-0.000990927	-0.00529736	-0.00712275	-0.00120699		0.140617	-0.0204816	-0.00752509	-0.016883	-0.0117943	-0.0116322	-0.014428
0.141033	-0.0137985	-0.00283122	-0.0050962	-0.00776351	-0.000759959		0.141033	-0.0220388	-0.0083372	-0.0156686	-0.0107586	-0.00812113	-0.0153333
0.14145	-0.0135675	-0.00553578	-0.00570715	-0.0077337	-0.00102073		0.14145	-0.0231042	-0.00911206	-0.0148937	-0.0104159	-0.00438653	-0.0165179
0.141867	-0.0138432	-0.00852346	-0.00667572	-0.00738353	-0.00164658		0.141867	-0.0240654	-0.00971556	-0.0142232	-0.0102371	-0.00169501	-0.0176132
0.142283	-0.0142381	-0.0113249	-0.0076592	-0.0070259	-0.00252575		0.142283	-0.0245869	-0.0106916	-0.0137985	-0.00992417	0	-0.017859
0.1427	-0.0150427	-0.0128895	-0.00885129	-0.00631064	-0.00295788		0.1427	-0.024274	-0.0122413	-0.0137538	-0.00967085	0.00089407	-0.0167415
0.143117	-0.0166968	-0.0133663	-0.00996143	-0.00502169	-0.00306219		0.143117	-0.0236556	-0.0134707	-0.0140294	-0.0096932	0.00108965	-0.015121
0.143533	-0.0193045	-0.0131726	-0.0105202	-0.00402331	-0.00376254		0.143533	-0.0231937	-0.0143051	-0.0142232	-0.0104085	0.000232831	-0.0137128
0.14395	-0.0218228	-0.0124201	-0.01017	-0.00467897	-0.0044778		0.14395	-0.0232086	-0.0151694	-0.0141263	-0.0114813	-0.00187196	-0.012774
0.144367	-0.0230819	-0.0107512	-0.00893325	-0.0071153	-0.00495464		0.144367	-0.0230968	-0.015758	-0.0137165	-0.0124648	-0.00447966	-0.0119694
0.144783	-0.0231564	-0.00880659	-0.00776351	-0.0107512	-0.00523031		0.144783	-0.022836	-0.0153854	-0.0132248	-0.013344	-0.00684522	-0.0117905
0.1452	-0.0228137	-0.00739843	-0.00749528	-0.0147372	-0.00591576		0.1452	-0.0227019	-0.0139698	-0.0134557	-0.0143424	-0.00868924	-0.0122935
0.145617	-0.0215918	-0.00713766	-0.00783801	-0.0184625	-0.00722706		0.145617	-0.0228733	-0.0122935	-0.0147149	-0.0151843	-0.0103563	-0.0125729
0.146033	-0.018917	-0.00739843	-0.00818074	-0.0209808	-0.00821799		0.146033	-0.0234693	-0.0110269	-0.0160933	-0.0148043	-0.0113435	-0.0123605
0.14645	-0.0163391	-0.00777841	-0.00802428	-0.0212416	-0.00841171		0.14645	-0.0242293	-0.0104606	-0.0167862	-0.0132173	-0.0102445	-0.0121705
0.146867	-0.0154078	-0.00872463	-0.00758469	-0.0193119	-0.00780821		0.146867	-0.0254363	-0.0109449	-0.0170097	-0.0110567	-0.00758097	-0.0126846
0.147283	-0.0157282	-0.00971556	-0.00690669	-0.016354	-0.00692159		0.147283	-0.026539	-0.0123009	-0.016965	-0.00859797	-0.00521541	-0.0136793
0.1477	-0.0159889	-0.0103042	-0.00590086	-0.0138134	-0.00625104		0.1477	-0.027068	-0.0136048	-0.0163317	-0.0057146	-0.00322238	-0.0151545
0.148117	-0.0165179	-0.00994652	-0.00469387	-0.0121742	-0.00595301		0.148117	-0.0270829	-0.0145137	-0.0153184	-0.0031963	-0.000959262	-0.0172667
0.148533	-0.0180975	-0.00932813	-0.00351667	-0.0111982	-0.00605732		0.148533	-0.0272021	-0.0147372	-0.0145808	-0.00214577	0.00132248	-0.0196137
0.14895	-0.020206	-0.00846386	-0.00301748	-0.0108108	-0.00631809		0.14895	-0.0279024	-0.0143349	-0.0145882	-0.00233948	0.00206754	-0.02205
0.149367	-0.0220984	-0.00689924	-0.00359863	-0.0112727	-0.00659376		0.149367	-0.0281632	-0.0135228	-0.0152588	-0.00303984	0.00108965	-0.0240505
0.149783	-0.023447	-0.00502914	-0.00507384	-0.0120774	-0.00673533		0.149783	-0.027664	-0.0129864	-0.0168085	-0.00392646	-0.000512227	-0.025481
0.1502	-0.0242889	-0.00340492	-0.0063777	-0.0125393	-0.00672042		0.1502	-0.0268668	-0.0135079	-0.0187382	-0.00493973	-0.00240281	-0.0262186
0.150617	-0.0246093	-0.00232458	-0.00700355	-0.0124872	-0.00650436		0.150617	-0.0262186	-0.0142455	-0.0197217	-0.00566989	-0.00435859	-0.0263751
0.151033	-0.0242963	-0.00133365	-0.00703335	-0.0121966	-0.00596791		0.151033	-0.0253469	-0.0146925	-0.0196099	-0.00549108	-0.00629574	-0.0259504
0.15145	-0.0234321	-0.000745058	-0.00680983	-0.0119507	-0.00556558		0.15145	-0.0239015	-0.0148192	-0.0191405	-0.00461936	-0.00808388	-0.0240393
0.151867	-0.0220984	-0.00113249	-0.00677258	-0.0114217	-0.00543147		0.151867	-0.0225902	-0.0150278	-0.0188798	-0.00366569	-0.00987202	-0.0210442
0.152283	-0.0205711	-0.00251085	-0.00735372	-0.011161	-0.00565499		0.152283	-0.0219047	-0.0153109	-0.018172	-0.00306219	-0.0115484	-0.0181831
0.1527	-0.0189245	-0.00485033	-0.00882149	-0.0117868	-0.00576675		0.1527	-0.0217631	-0.0153854	-0.0174046	-0.00304729	-0.0127964	-0.0156797
0.153117	-0.0173524	-0.00779331	-0.0106245	-0.012815	-0.00569969		0.153117	-0.0216588	-0.0160113	-0.0178739	-0.00377744	-0.0134017	-0.0130869
0.153533	-0.0164211	-0.0107065	-0.0121966	-0.0136346	-0.00612438		0.153533	-0.0213608	-0.0171959	-0.0199303	-0.0051856	-0.0131968	-0.0108406
0.15395	-0.0164956	-0.0128075	-0.0130832	-0.0142753	-0.0071153		0.15395	-0.0210777	-0.01809	-0.0227988	-0.00699609	-0.0124704	-0.0105053
0.154367	-0.0172779	-0.0135824	-0.0130385	-0.0153929	-0.00848621		0.154367	-0.0210926	-0.0177324	-0.0248924	-0.00888109	-0.0116415	-0.0124834
0.154783	-0.0182763	-0.0131354	-0.0119805	-0.0164285	-0.00931323		0.154783	-0.02148	-0.0163019	-0.0258312	-0.0104308	-0.0107381	-0.0152998
0.1552	-0.0193194	-0.0115857	-0.0105053	-0.0162199	-0.00970811		0.1552	-0.0218377	-0.0149012	-0.0256747	-0.0115335	-0.00973232	-0.0179037
0.155617	-0.0200793	-0.00913441	-0.00938028	-0.0150576	-0.00996888		0.155617	-0.0217259	-0.0138655	-0.0246167	-0.0119656	-0.008801	-0.0201501
0.156033	-0.0206605	-0.00675023	-0.00877678	-0.0139922	-0.00967085		0.156033	-0.0210255	-0.0129268	-0.022918	-0.0125393	-0.00813045	-0.0228211
0.15645	-0.0207797	-0.00513345	-0.00858307	-0.0132993	-0.00862777		0.15645	-0.0197366	-0.0117496	-0.0212193	-0.0134781	-0.00741333	-0.0256598
0.156867	-0.0199452	-0.00409037	-0.00851601	-0.012137	-0.00741333		0.156867	-0.0179708	-0.0109226	-0.0207499	-0.0144169	-0.00678003	-0.0268109
0.157283	-0.0182018	-0.00313669	-0.00848621	-0.010781	-0.00717491		0.157283	-0.0154153	-0.0109151	-0.0215918	-0.0149906	-0.00702217	-0.0252463
0.1577	-0.0161156	-0.00263006	-0.00819564	-0.00984967	-0.00792742		0.1577	-0.012584	-0.0113174	-0.0228211	-0.0149161	-0.00835396	-0.0218265
0.158117	-0.014469	-0.00330806	-0.00757724	-0.009574	-0.0083968		0.158117	-0.0107959	-0.011459	-0.0235364	-0.0140667	-0.0100955	-0.0185184
0.158533	-0.0126809	-0.00455231	-0.00707805	-0.0100136	-0.00806153		0.158533	-0.0108331	-0.0113472	-0.0240803	-0.0121221	-0.0121817	-0.0156015
0.15895	-0.0108704	-0.00536442	-0.00730902	-0.0109598	-0.00761449		0.15895	-0.0123233	-0.0120103	-0.0243261	-0.00948459	-0.014687	-0.0130534
0.159367	-0.0102818	-0.00555068	-0.00829995	-0.012517	-0.00778586		0.159367	-0.0141859	-0.0133514	-0.023447	-0.0070855	-0.0165682	-0.0115447
0.159783	-0.0112578	-0.00568479	-0.00915676	-0.0141934	-0.00827014		0.159783	-0.0166446	-0.0143424	-0.0217333	-0.00522286	-0.0166148	-0.0121817
0.1602	-0.0130683	-0.00570715	-0.00947714	-0.0158623	-0.00832975		0.1602	-0.019893	-0.0144243	-0.0202656	-0.00354648	-0.0150595	-0.0149421
0.160617	-0.0144988	-0.00523031	-0.009574	-0.0175014	-0.00846386		0.160617	-0.0229105	-0.0139922	-0.0197738	-0.00247359	-0.0132807	-0.0183061
0.161033	-0.0155866	-0.00439584	-0.00980496	-0.0184402	-0.00878423		0.161033	-0.0245795	-0.0137165	-0.0195578	-0.0025779	-0.0114273	-0.0210665
0.16145	-0.0163019	-0.00391155	-0.00972301	-0.0182912	-0.00876933		0.16145	-0.0248924	-0.0129491	-0.0193194	-0.00391155	-0.0096485	-0.0220723
0.161867	-0.0163242	-0.00454485	-0.00908971	-0.0172034	-0.00792742		0.161867	-0.0251308	-0.0115037	-0.0197589	-0.00520796	-0.00854954	-0.0216477
0.162283	-0.0161305	-0.00624359	-0.00874698	-0.0157654	-0.00692159		0.162283	-0.02563	-0.0104606	-0.0212118	-0.00562519	-0.00856817	-0.0201948
0.1627	-0.0160486	-0.00795722	-0.00941753	-0.0140667	-0.00657886		0.1627	-0.0258088	-0.0107959	-0.0235364	-0.00617653	-0.00919215	-0.0185184
0.163117	-0.0160709	-0.00903755	-0.0107586	-0.0125989	-0.0063628		0.163117	-0.0251308	-0.0121891	-0.0258163	-0.00745803	-0.00942498	-0.0176691
0.163533	-0.0158325	-0.009574	-0.0117943	-0.0118017	-0.0063479		0.163533	-0.0243336	-0.0130683	-0.0269338	-0.00888109	-0.00961125	-0.0171214
0.16395	-0.0158697	-0.00975281	-0.0123158	-0.0117943	-0.0064522		0.16395	-0.023827	-0.0130907	-0.0270382	-0.00964105	-0.00986271	-0.0166185
0.164367	-0.0165999	-0.00971556	-0.0123456	-0.0118911	-0.00687689		0.164367	-0.0233054	-0.0127554	-0.0267997	-0.0102445	-0.010049	-0.0163503
0.164783	-0.0176877	-0.00911206	-0.0118762	-0.0112355	-0.00728667		0.164783	-0.0226945	-0.0123605	-0.0267178	-0.0112504	-0.00993721	-0.0175685
0.1652	-0.0189841	-0.0083074	-0.0108778	-0.010781	-0.00783056		0.1652	-0.0222623	-0.0116453	-0.0264272	-0.0116378	-0.00973232	-0.0204183
0.165617	-0.0206158	-0.00772625	-0.00958145	-0.011012	-0.00905245		0.165617	-0.0224784	-0.011012	-0.025928	-0.0109747	-0.0102818	-0.0225641
0.166033	-0.0225306	-0.00783801	-0.00806898	-0.0117496	-0.0107884		0.166033	-0.0227243	-0.0111535	-0.0259951	-0.00987202	-0.0117626	-0.0240393
0.16645	-0.0236928	-0.00896305	-0.00622869	-0.0122488	-0.0128672		0.16645	-0.0227094	-0.0119358	-0.0262931	-0.00905245	-0.0135042	-0.025861
0.166867	-0.0237748	-0.0105351	-0.00450015	-0.0126585	-0.0145435		0.166867	-0.0222623	-0.0128597	-0.0258163	-0.0083819	-0.0149477	-0.0275709
0.167283	-0.0231937	-0.0122562	-0.00374019	-0.0143349	-0.0153035		0.167283	-0.0211596	-0.0133365	-0.0238046	-0.00752509	-0.01573	-0.0275485
0.1677	-0.0224113	-0.0138879	-0.00386685	-0.0164807	-0.0147		0.1677	-0.019744	-0.0138134	-0.0211298	-0.00667572	-0.0158977	-0.0250451
0.168117	-0.0218451	-0.0153258	-0.00386685	-0.0174716	-0.0126436		0.168117	-0.0184476	-0.0143945	-0.0191629	-0.00584871	-0.0150222	-0.0220053
0.168533	-0.0214651	-0.0163317	-0.00309199	-0.0166148	-0.00992417		0.168533	-0.0177547	-0.014998	-0.0182167	-0.00538677	-0.0127684	-0.0196248
0.16895	-0.0218078	-0.0166669	-0.00210851	-0.0151694	-0.00769645		0.16895	-0.0183731	-0.0158027	-0.0180379	-0.00543892	-0.0105053	-0.0176802
0.169367	-0.022985	-0.0162646	-0.00154227	-0.0141859	-0.00633299		0.169367	-0.0203475	-0.0166893	-0.018619	-0.00579655	-0.00987202	-0.0167526
0.169783	-0.0243038	-0.0150502	-0.000968575	-0.0128821	-0.00531972		0.169783	-0.0226945	-0.0172034	-0.0199229	-0.00644475	-0.0115111	-0.0175908
0.1702	-0.0248775	-0.0136569	-0.000230968	-0.0114292	-0.00420213		0.1702	-0.0238046	-0.0166893	-0.0210479	-0.00779331	-0.0141468	-0.019569
0.170617	-0.0244379	-0.0131354	0.000216067	-0.0105798	-0.00413507		0.170617	-0.0236928	-0.0151396	-0.0213906	-0.0096634	-0.016503	-0.0214353
0.171033	-0.0240877	-0.0138953	-0.000581145	-0.0106618	-0.00544637		0.171033	-0.0237599	-0.0134483	-0.0213683	-0.0107214	-0.0183843	-0.0223741
0.17145	-0.0240803	-0.01546	-0.0025481	-0.0108853	-0.00628084		0.17145	-0.0242069	-0.0124946	-0.0213832	-0.0107214	-0.0189897	-0.0225306
0.171867	-0.0237674	-0.0169426	-0.00461191	-0.0106767	-0.00603497		0.171867	-0.0242293	-0.011906	-0.0208765	-0.0109747	-0.0174623	-0.0218935
0.172283	-0.0232384	-0.0184551	-0.00561029	-0.0101477	-0.00558048		0.172283	-0.0236183	-0.0115931	-0.0201166	-0.0124425	-0.0144541	-0.0199378
0.1727	-0.0231341	-0.0198185	-0.0051856	-0.00902265	-0.00569224		0.1727	-0.0227913	-0.0114739	-0.0198856	-0.0141338	-0.0116043	-0.0176355
0.173117	-0.0234246	-0.0197887	-0.00404567	-0.00783801	-0.00522286		0.173117	-0.0219494	-0.0115111	-0.0201538	-0.0148639	-0.00976026	-0.016015
0.173533	-0.0233129	-0.018239	-0.00271201	-0.00704825	-0.00347942		0.173533	-0.0206605	-0.011459	-0.0199825	-0.0152066	-0.00850297	-0.0152998
0.17395	-0.0227466	-0.0162572	-0.00143051	-0.00694394	-0.00216067		0.17395	-0.0188574	-0.0108331	-0.019297	-0.015527	-0.0083819	-0.0158139
0.174367	-0.0223964	-0.0154302	-0.000499189	-0.00733882	-0.00196695		0.174367	-0.0175908	-0.0104681	-0.0193194	-0.0149682	-0.00953674	-0.0178926
0.174783	-0.0224933	-0.0151023	-0.000655651	-0.00827014	-0.00276416		0.174783	-0.0178814	-0.0108927	-0.0202134	-0.0132173	-0.0107195	-0.0210553
0.1752	-0.0229552	-0.0136942	-0.00208616	-0.00947714	-0.00393391		0.1752	-0.0200346	-0.0120923	-0.0212342	-0.0113398	-0.0109989	-0.0235029
0.175617	-0.023365	-0.0117049	-0.00434369	-0.010401	-0.00495464		0.175617	-0.0231266	-0.0136569	-0.0219196	-0.0106469	-0.0113249	-0.0240728
0.176033	-0.0234544	-0.0100806	-0.00656396	-0.0109524	-0.00557303		0.176033	-0.0258535	-0.0150725	-0.0228658	-0.0106692	-0.012219	-0.0233464
0.17645	-0.0230148	-0.00935048	-0.00810623	-0.0111088	-0.00589341		0.17645	-0.0271648	-0.016138	-0.0244528	-0.010252	-0.0124518	-0.02186
0.176867	-0.0217408	-0.00917911	-0.00871718	-0.0109076	-0.00673533		0.176867	-0.0263378	-0.0165626	-0.0258684	-0.00932813	-0.0107381	-0.0191666
0.177283	-0.0194311	-0.009574	-0.00863522	-0.0106618	-0.00780821		0.177283	-0.0239462	-0.0160635	-0.0263974	-0.00804663	-0.00804663	-0.0156015
0.1777	-0.0164136	-0.0111461	-0.00867993	-0.0111014	-0.00865758		0.1777	-0.0215694	-0.0148788	-0.0263378	-0.00654161	-0.0060536	-0.0120923
0.178117	-0.013791	-0.0136048	-0.00882894	-0.0123903	-0.00984222		0.178117	-0.0199154	-0.0135079	-0.0260919	-0.00508875	-0.00433065	-0.0101812
0.178533	-0.0125021	-0.0157505	-0.00885129	-0.014253	-0.0117868		0.178533	-0.0185072	-0.0122488	-0.0255555	-0.00403822	-0.00248663	-0.0101253
0.17895	-0.0123307	-0.0163838	-0.00815093	-0.016436	-0.0135973		0.17895	-0.017643	-0.0111759	-0.0248104	-0.00403076	-0.000968575	-0.011187
0.179367	-0.013046	-0.0153631	-0.0071153	-0.0183657	-0.0139475		0.179367	-0.018239	-0.0101104	-0.0245422	-0.00504404	-0.00122935	-0.0127964
0.179783	-0.0145361	-0.0136495	-0.00606477	-0.0191927	-0.0133142		0.179783	-0.0196695	-0.00948459	-0.0250265	-0.00641495	-0.00353903	-0.0148304
0.1802	-0.0165552	-0.012137	-0.00452995	-0.0186116	-0.0130609		0.1802	-0.0204071	-0.00929832	-0.0259131	-0.00786781	-0.00632368	-0.0176802
0.180617	-0.0185743	-0.0106692	-0.00271201	-0.0172481	-0.013344		0.180617	-0.0207424	-0.00954419	-0.0269413	-0.00920147	-0.00827014	-0.0203624
0.181033	-0.0195578	-0.00943243	-0.00135601	-0.0158101	-0.013575		0.181033	-0.022091	-0.0106022	-0.0278428	-0.010334	-0.0089407	-0.0217147
0.18145	-0.0195801	-0.00882149	-0.00204146	-0.0143722	-0.013411		0.18145	-0.0243112	-0.0123903	-0.0280216	-0.0106543	-0.00862405	-0.0212453
0.181867	-0.0193343	-0.00863522	-0.00408292	-0.0126064	-0.0133216		0.181867	-0.0264496	-0.014022	-0.0268742	-0.00992417	-0.00762753	-0.0196807
0.182283	-0.0195056	-0.00880659	-0.00603497	-0.0107065	-0.0133067		0.182283	-0.0285134	-0.0141338	-0.0249073	-0.00905991	-0.0053551	-0.0186972
0.1827	-0.0200421	-0.0089556	-0.0070855	-0.00891089	-0.0128374		0.1827	-0.0308007	-0.0128523	-0.0227094	-0.00857562	-0.00244006	-0.0188425
0.183117	-0.020735	-0.00905245	-0.00755489	-0.00735372	-0.0118315		0.183117	-0.031963	-0.0108853	-0.0207722	-0.00824034	-0.000828877	-0.0194348
0.183533	-0.0218526	-0.0089407	-0.00801682	-0.00611693	-0.0108704		0.183533	-0.0310764	-0.00868738	-0.0195652	-0.00753254	-0.001546	-0.019379
0.18395	-0.0233576	-0.00826269	-0.0076741	-0.00551343	-0.0105798		0.18395	-0.0287518	-0.00631064	-0.0191107	-0.00698119	-0.00367872	-0.0187978
0.184367	-0.024572	-0.00753254	-0.00656396	-0.00656396	-0.0105575		0.184367	-0.0257716	-0.00468642	-0.0195876	-0.0071004	-0.00558793	-0.0186078
0.184783	-0.025101	-0.00669807	-0.00552833	-0.00873208	-0.0105351		0.184783	-0.022985	-0.00482053	-0.0204816	-0.00747293	-0.00743195	-0.017792
0.1852	-0.0252798	-0.00557303	-0.00566244	-0.0105053	-0.0108406		0.1852	-0.0210777	-0.0063777	-0.0215024	-0.00729412	-0.00993721	-0.0157356
0.185617	-0.0251234	-0.00435114	-0.00709295	-0.0109822	-0.0117943		0.185617	-0.0210628	-0.00834465	-0.0222847	-0.0063479	-0.0120513	-0.0130981
0.186033	-0.0243187	-0.00375509	-0.00929832	-0.0102147	-0.0128746		0.186033	-0.0221133	-0.0101551	-0.0225604	-0.00549108	-0.0125729	-0.0111982
0.18645	-0.0225231	-0.00457466	-0.0120401	-0.0090152	-0.013195		0.18645	-0.0225306	-0.0121891	-0.0229478	-0.00523031	-0.0122376	-0.0104159
0.186867	-0.0200942	-0.00602007	-0.0146106	-0.00742823	-0.0129491		0.186867	-0.0220314	-0.0141487	-0.023298	-0.00581145	-0.0122376	-0.0103824
0.187283	-0.0175387	-0.0070557	-0.0160187	-0.00599772	-0.0124276		0.187283	-0.0210479	-0.0153556	-0.0230893	-0.00725687	-0.0123773	-0.0110976
0.1877	-0.0152439	-0.00724196	-0.0159293	-0.0057742	-0.0116304		0.1877	-0.019975	-0.0154004	-0.0217333	-0.00903755	-0.0114646	-0.0119917
0.188117	-0.0139251	-0.00698864	-0.0149682	-0.00657886	-0.0104085		0.188117	-0.0182688	-0.0145137	-0.0197887	-0.0105649	-0.00986271	-0.0124946
0.188533	-0.0140667	-0.0064522	-0.0132993	-0.00792742	-0.00896305		0.188533	-0.0163615	-0.0128895	-0.0184625	-0.0113621	-0.00872649	-0.012897
0.18895	-0.0152364	-0.00537187	-0.0108629	-0.00950694	-0.00759214		0.18895	-0.0154972	-0.0107437	-0.0177994	-0.0119209	-0.00759959	-0.0135899
0.189367	-0.016652	-0.00395626	-0.00870973	-0.0111535	-0.00630319		0.189367	-0.0160038	-0.00894815	-0.0173599	-0.0124276	-0.00585802	-0.0139363
0.189783	-0.0181571	-0.00314415	-0.00791997	-0.0123829	-0.00525266		0.189783	-0.0172183	-0.00813603	-0.0174269	-0.0123233	-0.00381842	-0.0142604
0.1902	-0.0193939	-0.00421703	-0.0083521	-0.0126287	-0.00487268		0.1902	-0.0179708	-0.00837445	-0.0185817	-0.0117719	-0.00280328	-0.0154674
0.190617	-0.0199601	-0.00664592	-0.00861287	-0.012517	-0.00532717		0.190617	-0.0181943	-0.00910461	-0.020057	-0.0110492	-0.00390224	-0.0178926
0.191033	-0.0197962	-0.0089705	-0.00796467	-0.0124946	-0.0064224		0.191033	-0.0187308	-0.0101104	-0.0204369	-0.010699	-0.00614673	-0.0203289
0.19145	-0.0199676	-0.0105649	-0.00675023	-0.0123531	-0.0076741		0.19145	-0.0196695	-0.0113472	-0.0191554	-0.0103638	-0.00895001	-0.0219159
0.191867	-0.0211969	-0.0119954	-0.00552088	-0.011906	-0.00886619		0.191867	-0.0208169	-0.0124648	-0.0175908	-0.00985712	-0.0115577	-0.0231341
0.192283	-0.0225231	-0.0135154	-0.00437349	-0.0114664	-0.0102594		0.192283	-0.0213161	-0.0130832	-0.0171289	-0.00937283	-0.0135321	-0.0232123
0.1927	-0.0232756	-0.0141487	-0.00293553	-0.011079	-0.0114739		0.1927	-0.0212118	-0.013411	-0.0176281	-0.00914931	-0.0137463	-0.0218265
0.193117	-0.0235438	-0.0135601	-0.00130385	-0.0101253	-0.0116304		0.193117	-0.0211	-0.0141114	-0.0186265	-0.00952184	-0.0111014	-0.0197254
0.193533	-0.0230446	-0.0122562	-4.47035e-05	-0.00862032	-0.0101477		0.193533	-0.0207722	-0.0151098	-0.0192598	-0.00971556	-0.00729226	-0.0184849
0.19395	-0.0217631	-0.0112951	0.000745058	-0.00729412	-0.00805408		0.19395	-0.0199974	-0.0156984	-0.0195578	-0.00888109	-0.00331551	-0.0182167
0.194367	-0.0202432	-0.0108182	0.00172108	-0.00669062	-0.00648946		0.194367	-0.0186637	-0.015609	-0.0194237	-0.00737608	0.000195578	-0.0181943
0.194783	-0.019379	-0.0100061	0.00292808	-0.0064224	-0.0050962		0.194783	-0.0176206	-0.0157282	-0.0182837	-0.00624359	0.00315718	-0.0195242
0.1952	-0.0194088	-0.00823289	0.00308454	-0.0064224	-0.00355393		0.1952	-0.0175983	-0.0162199	-0.0165179	-0.00554323	0.00424683	-0.0216588
0.195617	-0.0195876	-0.00610203	0.00167638	-0.00709295	-0.00237674		0.195617	-0.0180975	-0.0162795	-0.01508	-0.00482053	0.00227243	-0.0232458
0.196033	-0.020355	-0.00465661	-0.000298023	-0.00819564	-0.0025481		0.196033	-0.0178441	-0.0154749	-0.015296	-0.00421703	-0.00101514	-0.0231564
0.19645	-0.0215843	-0.00360608	-0.00209361	-0.00876933	-0.00392646		0.19645	-0.0166371	-0.0145584	-0.0169128	-0.00450015	-0.00445172	-0.0226647
0.196867	-0.0222102	-0.00240654	-0.00400096	-0.00832975	-0.00552088		0.196867	-0.0153556	-0.0146404	-0.0187755	-0.0051558	-0.00746921	-0.0231452
0.197283	-0.0219643	-0.00143051	-0.0063777	-0.0077039	-0.00693649		0.197283	-0.0149608	-0.0153333	-0.0202805	-0.00545382	-0.0100862	-0.0231341
0.1977	-0.0212267	-0.00151992	-0.00792742	-0.00761449	-0.00815839		0.1977	-0.0152662	-0.0158623	-0.0214428	-0.00559539	-0.0116322	-0.0230782
0.198117	-0.0207126	-0.00213832	-0.0077039	-0.00803918	-0.00964105		0.198117	-0.0157952	-0.015676	-0.0219941	-0.00563264	-0.0115857	-0.024084
0.198533	-0.0201166	-0.00273436	-0.00641495	-0.00865012	-0.0112578		0.198533	-0.0171289	-0.01508	-0.0216067	-0.00564009	-0.0113621	-0.0264756
0.19895	-0.0192523	-0.00344217	-0.00536442	-0.0095591	-0.0123903		0.19895	-0.0193343	-0.0145361	-0.0209883	-0.00579655	-0.0114366	-0.0287667
0.199367	-0.0188723	-0.00452995	-0.00476092	-0.0109151	-0.0124425		0.199367	-0.0213683	-0.0138059	-0.0209883	-0.00664592	-0.0113249	-0.0294149
0.199783	-0.0191182	-0.00558048	-0.00374764	-0.0124276	-0.011526		0.199783	-0.0220761	-0.0123307	-0.021413	-0.00803173	-0.0103563	-0.0293814
0.2002	-0.0198185	-0.00631064	-0.00207871	-0.0138134	-0.00997633		0.2002	-0.0214353	-0.0101849	-0.0216588	-0.00920892	-0.00935048	-0.0286326
0.200617	-0.0203177	-0.00723451	-0.00025332	-0.0150055	-0.00790507		0.200617	-0.0201091	-0.00875443	-0.02186	-0.0100136	-0.00898726	-0.0267997
0.201033	-0.0203177	-0.00805408	0.000834465	-0.0158995	-0.00561029		0.201033	-0.0183582	-0.00862777	-0.0222847	-0.0107661	-0.00878237	-0.0239834
0.20145	-0.0201613	-0.00812858	0.00105798	-0.0160486	-0.00376254		0.20145	-0.0164285	-0.00916421	-0.0225306	-0.0111386	-0.0083819	-0.0211112
0.201867	-0.0201315	-0.00735372	0.00105053	-0.0153556	-0.00306219		0.201867	-0.0151396	-0.00937283	-0.022389	-0.0105053	-0.00841916	-0.0194795
0.202283	-0.0203401	-0.00616163	0.00077486	-0.0142008	-0.00359118		0.202283	-0.014931	-0.0096932	-0.0223368	-0.00879169	-0.0101328	-0.0191554
0.2027	-0.0202432	-0.00482798	-0.000350177	-0.0132024	-0.0050962		0.2027	-0.0152141	-0.0106245	-0.0227317	-0.0070855	-0.0127219	-0.0196584
0.203117	-0.0200123	-0.00350177	-0.00245869	-0.0126213	-0.0064671		0.203117	-0.0158697	-0.0111088	-0.0232309	-0.00647455	-0.0147428	-0.0204183
0.203533	-0.0201613	-0.00276416	-0.00417978	-0.0120997	-0.00718236		0.203533	-0.0172555	-0.0104234	-0.0234991	-0.00682473	-0.0155065	-0.0213794
0.20395	-0.0200719	-0.0031814	-0.00429153	-0.0113696	-0.0076443		0.20395	-0.0189096	-0.00882894	-0.0238568	-0.0070259	-0.0158139	-0.0225641
0.204367	-0.0191107	-0.00435114	-0.00347197	-0.0102967	-0.0082925		0.204367	-0.0200048	-0.00774115	-0.0247136	-0.00668317	-0.0164006	-0.0229329
0.204783	-0.0177994	-0.00561774	-0.00240654	-0.00917911	-0.00817329		0.204783	-0.0202134	-0.00757724	-0.0265166	-0.00631809	-0.0164937	-0.0215247
0.2052	-0.0176206	-0.00675768	-0.00138581	-0.007689	-0.00666827		0.2052	-0.0202656	-0.00809133	-0.0287741	-0.00633299	-0.0155251	-0.0190102
0.205617	-0.0183731	-0.0083819	-0.000730157	-0.00531226	-0.0051409		0.205617	-0.020057	-0.00918657	-0.0307411	-0.00654906	-0.0135507	-0.0168756
0.206033	-0.0185966	-0.0105351	-0.000819564	-0.00261515	-0.00465661		0.206033	-0.0190213	-0.0105575	-0.0321195	-0.00637025	-0.011418	-0.0163727
0.20645	-0.0182912	-0.0122935	-0.00173599	-0.00038743	-0.0044778		0.20645	-0.0181422	-0.0117943	-0.0328347	-0.00638515	-0.00994652	-0.0174344
0.206867	-0.0184923	-0.0135228	-0.00292808	0.000208616	-0.00354648		0.206867	-0.0180528	-0.0120476	-0.032492	-0.00709295	-0.00939704	-0.0191554
0.207283	-0.0194237	-0.0149757	-0.00406802	-0.000730157	-0.00296533		0.207283	-0.0186786	-0.0109449	-0.0307709	-0.00853836	-0.00899658	-0.0202507
0.2077	-0.0200868	-0.0169203	-0.00458211	-0.00247359	-0.00373274		0.2077	-0.0191182	-0.00888854	-0.0284761	-0.00975281	-0.0084471	-0.0202283
0.208117	-0.0201911	-0.0180006	-0.0038743	-0.00438094	-0.00482053		0.208117	-0.0194833	-0.00700355	-0.0264347	-0.00996888	-0.00872649	-0.019893
0.208533	-0.0200495	-0.01733	-0.0025332	-0.00562519	-0.00502169		0.208533	-0.0202209	-0.00626594	-0.0249743	-0.00978261	-0.0100117	-0.0197254
0.20895	-0.019908	-0.0157133	-0.00151992	-0.00650436	-0.0044778		0.20895	-0.0206903	-0.00652671	-0.0237226	-0.00936538	-0.0107288	-0.0196919
0.209367	-0.0192747	-0.0139922	-0.00130385	-0.00692904	-0.00435114		0.209367	-0.0205636	-0.0070706	-0.0224337	-0.00857562	-0.00895932	-0.0197813
0.209783	-0.0174865	-0.0122339	-0.00167638	-0.00698864	-0.00484288		0.209783	-0.0198111	-0.00721216	-0.0211224	-0.00731647	-0.00592321	-0.0207983
0.2102	-0.0147149	-0.0104606	-0.0025481	-0.00694394	-0.00538677		0.2102	-0.0189021	-0.00706315	-0.0199974	-0.00619888	-0.00381842	-0.0227541
0.210617	-0.0120699	-0.00926107	-0.00344217	-0.00716746	-0.00616908		0.210617	-0.0182316	-0.00677258	-0.0196993	-0.0057891	-0.00269152	-0.0248775
0.211033	-0.0108257	-0.0089407	-0.00374019	-0.00821799	-0.00721961		0.211033	-0.0178069	-0.00664592	-0.0201836	-0.0057742	-0.00204891	-0.0263862
0.21145	-0.0113174	-0.00914186	-0.00327825	-0.00924617	-0.00837445		0.21145	-0.017643	-0.00723451	-0.021182	-0.00587106	-0.00229105	-0.0270344
0.211867	-0.0130609	-0.00930578	-0.00235438	-0.0096038	-0.00859797		0.211867	-0.0178516	-0.00870228	-0.0227317	-0.00634044	-0.00433065	-0.027705
0.212283	-0.0155345	-0.00908971	-0.00139326	-0.00947714	-0.00758469		0.212283	-0.0184402	-0.0110716	-0.0249594	-0.00713766	-0.00768341	-0.0283532
0.2127	-0.0175536	-0.00883639	-0.000886619	-0.00986457	-0.00623614		0.2127	-0.0195876	-0.0132993	-0.0271052	-0.00823289	-0.0106264	-0.0287332
0.213117	-0.0181049	-0.00867993	-0.00148267	-0.0110641	-0.00537932		0.213117	-0.0211	-0.0143722	-0.0283718	-0.00934303	-0.0126567	-0.0281855
0.213533	-0.0179633	-0.00784546	-0.00273436	-0.0121072	-0.00531972		0.213533	-0.0227466	-0.0136942	-0.0286177	-0.0103489	-0.0134204	-0.026565
0.21395	-0.0180081	-0.00596046	-0.00400841	-0.0130609	-0.00562519		0.21395	-0.0241995	-0.0117049	-0.0281036	-0.0112653	-0.0129547	-0.0246987
0.214367	-0.0178814	-0.00420213	-0.00481307	-0.0139326	-0.00640005		0.214367	-0.0247136	-0.00996143	-0.0268146	-0.0117272	-0.0124052	-0.0230335
0.214783	-0.0167117	-0.00371784	-0.00497699	-0.0144914	-0.00745803		0.214783	-0.0242442	-0.00902265	-0.0248998	-0.0118613	-0.0123587	-0.0223182
0.2152	-0.0157952	-0.00395626	-0.00442564	-0.0144467	-0.0083521		0.2152	-0.0232011	-0.00888854	-0.023447	-0.0115409	-0.0125356	-0.0225864
0.215617	-0.0166073	-0.00445545	-0.00344217	-0.0140592	-0.0082776		0.215617	-0.0218898	-0.009574	-0.023067	-0.0112355	-0.0122283	-0.0238381
0.216033	-0.0179186	-0.00605732	-0.00290573	-0.0143275	-0.00763684		0.216033	-0.0206009	-0.0108704	-0.023447	-0.0112206	-0.0117533	-0.0255257
0.21645	-0.0178665	-0.0089854	-0.00280142	-0.0151321	-0.00689924		0.21645	-0.0195503	-0.0123084	-0.0241771	-0.0113994	-0.0120047	-0.0266321
0.216867	-0.0169054	-0.011608	-0.00289828	-0.0161082	-0.00622869		0.216867	-0.0193566	-0.0128299	-0.0253469	-0.0111535	-0.0124425	-0.0268668
0.217283	-0.0166297	-0.0124648	-0.00295788	-0.0165626	-0.00575185		0.217283	-0.0201315	-0.0120103	-0.0262856	-0.00967085	-0.0122562	-0.0270009
0.2177	-0.0165775	-0.0120476	-0.00281632	-0.0159293	-0.00524521		0.2177	-0.020802	-0.0102445	-0.0260547	-0.00747293	-0.0119116	-0.0276938
0.218117	-0.015974	-0.0109747	-0.0026226	-0.0145212	-0.00497699		0.218117	-0.0205785	-0.00818819	-0.0245571	-0.0051409	-0.0118371	-0.0279173
0.218533	-0.0155568	-0.00941008	-0.00216812	-0.012733	-0.00461936		0.218533	-0.0197887	-0.00699609	-0.0230893	-0.00328571	-0.0121072	-0.0266768
0.21895	-0.0164062	-0.00762939	-0.00137836	-0.01093	-0.00399351		0.21895	-0.0195354	-0.00654906	-0.0227988	-0.00220537	-0.0125915	-0.0243075
0.219367	-0.0179857	-0.00619888	-0.000588596	-0.00954419	-0.00277907		0.219367	-0.0201389	-0.00626594	-0.0236183	-0.00224262	-0.0135414	-0.0220947
0.219783	-0.0189841	-0.00590086	-0.000730157	-0.00890344	-0.00104308		0.219783	-0.0212863	-0.00615418	-0.0249818	-0.00341237	-0.0148453	-0.0208877
0.2202	-0.0193343	-0.00635535	-0.00217557	-0.00927597	0.000178814		0.2202	-0.0231788	-0.00660866	-0.0259429	-0.00461191	-0.0156928	-0.0209212
0.220617	-0.0196397	-0.00697374	-0.00345707	-0.010483	5.96046e-05		0.220617	-0.0255257	-0.00759959	-0.0259429	-0.00552088	-0.0161491	-0.0224411
0.221033	-0.0198185	-0.00712275	-0.00362098	-0.0119582	-0.000715256		0.221033	-0.0271127	-0.00824034	-0.0250265	-0.00599027	-0.0166055	-0.0256822
0.22145	-0.0195578	-0.00673533	-0.00309199	-0.0130609	-0.00142306		0.22145	-0.0267997	-0.0083372	-0.023894	-0.00586361	-0.0166893	-0.0300072
0.221867	-0.0190809	-0.00625849	-0.00267476	-0.0130162	-0.00208616		0.221867	-0.02487	-0.00803173	-0.0230148	-0.00566244	-0.015758	-0.0337623
0.222283	-0.0191256	-0.0058189	-0.00201911	-0.0121817	-0.00321865		0.222283	-0.022158	-0.00788271	-0.0228286	-0.00637025	-0.0140909	-0.0353046
0.2227	-0.019975	-0.00558048	-0.000923872	-0.0112057	-0.00472367		0.2227	-0.0192598	-0.00829995	-0.0239313	-0.00852346	-0.0121817	-0.0344887
0.223117	-0.020422	-0.00532717	-0.000551343	-0.00996143	-0.00565499		0.223117	-0.0169724	-0.0090301	-0.0264496	-0.0105575	-0.01017	-0.0326112
0.223533	-0.0195876	-0.00493228	-0.00223517	-0.00816584	-0.005804		0.223533	-0.015907	-0.00938028	-0.0293925	-0.0109375	-0.00821427	-0.0307672
0.22395	-0.0180602	-0.00408292	-0.00543147	-0.00583381	-0.00549108		0.22395	-0.0160262	-0.00887364	-0.0310391	-0.0102445	-0.00657514	-0.0293925
0.224367	-0.0168905	-0.00283867	-0.00777841	-0.00403822	-0.00565499		0.224367	-0.0165403	-0.00844151	-0.0312775	-0.00974536	-0.00551343	-0.0281855
0.224783	-0.0161231	-0.00155717	-0.0083223	-0.00336021	-0.00627339		0.224783	-0.0172034	-0.00841171	-0.0309721	-0.00995398	-0.00512227	-0.0269674
0.2252	-0.0152439	-0.000543892	-0.00783801	-0.00348687	-0.006482		0.2252	-0.0180304	-0.00820309	-0.0303313	-0.0103638	-0.00543892	-0.0263192
0.225617	-0.0149086	-6.70552e-05	-0.0076592	-0.00375509	-0.00588596		0.225617	-0.0183508	-0.00761449	-0.0291094	-0.0103787	-0.0060536	-0.0263192
0.226033	-0.0159442	-0.000283122	-0.00717491	-0.00389665	-0.00505894		0.226033	-0.0177771	-0.0070557	-0.0273436	-0.0103414	-0.00646338	-0.0262298
0.22645	-0.0178665	-0.0013411	-0.00553578	-0.0044778	-0.00507384		0.22645	-0.0167564	-0.00701845	-0.0261739	-0.0102893	-0.00681728	-0.0257827
0.226867	-0.0192598	-0.00312179	-0.00362098	-0.00552088	-0.00555813		0.226867	-0.0161305	-0.00673533	-0.0254139	-0.00978261	-0.00733882	-0.0258833
0.227283	-0.0197738	-0.00490993	-0.00248104	-0.00668317	-0.0057593		0.227283	-0.0160262	-0.00569224	-0.0241175	-0.00796467	-0.00810251	-0.0274032
0.2277	-0.019677	-0.00633299	-0.00221282	-0.00789762	-0.0051707		0.2277	-0.0163764	-0.00481307	-0.0224784	-0.00485033	-0.00909902	-0.0292808
0.228117	-0.0191033	-0.00745058	-0.00181794	-0.00936538	-0.00414997		0.228117	-0.0176728	-0.00499189	-0.0213906	-0.00170618	-0.0100676	-0.0298731
0.228533	-0.0181645	-0.0083372	-0.00115484	-0.0110343	-0.00337511		0.228533	-0.019744	-0.00609457	-0.0211746	0.000335276	-0.0104494	-0.0293143
0.22895	-0.017263	-0.00902265	-0.00111014	-0.0122637	-0.00265241		0.22895	-0.0213683	-0.00743568	-0.0207499	0.00116974	-0.00958331	-0.0286102
0.229367	-0.0169575	-0.00894815	-0.00216067	-0.0125542	-0.00183284		0.229367	-0.0215322	-0.00878423	-0.0199452	0.00120699	-0.00764616	-0.0283197
0.229783	-0.0171065	-0.00815839	-0.00376999	-0.0121742	-0.000931323		0.229783	-0.0201315	-0.0104457	-0.0195354	0.000238419	-0.00554137	-0.0272468
0.2302	-0.0181422	-0.00692159	-0.00482798	-0.0112355	-0.000506639		0.2302	-0.0178516	-0.0118166	-0.0198707	-0.00115484	-0.0041537	-0.0249557
0.230617	-0.0198781	-0.00593811	-0.00470877	-0.00985712	-0.000424683		0.230617	-0.0156239	-0.0121519	-0.020504	-0.00245869	-0.00362284	-0.0231676
0.231033	-0.0215098	-0.00586361	-0.0038296	-0.00819564	-0.00013411		0.231033	-0.0145361	-0.0117794	-0.0211596	-0.0032559	-0.00378117	-0.0227652
0.23145	-0.0224561	-0.00619888	-0.00263751	-0.00676513	0.000469387		0.23145	-0.0154227	-0.0117868	-0.0216588	-0.00373274	-0.00466593	-0.022687
0.231867	-0.0225157	-0.0064671	-0.00136346	-0.0064373	0.00102073		0.231867	-0.0177845	-0.0122339	-0.0220016	-0.00423938	-0.00642613	-0.0213683
0.232283	-0.0221506	-0.00613183	0.000119209	-0.00671297	0.00119954		0.232283	-0.0207797	-0.0119805	-0.0219792	-0.00435859	-0.00864267	-0.0197701
0.2327	-0.0208467	-0.00547618	0.00169873	-0.00683218	0.00147521		0.2327	-0.023365	-0.010483	-0.0218526	-0.00439584	-0.0102073	-0.0193566
0.233117	-0.0190809	-0.00436604	0.00305474	-0.00653416	0.00195205		0.233117	-0.0245795	-0.00853092	-0.0216067	-0.00474602	-0.0109803	-0.0200495
0.233533	-0.0182539	-0.00271946	0.00369549	-0.0064671	0.0019893		0.233533	-0.0242367	-0.00690669	-0.0210255	-0.00555068	-0.0111759	-0.0214018
0.23395	-0.0185445	-0.00146031	0.00353157	-0.00713021	0.00108033		0.23395	-0.0228211	-0.00528246	-0.0206828	-0.00615418	-0.011418	-0.0227094
0.234367	-0.0198483	-0.000990927	0.00291318	-0.00809878	-0.000484288		0.234367	-0.0216961	-0.003919	-0.0210255	-0.00551343	-0.0113714	-0.0234358
0.234783	-0.0212193	-0.00130385	0.00169128	-0.00891089	-0.00162423		0.234783	-0.0211373	-0.00338256	-0.0220165	-0.00389665	-0.0106357	-0.0225306
0.2352	-0.0223741	-0.0019148	-0.000238419	-0.00914186	-0.0025779		0.2352	-0.0208765	-0.00392646	-0.0229254	-0.00225007	-0.00966713	-0.019826
0.235617	-0.0228062	-0.00271201	-0.00277162	-0.00899285	-0.00407547		0.235617	-0.0211522	-0.00490993	-0.0236854	-0.000856817	-0.00853092	-0.015948
0.236033	-0.0218749	-0.00353157	-0.0051707	-0.00845641	-0.00550598		0.236033	-0.0220016	-0.00558048	-0.0243708	0.000342727	-0.00800006	-0.0114888
0.23645	-0.0203624	-0.00372529	-0.00689924	-0.00761449	-0.00619143		0.23645	-0.0228733	-0.00607967	-0.0246614	0.00116974	-0.00801869	-0.00832602
0.236867	-0.0186786	-0.003919	-0.00755489	-0.00623614	-0.00613183		0.236867	-0.0226945	-0.00681728	-0.0245273	0.00119209	-0.00899658	-0.00748783
0.237283	-0.0172928	-0.00458211	-0.00684708	-0.00462681	-0.00664592		0.237283	-0.0217929	-0.00774115	-0.0243708	0.00077486	-0.0109989	-0.00892952
0.2377	-0.0161529	-0.0050813	-0.00542402	-0.00369549	-0.00762939		0.2377	-0.0211746	-0.00858307	-0.0243187	0.000275671	-0.0134204	-0.011567
0.238117	-0.0156239	-0.00482053	-0.00379235	-0.00338256	-0.0077188		0.238117	-0.0211969	-0.00943243	-0.0239536	-0.000573695	-0.0158697	-0.014551
0.238533	-0.0158846	-0.00398606	-0.00209361	-0.00344962	-0.00684708		0.238533	-0.0219494	-0.0107065	-0.0229701	-0.00186265	-0.0175834	-0.0178367
0.23895	-0.016205	-0.00315905	-0.000178814	-0.00315905	-0.00555813		0.23895	-0.0235438	-0.0120476	-0.0215471	-0.00294298	-0.0186637	-0.0203848
0.239367	-0.0159219	-0.00210106	0.00143051	-0.00230223	-0.00472367		0.239367	-0.0257343	-0.0125989	-0.0200719	-0.00307709	-0.018971	-0.0219829
0.239783	-0.0149012	-0.000759959	0.0025332	-0.000953674	-0.00438839		0.239783	-0.0275671	-0.0125989	-0.0188053	-0.00265986	-0.0183098	-0.0230782
0.2402	-0.0142604	0.000357628	0.00380725	0.000722706	-0.00434369		0.2402	-0.0282675	-0.0127405	-0.0175685	-0.00255555	-0.0166148	-0.0236593
0.240617	-0.0145286	0.00103563	0.00513345	0.00210106	-0.00450015		0.240617	-0.0276193	-0.0131354	-0.0161454	-0.00265241	-0.0146218	-0.0234023
0.241033	-0.0155494	0.00113994	0.00613183	0.00298768	-0.00483543		0.241033	-0.0261292	-0.0131726	-0.0152886	-0.00207871	-0.0129454	-0.02262
0.24145	-0.016734	0.00089407	0.00665337	0.00296533	-0.00549108		0.24145	-0.0247881	-0.0124723	-0.0156388	-0.000961125	-0.0116043	-0.0222959
0.241867	-0.0180081	0.000365078	0.00748783	0.00157207	-0.00607222		0.241867	-0.0245348	-0.0111982	-0.0169203	-0.000618398	-0.0104494	-0.0224635
0.242283	-0.0196025	-0.000193715	0.00794977	-0.000707805	-0.00561774		0.242283	-0.0252947	-0.00974536	-0.0179932	-0.00162423	-0.00969507	-0.023067
0.2427	-0.0208914	-0.000730157	0.00673533	-0.00276416	-0.00377744		0.2427	-0.0259504	-0.00863522	-0.0186637	-0.00285357	-0.0101235	-0.0241958
0.243117	-0.0215247	-0.00140071	0.00407547	-0.00402331	-0.00149012		0.243117	-0.0260025	-0.00816584	-0.0194386	-0.00368804	-0.0115857	-0.0254028
0.243533	-0.0216663	-0.00169873	0.000931323	-0.00470877	6.70552e-05		0.243533	-0.0252798	-0.00802428	-0.019908	-0.00494719	-0.0135601	-0.0252016
0.24395	-0.0216514	-0.00149757	-0.001885	-0.00513345	0.000663102		0.24395	-0.0237226	-0.00816584	-0.0201985	-0.0070408	-0.0151526	-0.0237264
0.244367	-0.0213906	-0.000558794	-0.0045076	-0.00526011	0.000581145		0.244367	-0.0215247	-0.00884384	-0.0203028	-0.00929832	-0.0155345	-0.0225976
0.244783	-0.0210926	0.000633299	-0.00625849	-0.00531226	-0.000104308		0.244783	-0.0195205	-0.00964105	-0.0202134	-0.0107661	-0.0146125	-0.0220276
0.2452	-0.0206754	0.00124425	-0.00607967	-0.0057146	-0.001885		0.2452	-0.0191703	-0.00955164	-0.0197589	-0.0114888	-0.0126008	-0.0210553
0.245617	-0.0195429	0.00090152	-0.00400841	-0.00653416	-0.00430644		0.245617	-0.0208318	-0.00827014	-0.019066	-0.0115186	-0.0103284	-0.0192784
0.246033	-0.017263	-0.000141561	-0.000871718	-0.007689	-0.00585616		0.246033	-0.0235736	-0.00685453	-0.018768	-0.0106543	-0.00899658	-0.0176243
0.24645	-0.0142753	-0.00112504	0.00164658	-0.00863522	-0.00558793		0.24645	-0.0262707	-0.0064522	-0.0181496	-0.00948459	-0.00914559	-0.0161491
0.246867	-0.0115708	-0.00216812	0.00222772	-0.00906736	-0.00368804		0.246867	-0.0280142	-0.00716001	-0.016883	-0.00841171	-0.0105239	-0.0145845
0.247283	-0.00981241	-0.00365824	0.00115484	-0.00903755	-0.00113994		0.247283	-0.028789	-0.00873208	-0.0157952	-0.00741333	-0.0120141	-0.0136122
0.2477	-0.0096038	-0.00520051	-0.000625849	-0.00926852	0.00143051		0.2477	-0.0286251	-0.0108629	-0.0157282	-0.00641495	-0.0135414	-0.0146627
0.248117	-0.0108182	-0.00584126	-0.00216812	-0.0100657	0.00291318		0.248117	-0.0277311	-0.0130758	-0.0163242	-0.00563264	-0.0154227	-0.0180714
0.248533	-0.0127479	-0.00533462	-0.00357628	-0.0111759	0.00255555		0.248533	-0.0267848	-0.0150353	-0.0168458	-0.00561029	-0.0169408	-0.0224747
0.24895	-0.0149757	-0.0045374	-0.00467151	-0.0122264	0.000692904		0.24895	-0.0258461	-0.0164732	-0.0174716	-0.00572205	-0.0172481	-0.026051
0.249367	-0.0171512	-0.00412017	-0.00490248	-0.0130236	-0.0019893		0.249367	-0.0251308	-0.0167489	-0.0183284	-0.00566989	-0.0164565	-0.0281632
0.249783	-0.0184253	-0.00395626	-0.00458956	-0.0136644	-0.00487268		0.249783	-0.0245795	-0.0156909	-0.0189021	-0.0057891	-0.0156555	-0.0283085
0.2502	-0.0180826	-0.00371039	-0.00435859	-0.0135079	-0.00778586		0.2502	-0.0241995	-0.0137463	-0.0190288	-0.00627339	-0.0148918	-0.0269897
0.250617	-0.0167936	-0.00368804	-0.00481307	-0.0123456	-0.00990927		0.250617	-0.0239834	-0.0118017	-0.0195727	-0.00673533	-0.013588	-0.0253245
0.251033	-0.0157878	-0.00444055	-0.00563264	-0.0104457	-0.0107512		0.251033	-0.0237375	-0.00988692	-0.0213087	-0.00619888	-0.0116229	-0.0244528
0.25145	-0.0154823	-0.0057444	-0.00610203	-0.00874698	-0.0108033		0.25145	-0.0237003	-0.00762939	-0.023365	-0.00482798	-0.00967644	-0.0254698
0.251867	-0.0154749	-0.00709295	-0.00573695	-0.00771135	-0.0105277		0.251867	-0.0234246	-0.00622124	-0.0249073	-0.00336021	-0.00818632	-0.028152
0.252283	-0.0158623	-0.00797957	-0.0045225	-0.00693649	-0.01017		0.252283	-0.0223294	-0.00625104	-0.025712	-0.00208616	-0.00733882	-0.0325665
0.2527	-0.0171736	-0.0083819	-0.00303984	-0.00617653	-0.0096038		0.2527	-0.0205338	-0.00739098	-0.0261888	-0.000961125	-0.007255	-0.0370257
0.253117	-0.0190511	-0.00853836	-0.00163913	-0.0051707	-0.00888854		0.253117	-0.0187531	-0.00871718	-0.0261739	-0.000491738	-0.00746921	-0.0394955
0.253533	-0.0210106	-0.00820309	-0.000119209	-0.00360608	-0.00849366		0.253533	-0.0178665	-0.00988692	-0.0248253	-0.00140816	-0.00810251	-0.039909
0.25395	-0.0224933	-0.00715256	0.00168383	-0.00138581	-0.00819564		0.25395	-0.0177398	-0.0109896	-0.0230372	-0.00336766	-0.00955537	-0.0387244
0.254367	-0.023514	-0.00527501	0.0032708	0.00133365	-0.00769645		0.254367	-0.0185594	-0.0112951	-0.0217929	-0.00511855	-0.0119768	-0.0367574
0.254783	-0.0239164	-0.00297278	0.00428408	0.00401586	-0.00740588		0.254783	-0.0207126	-0.0108853	-0.0216663	-0.00608712	-0.0144076	-0.0347346
0.2552	-0.0234693	-0.00109523	0.00481307	0.00592321	-0.0071153		0.2552	-0.0238419	-0.0107437	-0.0221282	-0.00647455	-0.0153109	-0.0330247
0.255617	-0.0224486	0.000163913	0.00523031	0.00638515	-0.00660121		0.255617	-0.0266805	-0.0113621	-0.0227019	-0.00657141	-0.0150874	-0.0318848
0.256033	-0.020802	0.000998378	0.00551343	0.00485033	-0.00556558		0.256033	-0.0277013	-0.0123456	-0.0238642	-0.00634044	-0.0139698	-0.0305772
0.25645	-0.0188574	0.00179559	0.00513345	0.00233948	-0.00442564		0.25645	-0.0273362	-0.0127703	-0.0252873	-0.00567734	-0.0119023	-0.0289343
0.256867	-0.017114	0.00222027	0.00400096	-0.000119209	-0.00339001		0.256867	-0.0270754	-0.0126511	-0.0264719	-0.00478327	-0.00931323	-0.0268221
0.257283	-0.0157878	0.00216812	0.00289828	-0.00225007	-0.00157207		0.257283	-0.027515	-0.0125989	-0.0267252	-0.00388175	-0.00782311	-0.0241846
0.2577	-0.0145808	0.00242144	0.0025928	-0.00433624	0.000625849		0.2577	-0.0278205	-0.0123456	-0.0259727	-0.00324845	-0.00876374	-0.0222065
0.258117	-0.0135526	0.00321865	0.00309944	-0.00619888	0.00227243		0.258117	-0.0274256	-0.0114664	-0.0248849	-0.0031963	-0.0110175	-0.0215136
0.258533	-0.0129417	0.00388175	0.00355393	-0.00660866	0.00248849		0.258533	-0.0273734	-0.0104755	-0.0239089	-0.0039041	-0.0132713	-0.0218935
0.25895	-0.0129193	0.00361353	0.00350177	-0.00595301	0.00155717		0.25895	-0.0285134	-0.0108331	-0.022985	-0.00520796	-0.0149477	-0.0229441
0.259367	-0.0129566	0.00309944	0.00321865	-0.00536442	0.00012666		0.259367	-0.0300109	-0.0122264	-0.0216439	-0.00651181	-0.0161771	-0.0238605
0.259783	-0.0130534	0.00344217	0.00254065	-0.00522286	-0.00113249		0.259783	-0.0307709	-0.0128075	-0.0203028	-0.00738353	-0.0162236	-0.0240952
0.2602	-0.0136718	0.00420958	0.00117719	-0.00490993	-0.00169128		0.2602	-0.0312999	-0.0118315	-0.0197366	-0.0077486	-0.0145752	-0.023894
0.260617	-0.0142604	0.00471622	-0.00102073	-0.00417978	-0.00143051		0.260617	-0.0322163	-0.0104383	-0.0200272	-0.00752509	-0.0114553	-0.0239387
0.261033	-0.0142753	0.00444055	-0.00353157	-0.00427663	-0.000119209		0.261033	-0.0330582	-0.00909716	-0.0202134	-0.00669807	-0.00858679	-0.0246987
0.26145	-0.0134259	0.00379235	-0.00560284	-0.00540912	0.00149012		0.26145	-0.0326559	-0.00765175	-0.0200197	-0.00608712	-0.00771135	-0.0256039
0.261867	-0.0127852	0.00344217	-0.00675023	-0.00663847	0.00240654		0.261867	-0.0311136	-0.00678748	-0.0202954	-0.00655651	-0.00836328	-0.0268221
0.262283	-0.0132248	0.0032708	-0.00699609	-0.00766665	0.00195205		0.262283	-0.0292659	-0.00761449	-0.0211969	-0.00785291	-0.00904314	-0.0284538
0.2627	-0.0140592	0.00345707	-0.00627339	-0.00862032	0.000536442		0.2627	-0.0275224	-0.0101104	-0.0220314	-0.00881404	-0.00925735	-0.0294931
0.263117	-0.0145957	0.00371784	-0.00455976	-0.00935048	-0.00104308		0.263117	-0.0260398	-0.0128299	-0.02186	-0.0089854	-0.00989996	-0.029549
0.263533	-0.0146478	0.00397861	-0.00214577	-0.00931323	-0.00245869		0.263533	-0.0250191	-0.0150502	-0.0211298	-0.00865758	-0.0105985	-0.0288784
0.26395	-0.0143796	0.00374764	0.000238419	-0.00858307	-0.00341982		0.26395	-0.0249371	-0.0162199	-0.0203252	-0.00759214	-0.0101328	-0.028275
0.264367	-0.0133365	0.00272691	0.00180304	-0.00798702	-0.00417978		0.264367	-0.025101	-0.0162721	-0.0196174	-0.00552088	-0.00839122	-0.0282638
0.264783	-0.0112429	0.00134855	0.0025481	-0.00740588	-0.00504404		0.264783	-0.0247732	-0.0153556	-0.0190064	-0.00335276	-0.00629574	-0.0285096
0.2652	-0.00917911	-0.000238419	0.00230223	-0.00657141	-0.00519306		0.2652	-0.0240654	-0.0140071	-0.0187308	-0.00252575	-0.00413507	-0.0289567
0.265617	-0.00810623	-0.00174344	0.00142306	-0.00566244	-0.00409782		0.265617	-0.0240505	-0.012733	-0.019215	-0.00297278	-0.00178814	-0.029549
0.266033	-0.00815093	-0.00257045	0.000245869	-0.00462681	-0.00203401		0.266033	-0.0252277	-0.0118017	-0.0202432	-0.00355393	0.000335276	-0.0304207
0.26645	-0.00937283	-0.00204891	-0.00102818	-0.00379235	0.000290573		0.26645	-0.026837	-0.0119135	-0.0212863	-0.00409782	0.0016205	-0.0314154
0.266867	-0.0119731	-0.00090152	-0.00177324	-0.00300258	0.00241399		0.266867	-0.0286251	-0.0132173	-0.0221133	-0.0050813	0.00214204	-0.0320524
0.267283	-0.0149831	-0.000536442	-0.00186265	-0.00221282	0.00374019		0.267283	-0.0301227	-0.0150725	-0.022985	-0.00611693	0.00220724	-0.0323541
0.2677	-0.017032	-0.0012815	-0.00131875	-0.00121444	0.00288338		0.2677	-0.0310913	-0.0168532	-0.024125	-0.00654906	0.00161119	-0.0324212
0.268117	-0.01809	-0.00227988	-0.000908971	-0.000208616	1.49012e-05		0.268117	-0.0310913	-0.0183284	-0.0251904	-0.0064522	0.000772998	-0.0320636
0.268533	-0.0189841	-0.00265241	-0.000752509	5.21541e-05	-0.00355393		0.268533	-0.030309	-0.0197291	-0.0256374	-0.00676513	0.000335276	-0.0314601
0.26895	-0.0198334	-0.00237674	-0.000365078	-0.000543892	-0.00658631		0.26895	-0.0292957	-0.0204518	-0.0259131	-0.00761449	0.000772998	-0.0309683
0.269367	-0.0198483	-0.00183284	-0.000238419	-0.00150502	-0.00815093		0.269367	-0.0283495	-0.0192672	-0.0264645	-0.00810623	0.00133179	-0.030756
0.269783	-0.0195205	-0.0012368	-0.000365078	-0.00223517	-0.00801682		0.269783	-0.0280663	-0.0165254	-0.0270531	-0.00765175	0.00114553	-0.0304431
0.2702	-0.0198558	-0.000335276	-0.000178814	-0.00270456	-0.00663847		0.2702	-0.028424	-0.0136495	-0.0268593	-0.00620633	0.000568107	-0.0293925
0.270617	-0.0205934	0.000879169	0.00113994	-0.00265986	-0.00554323		0.270617	-0.0288784	-0.0118613	-0.0258163	-0.00438839	-0.000409782	-0.0284202
0.271033	-0.0210702	0.00233948	0.00321865	-0.00238419	-0.00540167		0.271033	-0.0284314	-0.010252	-0.0250041	-0.00273436	-0.0018999	-0.0280626
0.27145	-0.0212118	0.00350922	0.00526756	-0.00203401	-0.00572205		0.27145	-0.0270084	-0.00800937	-0.0247434	-0.00151247	-0.00362284	-0.0277497
0.271867	-0.0214949	0.00414252	0.00747293	-0.00207871	-0.00613183		0.271867	-0.0250563	-0.00651926	-0.024505	-0.00108778	-0.0048615	-0.0262409
0.272283	-0.0215247	0.00448525	0.00941008	-0.00311434	-0.00680238		0.272283	-0.0230521	-0.0063628	-0.0236779	-0.00153482	-0.00566244	-0.024341
0.2727	-0.0206307	0.0045076	0.00990182	-0.00567734	-0.00774115		0.2727	-0.0213161	-0.00683218	-0.0228509	-0.00268221	-0.0069011	-0.0236593
0.273117	-0.0194237	0.00456721	0.00824779	-0.00978261	-0.00823289		0.273117	-0.0202954	-0.00707805	-0.0225157	-0.00435859	-0.00845641	-0.0236705
0.273533	-0.0192672	0.00434369	0.00523031	-0.0136048	-0.00821799		0.273533	-0.0207052	-0.00811368	-0.0221431	-0.00623614	-0.0097882	-0.0233687
0.27395	-0.0203103	0.00397116	0.00219792	-0.0153929	-0.00874698		0.27395	-0.0220686	-0.0107214	-0.0214651	-0.00782311	-0.0104774	-0.0229776
0.274367	-0.0214651	0.00329316	-0.000327826	-0.0149235	-0.010021		0.274367	-0.0236258	-0.0132993	-0.0204816	-0.00863522	-0.0103191	-0.0231899
0.274783	-0.0220612	0.00282377	-0.00202656	-0.0131801	-0.0107363		0.274783	-0.0249073	-0.0146851	-0.0197887	-0.00904501	-0.00941567	-0.0232346
0.2752	-0.0220835	0.00298023	-0.0025332	-0.0107139	-0.00983477		0.2752	-0.0259206	-0.0150353	-0.0194013	-0.00953674	-0.00760891	-0.0225082
0.275617	-0.0213608	0.00299513	-0.00225007	-0.00791252	-0.00751018		0.275617	-0.026539	-0.0150651	-0.0190288	-0.00973791	-0.00557862	-0.0222959
0.276033	-0.019148	0.00238419	-0.00178814	-0.00568479	-0.00499189		0.276033	-0.0261888	-0.0145957	-0.0187606	-0.00886619	-0.00381842	-0.0229329
0.27645	-0.0158325	0.00113994	-0.00181794	-0.00523031	-0.0025332		0.27645	-0.0253171	-0.0131875	-0.0182986	-0.007011	-0.00279397	-0.0235476
0.276867	-0.0128001	0.000536442	-0.00242144	-0.00624359	-0.000365078		0.276867	-0.0247285	-0.0119507	-0.0177622	-0.00561774	-0.00281259	-0.0236705
0.277283	-0.0114217	0.00038743	-0.00341982	-0.0076741	0.000678003		0.277283	-0.024721	-0.0118837	-0.017114	-0.00520051	-0.00325032	-0.0232011
0.2777	-0.0120774	0.00026077	-0.00469387	-0.00903755	0.000551343		0.2777	-0.0250638	-0.0131428	-0.0166297	-0.00552088	-0.00393018	-0.0223629
0.278117	-0.0142455	0.000178814	-0.00566244	-0.00952929	-0.000402331		0.278117	-0.0253394	-0.0147074	-0.0169724	-0.00587851	-0.00461936	-0.0201836
0.278533	-0.0169128	0.00025332	-0.0063479	-0.00873208	-0.00133365		0.278533	-0.0254959	-0.0156015	-0.0183061	-0.00609457	-0.00562519	-0.0171214
0.27895	-0.0187606	0.000633299	-0.00657141	-0.0063777	-0.0025481		0.27895	-0.0253767	-0.0159666	-0.0200868	-0.006482	-0.0073947	-0.0141822
0.279367	-0.0190884	0.000469387	-0.00663847	-0.00366569	-0.00428408		0.279367	-0.024952	-0.0160784	-0.0213683	-0.00653416	-0.00944361	-0.0125282
0.279783	-0.0184476	-0.000357628	-0.00680238	-0.00169873	-0.00584126		0.279783	-0.024572	-0.0162348	-0.0221729	-0.0063777	-0.0111014	-0.0139587
0.2802	-0.0181347	-0.00186265	-0.007011	-0.000692904	-0.00675023		0.2802	-0.024505	-0.0156388	-0.0231713	-0.00633299	-0.0121538	-0.0173673
0.280617	-0.0181943	-0.00355393	-0.00712275	-0.000864267	-0.0070408		0.280617	-0.024423	-0.0141785	-0.0243634	-0.00699609	-0.0127126	-0.0209548
0.281033	-0.0179783	-0.00461936	-0.00669062	-0.00182539	-0.00723451		0.281033	-0.0236854	-0.0122488	-0.0248328	-0.00847131	-0.012517	-0.0230893
0.28145	-0.0178441	-0.00492483	-0.00604242	-0.00306219	-0.0070408		0.28145	-0.0224411	-0.0106469	-0.0242442	-0.0101253	-0.0112876	-0.0244193
0.281867	-0.0188425	-0.00439584	-0.00535697	-0.00405312	-0.00669807		0.281867	-0.0216961	-0.00975281	-0.0234246	-0.0117645	-0.00960194	-0.0258163
0.282283	-0.0202879	-0.00341982	-0.00439584	-0.00445545	-0.00686199		0.282283	-0.0221431	-0.00904501	-0.0229254	-0.0132248	-0.00843778	-0.0253357
0.2827	-0.0202432	-0.00223517	-0.00294298	-0.00472367	-0.00765175		0.2827	-0.0229105	-0.0089407	-0.0222772	-0.0142008	-0.00762753	-0.0227876
0.283117	-0.0186935	-0.000961125	-0.00121444	-0.00532717	-0.00867993		0.283117	-0.023447	-0.00959635	-0.021033	-0.0143051	-0.00664964	-0.0200048
0.283533	-0.0175089	0.000171363	0.000461936	-0.00663102	-0.00946969		0.283533	-0.0243038	-0.0112429	-0.0199899	-0.0136271	-0.00531785	-0.0192337
0.28395	-0.0173673	0.000938773	0.00211597	-0.00872463	-0.0104681		0.28395	-0.0263229	-0.0134632	-0.0201091	-0.0128523	-0.00411645	-0.0204071
0.284367	-0.0170916	0.00103563	0.00341982	-0.0107437	-0.0106841		0.284367	-0.0289604	-0.0157133	-0.0213236	-0.0121295	-0.0036601	-0.0216812
0.284783	-0.0159964	0.000923872	0.00334531	-0.0124201	-0.00965595		0.284783	-0.0305772	-0.0180751	-0.0230595	-0.0112578	-0.00385567	-0.0232123
0.2852	-0.0148788	0.000588596	0.00164658	-0.0131577	-0.00812113		0.2852	-0.031136	-0.0196248	-0.0246018	-0.0101924	-0.00468455	-0.0255369
0.285617	-0.0146851	-0.00012666	-0.000715256	-0.012815	-0.00728667		0.285617	-0.0316948	-0.0196546	-0.0255406	-0.00910461	-0.0060536	-0.027962
0.286033	-0.0151619	-0.00168383	-0.00246614	-0.011608	-0.00740588		0.286033	-0.0331849	-0.018172	-0.0255555	-0.00799447	-0.00763684	-0.0293143
0.28645	-0.0157431	-0.00366569	-0.0032559	-0.0102147	-0.00688434		0.28645	-0.0352487	-0.0158101	-0.0245869	-0.00675768	-0.00878237	-0.0287443
0.286867	-0.0164583	-0.00513345	-0.00332296	-0.00923127	-0.00561029		0.286867	-0.0366941	-0.0135005	-0.022985	-0.00578165	-0.00890344	-0.0272132
0.287283	-0.0179559	-0.00630319	-0.00254065	-0.00807643	-0.00414252		0.287283	-0.0371858	-0.0115633	-0.0213459	-0.00488013	-0.00868924	-0.0250898
0.2877	-0.0203773	-0.00692159	-0.00102073	-0.00684708	-0.00336766		0.2877	-0.0371411	-0.0104532	-0.0202283	-0.00395626	-0.00882894	-0.0226647
0.288117	-0.0228435	-0.00709295	0.000841916	-0.00592321	-0.00311434		0.288117	-0.0368059	-0.0102669	-0.0198781	-0.00301003	-0.00898726	-0.0212565
0.288533	-0.0243336	-0.00625104	0.00207871	-0.00600517	-0.0025481		0.288533	-0.0355244	-0.0109002	-0.0200197	-0.00226498	-0.00941567	-0.0209436
0.28895	-0.024654	-0.00482798	0.0019297	-0.00616163	-0.00159442		0.28895	-0.0326633	-0.0120327	-0.0205263	-0.00201911	-0.010347	-0.021223
0.289367	-0.024341	-0.00386685	0.000730157	-0.00555813	-0.000625849		0.289367	-0.0291318	-0.0126809	-0.0215396	-0.00196695	-0.0117999	-0.0214018
0.289783	-0.0237375	-0.00347197	-0.000424683	-0.00484288	2.23517e-05		0.289783	-0.0264943	-0.0122711	-0.0225455	-0.00214577	-0.0124052	-0.0220835
0.2902	-0.0229105	-0.00347942	-0.000692904	-0.0045225	0.000886619		0.2902	-0.0249669	-0.0113472	-0.0231788	-0.0019446	-0.0115484	-0.0235029
0.290617	-0.0217035	-0.00340492	-0.000320375	-0.00487268	0.00225753		0.290617	-0.023663	-0.0113696	-0.023298	-0.0019595	-0.0104588	-0.0247099
0.291033	-0.0201166	-0.00378489	-0.000223517	-0.00535697	0.00371784		0.291033	-0.0221804	-0.0127107	-0.0229254	-0.00302494	-0.00933185	-0.0262633
0.29145	-0.0184849	-0.00452995	-0.000499189	-0.00604242	0.0045076		0.29145	-0.0213608	-0.0145957	-0.0220761	-0.00479817	-0.00850297	-0.0290014
0.291867	-0.0175089	-0.00466406	-0.000581145	-0.00680238	0.00457466		0.291867	-0.0212491	-0.0165254	-0.0206903	-0.00653416	-0.00828877	-0.0318401
0.292283	-0.0176728	-0.00364333	-0.000424683	-0.00680238	0.00411272		0.292283	-0.0206456	-0.0180975	-0.0192299	-0.00788271	-0.00916421	-0.0331141
0.2927	-0.0187457	-0.0018552	-0.000320375	-0.00585616	0.00317395		0.2927	-0.0196397	-0.0187829	-0.0181198	-0.00976026	-0.0106078	-0.0331812
0.293117	-0.0200868	-2.98023e-05	-0.000283122	-0.00413507	0.00219047		0.293117	-0.019297	-0.0180155	-0.0173971	-0.0111535	-0.0117254	-0.0330806
0.293533	-0.0214353	0.00137091	0.000290573	-0.00248104	0.00158697		0.293533	-0.0201985	-0.0161305	-0.0170469	-0.010781	-0.0132062	-0.0318177
0.29395	-0.022985	0.0019148	0.00163913	-0.00163913	0.00142306		0.29395	-0.0212267	-0.0141785	-0.0172928	-0.00881404	-0.0147801	-0.0278056
0.294367	-0.0239387	0.00153482	0.0031814	-0.00217557	0.00105053		0.294367	-0.0218675	-0.0128299	-0.0180826	-0.006482	-0.0155345	-0.0224747
0.294783	-0.0234693	0.000648201	0.00419468	-0.00464171	0.000327826		0.294783	-0.0227988	-0.012368	-0.0192672	-0.00510365	-0.0151433	-0.0187308
0.2952	-0.0213608	-0.000566244	0.00442564	-0.00814349	-0.000737607		0.2952	-0.0237301	-0.0125244	-0.0206903	-0.00432134	-0.0145938	-0.0174344
0.295617	-0.0187308	-0.00252575	0.00415742	-0.0113174	-0.00213087		0.295617	-0.024192	-0.0131428	-0.0217706	-0.00459701	-0.0146963	-0.0174902
0.296033	-0.0169501	-0.00479072	0.00391155	-0.0129268	-0.00357628		0.296033	-0.0244379	-0.0140592	-0.0222474	-0.00599772	-0.0145845	-0.0175908
0.29645	-0.0163764	-0.00659376	0.00401586	-0.0129938	-0.00493973		0.29645	-0.0255182	-0.0151917	-0.0221729	-0.00749528	-0.0140071	-0.0184178
0.296867	-0.0173002	-0.00783801	0.00394136	-0.0122488	-0.00578165		0.296867	-0.0273287	-0.0165775	-0.0221804	-0.00780076	-0.0136159	-0.0201948
0.297283	-0.0191033	-0.00896305	0.00367314	-0.0108555	-0.00613928		0.297283	-0.0288486	-0.017941	-0.0223815	-0.00589341	-0.0140816	-0.0218935
0.2977	-0.0211522	-0.00965595	0.00358373	-0.00945479	-0.00583381		0.2977	-0.0295863	-0.0193343	-0.0217855	-0.00341237	-0.0147335	-0.0221394
0.298117	-0.0230968	-0.00924617	0.00382215	-0.00850856	-0.00488013		0.298117	-0.0296161	-0.0201613	-0.0203177	-0.00163913	-0.0146031	-0.0205524
0.298533	-0.0247508	-0.00826269	0.00400096	-0.00840425	-0.00408292		0.298533	-0.0290647	-0.0199378	-0.0189319	-0.00089407	-0.0138395	-0.0191331
0.29895	-0.0254884	-0.00735372	0.00356883	-0.00875443	-0.00406057		0.29895	-0.0279471	-0.0184774	-0.0185817	-0.00130385	-0.0127591	-0.0180937
0.299367	-0.024572	-0.00697374	0.00346452	-0.00896305	-0.00493973		0.299367	-0.0265986	-0.0159293	-0.0190586	-0.00271201	-0.0114553	-0.016965
0.299783	-0.0227466	-0.00727177	0.00373274	-0.00890344	-0.0057891		0.299783	-0.0251979	-0.0132248	-0.0197366	-0.00537932	-0.00998378	-0.0154786
0.3002	-0.0217557	-0.0083968	0.00360608	-0.00828505	-0.00585616		0.3002	-0.0242814	-0.0110716	-0.0209659	-0.00834465	-0.00898726	-0.0142157
0.300617	-0.0218451	-0.00990182	0.002563	-0.0071153	-0.00560284		0.300617	-0.0244528	-0.0101924	-0.023298	-0.0104979	-0.00871718	-0.0140704
0.301033	-0.0217631	-0.0105724	0.000655651	-0.00550598	-0.00534207		0.301033	-0.0252426	-0.0108704	-0.02601	-0.0113472	-0.0086613	-0.0143498
0.30145	-0.0213534	-0.0101477	-0.00154227	-0.0038445	-0.00468642		0.30145	-0.0255555	-0.0126883	-0.027582	-0.0110045	-0.00859611	-0.0153333
0.301867	-0.0213757	-0.00912696	-0.00380725	-0.00245124	-0.0031665		0.301867	-0.0247806	-0.0147745	-0.027597	-0.010401	-0.00861473	-0.0167303
0.302283	-0.0216737	-0.00815093	-0.0057295	-0.00105798	-0.00178069		0.302283	-0.0239015	-0.0157282	-0.0270382	-0.00983477	-0.00846572	-0.0181943
0.3027	-0.021033	-0.00715256	-0.00726432	0.000566244	-0.00221282		0.3027	-0.0236258	-0.0153333	-0.0267848	-0.0090301	-0.0075344	-0.0199713
0.303117	-0.0190586	-0.005804	-0.00844151	0.00250339	-0.00464171		0.303117	-0.0237375	-0.0142232	-0.0264347	-0.00800937	-0.00637025	-0.0221059
0.303533	-0.0170395	-0.00443309	-0.00893325	0.00439584	-0.00774115		0.303533	-0.0243559	-0.0130013	-0.0258163	-0.00736862	-0.00582077	-0.0239052
0.30395	-0.0162721	-0.00355393	-0.00847876	0.00546873	-0.0103787		0.30395	-0.0255778	-0.0120774	-0.0253841	-0.00689924	-0.00628643	-0.0250563
0.304367	-0.017032	-0.00324845	-0.00755489	0.00543892	-0.0124276		0.304367	-0.0274032	-0.0117719	-0.0250191	-0.00619143	-0.00715256	-0.0263527
0.304783	-0.0190735	-0.00288338	-0.00667572	0.00452995	-0.0139102		0.304783	-0.0294894	-0.0128523	-0.0240505	-0.00516325	-0.00795349	-0.0284873
0.3052	-0.0215918	-0.00219047	-0.00552833	0.00345707	-0.0142902		0.3052	-0.0315979	-0.0151396	-0.021711	-0.0044629	-0.00923872	-0.0300072
0.305617	-0.0240654	-0.00205636	-0.00403822	0.00239164	-0.012897		0.305617	-0.0332892	-0.0175685	-0.0189096	-0.00439584	-0.0105612	-0.0295602
0.306033	-0.0257716	-0.00311434	-0.00242144	0.00168383	-0.0103936		0.306033	-0.0337213	-0.0192076	-0.0169724	-0.00442564	-0.0115018	-0.0280738
0.30645	-0.0259131	-0.00476837	-0.00111759	0.00149757	-0.00774115		0.30645	-0.0331253	-0.019975	-0.0164434	-0.00496954	-0.0117719	-0.0263527
0.306867	-0.023894	-0.00620633	0	0.00181794	-0.00558793		0.306867	-0.0321418	-0.020586	-0.0168979	-0.00589341	-0.011744	-0.0246316
0.307283	-0.0201538	-0.00742823	0.000849366	0.00233203	-0.00417233		0.307283	-0.0309199	-0.0208616	-0.0172704	-0.00647455	-0.0122096	-0.0225753
0.3077	-0.0165477	-0.00905991	0.000976026	0.00233203	-0.0031814		0.3077	-0.0293776	-0.020057	-0.0176802	-0.00573695	-0.012964	-0.020586
0.308117	-0.0144541	-0.0103414	0.000573695	0.00192225	-0.00301748		0.308117	-0.0274405	-0.0183135	-0.0182912	-0.00349432	-0.0138395	-0.0191778
0.308533	-0.0141039	-0.0103638	5.96046e-05	0.00102818	-0.00365078		0.308533	-0.0254512	-0.0164509	-0.0188649	-0.00133365	-0.0144169	-0.0185966
0.30895	-0.0147522	-0.00942498	2.23517e-05	-0.000149012	-0.00513345		0.30895	-0.0241324	-0.0148267	-0.0189096	-0.000476837	-0.0143144	-0.0194125
0.309367	-0.015758	-0.00804663	0.00012666	-0.00142306	-0.0070855		0.309367	-0.0240728	-0.0127032	-0.0186935	-0.00115484	-0.0139419	-0.0212006
0.309783	-0.017263	-0.00637025	0.000171363	-0.0025332	-0.00847876		0.309783	-0.0249222	-0.0104755	-0.0189468	-0.00277907	-0.0134762	-0.0228323
0.3102	-0.0186116	-0.00395626	0.000409782	-0.0031665	-0.00925362		0.3102	-0.0255853	-0.0096038	-0.0196546	-0.00438094	-0.0127777	-0.024084
0.310617	-0.0192747	-0.00154227	0.00064075	-0.00328571	-0.00946969		0.310617	-0.0260919	-0.0104159	-0.0200048	-0.00589341	-0.0116136	-0.0261068
0.311033	-0.0191703	-0.000543892	0.00102073	-0.00280142	-0.00936538		0.311033	-0.0270829	-0.0121072	-0.0196621	-0.00727922	-0.0101794	-0.0288896
0.31145	-0.0187829	-0.000908971	0.00163913	-0.00181049	-0.00851601		0.31145	-0.0280812	-0.0139326	-0.0193939	-0.00791252	-0.00884756	-0.0304654
0.311867	-0.018701	-0.00176579	0.00244379	-0.000722706	-0.00669807		0.311867	-0.0280589	-0.0158325	-0.0193268	-0.00744313	-0.00742264	-0.0300184
0.312283	-0.0182465	-0.00261515	0.00321865	-0.000149012	-0.00468642		0.312283	-0.0271127	-0.0173897	-0.019148	-0.00622124	-0.00533648	-0.0283867
0.3127	-0.0172779	-0.00368059	0.00371039	-0.000424683	-0.00301748		0.3127	-0.0261515	-0.0177249	-0.0184476	-0.00579655	-0.00342727	-0.0272132
0.313117	-0.0166446	-0.00476092	0.00413507	-0.00121444	-0.00160188		0.313117	-0.0253171	-0.016816	-0.0178069	-0.00657141	-0.00265427	-0.0265203
0.313533	-0.0169948	-0.00501424	0.00434369	-0.00225007	0.000119209		0.313533	-0.0242665	-0.0157356	-0.01771	-0.00742078	-0.00249594	-0.0255816
0.31395	-0.0181496	-0.0045225	0.00406057	-0.00330806	0.00178069		0.31395	-0.0233129	-0.0152662	-0.0175089	-0.0077039	-0.00222586	-0.0248216
0.314367	-0.0193194	-0.00434369	0.00336021	-0.00380725	0.00242144		0.314367	-0.0227839	-0.0153631	-0.0169724	-0.00772625	-0.00124797	-0.0241958
0.314783	-0.0200719	-0.00447035	0.00211597	-0.00334531	0.00204146		0.314783	-0.0226423	-0.0156835	-0.0165105	-0.00815839	-0.000121072	-0.0239834
0.3152	-0.020504	-0.00399351	0.000879169	-0.00167638	0.00148267		0.3152	-0.0226721	-0.0164136	-0.0167266	-0.00870228	0.00128523	-0.0234805
0.315617	-0.020355	-0.00290573	0.000484288	0.000171363	0.00157952		0.315617	-0.0228584	-0.0178963	-0.0173897	-0.00889599	0.00232831	-0.0224523
0.316033	-0.0196844	-0.00181794	0.000692904	0.00136346	0.0019148		0.316033	-0.023447	-0.0193939	-0.0179037	-0.00903755	0.001546	-0.0221059
0.31645	-0.0187755	-0.00117719	0.000454485	0.00210851	0.00201166		0.31645	-0.0240281	-0.0199974	-0.0180826	-0.00926107	-0.00111759	-0.022877
0.316867	-0.0177994	-0.000685453	-0.000752509	0.00244379	0.00246614		0.316867	-0.024423	-0.0195131	-0.0180155	-0.00903755	-0.00480562	-0.0248328
0.317283	-0.0169352	-0.000596046	-0.00172108	0.00199676	0.00336021		0.317283	-0.0246316	-0.0184625	-0.0176579	-0.00815093	-0.00840984	-0.0269897
0.3177	-0.0164062	-0.00167638	-0.00164658	0.000476837	0.00422448		0.3177	-0.0246242	-0.0173748	-0.0169724	-0.00736117	-0.0117719	-0.0288002
0.318117	-0.016436	-0.00394136	-0.000812113	-0.00122935	0.00420958		0.318117	-0.0245571	-0.0160709	-0.0161529	-0.00738353	-0.014063	-0.0301637
0.318533	-0.016734	-0.00683963	0.00037998	-0.00215322	0.00292063		0.318533	-0.0242814	-0.0145733	-0.0153184	-0.00791997	-0.0144262	-0.0300407
0.31895	-0.0169203	-0.00956654	0.00170618	-0.00240654	0.000782311		0.31895	-0.0237226	-0.0130534	-0.0150055	-0.00854582	-0.0132807	-0.0281073
0.319367	-0.0165626	-0.0114962	0.00289828	-0.00283122	-0.00231713		0.319367	-0.022836	-0.0120327	-0.015825	-0.00946969	-0.0117905	-0.0252128
0.319783	-0.0165254	-0.0126436	0.00334531	-0.00346452	-0.00557303		0.319783	-0.02186	-0.0118539	-0.0179261	-0.0105053	-0.01112	-0.0224635
0.3202	-0.0174791	-0.0130162	0.00275671	-0.003919	-0.00806153		0.3202	-0.0212938	-0.012055	-0.0205487	-0.0107363	-0.0111572	-0.0202395
0.320617	-0.0190586	-0.0124425	0.00152737	-0.0039041	-0.00935793		0.320617	-0.0207797	-0.0124648	-0.022471	-0.00977516	-0.0110269	-0.0178255
0.321033	-0.0202283	-0.0106841	0.000521541	-0.00341237	-0.00927597		0.321033	-0.0197813	-0.0130385	-0.0233799	-0.008367	-0.010049	-0.0161938
0.32145	-0.0208542	-0.00825524	0.000372529	-0.00294298	-0.00841916		0.32145	-0.0186712	-0.0133738	-0.0237748	-0.00741333	-0.00861473	-0.0166073
0.321867	-0.0221953	-0.00650436	0.00120699	-0.00239909	-0.00673533		0.321867	-0.0183284	-0.0131577	-0.0239611	-0.00695884	-0.0076741	-0.0183396
0.322283	-0.0240877	-0.0057295	0.00306219	-0.00151247	-0.0050813		0.322283	-0.0189096	-0.0124723	-0.0236481	-0.00688434	-0.00733882	-0.0203066
0.3227	-0.0252202	-0.00558048	0.00570715	-0.000312924	-0.00477582		0.3227	-0.0197142	-0.012219	-0.0232235	-0.00716001	-0.00738539	-0.0221729
0.323117	-0.0244975	-0.00562519	0.00777841	0.000551343	-0.00613183		0.323117	-0.0202581	-0.0129566	-0.0239536	-0.00727177	-0.0078138	-0.0247546
0.323533	-0.0229925	-0.00591576	0.00788271	0.000424683	-0.00851601		0.323533	-0.0205785	-0.0142232	-0.025928	-0.00690669	-0.00917353	-0.0272579
0.32395	-0.0219569	-0.00630319	0.00609457	-0.000566244	-0.0103489		0.32395	-0.0210255	-0.0160336	-0.0274032	-0.00651926	-0.0111666	-0.0286438
0.324367	-0.0212714	-0.00612438	0.00404567	-0.00209361	-0.0109896		0.324367	-0.0218228	-0.017792	-0.0270456	-0.00680983	-0.0126846	-0.0295825
0.324783	-0.0198111	-0.00505894	0.00238419	-0.00410527	-0.0106469		0.324783	-0.0225902	-0.0188798	-0.0255108	-0.00728667	-0.0135787	-0.0307001
0.3252	-0.0171065	-0.00343472	0.000722706	-0.00670552	-0.00943243		0.3252	-0.0227317	-0.0188872	-0.0233799	-0.00712275	-0.0142492	-0.0316389
0.325617	-0.014551	-0.00167638	-0.000573695	-0.00932068	-0.00753254		0.325617	-0.0225678	-0.0181794	-0.0205263	-0.0070706	-0.0144541	-0.0317171
0.326033	-0.0124425	-0.000476837	-0.000372529	-0.0109226	-0.00511855		0.326033	-0.0234023	-0.0175014	-0.0171885	-0.00772625	-0.0133645	-0.0311248
0.32645	-0.0100434	-0.000193715	0.00146776	-0.0107065	-0.00305474		0.32645	-0.0249669	-0.0169724	-0.0150129	-0.00821054	-0.0109244	-0.0305548
0.326867	-0.00724196	-0.000759959	0.00378489	-0.00851601	-0.00250339		0.326867	-0.0263527	-0.0169277	-0.0147372	-0.00810623	-0.0085216	-0.0295714
0.327283	-0.00549853	-0.00187755	0.00566989	-0.00523776	-0.00356138		0.327283	-0.027433	-0.0177324	-0.0152513	-0.00838935	-0.00660308	-0.0275597
0.3277	-0.00590831	-0.00257045	0.00710785	-0.00175089	-0.00557303		0.3277	-0.0288859	-0.0193268	-0.0156388	-0.00964105	-0.00473112	-0.0249557
0.328117	-0.00762939	-0.00280887	0.00828505	0.00102073	-0.00751018		0.328117	-0.0308976	-0.0204518	-0.0159964	-0.0107586	-0.00350177	-0.0224076
0.328533	-0.00991672	-0.00285357	0.00838935	0.00227243	-0.00831485		0.328533	-0.0323206	-0.0205785	-0.0170246	-0.01093	-0.00332482	-0.0207871
0.32895	-0.0124276	-0.00312924	0.00740588	0.00220537	-0.00777096		0.32895	-0.0329986	-0.0201687	-0.017859	-0.0110045	-0.0041537	-0.0196248
0.329367	-0.014618	-0.00371784	0.00599027	0.0012964	-0.0064224		0.329367	-0.0323579	-0.0199452	-0.0180826	-0.0109598	-0.00465661	-0.0185743
0.329783	-0.0160709	-0.00428408	0.00485033	0.00064075	-0.00461191		0.329783	-0.029847	-0.0200421	-0.01847	-0.00978261	-0.00395812	-0.0180267
0.3302	-0.0168756	-0.00536442	0.00409782	0.000350177	-0.00245124		0.3302	-0.0261143	-0.0202581	-0.0196993	-0.007689	-0.00284985	-0.0172891
0.330617	-0.0172332	-0.00698119	0.00345707	-0.000186265	2.23517e-05		0.330617	-0.0222102	-0.0208691	-0.0214875	-0.00602752	-0.00208616	-0.0162162
0.331033	-0.0169352	-0.008367	0.00366569	-0.00106543	0.00172108		0.331033	-0.0193492	-0.0219494	-0.022985	-0.00557303	-0.00276603	-0.0146739
0.33145	-0.0163838	-0.00849366	0.00501424	-0.00239164	0.00161678		0.33145	-0.0175759	-0.0226572	-0.0244379	-0.00558048	-0.00435859	-0.0132546
0.331867	-0.0156835	-0.00725687	0.00689924	-0.00347942	5.96046e-05		0.331867	-0.0172555	-0.0219718	-0.0259429	-0.00547618	-0.00573695	-0.0128299
0.332283	-0.0143275	-0.00604987	0.00849366	-0.00429898	-0.00208616		0.332283	-0.018537	-0.0198334	-0.0267625	-0.0058189	-0.00634231	-0.0131875
0.3327	-0.0120997	-0.0050813	0.00911206	-0.00482798	-0.00364333		0.3327	-0.0206679	-0.0170395	-0.02639	-0.00686199	-0.00649132	-0.0151545
0.333117	-0.0102445	-0.00418723	0.00860542	-0.00486523	-0.00457466		0.333117	-0.0230744	-0.014782	-0.0252202	-0.00800937	-0.00703148	-0.0180267
0.333533	-0.00979751	-0.00339001	0.00701845	-0.00460446	-0.00527501		0.333533	-0.0252128	-0.0132322	-0.0237823	-0.00853092	-0.0078138	-0.0207424
0.33395	-0.00996143	-0.00351667	0.00507384	-0.00392646	-0.00558048		0.33395	-0.0270605	-0.0125989	-0.0223592	-0.00867993	-0.00869855	-0.0229329
0.334367	-0.0103414	-0.00476837	0.00370294	-0.00340492	-0.00485778		0.334367	-0.0284016	-0.0131577	-0.0210479	-0.00916421	-0.00955537	-0.0244081
0.334783	-0.0115484	-0.00569969	0.00303239	-0.0032708	-0.00283122		0.334783	-0.0294372	-0.0148639	-0.0206232	-0.00952929	-0.010049	-0.0251681
0.3352	-0.0136867	-0.00625849	0.00292063	-0.0032261	-0.000454485		0.3352	-0.0305921	-0.0171736	-0.0216588	-0.00891089	-0.0100024	-0.0244863
0.335617	-0.0150949	-0.00690669	0.0032261	-0.00286847	0.000938773		0.335617	-0.0311732	-0.0184327	-0.0235736	-0.00735372	-0.00949949	-0.0231229
0.336033	-0.014782	-0.00803173	0.00365824	-0.00205636	0.000707805		0.336033	-0.0306666	-0.0182018	-0.0255182	-0.00568479	-0.00846572	-0.0217594
0.33645	-0.0135824	-0.00880659	0.00359863	-0.00183284	-0.000447035		0.33645	-0.0292659	-0.0172481	-0.0269264	-0.0039041	-0.00713393	-0.0206083
0.336867	-0.0123233	-0.00837445	0.00265986	-0.00264496	-0.00158697		0.336867	-0.0280365	-0.0166744	-0.027895	-0.00146776	-0.00621192	-0.0196584
0.337283	-0.0106245	-0.00739843	0.00156462	-0.00356883	-0.00222027		0.337283	-0.0274703	-0.0168905	-0.0282526	0.000923872	-0.00655651	-0.0194013
0.3377	-0.00859052	-0.00680983	0.00153482	-0.0037998	-0.00298023		0.3377	-0.026904	-0.0173002	-0.0279248	0.00228733	-0.00733882	-0.0208877
0.338117	-0.00724196	-0.00709295	0.00286847	-0.0038445	-0.00423938		0.338117	-0.0261217	-0.0182241	-0.0271574	0.00248849	-0.00703148	-0.0234693
0.338533	-0.00649691	-0.00789762	0.0045225	-0.00485778	-0.00568479		0.338533	-0.0255182	-0.0193715	-0.0265241	0.00219047	-0.00575557	-0.0253916
0.33895	-0.00566244	-0.00868738	0.00533462	-0.00631809	-0.00663847		0.33895	-0.0255257	-0.0196546	-0.0259057	0.00161678	-0.00461936	-0.025738
0.339367	-0.00467897	-0.00896305	0.00521541	-0.0071153	-0.00663847		0.339367	-0.0258237	-0.0183806	-0.0248924	0.000469387	-0.00447035	-0.0250451
0.339783	-0.00473857	-0.0083223	0.00471622	-0.00765175	-0.00625104		0.339783	-0.0259951	-0.0159293	-0.0234097	-0.000938773	-0.0049267	-0.0246093
0.3402	-0.00579655	-0.00692159	0.00399351	-0.00862777	-0.00534207		0.3402	-0.0260174	-0.0137612	-0.021629	-0.00244379	-0.00574626	-0.0235252
0.340617	-0.00651181	-0.00505149	0.00284612	-0.00941753	-0.00389665		0.340617	-0.0263378	-0.0124201	-0.0201985	-0.00417978	-0.00672415	-0.0209771
0.341033	-0.00693649	-0.00264496	0.0019446	-0.00889599	-0.00170618		0.341033	-0.0272319	-0.0121966	-0.0190809	-0.00595301	-0.0071153	-0.0185631
0.34145	-0.00766665	0.000230968	0.00171363	-0.00750273	0.000707805		0.34145	-0.028573	-0.0132024	-0.0184178	-0.00742823	-0.00621192	-0.0170879
0.341867	-0.00885129	0.0026077	0.00240654	-0.00667572	0.00278652		0.341867	-0.0299215	-0.0148863	-0.0181422	-0.00834465	-0.00453554	-0.0164397
0.342283	-0.00961125	0.0032708	0.0032708	-0.00709295	0.00421703		0.342283	-0.0304431	-0.0163987	-0.0177473	-0.00891089	-0.00321306	-0.0154451
0.3427	-0.00945479	0.00249594	0.00300258	-0.00864267	0.00419468		0.3427	-0.0299066	-0.0173002	-0.0171885	-0.00914186	-0.00237487	-0.0150427
0.343117	-0.00935048	0.00153482	0.00143051	-0.0104904	0.00335276		0.343117	-0.0290275	-0.0176653	-0.0163168	-0.00877678	-0.00188127	-0.0164509
0.343533	-0.00947714	0.00119209	-0.000730157	-0.011906	0.00266731		0.343533	-0.0280514	-0.0172406	-0.0152066	-0.00778586	-0.00224449	-0.0186302
0.34395	-0.009574	0.00105798	-0.00229478	-0.0124946	0.00209361		0.34395	-0.026606	-0.0161827	-0.0141487	-0.00638515	-0.00405125	-0.0206083
0.344367	-0.00943243	0.000245869	-0.00361353	-0.0124276	0.000476837		0.344367	-0.024274	-0.0152886	-0.0135452	-0.00514835	-0.00658445	-0.0213906
0.344783	-0.00860542	-0.00104308	-0.00540167	-0.0117794	-0.00196695		0.344783	-0.021942	-0.0145733	-0.0142083	-0.0045076	-0.00875443	-0.0215694
0.3452	-0.00733882	-0.0019744	-0.00695139	-0.0107139	-0.0038445		0.3452	-0.0211671	-0.0132173	-0.0162125	-0.00457466	-0.0105891	-0.0215918
0.345617	-0.00587106	-0.00223517	-0.00715256	-0.0102669	-0.00448525		0.345617	-0.0217855	-0.0113025	-0.0188574	-0.00498444	-0.0121724	-0.0212118
0.346033	-0.00467897	-0.00231713	-0.00634044	-0.0109002	-0.00432879		0.346033	-0.0229329	-0.0103191	-0.0216141	-0.00555068	-0.0124425	-0.0199713
0.34645	-0.00383705	-0.00255555	-0.00549853	-0.0121891	-0.0037998		0.34645	-0.0237077	-0.0108704	-0.0237375	-0.0064671	-0.0111852	-0.0182055
0.346867	-0.00305474	-0.00242889	-0.00465661	-0.013344	-0.00277162		0.346867	-0.0240356	-0.011839	-0.0247806	-0.00783056	-0.00934117	-0.0182614
0.347283	-0.00269711	-0.00230223	-0.0031814	-0.0143275	-0.00181794		0.347283	-0.0239834	-0.0123978	-0.0246912	-0.00929087	-0.00760891	-0.020843
0.3477	-0.00251085	-0.0025183	-0.00105053	-0.0152066	-0.000841916		0.3477	-0.0232831	-0.0127181	-0.0237674	-0.0103787	-0.00632368	-0.0239946
0.348117	-0.00187755	-0.00330806	0.000216067	-0.0158995	0.000104308		0.348117	-0.0219047	-0.0130534	-0.0223219	-0.0109151	-0.00576489	-0.025671
0.348533	-0.000670552	-0.00439584	0.000230968	-0.0165179	0.000521541		0.348533	-0.0200719	-0.0132322	-0.0204146	-0.01093	-0.00700355	-0.0261627
0.34895	7.45058e-06	-0.00555813	-0.000558794	-0.0171289	0.000484288		0.34895	-0.0183061	-0.0129566	-0.0187904	-0.0106171	-0.00962987	-0.0267997
0.349367	-0.000528991	-0.00665337	-0.00160188	-0.0171512	0.000484288		0.349367	-0.0173077	-0.0125766	-0.0186935	-0.0102222	-0.0118837	-0.0263304
0.349783	-0.0013411	-0.00692904	-0.00225007	-0.0166073	0.000916421		0.349783	-0.0174418	-0.0127405	-0.0202358	-0.0101104	-0.0126939	-0.0235029
0.3502	-0.00207871	-0.00663847	-0.00245869	-0.0161082	0.00104308		0.3502	-0.0184029	-0.0135005	-0.0221431	-0.0101775	-0.0120234	-0.0193343
0.350617	-0.00313669	-0.00609457	-0.00173599	-0.0152588	0.000834465		0.350617	-0.0200197	-0.01432	-0.0240803	-0.0106767	-0.0108685	-0.0161938
0.351033	-0.00473112	-0.00564754	-0.000320375	-0.0132099	0.00116229		0.351033	-0.0222251	-0.0144467	-0.0261217	-0.0114813	-0.00921078	-0.0156574
0.35145	-0.00563264	-0.00533462	0.00122189	-0.0103936	0.00168383		0.35145	-0.0250712	-0.0142157	-0.0279322	-0.0120178	-0.006482	-0.0169426
0.351867	-0.0051409	-0.00526756	0.00233203	-0.00874698	0.00154972		0.351867	-0.028044	-0.014469	-0.0283867	-0.011839	-0.00334345	-0.0187755
0.352283	-0.0045374	-0.00565499	0.00268221	-0.0083074	0.000976026		0.352283	-0.0305474	-0.0148639	-0.0275001	-0.0105575	-0.00173226	-0.0194348
0.3527	-0.00455231	-0.00593811	0.00263006	-0.00777096	0.00117719		0.3527	-0.0327006	-0.0147	-0.0266805	-0.00873208	-0.00273809	-0.018239
0.353117	-0.00477582	-0.00595301	0.00227988	-0.00695884	0.00217557		0.353117	-0.0342131	-0.013873	-0.0259653	-0.00683218	-0.00513159	-0.0157692
0.353533	-0.00467151	-0.00626594	0.00210106	-0.00686944	0.00301748		0.353533	-0.0343695	-0.0129417	-0.0247583	-0.0057146	-0.00756234	-0.0130534
0.35395	-0.00420958	-0.00742078	0.00272691	-0.00761449	0.00347197		0.35395	-0.0324771	-0.0121072	-0.0231266	-0.00587106	-0.00989065	-0.0111759
0.354367	-0.00330806	-0.00876188	0.0044629	-0.00821054	0.00371784		0.354367	-0.0294372	-0.0105575	-0.0217408	-0.00697374	-0.0125915	-0.0104718
0.354783	-0.00170618	-0.00943989	0.00649691	-0.00867248	0.00388175		0.354783	-0.026986	-0.00853836	-0.0208765	-0.00843406	-0.0144262	-0.0114217
0.3552	0.000163913	-0.00995398	0.0076443	-0.00920892	0.00368059		0.3552	-0.0254288	-0.00691414	-0.0197887	-0.0096485	-0.0139978	-0.0139698
0.355617	0.00184774	-0.0110343	0.00815093	-0.00982732	0.00290573		0.355617	-0.0242814	-0.0064373	-0.0187531	-0.0102818	-0.0117999	-0.0174455
0.356033	0.00290573	-0.0123754	0.00809878	-0.0103861	0.00140816		0.356033	-0.0234544	-0.00733882	-0.0184327	-0.0100136	-0.00917353	-0.020206
0.35645	0.00295788	-0.0129268	0.00689924	-0.0109524	-0.000648201		0.35645	-0.0235662	-0.00876933	-0.0188947	-0.00883639	-0.00733882	-0.0208542
0.356867	0.00143051	-0.0125989	0.00448525	-0.0111386	-0.00252575		0.356867	-0.0246465	-0.0101551	-0.0199825	-0.00680983	-0.00569969	-0.0194684
0.357283	-0.000722706	-0.0121072	0.00175089	-0.0101924	-0.00464171		0.357283	-0.0256225	-0.0112802	-0.0211895	-0.00450015	-0.00380911	-0.0174232
0.3577	-0.00239909	-0.0116453	-0.000275671	-0.00844151	-0.00687689		0.3577	-0.0261888	-0.0121146	-0.0220239	-0.00255555	-0.00243075	-0.016205
0.358117	-0.00374019	-0.0109076	-0.00161678	-0.00682473	-0.00850111		0.358117	-0.0265613	-0.011906	-0.0216141	-0.0013411	-0.00206754	-0.0162944
0.358533	-0.00462681	-0.0100955	-0.0025332	-0.00625849	-0.00900775		0.358533	-0.0267625	-0.0101402	-0.0200272	-0.00105053	-0.00271015	-0.0172108
0.35895	-0.00487268	-0.00973791	-0.00321865	-0.00652671	-0.00856072		0.35895	-0.0267327	-0.00803918	-0.018619	-0.00148267	-0.00384636	-0.0177696
0.359367	-0.00439584	-0.0100136	-0.00400096	-0.00689179	-0.00817329		0.359367	-0.02639	-0.00721961	-0.0178143	-0.0025332	-0.00551343	-0.017982
0.359783	-0.00437349	-0.0101179	-0.00475347	-0.00726432	-0.00724942		0.359783	-0.0259131	-0.00785291	-0.01733	-0.00374764	-0.00789762	-0.0180714
0.3602	-0.00533462	-0.00984967	-0.00494719	-0.0083521	-0.00625104		0.3602	-0.0252128	-0.00934303	-0.0170842	-0.00496954	-0.00983477	-0.0178814
0.360617	-0.00628829	-0.00977516	-0.00470877	-0.0105202	-0.00614673		0.360617	-0.0245571	-0.0118017	-0.0175983	-0.00642985	-0.0107568	-0.017222
0.361033	-0.00669807	-0.00980496	-0.00473112	-0.012964	-0.00681728		0.361033	-0.0244677	-0.01508	-0.0190586	-0.00792742	-0.0110734	-0.0164956
0.36145	-0.00657141	-0.00983477	-0.00469387	-0.014782	-0.00753999		0.36145	-0.0249222	-0.0182167	-0.0204146	-0.00883639	-0.010794	-0.0164956
0.361867	-0.00600517	-0.00990927	-0.00369549	-0.0164881	-0.0070855		0.361867	-0.02563	-0.0206903	-0.0211224	-0.00882894	-0.00976957	-0.0164732
0.362283	-0.00526756	-0.0105053	-0.00182539	-0.018768	-0.00621378		0.362283	-0.0260472	-0.0226945	-0.0211373	-0.00905991	-0.00842847	-0.0161603
0.3627	-0.00461936	-0.0109524	-0.000648201	-0.0208989	-0.00567734		0.3627	-0.0258908	-0.0240877	-0.0210181	-0.00980496	-0.00795349	-0.0162832
0.363117	-0.00459701	-0.0103191	-0.00115484	-0.0217706	-0.00558793		0.363117	-0.0250936	-0.0239462	-0.0215024	-0.0103191	-0.00862405	-0.0163615
0.363533	-0.00490993	-0.0089705	-0.00239164	-0.0214353	-0.00592321		0.363533	-0.024125	-0.0218898	-0.0224859	-0.0101179	-0.00923872	-0.0152662
0.36395	-0.00506639	-0.00747293	-0.00344962	-0.0207499	-0.00627339		0.36395	-0.023663	-0.0190884	-0.0233054	-0.00981987	-0.00947155	-0.0132434
0.364367	-0.00527501	-0.00628084	-0.00425428	-0.0202432	-0.00670552		0.364367	-0.0236407	-0.0165403	-0.0234246	-0.00982732	-0.0100583	-0.0123046
0.364783	-0.00536442	-0.00531972	-0.00508875	-0.019893	-0.00694394		0.364783	-0.0237525	-0.0145286	-0.0228509	-0.0090301	-0.010822	-0.0130422
0.3652	-0.00527501	-0.00504404	-0.00540167	-0.0201613	-0.00668317		0.3652	-0.0240505	-0.0130013	-0.0223219	-0.00724196	-0.0108778	-0.0140592
0.365617	-0.00502914	-0.0057146	-0.00437349	-0.0213385	-0.00619888		0.365617	-0.0247583	-0.0120774	-0.0218004	-0.0051856	-0.00949018	-0.0152551
0.366033	-0.00523031	-0.00692904	-0.00298023	-0.0223666	-0.00598282		0.366033	-0.0258461	-0.0116527	-0.0212044	-0.00353157	-0.00749715	-0.0175573
0.36645	-0.00635535	-0.00816584	-0.00225007	-0.0223145	-0.00617653		0.36645	-0.0264943	-0.0110641	-0.0208691	-0.00228733	-0.00610016	-0.0202619
0.366867	-0.00774115	-0.00883639	-0.00239909	-0.0211149	-0.00669807		0.366867	-0.0264347	-0.010252	-0.0206381	-0.00167638	-0.00504777	-0.0215806
0.367283	-0.00888109	-0.00879169	-0.00301003	-0.0196397	-0.0076592		0.367283	-0.0263304	-0.00967085	-0.0206977	-0.00204891	-0.00395812	-0.0205189
0.3677	-0.00972301	-0.00849366	-0.00412762	-0.0181943	-0.00882894		0.3677	-0.0264421	-0.00952929	-0.0203252	-0.00330806	-0.00289641	-0.0179373
0.368117	-0.0101253	-0.00847876	-0.00590831	-0.0165999	-0.00958145		0.368117	-0.0266209	-0.00971556	-0.019528	-0.0051558	-0.00244938	-0.0157021
0.368533	-0.00974536	-0.00885874	-0.00707805	-0.0153929	-0.00930578		0.368533	-0.0265241	-0.0106767	-0.0182092	-0.00688434	-0.00220724	-0.0148416
0.36895	-0.00844151	-0.00936538	-0.00686199	-0.0157058	-0.00900775		0.36895	-0.0264719	-0.0124648	-0.0166148	-0.00818074	-0.00160188	-0.0152104
0.369367	-0.00678003	-0.00995398	-0.00587851	-0.017494	-0.00920147		0.369367	-0.0267327	-0.0141934	-0.0157952	-0.00891834	-0.000940636	-0.0153892
0.369783	-0.00565499	-0.0108555	-0.00528246	-0.0194311	-0.00877678		0.369783	-0.0269264	-0.0148788	-0.0160336	-0.00919402	-0.000922009	-0.0148863
0.3702	-0.00537187	-0.0117868	-0.00549853	-0.0200868	-0.00719726		0.3702	-0.0270829	-0.0143498	-0.0171289	-0.00883639	-0.00212342	-0.0148416
0.370617	-0.00585616	-0.0122562	-0.00635535	-0.0195354	-0.00520051		0.370617	-0.0275448	-0.0132546	-0.0178516	-0.00720471	-0.00434928	-0.0153221
0.371033	-0.00695139	-0.0118539	-0.00709295	-0.0191927	-0.00405312		0.371033	-0.0282302	-0.0118688	-0.0179783	-0.00478327	-0.00691973	-0.0159815
0.37145	-0.00872463	-0.0106618	-0.00728667	-0.0193194	-0.00354648		0.37145	-0.0286475	-0.0102893	-0.0173822	-0.00243634	-0.00840053	-0.0164621
0.371867	-0.01131	-0.00936538	-0.00697374	-0.0194758	-0.00330061		0.371867	-0.0282004	-0.00863522	-0.0161603	-0.000692904	-0.0083074	-0.0174567
0.372283	-0.0132844	-0.00871718	-0.00621378	-0.0195429	-0.00368804		0.372283	-0.0273883	-0.0071004	-0.014931	5.96046e-05	-0.00772066	-0.0198483
0.3727	-0.0136942	-0.00891834	-0.00488013	-0.0196695	-0.00486523		0.3727	-0.0270233	-0.00618398	-0.0142604	-0.000357628	-0.00699423	-0.0226535
0.373117	-0.0129417	-0.00964105	-0.00292808	-0.0196546	-0.00614673		0.373117	-0.0269189	-0.00604987	-0.0141785	-0.0018701	-0.00618398	-0.0237487
0.373533	-0.0119433	-0.0104681	-0.00166148	-0.0187978	-0.00640005		0.373533	-0.0267699	-0.00637025	-0.0144616	-0.00376999	-0.00573695	-0.02186
0.37395	-0.011228	-0.0114366	-0.00164658	-0.0173822	-0.00523031		0.37395	-0.0265017	-0.00697374	-0.0155494	-0.00553578	-0.0066217	-0.0187419
0.374367	-0.0105351	-0.0127256	-0.00198185	-0.0160113	-0.00288338		0.374367	-0.026986	-0.00760704	-0.0169501	-0.00729412	-0.00933185	-0.016652
0.374783	-0.010632	-0.0139177	-0.00165403	-0.0144616	-0.000193715		0.374783	-0.0287145	-0.00847876	-0.0176728	-0.00887364	-0.0121444	-0.0165738
0.3752	-0.0116676	-0.0142381	-0.000908971	-0.0126436	0.00175089		0.3752	-0.0307634	-0.00955164	-0.0175312	-0.00975281	-0.0139605	-0.0179708
0.375617	-0.0131577	-0.0134557	-0.000752509	-0.0110343	0.00242144		0.375617	-0.0320524	-0.0104308	-0.0177771	-0.0101402	-0.0144634	-0.0204407
0.376033	-0.0147074	-0.0124648	-0.00140071	-0.0103861	0.00158697		0.376033	-0.0320077	-0.0111088	-0.0186414	-0.0107735	-0.0139698	-0.0240617
0.37645	-0.0159964	-0.0120178	-0.00214577	-0.0105277	-0.00051409		0.37645	-0.0310913	-0.011079	-0.0189394	-0.0111833	-0.013262	-0.0276715
0.376867	-0.0170767	-0.011377	-0.00285357	-0.0112355	-0.00394136		0.376867	-0.029698	-0.010334	-0.0178888	-0.0105053	-0.0119675	-0.0303537
0.377283	-0.0178441	-0.00994652	-0.00395626	-0.0127256	-0.00821054		0.377283	-0.0275299	-0.00911951	-0.0158697	-0.00882149	-0.010198	-0.0307113
0.3777	-0.0183955	-0.00873953	-0.00549108	-0.0147745	-0.0118092		0.3777	-0.0251457	-0.00794977	-0.0138506	-0.00723451	-0.00822358	-0.0282191
0.378117	-0.0183955	-0.00863522	-0.00689924	-0.0165179	-0.0136569		0.378117	-0.0237301	-0.00740588	-0.012219	-0.0063628	-0.0065472	-0.0239164
0.378533	-0.0178367	-0.00917167	-0.00784546	-0.0166968	-0.0136569		0.378533	-0.0240952	-0.0070259	-0.0112504	-0.00554323	-0.00516884	-0.0188649
0.37895	-0.0172034	-0.00979006	-0.00877678	-0.0152066	-0.0128075		0.37895	-0.0261813	-0.00660121	-0.0109822	-0.00497699	-0.00339001	-0.0147969
0.379367	-0.0165701	-0.0109226	-0.00938773	-0.0128895	-0.0117496		0.379367	-0.0288934	-0.00658631	-0.0121668	-0.00545382	-0.00130385	-0.0116788
0.379783	-0.0157356	-0.0127479	-0.00931323	-0.0107437	-0.0105426		0.379783	-0.0312552	-0.00666827	-0.0149459	-0.0070855	0.000568107	-0.00979006
0.3802	-0.0148639	-0.0138581	-0.00853092	-0.00931323	-0.00926852		0.3802	-0.0326261	-0.00623614	-0.0180081	-0.00876188	0.00206754	-0.00936538
0.380617	-0.0147671	-0.0133887	-0.00734627	-0.00875443	-0.00816584		0.380617	-0.0328422	-0.00498444	-0.0198483	-0.0090301	0.00282191	-0.0100471
0.381033	-0.0153333	-0.0122339	-0.0057593	-0.00882894	-0.0076741		0.381033	-0.0319853	-0.00360608	-0.0201389	-0.0083521	0.00206754	-0.0121146
0.38145	-0.0157654	-0.0112131	-0.00370294	-0.0090152	-0.00737608		0.38145	-0.0296384	-0.00280887	-0.0197515	-0.00803173	-8.3819e-05	-0.0148527
0.381867	-0.0158846	-0.0102818	-0.00245124	-0.00867993	-0.0064224		0.381867	-0.0263676	-0.00206381	-0.0186637	-0.00829995	-0.00350177	-0.0185072
0.382283	-0.0157282	-0.00918657	-0.00254065	-0.00777096	-0.00459701		0.382283	-0.0231937	-0.00166893	-0.0165254	-0.0083819	-0.00766479	-0.0223294
0.3827	-0.0149906	-0.00831485	-0.00339747	-0.00687689	-0.00289083		0.3827	-0.0206307	-0.00180304	-0.0137538	-0.00812113	-0.0120979	-0.0255816
0.383117	-0.0134557	-0.00828505	-0.00378489	-0.00683963	-0.00233948		0.383117	-0.0185817	-0.00231713	-0.0116602	-0.00860542	-0.0152178	-0.0280738
0.383533	-0.0118166	-0.00876933	-0.00301003	-0.00818074	-0.002563		0.383533	-0.0174865	-0.0025928	-0.0107437	-0.00994652	-0.0159908	-0.0288002
0.38395	-0.0105947	-0.00903755	-0.00172854	-0.0104755	-0.00301748		0.38395	-0.0178441	-0.00223517	-0.0108331	-0.0108555	-0.0152551	-0.0280961
0.384367	-0.00962615	-0.00886619	-0.000536442	-0.0126436	-0.00348687		0.384367	-0.0190437	-0.00201166	-0.0118986	-0.0106171	-0.0130478	-0.0263415
0.384783	-0.00869483	-0.00847131	-0.000149012	-0.0139251	-0.00413507		0.384783	-0.0198409	-0.0018552	-0.0133216	-0.00993162	-0.00972301	-0.0242069
0.3852	-0.00863522	-0.00818819	-0.000394881	-0.0145063	-0.00455231		0.3852	-0.0201911	-0.00192225	-0.0146329	-0.00917167	-0.00602566	-0.0222176
0.385617	-0.00984222	-0.00825524	-0.00077486	-0.0139996	-0.00389665		0.385617	-0.0209808	-0.00210851	-0.0151768	-0.00809133	-0.00356697	-0.0207089
0.386033	-0.0117496	-0.00815839	-0.00146776	-0.0123456	-0.00236929		0.386033	-0.0221506	-0.00230968	-0.0151619	-0.00642985	-0.00284053	-0.0205748
0.38645	-0.0140741	-0.00750273	-0.00274926	-0.00998378	-0.00025332		0.38645	-0.0232235	-0.00283122	-0.0150651	-0.00500679	-0.0026077	-0.0213012
0.386867	-0.0166446	-0.00638515	-0.00435859	-0.00804663	0.00176579		0.386867	-0.0238866	-0.00343472	-0.0145063	-0.00440329	-0.00227243	-0.0219159
0.387283	-0.0194535	-0.00519306	-0.00476092	-0.00721961	0.00312924		0.387283	-0.0247881	-0.00424683	-0.013873	-0.00424683	-0.00188127	-0.0221841
0.3877	-0.0215918	-0.0045076	-0.00352412	-0.00674278	0.00363588		0.3877	-0.0258163	-0.00489503	-0.0135973	-0.00454485	-0.0025332	-0.0221729
0.388117	-0.0225306	-0.00405312	-0.00181794	-0.00668317	0.00298023		0.388117	-0.026308	-0.00549108	-0.0137389	-0.00532717	-0.00433996	-0.0218488
0.388533	-0.0225604	-0.00408292	-0.000312924	-0.00675768	0.00163168		0.388533	-0.0263229	-0.0063777	-0.0141189	-0.00649691	-0.00655651	-0.0209212
0.38895	-0.0219271	-0.00480562	0.000976026	-0.00683963	4.47035e-05		0.38895	-0.0258908	-0.00700355	-0.0143722	-0.0071153	-0.00843778	-0.019569
0.389367	-0.0213906	-0.00558048	0.0019595	-0.00664592	-0.00163168		0.389367	-0.0248402	-0.00730157	-0.0147596	-0.00686199	-0.00962987	-0.0184625
0.389783	-0.0213534	-0.00584871	0.00186265	-0.00586361	-0.00298768		0.389783	-0.022918	-0.0071004	-0.0146627	-0.0063628	-0.0100769	-0.0181943
0.3902	-0.0215694	-0.00540912	0.000596046	-0.00484288	-0.00421703		0.3902	-0.0205189	-0.00694394	-0.0136718	-0.00603497	-0.00960194	-0.0185966
0.390617	-0.0215471	-0.00485778	-0.000908971	-0.00349432	-0.00523031		0.390617	-0.0179037	-0.00701845	-0.0125989	-0.00611693	-0.00867061	-0.0190213
0.391033	-0.020951	-0.00468642	-0.00236183	-0.002563	-0.00620633		0.391033	-0.0149533	-0.00723451	-0.0120029	-0.0064522	-0.0075344	-0.0190996
0.39145	-0.0200495	-0.00479072	-0.00353157	-0.00297278	-0.00751764		0.39145	-0.0126213	-0.00812858	-0.0120327	-0.00721216	-0.00632368	-0.0188984
0.391867	-0.0190735	-0.0051409	-0.00396371	-0.00473112	-0.00879169		0.391867	-0.0126511	-0.00935048	-0.0125542	-0.00816584	-0.00564381	-0.0184067
0.392283	-0.0179857	-0.00545382	-0.0039041	-0.00721216	-0.00988692		0.392283	-0.0153109	-0.0106692	-0.0140667	-0.00871718	-0.0062678	-0.0168197
0.3927	-0.0171363	-0.00528991	-0.00373274	-0.00943243	-0.0103489		0.3927	-0.0191405	-0.0118688	-0.016585	-0.00864267	-0.00766479	-0.0142716
0.393117	-0.0165179	-0.00476092	-0.00357628	-0.0110269	-0.0103265		0.393117	-0.0225753	-0.013046	-0.0190511	-0.0077486	-0.00853092	-0.0119805
0.393533	-0.0163764	-0.00420213	-0.00297278	-0.0121295	-0.00990182		0.393533	-0.0249371	-0.0139549	-0.0207797	-0.00671297	-0.00876374	-0.0102594
0.39395	-0.0169873	-0.00392646	-0.00178069	-0.0123456	-0.00905991		0.39395	-0.0260696	-0.013873	-0.0213459	-0.00630319	-0.00969507	-0.00925362
0.394367	-0.0175089	-0.0038892	-0.000678003	-0.0118986	-0.00797212		0.394367	-0.0257641	-0.0131503	-0.0209659	-0.00663847	-0.0115205	-0.00933185
0.394783	-0.0172406	-0.003919	6.70552e-05	-0.0109449	-0.00648946		0.394783	-0.0244603	-0.0126436	-0.0200719	-0.00728667	-0.0132527	-0.0111423
0.3952	-0.0162721	-0.00417233	0.000417233	-0.0104532	-0.00489503		0.3952	-0.0230968	-0.0123829	-0.0190884	-0.00783056	-0.0147149	-0.0135452
0.395617	-0.0159219	-0.00440329	0.000245869	-0.011012	-0.00376999		0.395617	-0.0223368	-0.0117347	-0.0183284	-0.00847131	-0.0160746	-0.0151657
0.396033	-0.0166297	-0.00452995	8.9407e-05	-0.0117347	-0.00399351		0.396033	-0.022687	-0.011079	-0.0179037	-0.00918657	-0.016652	-0.0162385
0.39645	-0.0173077	-0.00474602	4.47035e-05	-0.0121444	-0.00529736		0.39645	-0.0241697	-0.0112727	-0.0181794	-0.00911206	-0.0153575	-0.017222
0.396867	-0.0175312	-0.0051111	-0.000551343	-0.011757	-0.00654906		0.396867	-0.025928	-0.0121444	-0.0185817	-0.00799447	-0.0128429	-0.0175461
0.397283	-0.0179633	-0.00599772	-0.00233203	-0.0111759	-0.00727177		0.397283	-0.0269115	-0.0124425	-0.0181645	-0.00686944	-0.0104867	-0.0166073
0.3977	-0.0189766	-0.00778586	-0.00467897	-0.0103414	-0.00753254		0.3977	-0.0264496	-0.011526	-0.0167415	-0.0063926	-0.00875443	-0.0153892
0.398117	-0.019975	-0.0106469	-0.00627339	-0.00908226	-0.00716001		0.398117	-0.0250191	-0.0101179	-0.0150576	-0.00617653	-0.00714324	-0.0148751
0.398533	-0.020355	-0.0135601	-0.00739843	-0.00775605	-0.00547618		0.398533	-0.0232309	-0.00912696	-0.0136197	-0.00553578	-0.00599772	-0.0151433
0.39895	-0.0203401	-0.0151396	-0.00860542	-0.00651181	-0.00299513		0.39895	-0.0209361	-0.00869483	-0.0122935	-0.00513345	-0.00618398	-0.0155233
0.399367	-0.0205114	-0.0153482	-0.00915676	-0.00619143	-0.0012666		0.399367	-0.0188202	-0.008367	-0.0117123	-0.00585616	-0.00762753	-0.0159368
0.399783	-0.0206307	-0.0149384	-0.00794977	-0.00714511	-0.00119954		0.399783	-0.0177622	-0.00816584	-0.0125319	-0.00717491	-0.00922941	-0.0165068
0.4002	-0.0208542	-0.0144094	-0.00596046	-0.00907481	-0.00236183		0.4002	-0.0180379	-0.00904501	-0.0144169	-0.00852346	-0.0094343	-0.0178143
0.400617	-0.0214428	-0.0135303	-0.00528991	-0.0112653	-0.00404567		0.400617	-0.0189096	-0.0110716	-0.0161007	-0.00971556	-0.00848435	-0.0191107
0.401033	-0.0222772	-0.0121966	-0.00681728	-0.0132918	-0.00587106		0.401033	-0.019446	-0.0127405	-0.0166371	-0.0109076	-0.0076741	-0.019636
0.40145	-0.0230595	-0.0112057	-0.00934303	-0.0152215	-0.00729412		0.40145	-0.0198036	-0.0132024	-0.016354	-0.0113621	-0.00755303	-0.019446
0.401867	-0.0235736	-0.0112504	-0.0108927	-0.0164434	-0.00791252		0.401867	-0.0205487	-0.0134185	-0.0155941	-0.0104457	-0.00775792	-0.0191666
0.402283	-0.0240803	-0.0122711	-0.0109076	-0.0162274	-0.00766665		0.402283	-0.0219718	-0.0138953	-0.0146925	-0.00862032	-0.00800006	-0.0188202
0.4027	-0.0244975	-0.0133291	-0.00975281	-0.0148192	-0.00707805		0.4027	-0.0235438	-0.0138208	-0.0139102	-0.00669062	-0.00845641	-0.017155
0.403117	-0.0248551	-0.0141189	-0.0077486	-0.0131205	-0.00627339		0.403117	-0.0245348	-0.0130907	-0.0134557	-0.00525266	-0.00913627	-0.0147969
0.403533	-0.0251904	-0.0149533	-0.00528991	-0.0115559	-0.00582635		0.403533	-0.0247285	-0.0131577	-0.0136122	-0.00410527	-0.00907108	-0.0123829
0.40395	-0.0254661	-0.0156015	-0.00328571	-0.00999868	-0.00583381		0.40395	-0.0247508	-0.0142157	-0.0139549	-0.00356883	-0.00761822	-0.0102594
0.404367	-0.0256225	-0.0156164	-0.00280887	-0.00875443	-0.00570715		0.404367	-0.0241324	-0.0146627	-0.0140518	-0.00432879	-0.00533648	-0.00837073
0.404783	-0.0259802	-0.0151172	-0.00363588	-0.00877678	-0.00542402		0.404783	-0.0222772	-0.0142083	-0.0138655	-0.00655651	-0.00335276	-0.0067614
0.4052	-0.0270531	-0.0149235	-0.00458211	-0.0102147	-0.00523031		0.4052	-0.0202209	-0.0138804	-0.01394	-0.009574	-0.00227243	-0.0057891
0.405617	-0.0283495	-0.0146478	-0.00541657	-0.0121742	-0.00546873		0.405617	-0.0193939	-0.0144467	-0.0147074	-0.0123009	-0.00189058	-0.00556558
0.406033	-0.0290126	-0.0137314	-0.00626594	-0.013873	-0.00563264		0.406033	-0.020355	-0.0149757	-0.0155866	-0.0141412	-0.0026077	-0.00632554
0.40645	-0.0286698	-0.0128746	-0.00692159	-0.015296	-0.00540167		0.40645	-0.0216514	-0.0149533	-0.016354	-0.0148341	-0.00462867	-0.0080131
0.406867	-0.0277236	-0.0128448	-0.00716001	-0.0163168	-0.005126		0.406867	-0.0228211	-0.0147447	-0.0167564	-0.0142604	-0.00678934	-0.0104047
0.407283	-0.0262633	-0.0137091	-0.00733137	-0.016138	-0.00487268		0.407283	-0.0241697	-0.0143722	-0.016652	-0.0126138	-0.00786968	-0.0129752
0.4077	-0.0237525	-0.0143647	-0.00768155	-0.0145584	-0.00441819		0.4077	-0.0251159	-0.0136197	-0.0156611	-0.0107139	-0.00782311	-0.0156909
0.408117	-0.0208318	-0.0148639	-0.00778586	-0.0127032	-0.0038147		0.408117	-0.0252426	-0.0120401	-0.0139922	-0.00922382	-0.00675209	-0.0181496
0.408533	-0.0191182	-0.0155047	-0.00651926	-0.011459	-0.0031963		0.408533	-0.0244603	-0.0100806	-0.012435	-0.00859797	-0.00437722	-0.020273
0.40895	-0.0191852	-0.0158772	-0.00432134	-0.0102296	-0.00301748		0.40895	-0.0240356	-0.00853092	-0.0110045	-0.00894815	-0.00135973	-0.0217818
0.409367	-0.0196472	-0.0151768	-0.0025779	-0.00850111	-0.00374019		0.409367	-0.0239089	-0.00810623	-0.0101998	-0.0096932	0.000968575	-0.0215806
0.409783	-0.0194907	-0.0130609	-0.00201166	-0.00685453	-0.00498444		0.409783	-0.0235736	-0.00906736	-0.00997633	-0.0102818	0.00219792	-0.0204965
0.4102	-0.0193566	-0.0105649	-0.0025332	-0.00604242	-0.00641495		0.4102	-0.0232831	-0.0106245	-0.0102147	-0.00996143	0.00179745	-0.0194125
0.410617	-0.019528	-0.00874698	-0.00277907	-0.00584871	-0.00756234		0.410617	-0.0235215	-0.0116825	-0.0104904	-0.00866502	-0.000940636	-0.0189766
0.411033	-0.0188947	-0.00797212	-0.00290573	-0.00584126	-0.00804663		0.411033	-0.0244379	-0.0117868	-0.0107735	-0.00706315	-0.00565313	-0.0184178
0.41145	-0.0171512	-0.00777096	-0.00289083	-0.00603497	-0.00766665		0.41145	-0.024952	-0.0115484	-0.0114515	-0.00542402	-0.0102725	-0.0169314
0.411867	-0.0157952	-0.00794232	-0.00244379	-0.00614673	-0.00602007		0.411867	-0.0247285	-0.0115931	-0.0120029	-0.00382215	-0.013411	-0.0158362
0.412283	-0.0160858	-0.00803173	-0.00139326	-0.00587106	-0.00394136		0.412283	-0.0241175	-0.01169	-0.0124574	-0.00204146	-0.015432	-0.0154451
0.4127	-0.0175461	-0.00787526	0.000461936	-0.00540167	-0.00237674		0.4127	-0.0237152	-0.011459	-0.0134408	-0.000596046	-0.0157487	-0.0159033
0.413117	-0.0191554	-0.00684708	0.00204146	-0.00497699	-0.00199676		0.413117	-0.0231937	-0.011608	-0.0151768	0.00012666	-0.0134669	-0.016842
0.413533	-0.0209883	-0.00451505	0.00280142	-0.00476837	-0.00280142		0.413533	-0.0224188	-0.0126213	-0.0169724	0.000528991	-0.00976026	-0.017982
0.41395	-0.0227466	-0.00146776	0.00274181	-0.00526756	-0.0045374		0.41395	-0.0217408	-0.0137016	-0.018172	0.000819564	-0.00678934	-0.0197925
0.414367	-0.0236332	0.00131875	0.00209361	-0.00669062	-0.00748783		0.414367	-0.0215769	-0.0139177	-0.0190809	0.000722706	-0.00547618	-0.0212342
0.414783	-0.0234544	0.00261515	0.00115484	-0.00789762	-0.0111982		0.414783	-0.0218228	-0.0135899	-0.0196993	0	-0.00513159	-0.0220947
0.4152	-0.0229627	0.00271201	-0.000201166	-0.00777096	-0.0144243		0.4152	-0.0216812	-0.0138208	-0.019744	-0.000804663	-0.0053551	-0.0224411
0.415617	-0.0223145	0.00208616	-0.00176579	-0.00695139	-0.0162944		0.415617	-0.0213683	-0.0142604	-0.0193268	-0.00121444	-0.00709668	-0.0218488
0.416033	-0.0211671	0.000469387	-0.00295043	-0.00671297	-0.0170767		0.416033	-0.0209883	-0.0141487	-0.0189543	-0.00101328	-0.00965782	-0.0205971
0.41645	-0.0200868	-0.00228733	-0.00376999	-0.00695139	-0.0168383		0.41645	-0.0208467	-0.0139624	-0.0187978	-0.000350177	-0.0117347	-0.0184737
0.416867	-0.019975	-0.00569969	-0.0045225	-0.00698119	-0.015378		0.416867	-0.0209957	-0.0141785	-0.0184774	0.000573695	-0.0127777	-0.0169426
0.417283	-0.0206381	-0.00863522	-0.00506639	-0.00725687	-0.0133589		0.417283	-0.0214875	-0.0139698	-0.0181869	0.00181049	-0.0125542	-0.0163391
0.4177	-0.0208318	-0.0105873	-0.00554323	-0.00821799	-0.0118241		0.4177	-0.0223666	-0.012517	-0.018239	0.00292808	-0.0113714	-0.015948
0.418117	-0.0207052	-0.0120029	-0.00628084	-0.00929832	-0.0105426		0.418117	-0.0234097	-0.0109822	-0.0183284	0.00301748	-0.00930391	-0.0159703
0.418533	-0.0211447	-0.0129938	-0.00803173	-0.00917911	-0.00954419		0.418533	-0.024654	-0.0106916	-0.0182167	0.00147521	-0.00732951	-0.0169538
0.41895	-0.021778	-0.0134408	-0.00997633	-0.00825524	-0.00987202		0.41895	-0.0253245	-0.0106171	-0.017941	-0.000953674	-0.00642613	-0.0194237
0.419367	-0.0216663	-0.0129119	-0.0110418	-0.00800937	-0.0118092		0.419367	-0.0251159	-0.00973046	-0.0175536	-0.00317395	-0.0061281	-0.0216365
0.419783	-0.0209957	-0.0116676	-0.0114515	-0.00883639	-0.0134632		0.419783	-0.0242293	-0.00869483	-0.0165254	-0.00516325	-0.00634231	-0.0222735
0.4202	-0.0206828	-0.0103563	-0.0116229	-0.0102594	-0.013046		0.4202	-0.0233501	-0.00888854	-0.0148565	-0.00693649	-0.00764616	-0.0217594
0.420617	-0.0205487	-0.00876188	-0.0116602	-0.011526	-0.0119954		0.420617	-0.0230819	-0.0100285	-0.0138208	-0.00777096	-0.00940636	-0.0216477
0.421033	-0.0196397	-0.00660121	-0.0105947	-0.0128821	-0.0120327		0.421033	-0.0231266	-0.010699	-0.0140965	-0.0070557	-0.0100583	-0.0218041
0.42145	-0.0184923	-0.0039041	-0.0083074	-0.0137538	-0.0126064		0.42145	-0.0237375	-0.0109226	-0.0151247	-0.00535697	-0.0089407	-0.0209883
0.421867	-0.0181645	-0.00177324	-0.00541657	-0.0133663	-0.0123233		0.421867	-0.0246614	-0.0114739	-0.0166073	-0.00354648	-0.00721775	-0.0190102
0.422283	-0.0183731	-0.000841916	-0.0026226	-0.0124797	-0.0112802		0.422283	-0.0254288	-0.0128895	-0.0187159	-0.00187755	-0.00580214	-0.016585
0.4227	-0.0185817	-0.000923872	-0.000111759	-0.0118166	-0.0110492		0.4227	-0.0258908	-0.0143349	-0.020951	-0.000536442	-0.00407919	-0.0143051
0.423117	-0.019148	-0.00211597	0.00204146	-0.0108555	-0.011608		0.423117	-0.0261068	-0.0145733	-0.0219643	0.000149012	-0.00210479	-0.0118576
0.423533	-0.0204965	-0.00412762	0.00314415	-0.00872463	-0.0118241		0.423533	-0.0259355	-0.0141338	-0.0209808	-0.000283122	-0.000903383	-0.0100806
0.42395	-0.0219792	-0.00628829	0.00228733	-0.0063628	-0.0115186		0.42395	-0.0247881	-0.0140741	-0.0189096	-0.00163913	-0.00113621	-0.00948831
0.424367	-0.0228882	-0.00765175	-0.000417233	-0.00520796	-0.0109971		0.424367	-0.0228733	-0.0147074	-0.0168011	-0.00349432	-0.00269152	-0.0101812
0.424783	-0.023663	-0.00807643	-0.00391155	-0.00498444	-0.0106022		0.424783	-0.0211373	-0.0151545	-0.0151321	-0.00545382	-0.00541098	-0.0123158
0.4252	-0.0241995	-0.00816584	-0.00730157	-0.00447035	-0.0102669		0.4252	-0.0198558	-0.0149384	-0.0142679	-0.00760704	-0.00878237	-0.0154227
0.425617	-0.0238791	-0.00809878	-0.00999123	-0.00414252	-0.00990927		0.425617	-0.0188425	-0.0148118	-0.0141263	-0.0100508	-0.0118092	-0.0188649
0.426033	-0.0229254	-0.00781566	-0.0119358	-0.00464171	-0.00894815		0.426033	-0.0186116	-0.0148639	-0.0144318	-0.0120476	-0.0136998	-0.0208989
0.42645	-0.0218749	-0.00730902	-0.0127852	-0.00578165	-0.00739098		0.42645	-0.019908	-0.0144541	-0.0145957	-0.012897	-0.0142958	-0.0218377
0.426867	-0.0207946	-0.00657886	-0.0124499	-0.00670552	-0.00656396		0.426867	-0.0224039	-0.0129119	-0.0143573	-0.0127181	-0.0140071	-0.0224076
0.427283	-0.0189319	-0.00537932	-0.0104681	-0.00704825	-0.00748038		0.427283	-0.0248849	-0.0107959	-0.0140965	-0.0121817	-0.0125263	-0.0222288
0.4277	-0.0167713	-0.00385195	-0.00738353	-0.00789016	-0.00941753		0.4277	-0.0264868	-0.00935048	-0.0138953	-0.0112504	-0.0101794	-0.021413
0.428117	-0.0152141	-0.00233948	-0.00463426	-0.00942498	-0.0107959		0.428117	-0.0267252	-0.00918657	-0.0137016	-0.00964105	-0.00818632	-0.0204407
0.428533	-0.0144616	-0.000841916	-0.00307709	-0.0112206	-0.0120029		0.428533	-0.0254214	-0.00993162	-0.0136718	-0.00828505	-0.00771135	-0.0202954
0.42895	-0.0146478	0.000394881	-0.00257045	-0.0121891	-0.0133663		0.42895	-0.0233352	-0.0110343	-0.0143275	-0.00795722	-0.00795349	-0.0200942
0.429367	-0.0155568	0.000596046	-0.00241399	-0.0122935	-0.0139773		0.429367	-0.0215769	-0.0121146	-0.0157058	-0.00824034	-0.00742264	-0.0197701
0.429783	-0.0172481	-0.000990927	-0.00298023	-0.012666	-0.0131056		0.429783	-0.0206903	-0.0130832	-0.017561	-0.00824034	-0.00628643	-0.0204183
0.4302	-0.0191256	-0.00359863	-0.00450015	-0.0134259	-0.0111908		0.4302	-0.0203773	-0.0135601	-0.0190213	-0.00789762	-0.00512227	-0.0222512
0.430617	-0.0206009	-0.00550598	-0.00629574	-0.0138506	-0.00999123		0.430617	-0.0203922	-0.0131428	-0.0195205	-0.00779331	-0.00390224	-0.0241846
0.431033	-0.0218302	-0.00659376	-0.00698119	-0.013113	-0.00983477		0.431033	-0.0210851	-0.0123084	-0.019215	-0.00752509	-0.00215136	-0.0255145
0.43145	-0.0228956	-0.00755489	-0.00622124	-0.0118092	-0.010021		0.43145	-0.0218973	-0.0116974	-0.018537	-0.00714511	-0.00111759	-0.0265874
0.431867	-0.0238344	-0.00853836	-0.00452995	-0.011079	-0.00999868		0.431867	-0.0223368	-0.0121817	-0.0181794	-0.00756234	-0.00167638	-0.026945
0.432283	-0.0239909	-0.00873208	-0.00263006	-0.0106394	-0.00912696		0.432283	-0.0225976	-0.0135824	-0.0179484	-0.0090152	-0.00308268	-0.0264309
0.4327	-0.0231341	-0.00817329	-0.000573695	-0.00998378	-0.00774115		0.4327	-0.0233352	-0.0151023	-0.0177994	-0.0107437	-0.00483356	-0.0247657
0.433117	-0.0221953	-0.00832975	0.00138581	-0.00894815	-0.00619888		0.433117	-0.0245348	-0.0160038	-0.0179783	-0.011608	-0.00679865	-0.0221059
0.433533	-0.0218153	-0.00879914	0.00236183	-0.00843406	-0.00493973		0.433533	-0.0250936	-0.0159666	-0.0185892	-0.0115484	-0.00881031	-0.0187866
0.43395	-0.0220761	-0.00821054	0.00219792	-0.0089854	-0.00431389		0.43395	-0.0251085	-0.0156537	-0.0193194	-0.0112578	-0.00977889	-0.0162274
0.434367	-0.0226721	-0.00627339	0.000707805	-0.0095591	-0.00421703		0.434367	-0.0252575	-0.0152886	-0.0193492	-0.0106469	-0.0099279	-0.0160821
0.434783	-0.0239387	-0.00430644	-0.0018552	-0.00981241	-0.00493228		0.434783	-0.0253096	-0.0145808	-0.0186488	-0.0101104	-0.0105146	-0.0173897
0.4352	-0.0258237	-0.0031665	-0.00466406	-0.00954419	-0.00645965		0.4352	-0.0245571	-0.0132695	-0.0181347	-0.0101998	-0.0114739	-0.0184737
0.435617	-0.0272468	-0.00213087	-0.00682473	-0.00930578	-0.00852346		0.435617	-0.0235736	-0.0120848	-0.018321	-0.0114143	-0.0120327	-0.0186637
0.436033	-0.0273585	-0.00159442	-0.00771135	-0.00945479	-0.0104681		0.436033	-0.0233352	-0.0117347	-0.0190362	-0.0137538	-0.0114925	-0.0183508
0.43645	-0.025861	-0.00228733	-0.00742078	-0.00941753	-0.0116527		0.43645	-0.0231713	-0.0117347	-0.0198483	-0.0162721	-0.0101887	-0.0181943
0.436867	-0.0238419	-0.00403822	-0.0063777	-0.0089407	-0.0122264		0.436867	-0.0219792	-0.011459	-0.0203252	-0.018239	-0.00835396	-0.017859
0.437283	-0.0221729	-0.00578165	-0.00499189	-0.00758469	-0.0124723		0.437283	-0.020586	-0.0111386	-0.0197887	-0.0188351	-0.00583939	-0.017345
0.4377	-0.0211075	-0.00640005	-0.00394136	-0.00604242	-0.0121891		0.4377	-0.0206381	-0.0115037	-0.0179186	-0.0177026	-0.00311062	-0.0174902
0.438117	-0.0203103	-0.00562519	-0.00300258	-0.00516325	-0.0111163		0.438117	-0.0212565	-0.0114217	-0.0158623	-0.0151768	-0.000614673	-0.0192449
0.438533	-0.0194311	-0.00370294	-0.00173599	-0.00499934	-0.00996143		0.438533	-0.0213906	-0.00989437	-0.0147447	-0.0121072	0.000810251	-0.022687
0.43895	-0.0190213	-0.00168383	-0.000856817	-0.00517815	-0.00941008		0.43895	-0.0213087	-0.00772625	-0.0148416	-0.00908226	0.000977889	-0.0261292
0.439367	-0.0188947	-0.000588596	-0.00108778	-0.005126	-0.00949949		0.439367	-0.0218228	-0.00667572	-0.0157654	-0.0064075	0.000586733	-0.0282973
0.439783	-0.0185445	-2.98023e-05	-0.00219792	-0.00510365	-0.00999868		0.439783	-0.0225082	-0.0070557	-0.017494	-0.00422448	0.000493601	-0.028912
0.4402	-0.0181794	0.000327826	-0.00308454	-0.00558048	-0.0109822		0.4402	-0.0220239	-0.00762939	-0.0194162	-0.00244379	0.000521541	-0.0279956
0.440617	-0.0183359	0.000201166	-0.00348687	-0.00631809	-0.0119731		0.440617	-0.0212416	-0.00855327	-0.0203848	-0.00143051	-0.000270084	-0.0260286
0.441033	-0.0191778	-0.000610948	-0.00411272	-0.00698119	-0.012219		0.441033	-0.0209808	-0.0105724	-0.0201762	-0.00146776	-0.00164844	-0.0233129
0.44145	-0.0203028	-0.00154972	-0.00466406	-0.00756234	-0.0121221		0.44145	-0.0215694	-0.0131503	-0.0195578	-0.00265986	-0.00284053	-0.0201948
0.441867	-0.0212714	-0.00213087	-0.00392646	-0.00824779	-0.0122637		0.441867	-0.0225753	-0.0149757	-0.0196472	-0.00395626	-0.00393018	-0.0171773
0.442283	-0.0219047	-0.00292063	-0.00203401	-0.00888854	-0.0127554		0.442283	-0.0233874	-0.0157505	-0.0204071	-0.00474602	-0.00553206	-0.015568
0.4427	-0.02148	-0.00408292	-0.000327826	-0.00876933	-0.0131577		0.4427	-0.024274	-0.0161976	-0.0212342	-0.00572205	-0.00715256	-0.0160597
0.443117	-0.019975	-0.00548363	0.000603497	-0.00809133	-0.0135675		0.443117	-0.024803	-0.0164732	-0.0214726	-0.00717491	-0.00803731	-0.0177473
0.443533	-0.0180379	-0.00743568	0.00142306	-0.00749528	-0.0140071		0.443533	-0.0249892	-0.0162199	-0.0205114	-0.00862032	-0.00856817	-0.0196695
0.44395	-0.0161529	-0.0100434	0.00251085	-0.00723451	-0.0138953		0.44395	-0.024274	-0.0157356	-0.0184253	-0.00923872	-0.00951812	-0.0211224
0.444367	-0.0144169	-0.0124276	0.00312924	-0.00699609	-0.0135303		0.444367	-0.0225529	-0.0154302	-0.0159517	-0.00962615	-0.0104774	-0.0222288
0.444783	-0.0129789	-0.0136048	0.00328571	-0.00683218	-0.0135079		0.444783	-0.0207275	-0.0150055	-0.0141189	-0.0101253	-0.0108033	-0.0223406
0.4452	-0.0125393	-0.0136197	0.00362843	-0.00722706	-0.01394		0.4452	-0.0193641	-0.0141934	-0.0136495	-0.0104457	-0.0103377	-0.0215806
0.445617	-0.0130385	-0.0129268	0.00406802	-0.00782311	-0.0141636		0.445617	-0.0188947	-0.0136644	-0.0142753	-0.0103116	-0.00868924	-0.0204295
0.446033	-0.0140369	-0.0115708	0.00348687	-0.00804663	-0.0138879		0.446033	-0.0188798	-0.0141039	-0.0154004	-0.00928342	-0.00567175	-0.0193007
0.44645	-0.014931	-0.00994652	0.00171363	-0.00777841	-0.0132099		0.44645	-0.0193715	-0.015229	-0.0164807	-0.00756234	-0.00204891	-0.0191778
0.446867	-0.015676	-0.0082776	0.000335276	-0.00788271	-0.0121295		0.446867	-0.0208095	-0.0165477	-0.0171289	-0.0057295	0.000167638	-0.019636
0.447283	-0.0163764	-0.0064224	0.000543892	-0.00883639	-0.0107959		0.447283	-0.0230148	-0.0183359	-0.0170991	-0.00489503	0.000856817	-0.0202171
0.4477	-0.017494	-0.00448525	0.00181049	-0.0105351	-0.009574		0.4477	-0.0258759	-0.0206754	-0.0164434	-0.0051409	0.00028871	-0.0207536
0.448117	-0.0195056	-0.00299513	0.00289828	-0.0128672	-0.00932813		0.448117	-0.0286847	-0.022769	-0.0158995	-0.00567734	-0.00172295	-0.0211671
0.448533	-0.0217929	-0.00180304	0.00418723	-0.0148341	-0.0102147		0.448533	-0.0305548	-0.0239238	-0.0160187	-0.0063777	-0.00481494	-0.0208206
0.44895	-0.0233203	-0.000320375	0.00587851	-0.015974	-0.0116378		0.44895	-0.0311658	-0.024125	-0.0165477	-0.00706315	-0.00796281	-0.0193678
0.449367	-0.023663	0.000923872	0.00712275	-0.0162572	-0.0125617		0.449367	-0.0302568	-0.023663	-0.0164136	-0.00730902	-0.00922941	-0.0176467
0.449783	-0.0233054	0.00117719	0.00738353	-0.0159442	-0.0126958		0.449783	-0.0279918	-0.02224	-0.015378	-0.00701845	-0.00930391	-0.0170767
0.4502	-0.0224486	0.000275671	0.007011	-0.0153109	-0.0126809		0.4502	-0.0243708	-0.0204146	-0.0139624	-0.00624359	-0.00895932	-0.0167862
0.450617	-0.0207126	-0.0012815	0.00671297	-0.0137836	-0.012815		0.450617	-0.0201166	-0.0193492	-0.0127554	-0.00521541	-0.00840053	-0.0157356
0.451033	-0.0185445	-0.00376999	0.0063777	-0.0121668	-0.0131577		0.451033	-0.0167042	-0.0193417	-0.0124574	-0.00374019	-0.00791624	-0.014741
0.45145	-0.0173375	-0.00693649	0.00578165	-0.0113696	-0.0141934		0.45145	-0.0150427	-0.0199601	-0.0132993	-0.00286847	-0.00734814	-0.0147522
0.451867	-0.0175312	-0.0096485	0.00494719	-0.0117198	-0.016205		0.451867	-0.0152737	-0.0207126	-0.0149906	-0.00360608	-0.00720844	-0.0154562
0.452283	-0.0184178	-0.0115708	0.0038147	-0.0120401	-0.0184998		0.452283	-0.0169575	-0.0220314	-0.0161827	-0.00539422	-0.00705011	-0.0151098
0.4527	-0.019379	-0.012733	0.00242889	-0.0111982	-0.0198781		0.4527	-0.0195056	-0.0231937	-0.0164807	-0.0076443	-0.00653788	-0.0138581
0.453117	-0.0204593	-0.0133291	0.00163913	-0.00999868	-0.0198483		0.453117	-0.0221953	-0.0228956	-0.0164434	-0.00970811	-0.00594184	-0.0133216
0.453533	-0.0214279	-0.0131428	0.00240654	-0.0089407	-0.0189319		0.453533	-0.0242069	-0.0212044	-0.0162795	-0.0117049	-0.00568107	-0.0140928
0.45395	-0.0217184	-0.012435	0.00471622	-0.00815093	-0.0176057		0.45395	-0.0251681	-0.0191405	-0.0154898	-0.0133216	-0.0059884	-0.0150986
0.454367	-0.0218675	-0.0118017	0.00784546	-0.00756979	-0.0162125		0.454367	-0.0247732	-0.017494	-0.0141189	-0.0139549	-0.00622124	-0.0157803
0.454783	-0.0227913	-0.0112057	0.0102893	-0.00756979	-0.0148118		0.454783	-0.0230968	-0.0162795	-0.0136495	-0.0136718	-0.00601634	-0.0167638
0.4552	-0.0237823	-0.0106618	0.0117794	-0.00759959	-0.0136048		0.4552	-0.0208393	-0.0156313	-0.0145063	-0.0127777	-0.0059139	-0.0185743
0.455617	-0.0234246	-0.0104755	0.0122637	-0.0070706	-0.0128075		0.455617	-0.0189692	-0.0158772	-0.0159517	-0.0121742	-0.00595115	-0.0208654
0.456033	-0.0221655	-0.0105947	0.0115633	-0.00682473	-0.0120252		0.456033	-0.0182688	-0.0163764	-0.0168905	-0.0121966	-0.0057742	-0.0227317
0.45645	-0.0213757	-0.0104904	0.0104308	-0.0070408	-0.0108406		0.45645	-0.0180751	-0.0162274	-0.0168085	-0.0123382	-0.00501052	-0.0239722
0.456867	-0.0207275	-0.00975281	0.00932068	-0.00695139	-0.00949204		0.456867	-0.0179633	-0.0152439	-0.0160336	-0.0123233	-0.00433996	-0.0244975
0.457283	-0.0191852	-0.00876933	0.00899285	-0.00599027	-0.00900775		0.457283	-0.0181869	-0.0139773	-0.0148863	-0.0122264	-0.00454485	-0.0244863
0.4577	-0.0167489	-0.00808388	0.00877678	-0.00528991	-0.00971556		0.4577	-0.0188276	-0.0133589	-0.0141412	-0.0119135	-0.00567175	-0.0241399
0.458117	-0.0148267	-0.00753254	0.00802428	-0.00555813	-0.0108406		0.458117	-0.0193566	-0.0137091	-0.0137761	-0.0110716	-0.00734814	-0.0235476
0.458533	-0.0140294	-0.00673533	0.00676513	-0.00602007	-0.0119954		0.458533	-0.0193268	-0.0148267	-0.013575	-0.00974536	-0.00881962	-0.0233017
0.45895	-0.0139028	-0.00627339	0.00496209	-0.00597537	-0.0134185		0.45895	-0.0194311	-0.0161305	-0.0140071	-0.00872463	-0.00993721	-0.0237711
0.459367	-0.0144616	-0.00625104	0.00298023	-0.00546873	-0.0153035		0.459367	-0.0202507	-0.0165254	-0.0155419	-0.00847131	-0.0106543	-0.0245199
0.459783	-0.0152811	-0.00616163	0.000953674	-0.00504404	-0.0167862		0.459783	-0.0210032	-0.0153035	-0.0178739	-0.00847131	-0.010794	-0.0242516
0.4602	-0.0164136	-0.00551343	-0.000633299	-0.00500679	-0.0172481		0.4602	-0.0209287	-0.0126809	-0.0198185	-0.00847876	-0.00975095	-0.0224635
0.460617	-0.0176504	-0.00462681	-0.00155717	-0.00534207	-0.0170395		0.460617	-0.0206307	-0.00970066	-0.020884	-0.00873953	-0.00762753	-0.0197031
0.461033	-0.0184923	-0.0044778	-0.00209361	-0.00563264	-0.0172853		0.461033	-0.0207126	-0.00779331	-0.0216216	-0.00923127	-0.00533648	-0.0165962
0.46145	-0.0184178	-0.00455231	-0.0025481	-0.00575185	-0.0184029		0.46145	-0.0213459	-0.00742823	-0.0223145	-0.00931323	-0.00369735	-0.0139475
0.461867	-0.0170693	-0.00488758	-0.00306964	-0.00626594	-0.0192001		0.461867	-0.0216588	-0.00811368	-0.0228137	-0.00848621	-0.00263564	-0.0127293
0.462283	-0.0152364	-0.00553578	-0.0038296	-0.00772625	-0.0193343		0.462283	-0.021264	-0.00874698	-0.0230521	-0.00747293	-0.00153668	-0.0136122
0.4627	-0.0135973	-0.00675023	-0.00461936	-0.00986457	-0.0194162		0.4627	-0.0207201	-0.00872463	-0.0230968	-0.00700355	-0.000186265	-0.0158474
0.463117	-0.0123754	-0.00824779	-0.0050962	-0.011757	-0.0200346		0.463117	-0.0197887	-0.00807643	-0.0234097	-0.00720471	0.000968575	-0.0184178
0.463533	-0.011459	-0.009574	-0.00481307	-0.0129566	-0.0199899		0.463533	-0.0182465	-0.00679493	-0.0237823	-0.00759959	0.00129454	-0.0205189
0.46395	-0.0112206	-0.0110045	-0.00386685	-0.0137389	-0.0182763		0.46395	-0.016354	-0.00557303	-0.0238121	-0.00800192	0.00110827	-0.0213906
0.464367	-0.0119954	-0.0121519	-0.00311434	-0.0142977	-0.0161678		0.464367	-0.0155568	-0.0057742	-0.0235438	-0.00852346	0.000484288	-0.0204854
0.464783	-0.0130609	-0.0125468	-0.00263751	-0.014618	-0.0147671		0.464783	-0.0165254	-0.00771135	-0.0229925	-0.00935048	-0.00118278	-0.018429
0.4652	-0.0136048	-0.0115782	-0.00169128	-0.0144318	-0.0138283		0.4652	-0.0181347	-0.0104308	-0.022307	-0.0103191	-0.00397675	-0.016842
0.465617	-0.0135377	-0.00949949	0.000216067	-0.0137016	-0.0123754		0.465617	-0.0193864	-0.012517	-0.0209957	-0.010848	-0.00649132	-0.0160262
0.466033	-0.0136569	-0.00686944	0.00216067	-0.0126958	-0.0108555		0.466033	-0.0201762	-0.0132099	-0.019297	-0.0108778	-0.00736676	-0.0155903
0.46645	-0.0137165	-0.00409782	0.00263006	-0.0118688	-0.0100732		0.46645	-0.020355	-0.0123233	-0.0183657	-0.0106767	-0.00706874	-0.0157356
0.466867	-0.0133887	-0.00157207	0.00172108	-0.0113919	-0.00980496		0.466867	-0.019379	-0.0107661	-0.0183657	-0.0104755	-0.00597909	-0.0172891
0.467283	-0.0133961	9.68575e-05	0.000804663	-0.0108257	-0.00977516		0.467283	-0.0179932	-0.00999868	-0.0187904	-0.00993162	-0.00367872	-0.0191331
0.4677	-0.0146851	0.000305474	0.000298023	-0.00954419	-0.00976771		0.4677	-0.0170544	-0.0101253	-0.0191182	-0.00908226	-0.000875443	-0.0195801
0.468117	-0.0169352	-0.000856817	-0.000201166	-0.00783801	-0.00968576		0.468117	-0.0169948	-0.0102744	-0.0194982	-0.00816584	0.000735745	-0.0186972
0.468533	-0.0186712	-0.00241399	-0.000536442	-0.00703335	-0.00916421		0.468533	-0.017263	-0.0106618	-0.0202432	-0.00756234	0.000828877	-0.0181273
0.46895	-0.0198856	-0.00388175	-0.000208616	-0.00724196	-0.00841916		0.46895	-0.0172034	-0.0122711	-0.0212118	-0.00732392	0.000251457	-0.0183955
0.469367	-0.0211447	-0.00549853	0.000678003	-0.00777096	-0.00766665		0.469367	-0.0165999	-0.0139251	-0.0220463	-0.0077039	-0.000474975	-0.0183508
0.469783	-0.022307	-0.00733137	0.00105798	-0.00791252	-0.00682473		0.469783	-0.0149384	-0.0143647	-0.0224784	-0.00903755	-0.00188127	-0.0183955
0.4702	-0.0228286	-0.00912696	0.000588596	-0.00794232	-0.00599027		0.4702	-0.0131354	-0.0141338	-0.0224859	-0.0110865	-0.00339001	-0.0192225
0.470617	-0.0228062	-0.0107288	-0.000812113	-0.00818074	-0.00590831		0.470617	-0.0121295	-0.0149161	-0.0225306	-0.0134707	-0.00386499	-0.0207424
0.471033	-0.0226498	-0.0123754	-0.00282377	-0.00781566	-0.00660866		0.471033	-0.0121891	-0.0165179	-0.0229627	-0.0152811	-0.00369735	-0.0215136
0.47145	-0.0222996	-0.0132695	-0.00447035	-0.00675768	-0.00723451		0.47145	-0.0132769	-0.0171289	-0.0232086	-0.0158995	-0.00383705	-0.0203289
0.471867	-0.0219494	-0.0129938	-0.00496209	-0.00538677	-0.0076443		0.471867	-0.0153929	-0.0167415	-0.0228733	-0.0151619	-0.00454485	-0.0177696
0.472283	-0.021778	-0.0122115	-0.00421703	-0.00417978	-0.00799447		0.472283	-0.0183359	-0.0159889	-0.0225678	-0.0133812	-0.0045076	-0.014808
0.4727	-0.0218228	-0.0117645	-0.00303239	-0.00311434	-0.00859052		0.4727	-0.0208691	-0.0151843	-0.0233874	-0.0109598	-0.00371598	-0.0126399
0.473117	-0.0217482	-0.0113323	-0.0019744	-0.00251085	-0.00919402		0.473117	-0.0222847	-0.0139102	-0.0253841	-0.00824779	-0.00363216	-0.0112876
0.473533	-0.0216514	-0.0103861	-0.00162423	-0.00283122	-0.00974536		0.473533	-0.0229701	-0.0123605	-0.0273287	-0.00583381	-0.00439584	-0.010673
0.47395	-0.0215322	-0.010021	-0.00219792	-0.00382215	-0.010483		0.47395	-0.0231639	-0.0113621	-0.0286028	-0.00432879	-0.00501052	-0.0112094
0.474367	-0.0209585	-0.01093	-0.00340492	-0.00457466	-0.0112504		0.474367	-0.0226721	-0.0108331	-0.0295639	-0.00351667	-0.00506639	-0.0128634
0.474783	-0.0201017	-0.012055	-0.00438839	-0.00471622	-0.0119656		0.474783	-0.0217408	-0.0106394	-0.0301301	-0.00286102	-0.00584871	-0.0149645
0.4752	-0.0192001	-0.0117719	-0.00476837	-0.00486523	-0.0122115		0.4752	-0.0210181	-0.0108555	-0.0295788	-0.0025779	-0.00712462	-0.0165962
0.475617	-0.0184029	-0.0103042	-0.00458211	-0.00520796	-0.0116676		0.475617	-0.0207499	-0.0118092	-0.0282004	-0.00300258	-0.00735745	-0.0179373
0.476033	-0.0174344	-0.00897795	-0.00409037	-0.00597537	-0.0108033		0.476033	-0.0203252	-0.0128895	-0.0272766	-0.00438094	-0.00647269	-0.0190102
0.47645	-0.0165701	-0.00769645	-0.00353903	-0.00700355	-0.0103042		0.47645	-0.0194833	-0.0132844	-0.0273362	-0.00599772	-0.00515953	-0.0190325
0.476867	-0.0165105	-0.00604242	-0.00273436	-0.0083074	-0.0101998		0.476867	-0.0186861	-0.0135452	-0.0277013	-0.00734627	-0.00358559	-0.0182278
0.477283	-0.0174642	-0.00463426	-0.00186265	-0.00962615	-0.00979751		0.477283	-0.0181422	-0.0142157	-0.0280738	-0.00832975	-0.00161119	-0.017859
0.4777	-0.0187233	-0.00471622	-0.000998378	-0.0107288	-0.00889599		0.4777	-0.0182092	-0.0151768	-0.0289753	-0.00863522	-8.3819e-05	-0.0179037
0.478117	-0.0194311	-0.00600517	-0.000432134	-0.0115708	-0.00756234		0.478117	-0.0186488	-0.0156164	-0.029847	-0.00844151	0.000586733	-0.0172444
0.478533	-0.019893	-0.00713766	-0.000104308	-0.0115782	-0.00613183		0.478533	-0.019215	-0.0153333	-0.0295117	-0.0083521	0.00083819	-0.0157803
0.47895	-0.0203922	-0.00787526	0.000275671	-0.0107065	-0.00473112		0.47895	-0.019975	-0.0148341	-0.0281632	-0.00882894	0.000745058	-0.014931
0.479367	-0.0206232	-0.00843406	0.000551343	-0.00931323	-0.0037998		0.479367	-0.0207722	-0.0139475	-0.0274703	-0.00989437	-5.58794e-05	-0.0154339
0.479783	-0.0201091	-0.00847876	0.000439584	-0.00806898	-0.00373274		0.479783	-0.0215396	-0.0125393	-0.0277087	-0.0106692	-0.00133179	-0.0160709
0.4802	-0.0195503	-0.00777841	-0.00026077	-0.00723451	-0.00402331		0.4802	-0.0216439	-0.0108033	-0.0277236	-0.0111163	-0.00227243	-0.0165515
0.480617	-0.019595	-0.00665337	-0.00128895	-0.00651926	-0.00470132		0.480617	-0.0213683	-0.00911206	-0.027135	-0.0114962	-0.00305474	-0.016965
0.481033	-0.0197515	-0.00587106	-0.00201911	-0.00648946	-0.00598282		0.481033	-0.0217482	-0.00791997	-0.0268668	-0.011228	-0.00385567	-0.016965
0.48145	-0.0197291	-0.0057742	-0.00252575	-0.00753999	-0.0077188		0.48145	-0.0227392	-0.00724942	-0.0271648	-0.0104308	-0.00425614	-0.016015
0.481867	-0.0195131	-0.00613928	-0.00295788	-0.0090301	-0.00907481		0.481867	-0.0236109	-0.00728667	-0.0268742	-0.00959635	-0.00375323	-0.013724
0.482283	-0.0189021	-0.00683963	-0.00330061	-0.0103265	-0.00965595		0.482283	-0.0238642	-0.00808388	-0.0263453	-0.00993162	-0.00220724	-0.0112094
0.4827	-0.0173226	-0.00727922	-0.00320375	-0.0109449	-0.0107214		0.4827	-0.0237077	-0.00942498	-0.0266805	-0.0111088	-0.000940636	-0.0096336
0.483117	-0.0154674	-0.00746548	-0.00279397	-0.0107959	-0.0127256		0.483117	-0.0232831	-0.0112429	-0.0281557	-0.0120327	-0.000847504	-0.0100806
0.483533	-0.0147671	-0.00777841	-0.00240654	-0.00914931	-0.0145584		0.483533	-0.0221804	-0.0136867	-0.0296459	-0.0130758	-0.00198372	-0.0120699
0.48395	-0.0148267	-0.00815839	-0.00222027	-0.00589341	-0.0155047		0.48395	-0.0208393	-0.0164658	-0.0297353	-0.0146255	-0.0037346	-0.0143498
0.484367	-0.0145733	-0.0083819	-0.00232458	-0.00248104	-0.0162497		0.484367	-0.0200123	-0.0187457	-0.0287294	-0.0159964	-0.00569969	-0.0168756
0.484783	-0.0140592	-0.00809133	-0.00233948	-6.70552e-05	-0.0171512		0.484783	-0.0199899	-0.0198707	-0.0272021	-0.0161901	-0.00822358	-0.0194013
0.4852	-0.0142232	-0.0076443	-0.00219047	0.000834465	-0.017181		0.4852	-0.0203028	-0.0195131	-0.0255108	-0.0153258	-0.0101514	-0.0215806
0.485617	-0.0150427	-0.00737608	-0.0012964	0.000432134	-0.0157654		0.485617	-0.0203997	-0.0183731	-0.0236928	-0.0144616	-0.0102073	-0.0226647
0.486033	-0.0151843	-0.00747293	-0.000119209	-0.000879169	-0.0139996		0.486033	-0.0206456	-0.016652	-0.0219494	-0.0134185	-0.00904314	-0.0225753
0.48645	-0.0150204	-0.00786781	0.000827014	-0.00250339	-0.0128001		0.48645	-0.0212118	-0.0144243	-0.021629	-0.0118837	-0.00860542	-0.02205
0.486867	-0.0152364	-0.00847876	0.00149757	-0.00409037	-0.0116378		0.486867	-0.0221208	-0.0122935	-0.0228658	-0.01055	-0.0095088	-0.0216141
0.487283	-0.0156686	-0.00916421	0.00156462	-0.00538677	-0.0104904		0.487283	-0.0230223	-0.0109524	-0.0244826	-0.0100955	-0.0106357	-0.0218041
0.4877	-0.0155494	-0.00946969	0.00108778	-0.00619143	-0.00987202		0.4877	-0.0237077	-0.01131	-0.0253096	-0.0109226	-0.0116974	-0.0218153
0.488117	-0.0143424	-0.00920892	-0.000439584	-0.0063777	-0.01017		0.488117	-0.0241995	-0.0125095	-0.02525	-0.0123233	-0.0131782	-0.0210777
0.488533	-0.0133663	-0.00812858	-0.00211597	-0.00619143	-0.0108704		0.488533	-0.0241026	-0.0131726	-0.02525	-0.0136644	-0.0145566	-0.020653
0.48895	-0.0129342	-0.00650436	-0.00265241	-0.00627339	-0.011079		0.48895	-0.0235513	-0.0128597	-0.0255704	-0.0147074	-0.0149664	-0.0214465
0.489367	-0.0133067	-0.00521541	-0.00199676	-0.00679493	-0.011161		0.489367	-0.0228435	-0.0116602	-0.0260621	-0.0156164	-0.0145659	-0.0223629
0.489783	-0.0145882	-0.00496954	-0.000812113	-0.00782311	-0.0117496		0.489783	-0.0224486	-0.00998378	-0.0268891	-0.0161454	-0.0140071	-0.0219159
0.4902	-0.0164434	-0.00584871	-0.000163913	-0.00885874	-0.0129044		0.4902	-0.0230148	-0.00807643	-0.0282004	-0.0154451	-0.0135042	-0.0206754
0.490617	-0.0184253	-0.00718236	0.000409782	-0.00961125	-0.0138283		0.490617	-0.0245348	-0.00650436	-0.0299662	-0.0139624	-0.012992	-0.0199825
0.491033	-0.0193268	-0.0083521	0.00116229	-0.00993908	-0.0139922		0.491033	-0.0262335	-0.00602752	-0.0317991	-0.0129119	-0.012219	-0.0203624
0.49145	-0.019379	-0.00911206	0.00144541	-0.00975281	-0.0142902		0.49145	-0.027433	-0.00677258	-0.0330433	-0.0126734	-0.0106357	-0.0209101
0.491867	-0.0191852	-0.00936538	0.00120699	-0.00915676	-0.0149086		0.491867	-0.0277981	-0.00800937	-0.0335574	-0.0123978	-0.00864267	-0.0215024
0.492283	-0.0187382	-0.00938773	0.000551343	-0.00827014	-0.0148192		0.492283	-0.027366	-0.00879169	-0.0335798	-0.0122637	-0.00729226	-0.0221729
0.4927	-0.0183284	-0.00985712	0.000566244	-0.00768155	-0.0136942		0.4927	-0.0261664	-0.00844896	-0.0331402	-0.0129491	-0.00672415	-0.0228211
0.493117	-0.0185966	-0.0107288	0.000976026	-0.00745058	-0.012584		0.493117	-0.0243261	-0.00771135	-0.0318065	-0.0136048	-0.00629574	-0.0229999
0.493533	-0.0199154	-0.0112206	0.000931323	-0.00786781	-0.0123605		0.493533	-0.0226945	-0.00742823	-0.0294968	-0.0129268	-0.00609085	-0.02224
0.49395	-0.0211895	-0.0109896	0.000365078	-0.00905991	-0.012368		0.49395	-0.0215024	-0.00739843	-0.026986	-0.0112429	-0.00682659	-0.0217706
0.494367	-0.0211075	-0.0105053	-0.000700355	-0.0105649	-0.0123233		0.494367	-0.0201091	-0.00722706	-0.0249743	-0.00995398	-0.00822358	-0.02243
0.494783	-0.0202507	-0.010781	-0.00139326	-0.0117719	-0.0127479		0.494783	-0.0185147	-0.00699609	-0.0234693	-0.00956654	-0.00902452	-0.0242516
0.4952	-0.0198185	-0.0116751	-0.00172854	-0.0119507	-0.0135526		0.4952	-0.0173375	-0.00760704	-0.0220537	-0.00955164	-0.00900589	-0.0263862
0.495617	-0.0199676	-0.012219	-0.00178069	-0.0113919	-0.0139102		0.495617	-0.0171065	-0.00844151	-0.0210851	-0.00971556	-0.00851229	-0.0291578
0.496033	-0.0201166	-0.0125021	-0.00155717	-0.0101924	-0.0134781		0.496033	-0.0175089	-0.00876188	-0.0204816	-0.0104532	-0.00768341	-0.03241
0.49645	-0.0200644	-0.0124946	-0.00131875	-0.00835955	-0.012815		0.49645	-0.0180006	-0.00894815	-0.019908	-0.0116155	-0.00689179	-0.0348017
0.496867	-0.0203848	-0.0118092	-0.00117719	-0.00625104	-0.0123084		0.496867	-0.0186265	-0.0096634	-0.0192299	-0.0129715	-0.00608154	-0.0356734
0.497283	-0.0209361	-0.00970066	-0.00146776	-0.00423193	-0.0120923		0.497283	-0.0191033	-0.0109002	-0.0186488	-0.0136569	-0.00590459	-0.0353046
0.4977	-0.0207052	-0.00659376	-0.00202656	-0.00300258	-0.0120476		0.4977	-0.0189096	-0.0116527	-0.0191703	-0.0131652	-0.00661239	-0.0348687
0.498117	-0.0189543	-0.00435114	-0.00232458	-0.00295788	-0.0118539		0.498117	-0.0182018	-0.0117421	-0.0210628	-0.0121817	-0.00771135	-0.03355
0.498533	-0.0164956	-0.00394881	-0.00229478	-0.00394136	-0.0112951		0.498533	-0.017032	-0.01131	-0.023745	-0.0115037	-0.00878237	-0.0316277
0.49895	-0.0144839	-0.00510365	-0.00210106	-0.00552088	-0.0106022		0.49895	-0.0154302	-0.0105873	-0.0262335	-0.011228	-0.00895932	-0.0301078
0.499367	-0.0129268	-0.00687689	-0.00200421	-0.00706315	-0.00999123		0.499367	-0.0143051	-0.0102371	-0.0279322	-0.0103861	-0.00857748	-0.0295155
0.499783	-0.0118092	-0.00853836	-0.00166893	-0.00862032	-0.00920892		0.499783	-0.0145137	-0.01017	-0.0289306	-0.00912696	-0.0077486	-0.030186
0.5002	-0.0115931	-0.00973046	-0.00110269	-0.0101477	-0.00870228		0.5002	-0.015974	-0.00999868	-0.0290647	-0.00849366	-0.00666827	-0.0311136
0.500617	-0.0130758	-0.00973791	-0.000745058	-0.0110492	-0.00935793		0.500617	-0.017032	-0.0096485	-0.0281632	-0.00885874	-0.00610016	-0.0323206
0.501033	-0.0157207	-0.00804663	-0.000610948	-0.0112206	-0.0109375		0.501033	-0.0170544	-0.00942498	-0.0267029	-0.00939518	-0.00609085	-0.0331029
0.50145	-0.0187829	-0.00573695	-0.000268221	-0.0111088	-0.0122711		0.50145	-0.0171587	-0.00931323	-0.025332	-0.00941008	-0.00589527	-0.032723
0.501867	-0.0219718	-0.00423938	0.000424683	-0.0113845	-0.0123531		0.501867	-0.0175089	-0.00853092	-0.0242814	-0.00920892	-0.00540167	-0.0314377
0.502283	-0.024505	-0.00394881	0.000618398	-0.0114515	-0.0114888		0.502283	-0.0175685	-0.00756234	-0.0231937	-0.00912696	-0.00532717	-0.0294149
0.5027	-0.0254512	-0.00376254	0.000163913	-0.0105575	-0.0100732		0.5027	-0.017181	-0.00712275	-0.0219345	-0.00928342	-0.00576489	-0.0278279
0.503117	-0.0247955	-0.00354648	-0.000581145	-0.00932068	-0.00816584		0.503117	-0.017561	-0.0070259	-0.0206009	-0.00952929	-0.00620261	-0.026945
0.503533	-0.0232905	-0.00418723	-0.0018552	-0.00842661	-0.00627339		0.503533	-0.0196248	-0.00671297	-0.0194982	-0.0100508	-0.00637025	-0.0269115
0.50395	-0.0210702	-0.005804	-0.00400841	-0.00783056	-0.00493973		0.50395	-0.0225604	-0.0063926	-0.0187904	-0.0107363	-0.00758097	-0.0283085
0.504367	-0.018172	-0.00762939	-0.00610948	-0.00699609	-0.00429153		0.504367	-0.0255033	-0.00683963	-0.0181198	-0.0113249	-0.0100397	-0.0313036
0.504783	-0.0153854	-0.00916421	-0.00713766	-0.00622124	-0.00417978		0.504783	-0.0277534	-0.00748038	-0.0172555	-0.0115931	-0.0126194	-0.0349581
0.5052	-0.0134483	-0.0109747	-0.00724196	-0.0063479	-0.00450015		0.5052	-0.0288784	-0.00782311	-0.0163019	-0.0111982	-0.0143889	-0.0373051
0.505617	-0.0122562	-0.0129938	-0.00709295	-0.00750273	-0.00533462		0.505617	-0.0284687	-0.00810623	-0.0160635	-0.0102744	-0.0150595	-0.038255
0.506033	-0.011079	-0.0142604	-0.00673533	-0.0096485	-0.00613183		0.506033	-0.0266135	-0.00866502	-0.0165403	-0.00935048	-0.0151526	-0.038825
0.50645	-0.00992417	-0.0142157	-0.00595301	-0.0121221	-0.00682473		0.50645	-0.0242665	-0.00938028	-0.0170246	-0.00882149	-0.0148267	-0.0387579
0.506867	-0.00905991	-0.0134557	-0.00505894	-0.0135079	-0.00824034		0.506867	-0.0221431	-0.00950694	-0.0172853	-0.00902265	-0.0137184	-0.0372715
0.507283	-0.00814349	-0.0131801	-0.00396371	-0.0130534	-0.010781		0.507283	-0.0204742	-0.00871718	-0.0176728	-0.00987202	-0.0117999	-0.0353158
0.5077	-0.00755489	-0.0137165	-0.00291318	-0.0112727	-0.0135526		0.5077	-0.0189021	-0.00742078	-0.0183657	-0.0112504	-0.00927597	-0.034254
0.508117	-0.00753999	-0.014402	-0.00212342	-0.00937283	-0.0150874		0.508117	-0.0175014	-0.00626594	-0.0191778	-0.0125021	-0.00685453	-0.0335723
0.508533	-0.00879169	-0.0145882	-0.00152737	-0.00726432	-0.0154451		0.508533	-0.0169873	-0.00561774	-0.0200644	-0.0127181	-0.00513159	-0.0323653
0.50895	-0.0111163	-0.0138134	-0.000923872	-0.00464916	-0.0151992		0.50895	-0.0176653	-0.00531972	-0.0207275	-0.0122041	-0.00407919	-0.0310242
0.509367	-0.0133738	-0.0120848	-0.000633299	-0.00267476	-0.0145808		0.509367	-0.0190288	-0.00526011	-0.0208616	-0.0114441	-0.00367872	-0.0304431
0.509783	-0.0152141	-0.00907481	-0.00136346	-0.00219047	-0.0132918		0.509783	-0.0196695	-0.00569969	-0.0206158	-0.010632	-0.00328757	-0.0307113
0.5102	-0.0163242	-0.00529736	-0.00245124	-0.00299513	-0.0120774		0.5102	-0.0192001	-0.00654161	-0.0204295	-0.00939518	-0.00308268	-0.0309236
0.510617	-0.0171363	-0.00216812	-0.00335276	-0.003919	-0.0121966		0.510617	-0.0183433	-0.00751018	-0.0202656	-0.00755489	-0.00358559	-0.0309683
0.511033	-0.0177696	-0.000990927	-0.00406802	-0.00461191	-0.0132471		0.511033	-0.0177473	-0.008367	-0.0198632	-0.00603497	-0.00410713	-0.0305437
0.51145	-0.0175908	-0.00235438	-0.00478327	-0.00534952	-0.0139773		0.51145	-0.0173151	-0.00871718	-0.0197291	-0.00543892	-0.00337139	-0.0292808
0.511867	-0.017032	-0.00526011	-0.00490248	-0.00615418	-0.0134185		0.511867	-0.0165254	-0.00844151	-0.0203624	-0.00558793	-0.00138767	-0.0269674
0.512283	-0.016652	-0.00883639	-0.00414252	-0.00731647	-0.012219		0.512283	-0.0162572	-0.00843406	-0.021182	-0.00606477	-0.000353903	-0.0233017
0.5127	-0.0167638	-0.0120625	-0.00347942	-0.00815093	-0.0112429		0.5127	-0.0175312	-0.00908971	-0.02186	-0.00664592	-0.000949949	-0.0195466
0.513117	-0.0168234	-0.0144541	-0.00335276	-0.00818074	-0.0105128		0.513117	-0.0201762	-0.00971556	-0.0222251	-0.00755489	-0.0019744	-0.0168867
0.513533	-0.0163242	-0.0157803	-0.00356883	-0.00756234	-0.01017		0.513533	-0.0225455	-0.00991672	-0.0224411	-0.00876188	-0.0031013	-0.0161491
0.51395	-0.0162646	-0.0154227	-0.00378489	-0.0070408	-0.0106692		0.51395	-0.023447	-0.010334	-0.0227913	-0.00993162	-0.00490807	-0.0167973
0.514367	-0.0168681	-0.0136867	-0.00429898	-0.00680983	-0.011757		0.514367	-0.0232458	-0.0113174	-0.0232011	-0.0108108	-0.00759028	-0.0177138
0.514783	-0.0179559	-0.0114515	-0.0051707	-0.00642985	-0.0128523		0.514783	-0.0229105	-0.012286	-0.0240132	-0.0112802	-0.00973232	-0.0185408
0.5152	-0.0194907	-0.00947714	-0.00575185	-0.00628084	-0.0130162		0.5152	-0.0231788	-0.0125393	-0.0248328	-0.0113845	-0.0108872	-0.0192449
0.515617	-0.0211	-0.00784546	-0.00557303	-0.00648946	-0.0124872		0.515617	-0.0235364	-0.0122637	-0.0251085	-0.0112802	-0.0111014	-0.0198036
0.516033	-0.0222698	-0.00648946	-0.00491738	-0.0070408	-0.0122339		0.516033	-0.0235438	-0.0116527	-0.0247359	-0.0111535	-0.0102166	-0.0194907
0.51645	-0.0227541	-0.00573695	-0.00405312	-0.00779331	-0.0120997		0.51645	-0.0231639	-0.0105575	-0.0237599	-0.0113025	-0.00911765	-0.0186302
0.516867	-0.0230148	-0.005804	-0.00303239	-0.00876188	-0.0118762		0.516867	-0.0227839	-0.00908226	-0.0230148	-0.0114739	-0.00814907	-0.0178814
0.517283	-0.0230223	-0.00657141	-0.00169128	-0.00978261	-0.011079		0.517283	-0.0221655	-0.00673533	-0.0229105	-0.0112131	-0.0076741	-0.0178926
0.5177	-0.0224411	-0.00800937	-0.000163913	-0.0102893	-0.0101998		0.5177	-0.0203848	-0.00428408	-0.0228211	-0.0107437	-0.00745058	-0.0191331
0.518117	-0.0222176	-0.00961125	0.000812113	-0.0103936	-0.00942498		0.518117	-0.0178814	-0.00274926	-0.0221133	-0.0103638	-0.00808388	-0.0217371
0.518533	-0.0228882	-0.0110269	0.00102818	-0.0105128	-0.00838935		0.518533	-0.0161901	-0.00245869	-0.0207201	-0.0100359	-0.00995584	-0.0256263
0.51895	-0.0236481	-0.0121295	0.000298023	-0.0104085	-0.00779331		0.51895	-0.016287	-0.00281632	-0.0192747	-0.00941008	-0.0116415	-0.0294596
0.519367	-0.0234097	-0.0129268	-0.00146031	-0.00981987	-0.00851601		0.519367	-0.0171885	-0.00359118	-0.0182092	-0.00861287	-0.012368	-0.0321865
0.519783	-0.0224337	-0.013113	-0.00373274	-0.00882894	-0.0107214		0.519783	-0.0175387	-0.00531226	-0.0174046	-0.0083074	-0.0125915	-0.0334941
0.5202	-0.0216961	-0.0123158	-0.00591576	-0.00811368	-0.0130385		0.5202	-0.0173524	-0.0070855	-0.0170246	-0.00822544	-0.0130013	-0.0336617
0.520617	-0.0206605	-0.0104234	-0.00718236	-0.00786036	-0.0142381		0.520617	-0.0172779	-0.00742823	-0.0173226	-0.0083819	-0.0133552	-0.0331476
0.521033	-0.0187159	-0.00736862	-0.00725687	-0.00753254	-0.0140741		0.521033	-0.017032	-0.00594556	-0.0183582	-0.00850856	-0.0131689	-0.0323653
0.52145	-0.0160187	-0.00403822	-0.00661612	-0.00694394	-0.0129566		0.52145	-0.015676	-0.00366569	-0.0199601	-0.00847876	-0.0124238	-0.0319295
0.521867	-0.0139922	-0.00124425	-0.00549108	-0.00599027	-0.0111908		0.521867	-0.0136122	-0.00165403	-0.0211075	-0.0083521	-0.0107754	-0.0320412
0.522283	-0.0137091	0.000365078	-0.00460446	-0.00508875	-0.00929087		0.522283	-0.012286	-0.000312924	-0.0207573	-0.00810623	-0.00795349	-0.0322983
0.5227	-0.0144765	0.00117719	-0.004448	-0.00427663	-0.00762939		0.5227	-0.0124946	0.000104308	-0.0190735	-0.00826269	-0.00512227	-0.0321306
0.523117	-0.0152513	0.00113249	-0.00516325	-0.00372529	-0.00635535		0.523117	-0.0128448	-0.000536442	-0.0175238	-0.00869483	-0.00340864	-0.030756
0.523533	-0.0160038	-0.000104308	-0.00613183	-0.00403822	-0.00559539		0.523533	-0.0125915	-0.00223517	-0.017181	-0.00911951	-0.00309199	-0.0284538
0.52395	-0.0176877	-0.00178069	-0.00613928	-0.00537187	-0.00493228		0.52395	-0.0124872	-0.00513345	-0.0173077	-0.0090152	-0.00368804	-0.0259615
0.524367	-0.0196248	-0.00306964	-0.0050962	-0.00724196	-0.00443309		0.524367	-0.0136271	-0.00844151	-0.017345	-0.00874698	-0.00519678	-0.0243858
0.524783	-0.0203401	-0.00352412	-0.00361353	-0.00821054	-0.00374764		0.524783	-0.015609	-0.0109226	-0.0176355	-0.00915676	-0.00733882	-0.0242516
0.5252	-0.0195131	-0.0038743	-0.00271946	-0.00789762	-0.00344962		0.5252	-0.0170097	-0.0120923	-0.018619	-0.010103	-0.00881962	-0.024654
0.525617	-0.018388	-0.00436604	-0.00298768	-0.00686199	-0.00432879		0.525617	-0.0182167	-0.0125021	-0.0196993	-0.0106767	-0.0088755	-0.025291
0.526033	-0.0175908	-0.0044927	-0.00435859	-0.00517815	-0.00649691		0.526033	-0.0193045	-0.0127852	-0.020057	-0.0105053	-0.00773929	-0.0259057
0.52645	-0.0164211	-0.0039041	-0.00582635	-0.003241	-0.00922382		0.52645	-0.0198334	-0.012435	-0.0203252	-0.0102147	-0.00665896	-0.026755
0.526867	-0.0151768	-0.00311434	-0.00658631	-0.0018552	-0.0112131		0.526867	-0.018917	-0.0111163	-0.0209063	-0.0096485	-0.006482	-0.0273809
0.527283	-0.0145435	-0.00263751	-0.00683218	-0.00181794	-0.0122488		0.527283	-0.0171438	-0.00948459	-0.0218302	-0.00815839	-0.00727363	-0.027325
0.5277	-0.0148043	-0.002563	-0.0063777	-0.00306964	-0.0126436		0.5277	-0.0161454	-0.00823289	-0.0227913	-0.0064671	-0.00868924	-0.0267439
0.528117	-0.0155494	-0.00268966	-0.00526011	-0.00499934	-0.012666		0.528117	-0.0163168	-0.00753999	-0.0234619	-0.00579655	-0.0096485	-0.0255927
0.528533	-0.0163317	-0.00342727	-0.00331551	-0.00748783	-0.0121221		0.528533	-0.0172555	-0.00707805	-0.0241175	-0.00625104	-0.0096485	-0.0246093
0.52895	-0.0170916	-0.0051558	-0.00172854	-0.00991672	-0.0113696		0.52895	-0.0186786	-0.00719726	-0.0242442	-0.00680238	-0.00867993	-0.0244528
0.529367	-0.0174344	-0.00695884	-0.00175834	-0.011526	-0.0109896		0.529367	-0.0206381	-0.00815839	-0.0238493	-0.0071153	-0.0075344	-0.0254139
0.529783	-0.0172704	-0.00788271	-0.00317395	-0.0123084	-0.0112876		0.529783	-0.0227168	-0.00976771	-0.0229329	-0.00751018	-0.0065472	-0.0265874
0.5302	-0.0172332	-0.00806153	-0.0051111	-0.0123307	-0.0123084		0.5302	-0.0239834	-0.0116676	-0.0213012	-0.00758469	-0.0057742	-0.0276491
0.530617	-0.0179633	-0.00872463	-0.00617653	-0.0118315	-0.013873		0.530617	-0.023894	-0.0132248	-0.0193268	-0.00672042	-0.00572763	-0.0293814
0.531033	-0.0190213	-0.0101775	-0.00700355	-0.010781	-0.015825		0.531033	-0.0233054	-0.0140145	-0.0168309	-0.00507384	-0.00678003	-0.031583
0.53145	-0.0196174	-0.0118166	-0.0082776	-0.00949949	-0.0171885		0.53145	-0.0227764	-0.0132918	-0.01432	-0.0039041	-0.00883825	-0.0324994
0.531867	-0.0198036	-0.0131205	-0.00943243	-0.00856072	-0.0173226		0.531867	-0.0224337	-0.0114739	-0.0124425	-0.00363588	-0.01112	-0.0309013
0.532283	-0.0197589	-0.0137389	-0.00952184	-0.00816584	-0.0166669		0.532283	-0.022158	-0.00955164	-0.0121742	-0.00406802	-0.0135601	-0.0286102
0.5327	-0.0192523	-0.0131354	-0.00844896	-0.00862777	-0.0160262		0.5327	-0.0226125	-0.00793487	-0.0139773	-0.00473857	-0.0160933	-0.0272915
0.533117	-0.0176579	-0.010848	-0.00728667	-0.00936538	-0.0155047		0.533117	-0.023976	-0.00658631	-0.0170544	-0.00546873	-0.0184868	-0.0267327
0.533533	-0.0161156	-0.00748038	-0.00592321	-0.00979751	-0.0143349		0.533533	-0.0253096	-0.00540167	-0.020273	-0.00621378	-0.0202283	-0.026118
0.53395	-0.0159517	-0.00421703	-0.00400841	-0.00952184	-0.0127554		0.53395	-0.0257343	-0.00507384	-0.0227988	-0.00642985	-0.0213459	-0.0262745
0.534367	-0.0170618	-0.00210106	-0.00219047	-0.00863522	-0.0118762		0.534367	-0.0252053	-0.00596791	-0.0247061	-0.0064373	-0.021616	-0.0285096
0.534783	-0.0185072	-0.00118464	-0.00168383	-0.00786036	-0.0120252		0.534783	-0.0242516	-0.00744313	-0.0263751	-0.00655651	-0.0206102	-0.0317842
0.5352	-0.0196174	-0.0013262	-0.00248849	-0.00742823	-0.012055		0.5352	-0.0226423	-0.00923127	-0.027433	-0.00663102	-0.0183471	-0.0347458
0.535617	-0.0207871	-0.00245869	-0.00361353	-0.00727922	-0.0113025		0.535617	-0.0208169	-0.0114143	-0.0275001	-0.00631064	-0.0152551	-0.0370033
0.536033	-0.0217631	-0.00416488	-0.00493973	-0.00701845	-0.0106171		0.536033	-0.0195876	-0.0137985	-0.0269189	-0.00542402	-0.0126008	-0.0383332
0.53645	-0.0224933	-0.00533462	-0.00676513	-0.00699609	-0.0106022		0.53645	-0.0195876	-0.0155866	-0.0259578	-0.00441819	-0.0101328	-0.0387914
0.536867	-0.0230446	-0.0050813	-0.00855327	-0.00774115	-0.0107512		0.536867	-0.0199229	-0.0162423	-0.0241101	-0.00359863	-0.00780448	-0.0386126
0.537283	-0.0237599	-0.00391155	-0.00928342	-0.00856072	-0.0103936		0.537283	-0.0197291	-0.0162274	-0.0206456	-0.00240654	-0.00565313	-0.0375733
0.5377	-0.0247508	-0.00291318	-0.00903755	-0.00841916	-0.0101775		0.5377	-0.0194013	-0.015527	-0.0167713	-0.00146776	-0.00453554	-0.0351146
0.538117	-0.0258461	-0.00297278	-0.00860542	-0.00733882	-0.0105724		0.538117	-0.0191629	-0.0143051	-0.0139847	-0.00189245	-0.00540167	-0.0312142
0.538533	-0.0270605	-0.00391155	-0.00809133	-0.00656396	-0.0109598		0.538533	-0.0188425	-0.0132918	-0.0128299	-0.00385195	-0.0077486	-0.0276379
0.53895	-0.0280142	-0.0051409	-0.00726432	-0.00653416	-0.0108257		0.53895	-0.0182614	-0.0131801	-0.0128597	-0.00602752	-0.011269	-0.0256598
0.539367	-0.028722	-0.00633299	-0.00675023	-0.00638515	-0.0101775		0.539367	-0.0183061	-0.0140145	-0.0140667	-0.00698864	-0.0146311	-0.0250004
0.539783	-0.0288859	-0.00713021	-0.00743568	-0.00587851	-0.00940263		0.539783	-0.0189543	-0.014931	-0.0162646	-0.00756234	-0.016978	-0.0246763
0.5402	-0.0279471	-0.00707805	-0.00896305	-0.00564009	-0.00846386		0.5402	-0.0192225	-0.0158921	-0.018239	-0.00808388	-0.0174996	-0.024464
0.540617	-0.0258088	-0.00552833	-0.0102893	-0.005804	-0.00727177		0.540617	-0.0191629	-0.0168309	-0.0192374	-0.00789762	-0.0161026	-0.0243075
0.541033	-0.023067	-0.00276416	-0.0110939	-0.00629574	-0.0057742		0.541033	-0.019908	-0.0175759	-0.0192299	-0.00695139	-0.0136904	-0.024084
0.54145	-0.020735	-7.45058e-06	-0.0117719	-0.00697374	-0.00470132		0.54145	-0.0213981	-0.0181049	-0.0188351	-0.00657886	-0.0114925	-0.0232011
0.541867	-0.0193939	0.00137836	-0.012368	-0.00794232	-0.00488758		0.541867	-0.0224411	-0.017859	-0.0180677	-0.00750273	-0.0104029	-0.0210218
0.542283	-0.0190809	0.00119209	-0.0124127	-0.00864267	-0.00644475		0.542283	-0.0228062	-0.017345	-0.0171587	-0.00858307	-0.00983477	-0.0188425
0.5427	-0.0195876	0.000208616	-0.0117794	-0.00865758	-0.0083521		0.5427	-0.0232905	-0.0169203	-0.0167042	-0.00866502	-0.00930391	-0.0175796
0.543117	-0.0202432	-0.000715256	-0.0110939	-0.00847876	-0.00959635		0.543117	-0.0239834	-0.0168234	-0.0164807	-0.00814349	-0.00878237	-0.0180043
0.543533	-0.0202954	-0.00121444	-0.0105798	-0.00821054	-0.0106245		0.543533	-0.0238121	-0.0167266	-0.0160336	-0.00748783	-0.00823289	-0.0191107
0.54395	-0.0191107	-0.00153482	-0.00975281	-0.00789762	-0.0113621		0.54395	-0.0230446	-0.0161305	-0.0149608	-0.00622869	-0.0073947	-0.0195801
0.544367	-0.0168979	-0.00137836	-0.00816584	-0.00777096	-0.0115708		0.544367	-0.0228807	-0.015609	-0.0135899	-0.00432879	-0.00664033	-0.0196919
0.544783	-0.0146553	-0.00109523	-0.00628084	-0.00860542	-0.0111237		0.544783	-0.0236854	-0.0149831	-0.0122413	-0.00265986	-0.00703148	-0.0199378
0.5452	-0.0135079	-0.000812113	-0.00514835	-0.0101924	-0.0101849		0.5452	-0.0246838	-0.0137985	-0.0112578	-0.00240654	-0.00839122	-0.0213571
0.545617	-0.0135079	-0.000342727	-0.00485033	-0.0113472	-0.00915676		0.545617	-0.0244379	-0.0118166	-0.0112578	-0.00301003	-0.00981614	-0.0235364
0.546033	-0.0143126	-5.96046e-05	-0.00532717	-0.0117198	-0.00825524		0.546033	-0.0230297	-0.00980496	-0.0122339	-0.00361353	-0.010822	-0.0259168
0.54645	-0.0158399	-0.000111759	-0.00627339	-0.0116378	-0.00814349		0.54645	-0.0210404	-0.00882894	-0.0140071	-0.00421703	-0.0110548	-0.0286773
0.546867	-0.0176728	-0.00077486	-0.00759959	-0.0117272	-0.00872463		0.546867	-0.0190884	-0.00886619	-0.016205	-0.00555813	-0.0105053	-0.0313148
0.547283	-0.0189766	-0.00146776	-0.00896305	-0.011988	-0.00891834		0.547283	-0.0175461	-0.00956654	-0.0187829	-0.00810623	-0.00917353	-0.0323988
0.5477	-0.0191927	-0.00192225	-0.00951439	-0.0122041	-0.00844151		0.5477	-0.0166819	-0.0102594	-0.0210479	-0.0107288	-0.00810251	-0.0305437
0.548117	-0.0188723	-0.00274926	-0.00935793	-0.0126064	-0.00815093		0.548117	-0.0171289	-0.0111759	-0.0217929	-0.0127405	-0.00728294	-0.0265092
0.548533	-0.0187084	-0.00359118	-0.00894815	-0.0133142	-0.00847131		0.548533	-0.0181571	-0.0122264	-0.0208169	-0.0140443	-0.00625849	-0.0222735
0.54895	-0.018537	-0.0038892	-0.00896305	-0.0143051	-0.00867248		0.54895	-0.0189021	-0.0129342	-0.018999	-0.0146329	-0.00554137	-0.0187531
0.549367	-0.0182688	-0.00347197	-0.00910461	-0.0149161	-0.00825524		0.549367	-0.0193268	-0.0128895	-0.01733	-0.0143275	-0.00583008	-0.0160038
0.549783	-0.01809	-0.00266731	-0.00870228	-0.0147372	-0.00850856		0.549783	-0.0201985	-0.0125468	-0.0154823	-0.0127107	-0.00720844	-0.0154562
0.5502	-0.0180975	-0.00255555	-0.00788271	-0.0144169	-0.010252		0.5502	-0.0209063	-0.0132546	-0.0137538	-0.0106096	-0.00839122	-0.0178926
0.550617	-0.0181869	-0.00342727	-0.00695884	-0.014551	-0.0123978		0.550617	-0.0204667	-0.0152439	-0.0129119	-0.00922382	-0.00933185	-0.0216477
0.551033	-0.0175759	-0.00465661	-0.00600517	-0.0145435	-0.0137389		0.551033	-0.0199303	-0.0180304	-0.0134856	-0.00867248	-0.010021	-0.024341
0.55145	-0.0163093	-0.00590831	-0.00484288	-0.0132918	-0.0143796		0.55145	-0.0206456	-0.0204071	-0.0149831	-0.00852346	-0.0100862	-0.0252128
0.551867	-0.0146776	-0.00687689	-0.00352412	-0.0111088	-0.0149086		0.551867	-0.0225082	-0.0217929	-0.0160635	-0.00821799	-0.00904314	-0.0252686
0.552283	-0.0133589	-0.00751018	-0.00245124	-0.00891089	-0.0148341		0.552283	-0.0233278	-0.0222325	-0.0162572	-0.00805408	-0.00679865	-0.0244975
0.5527	-0.0126883	-0.00743568	-0.00207126	-0.00696629	-0.0136644		0.5527	-0.0230968	-0.0215843	-0.0153333	-0.00817329	-0.00448898	-0.0223406
0.553117	-0.0120029	-0.00673533	-0.00190735	-0.00507384	-0.0121817		0.553117	-0.0228733	-0.0198036	-0.0139102	-0.00807643	-0.00321306	-0.0198707
0.553533	-0.0114813	-0.00657141	-0.0012964	-0.00333041	-0.0114888		0.553533	-0.0228807	-0.0170618	-0.0121072	-0.00791252	-0.00385567	-0.0184178
0.55395	-0.0114292	-0.00713021	-0.000275671	-0.00229478	-0.0118837		0.55395	-0.0227168	-0.0143349	-0.0103414	-0.00800937	-0.00604428	-0.0183173
0.554367	-0.012137	-0.00769645	0.000357628	-0.00182539	-0.0121668		0.554367	-0.022158	-0.0122115	-0.00965595	-0.00841171	-0.0089407	-0.0192449
0.554783	-0.0133738	-0.00812858	-0.00012666	-0.00174344	-0.0115111		0.554783	-0.0226051	-0.0102296	-0.010699	-0.00820309	-0.0126753	-0.0207201
0.5552	-0.0147447	-0.00842661	-0.00116229	-0.00239164	-0.0106022		0.5552	-0.0244305	-0.00853836	-0.0131577	-0.00675023	-0.0174344	-0.0224076
0.555617	-0.0163838	-0.00850856	-0.00283122	-0.00408292	-0.0102445		0.555617	-0.0271499	-0.00775605	-0.0160113	-0.00473112	-0.0222772	-0.0231229
0.556033	-0.0177845	-0.00804663	-0.00527501	-0.00660121	-0.0103563		0.556033	-0.0293031	-0.00821054	-0.0188053	-0.00304729	-0.0257045	-0.0230446
0.55645	-0.0183657	-0.00685453	-0.00762194	-0.00882149	-0.00995398		0.55645	-0.0299811	-0.00952929	-0.020504	-0.00209361	-0.026729	-0.0237599
0.556867	-0.0178441	-0.00532717	-0.00870973	-0.00986457	-0.00929832		0.556867	-0.0292957	-0.0114292	-0.0203028	-0.00189245	-0.026226	-0.0258163
0.557283	-0.0168085	-0.00347197	-0.00791997	-0.0096187	-0.00930578		0.557283	-0.0274852	-0.0139624	-0.0187233	-0.00248104	-0.0251643	-0.028342
0.5577	-0.0161678	-0.0018552	-0.00649691	-0.00824034	-0.00982732		0.5577	-0.0248179	-0.0162497	-0.0167489	-0.0037998	-0.0232365	-0.0300519
0.558117	-0.015825	-0.000990927	-0.00537932	-0.00620633	-0.0102669		0.558117	-0.0214577	-0.0172332	-0.014931	-0.00496954	-0.0203308	-0.0314601
0.558533	-0.0161231	-0.000737607	-0.00473857	-0.00467151	-0.0104159		0.558533	-0.018388	-0.0167266	-0.0135675	-0.0057444	-0.0173319	-0.0325441
0.55895	-0.0173002	-0.000722706	-0.00464916	-0.00470132	-0.0106394		0.55895	-0.0159368	-0.0154004	-0.0134557	-0.0064671	-0.0153016	-0.0324324
0.559367	-0.0191852	-0.00137091	-0.005126	-0.00613928	-0.0112653		0.559367	-0.0142232	-0.0140294	-0.0147596	-0.00699609	-0.0136532	-0.0305548
0.559783	-0.0201911	-0.00284612	-0.00624359	-0.00797957	-0.0123456		0.559783	-0.0133216	-0.0129193	-0.0163019	-0.00723451	-0.0114832	-0.0282079
0.5602	-0.0194833	-0.00425428	-0.00713766	-0.00968576	-0.013791		0.5602	-0.0134557	-0.0122264	-0.0171661	-0.00721961	-0.0094343	-0.0276044
0.560617	-0.0187457	-0.00473857	-0.0070557	-0.0112876	-0.0149608		0.560617	-0.0145137	-0.011839	-0.0170842	-0.00749528	-0.00836328	-0.0285991
0.561033	-0.0192896	-0.00441819	-0.0057444	-0.0122488	-0.0150725		0.561033	-0.0161082	-0.0117421	-0.0163168	-0.00786781	-0.00786036	-0.0297055
0.56145	-0.0210553	-0.0044778	-0.00404567	-0.0121146	-0.0147		0.56145	-0.0183284	-0.0117496	-0.0154898	-0.00786036	-0.00780448	-0.0294708
0.561867	-0.0229701	-0.00469387	-0.00261515	-0.011459	-0.0145137		0.561867	-0.0209212	-0.011988	-0.0148937	-0.00788271	-0.0084471	-0.0283644
0.562283	-0.0247732	-0.0044927	-0.00152737	-0.0111088	-0.0142828		0.562283	-0.0231564	-0.0125617	-0.0147671	-0.00851601	-0.00988133	-0.0273138
0.5627	-0.0262335	-0.00377744	-0.00122189	-0.0113547	-0.0135154		0.5627	-0.024505	-0.0131503	-0.0148267	-0.00929832	-0.01112	-0.0261739
0.563117	-0.0262484	-0.00309944	-0.00189245	-0.0114813	-0.0122041		0.563117	-0.0255331	-0.0137463	-0.0151619	-0.00968576	-0.0116136	-0.0248775
0.563533	-0.0246614	-0.00286102	-0.00391155	-0.0111014	-0.011459		0.563533	-0.0266358	-0.0144243	-0.0160187	-0.00993162	-0.0121538	-0.0243299
0.56395	-0.0225008	-0.00292808	-0.00652671	-0.0103861	-0.0113025		0.56395	-0.0272691	-0.0153929	-0.0166446	-0.010401	-0.0127591	-0.0251681
0.564367	-0.0207797	-0.0032112	-0.00914186	-0.009574	-0.0111759		0.564367	-0.0270158	-0.0163242	-0.0167862	-0.0109226	-0.0132341	-0.0263192
0.564783	-0.019975	-0.00394881	-0.0112951	-0.00889599	-0.0111237		0.564783	-0.0262335	-0.016816	-0.0163093	-0.0108033	-0.0134762	-0.0260957
0.5652	-0.0203475	-0.00503659	-0.0122115	-0.00813603	-0.0117123		0.5652	-0.025548	-0.0172779	-0.0159666	-0.0108704	-0.0140164	-0.0244081
0.565617	-0.0222474	-0.00603497	-0.0116453	-0.00707805	-0.0133887		0.565617	-0.0247434	-0.0178963	-0.0162274	-0.0117123	-0.0151899	-0.0227094
0.566033	-0.0248477	-0.00656396	-0.00984967	-0.00587106	-0.0153854		0.566033	-0.0235736	-0.017792	-0.0164211	-0.0127703	-0.0160001	-0.0211783
0.56645	-0.0264719	-0.00628084	-0.0076741	-0.00495464	-0.0169128		0.56645	-0.0225678	-0.0164732	-0.0165328	-0.0134483	-0.0159722	-0.0201389
0.566867	-0.0269189	-0.00548363	-0.00576675	-0.00487268	-0.0174195		0.566867	-0.0223741	-0.0145882	-0.016585	-0.013791	-0.0154413	-0.0206083
0.567283	-0.0273511	-0.00444055	-0.00412762	-0.00564754	-0.0166893		0.567283	-0.0231042	-0.0133291	-0.0172481	-0.0141039	-0.0147056	-0.0229329
0.5677	-0.0280812	-0.00335276	-0.00303984	-0.00661612	-0.0149384		0.5677	-0.024125	-0.0128895	-0.0180081	-0.0134856	-0.0136252	-0.0261292
0.568117	-0.0278428	-0.00198185	-0.00286847	-0.00734627	-0.0126287		0.568117	-0.0245124	-0.0126511	-0.0180751	-0.0119805	-0.0114832	-0.028275
0.568533	-0.0265539	-0.000543892	-0.00359118	-0.00783056	-0.010848		0.568533	-0.0237897	-0.0128523	-0.0181049	-0.0106096	-0.00916421	-0.0296384
0.56895	-0.0256225	0.000201166	-0.00476092	-0.00842661	-0.00981987		0.56895	-0.0226721	-0.0138506	-0.0184551	-0.0100061	-0.00799075	-0.0304654
0.569367	-0.0256672	0.00025332	-0.00548363	-0.00926852	-0.00949204		0.569367	-0.0215918	-0.014998	-0.0185743	-0.00949949	-0.0078883	-0.0295043
0.569783	-0.0256225	0.000342727	-0.00596046	-0.00993162	-0.00987202		0.569783	-0.0200123	-0.0153035	-0.0172481	-0.00863522	-0.00841916	-0.0262633
0.5702	-0.0249073	0.00025332	-0.00667572	-0.0105053	-0.0107437		0.5702	-0.017792	-0.014849	-0.0152215	-0.00815839	-0.00877306	-0.0218488
0.570617	-0.0243187	-0.000737607	-0.00741333	-0.011161	-0.0117123		0.570617	-0.0161678	-0.0144616	-0.0138059	-0.00834465	-0.00900589	-0.0187531
0.571033	-0.0239909	-0.0019595	-0.00750273	-0.0116453	-0.01169		0.571033	-0.0162944	-0.0139549	-0.0131577	-0.00878423	-0.00903383	-0.0169426
0.57145	-0.0233203	-0.00220537	-0.00631064	-0.0112951	-0.0108778		0.57145	-0.0173897	-0.0125915	-0.0131503	-0.00889599	-0.00872649	-0.014741
0.571867	-0.0220016	-0.00136346	-0.00472367	-0.0102445	-0.0101477		0.571867	-0.0186414	-0.0108704	-0.0141263	-0.00867993	-0.00823289	-0.0125393
0.572283	-0.0208169	-0.000841916	-0.0038296	-0.009574	-0.0100732		0.572283	-0.0199527	-0.00988692	-0.0161901	-0.00862777	-0.00757165	-0.0118129
0.5727	-0.0203699	-0.000707805	-0.00368059	-0.00988692	-0.00996888		0.5727	-0.0211	-0.009574	-0.0185296	-0.00920147	-0.00729226	-0.0129752
0.573117	-0.0205562	-0.000320375	-0.00376999	-0.0109822	-0.0096485		0.573117	-0.0216067	-0.009574	-0.0207499	-0.0104457	-0.00784174	-0.0143833
0.573533	-0.0209957	0.000484288	-0.00365824	-0.0125319	-0.00979751		0.573533	-0.0215024	-0.0104755	-0.0224561	-0.0118911	-0.00878237	-0.0149533
0.57395	-0.0215024	0.0012368	-0.00396371	-0.0141114	-0.0106916		0.57395	-0.0211075	-0.0125915	-0.0232309	-0.0129864	-0.00888482	-0.0153892
0.574367	-0.0220612	0.00140071	-0.00482798	-0.0147074	-0.0116676		0.574367	-0.0202879	-0.0146255	-0.0231564	-0.0136122	-0.00752509	-0.015948
0.574783	-0.0224486	0.00128895	-0.00546873	-0.0136867	-0.0119284		0.574783	-0.0190809	-0.0151917	-0.0233278	-0.0139028	-0.00584871	-0.0158362
0.5752	-0.0228509	0.000849366	-0.005126	-0.0116155	-0.0125542		0.5752	-0.0178739	-0.0149682	-0.0235215	-0.0136122	-0.00498258	-0.0154115
0.575617	-0.0235587	6.70552e-05	-0.00399351	-0.00946224	-0.0138208		0.575617	-0.0170171	-0.0149459	-0.0230595	-0.0123754	-0.00530854	-0.0147745
0.576033	-0.0245944	-0.0012368	-0.00335276	-0.00760704	-0.0150651		0.576033	-0.0162572	-0.0149161	-0.0224337	-0.010252	-0.00623986	-0.0145398
0.57645	-0.0255555	-0.0025779	-0.00369549	-0.00642985	-0.0152215		0.57645	-0.0157654	-0.0145584	-0.0224859	-0.00805408	-0.00760891	-0.0145622
0.576867	-0.0263527	-0.00347942	-0.0045225	-0.00645965	-0.0146776		0.576867	-0.0156164	-0.0143945	-0.0230223	-0.00672787	-0.00976026	-0.0146963
0.577283	-0.0267401	-0.0039041	-0.00529736	-0.00738353	-0.0142977		0.577283	-0.0156835	-0.0147969	-0.0220984	-0.00587851	-0.0113621	-0.0159815
0.5777	-0.0260398	-0.00403822	-0.00598282	-0.00831485	-0.0137836		0.5777	-0.0158623	-0.0147223	-0.0201538	-0.00517815	-0.011446	-0.0176579
0.578117	-0.0245646	-0.00400841	-0.00640005	-0.00826269	-0.0127479		0.578117	-0.0160038	-0.0135005	-0.0187531	-0.00501424	-0.00996515	-0.020016
0.578533	-0.0233054	-0.00345707	-0.00595301	-0.00759959	-0.011012		0.578533	-0.016205	-0.0121817	-0.0183508	-0.0057295	-0.00854954	-0.0222735
0.57895	-0.0227094	-0.00266731	-0.00490248	-0.00710785	-0.00949949		0.57895	-0.016585	-0.0117868	-0.0181124	-0.00686199	-0.00800006	-0.024464
0.579367	-0.0220612	-0.00215322	-0.00417233	-0.00687689	-0.0089556		0.579367	-0.0173151	-0.0122488	-0.0175387	-0.00748038	-0.00779517	-0.0269003
0.579783	-0.0214651	-0.00210851	-0.0038892	-0.00683963	-0.00942498		0.579783	-0.0182763	-0.0130758	-0.0180081	-0.00816584	-0.00810251	-0.0287779
0.5802	-0.022009	-0.00208616	-0.00383705	-0.00681728	-0.0101849		0.5802	-0.0193119	-0.0141338	-0.0197366	-0.00928342	-0.00926666	-0.0297949
0.580617	-0.0232533	-0.00128895	-0.00426173	-0.00768155	-0.0108331		0.580617	-0.0201687	-0.015609	-0.021413	-0.0103265	-0.0113156	-0.0294037
0.581033	-0.0240728	-8.9407e-05	-0.00502914	-0.00908226	-0.0114962		0.581033	-0.0210479	-0.0164956	-0.0218451	-0.01055	-0.0128802	-0.0284314
0.58145	-0.0241771	0.000722706	-0.00503659	-0.00990927	-0.0119433		0.58145	-0.0217333	-0.0161529	-0.0215173	-0.0103116	-0.0129547	-0.0273921
0.581867	-0.024572	0.00109523	-0.00368804	-0.00983477	-0.0116453		0.581867	-0.0221655	-0.0149682	-0.0211671	-0.0104904	-0.012042	-0.026498
0.582283	-0.0257716	0.00160932	-0.0019297	-0.00939518	-0.0105575		0.582283	-0.0225157	-0.0136569	-0.0212118	-0.0109598	-0.0109151	-0.025671
0.5827	-0.0270754	0.00233948	-0.000715256	-0.00925362	-0.00975281		0.5827	-0.022836	-0.0133812	-0.0217035	-0.0115037	-0.00919215	-0.0246093
0.583117	-0.0280663	0.00257045	5.21541e-05	-0.00881404	-0.00987202		0.583117	-0.0230446	-0.0141338	-0.0217035	-0.0113025	-0.0064075	-0.0228323
0.583533	-0.0288934	0.00218302	0.000394881	-0.0083819	-0.0105947		0.583533	-0.0223294	-0.0157133	-0.0209212	-0.0105426	-0.0033807	-0.0211336
0.58395	-0.0298172	0.00175089	-0.000245869	-0.00852346	-0.011377		0.58395	-0.0205785	-0.0170618	-0.019826	-0.010021	-0.00190921	-0.0208654
0.584367	-0.0305101	0.00154972	-0.00145286	-0.00977516	-0.0119135		0.584367	-0.0188649	-0.0172853	-0.0199676	-0.0103042	-0.00231899	-0.0217147
0.584783	-0.0304729	0.00138581	-0.00231713	-0.0113472	-0.0118688		0.584783	-0.0179037	-0.0170097	-0.0212416	-0.0111759	-0.00345521	-0.0222512
0.5852	-0.0298992	0.00154227	-0.0025332	-0.0121966	-0.0109226		0.5852	-0.0179783	-0.0165105	-0.0222027	-0.0113919	-0.00490807	-0.0216365
0.585617	-0.0293106	0.00193715	-0.00274926	-0.0123456	-0.0089258		0.585617	-0.0188723	-0.0157729	-0.022836	-0.0114441	-0.00664964	-0.020653
0.586033	-0.0287965	0.00199676	-0.00336766	-0.0117868	-0.00659376		0.586033	-0.0203848	-0.0145063	-0.0232458	-0.0121295	-0.00920147	-0.0195801
0.58645	-0.028424	0.00134855	-0.00373274	-0.0110045	-0.00463426		0.58645	-0.0222549	-0.0137165	-0.0233427	-0.0129119	-0.0116136	-0.0176802
0.586867	-0.0280589	0.000596046	-0.00339747	-0.00987947	-0.00338256		0.586867	-0.0236109	-0.0145808	-0.02224	-0.0128448	-0.0129361	-0.0156686
0.587283	-0.0277758	0.000327826	-0.00329316	-0.00926852	-0.00349432		0.587283	-0.0241548	-0.0162572	-0.0200197	-0.0117123	-0.0136252	-0.0147857
0.5877	-0.0277758	7.45058e-06	-0.00452995	-0.0100657	-0.00505149		0.5877	-0.0234842	-0.0173822	-0.017941	-0.0106692	-0.0141189	-0.0153668
0.588117	-0.0281855	-0.000327826	-0.00618398	-0.0113249	-0.00778586		0.588117	-0.0219643	-0.0174195	-0.0168607	-0.0103414	-0.0150874	-0.0171661
0.588533	-0.0289753	-0.000417233	-0.00647455	-0.0121072	-0.0107735		0.588533	-0.020355	-0.0170171	-0.0170916	-0.0103861	-0.0156648	-0.0195242
0.58895	-0.0294298	-0.000312924	-0.00516325	-0.0117198	-0.013113		0.58895	-0.018999	-0.0162125	-0.0175461	-0.0104234	-0.0159908	-0.0223853
0.589367	-0.029318	-0.000670552	-0.00409782	-0.0105351	-0.0145957		0.589367	-0.0176504	-0.0147745	-0.0172779	-0.0102073	-0.0165869	-0.024341
0.589783	-0.0285879	-0.00114739	-0.00359118	-0.00876933	-0.0149757		0.589783	-0.0162199	-0.013411	-0.016503	-0.00984222	-0.0172015	-0.0245646
0.5902	-0.0272095	-0.000335276	-0.00233948	-0.00652671	-0.0144169		0.5902	-0.0156909	-0.0128821	-0.0160187	-0.00936538	-0.017602	-0.0235364
0.590617	-0.0254586	0.00111014	-0.000230968	-0.00506639	-0.0135675		0.590617	-0.0160262	-0.0131875	-0.0161305	-0.00909716	-0.0169221	-0.022117
0.591033	-0.0234097	0.00204891	0.00127405	-0.00481307	-0.0134036		0.591033	-0.0162721	-0.0135154	-0.0161231	-0.00964105	-0.015283	-0.0212565
0.59145	-0.0215843	0.00223517	0.00090152	-0.00526756	-0.0146404		0.59145	-0.0161678	-0.0137687	-0.0160038	-0.0111312	-0.0126287	-0.0207871
0.591867	-0.0201836	0.00268966	-0.000752509	-0.00545382	-0.0170022		0.591867	-0.0165328	-0.0142008	-0.0165328	-0.0129715	-0.00966713	-0.0210889
0.592283	-0.0194237	0.00336766	-0.00266731	-0.00535697	-0.0191703		0.592283	-0.017345	-0.0149757	-0.0177249	-0.0144169	-0.00754371	-0.0224635
0.5927	-0.0190511	0.00270456	-0.00394136	-0.00568479	-0.0199899		0.5927	-0.0174195	-0.0157952	-0.0185594	-0.0150949	-0.00660308	-0.0248104
0.593117	-0.0182018	0.00118464	-0.00429153	-0.00604242	-0.0189394		0.593117	-0.0171587	-0.0165999	-0.0185221	-0.014849	-0.0069011	-0.027325
0.593533	-0.0170991	0.000327826	-0.00420213	-0.00572205	-0.0162348		0.593533	-0.0178814	-0.0175163	-0.0184029	-0.0137687	-0.00756234	-0.0286996
0.59395	-0.0162944	0.000864267	-0.00393391	-0.00476837	-0.0126809		0.59395	-0.0193492	-0.0186488	-0.0188798	-0.0123978	-0.00850297	-0.0286549
0.594367	-0.0167564	0.00201911	-0.00344962	-0.00476092	-0.00888854		0.594367	-0.0202656	-0.0197887	-0.0194013	-0.0117347	-0.00940636	-0.0267439
0.594783	-0.0182912	0.00284612	-0.00237674	-0.00589341	-0.00589341		0.594783	-0.0204593	-0.0200272	-0.0192299	-0.0124127	-0.00981614	-0.0232793
0.5952	-0.0200346	0.00356138	-0.00150502	-0.00698864	-0.00439584		0.5952	-0.0210181	-0.0194535	-0.0191778	-0.01432	-0.00994652	-0.0195578
0.595617	-0.0213683	0.00400096	-0.00169128	-0.00771135	-0.00480562		0.595617	-0.0214204	-0.0188947	-0.0198707	-0.0164509	-0.00941567	-0.0172108
0.596033	-0.0222474	0.00392646	-0.00249594	-0.00888854	-0.00694394		0.596033	-0.0203401	-0.0193417	-0.0206232	-0.0175163	-0.00897795	-0.0175461
0.59645	-0.0232756	0.00331551	-0.0032112	-0.011228	-0.00953674		0.59645	-0.0182018	-0.0208169	-0.0207052	-0.0167042	-0.00908971	-0.0197701
0.596867	-0.0241175	0.00230968	-0.00370294	-0.0131577	-0.0118017		0.596867	-0.016205	-0.0228286	-0.0202954	-0.0142306	-0.00953674	-0.0233017
0.597283	-0.0241473	0.00116974	-0.00480562	-0.0135601	-0.0135303		0.597283	-0.0150949	-0.0251755	-0.0196397	-0.0114366	-0.00945292	-0.0271238
0.5977	-0.0237152	-0.000409782	-0.00618398	-0.0126287	-0.0145584		0.5977	-0.0147671	-0.0271648	-0.0179708	-0.0089705	-0.0083074	-0.0301749
0.598117	-0.0242069	-0.00232458	-0.00683963	-0.0112429	-0.0143051		0.598117	-0.0152811	-0.0278354	-0.0148416	-0.00753999	-0.00760891	-0.0314824
0.598533	-0.0260994	-0.00435114	-0.00673533	-0.00994652	-0.0127479		0.598533	-0.0167117	-0.0267178	-0.0117123	-0.00747293	-0.00743195	-0.0306107
0.59895	-0.0281781	-0.00585616	-0.00622124	-0.00835955	-0.0108704		0.59895	-0.0184178	-0.024721	-0.00994652	-0.00867248	-0.00710599	-0.0288337
0.599367	-0.0291392	-0.00655651	-0.00519306	-0.00671297	-0.00941008		0.599367	-0.0202209	-0.0225306	-0.00941008	-0.0106394	-0.0069011	-0.0271797
0.599783	-0.029169	-0.00667572	-0.00353903	-0.00495464	-0.00818819		0.599783	-0.0219047	-0.0201836	-0.009574	-0.0116974	-0.00760891	-0.0259839
0.6002	-0.0286028	-0.00663847	-0.00217557	-0.00364333	-0.00746548		0.6002	-0.0229403	-0.0178367	-0.0100508	-0.0117943	-0.00895001	-0.0247657
0.600617	-0.0272244	-0.00647455	-0.00169128	-0.00326335	-0.00780821		0.600617	-0.0234693	-0.0162423	-0.0114366	-0.0114664	-0.00982545	-0.0236258
0.601033	-0.0250563	-0.00555813	-0.0013411	-0.00379235	-0.00884384		0.601033	-0.023976	-0.0161752	-0.0135899	-0.0112355	-0.0102911	-0.0223517
0.60145	-0.0231639	-0.00397861	-0.000715256	-0.00476092	-0.00982732		0.60145	-0.0245571	-0.016585	-0.0155643	-0.0111759	-0.010496	-0.0206865
0.601867	-0.0227913	-0.00240654	-0.000543892	-0.0057593	-0.010334		0.601867	-0.0248253	-0.0169724	-0.0167117	-0.0104532	-0.00988133	-0.0189655
0.602283	-0.0241101	-0.00186265	-0.000953674	-0.00720471	-0.0105649		0.602283	-0.0250116	-0.0178367	-0.0169799	-0.00937283	-0.00847504	-0.0184849
0.6027	-0.0262186	-0.00187755	-0.00102073	-0.00855327	-0.0105277		0.6027	-0.0256896	-0.0195205	-0.0171363	-0.00821054	-0.00755303	-0.0198595
0.603117	-0.0281632	-0.00184774	-0.000678003	-0.00911206	-0.00999123		0.603117	-0.0263453	-0.0205413	-0.0172704	-0.00698119	-0.00726432	-0.0221841
0.603533	-0.029698	-0.00168383	-0.00119209	-0.0083819	-0.00943243		0.603533	-0.0264719	-0.0195056	-0.0172406	-0.0057742	-0.00678934	-0.0248328
0.60395	-0.0307038	-0.00183284	-0.00265241	-0.00713021	-0.00923127		0.60395	-0.0262409	-0.017345	-0.0173226	-0.00474602	-0.00606291	-0.027135
0.604367	-0.0310466	-0.00230223	-0.00353157	-0.00613183	-0.00925362		0.604367	-0.0256449	-0.0151843	-0.0179112	-0.00471622	-0.00608154	-0.0290796
0.604783	-0.0306964	-0.00224262	-0.00303239	-0.00588596	-0.00941753		0.604783	-0.0244081	-0.0129193	-0.0188947	-0.00550598	-0.00756234	-0.0301749
0.6052	-0.0305772	-0.00160932	-0.00200421	-0.00685453	-0.00961125		0.6052	-0.0226796	-0.0104383	-0.0193939	-0.00616908	-0.00958331	-0.0301525
0.605617	-0.0310317	-0.000551343	-0.00142306	-0.00841171	-0.0096336		0.605617	-0.0213608	-0.00911951	-0.0187606	-0.00608712	-0.011567	-0.0288561
0.606033	-0.0310391	2.98023e-05	-0.000923872	-0.00976026	-0.0089407		0.606033	-0.0211373	-0.00976026	-0.0169426	-0.00513345	-0.0135694	-0.0265539
0.60645	-0.0302494	-7.45058e-06	-0.000230968	-0.0104904	-0.00772625		0.60645	-0.0218526	-0.0113174	-0.0144243	-0.00392646	-0.0153668	-0.0244081
0.606867	-0.0291541	-0.00076741	0.00012666	-0.0110567	-0.00672042		0.606867	-0.0231415	-0.0128374	-0.0121295	-0.00280142	-0.016531	-0.022687
0.607283	-0.0279322	-0.00186265	-0.000245869	-0.0117049	-0.00566244		0.607283	-0.0246093	-0.0140592	-0.0106245	-0.00210106	-0.0164006	-0.0214912
0.6077	-0.0259057	-0.00213087	-0.00127405	-0.0118837	-0.00467151		0.6077	-0.0261068	-0.0143945	-0.0102594	-0.00227243	-0.0151526	-0.0208095
0.608117	-0.0235513	-0.00158697	-0.00266731	-0.0111535	-0.00422448		0.608117	-0.027366	-0.0139251	-0.0106767	-0.00323355	-0.013411	-0.0208765
0.608533	-0.0221431	-0.000849366	-0.00454485	-0.00990182	-0.00500679		0.608533	-0.0271946	-0.0131503	-0.0115484	-0.00422448	-0.0121817	-0.0211783
[truncated: 26,068 more rows]

## Sheet: Figure 5-figure supplement 2
Panel A					Panel B					Panel C
[truncated: 26,401 more rows]

[truncated: 4 more sheets: Figure 5-figure supplement 3, Figure 5-figure supplement 4, Figure 6-figure supplement 1, Sheet4]
