# Supplementary figures and images for: A phase transition enhances the catalytic activity of SARM1, an NAD+ glycohydrolase involved in neurodegeneration
Source: eLife journal article supplement (doi:10.7554/elife.66694), 2021-06-29

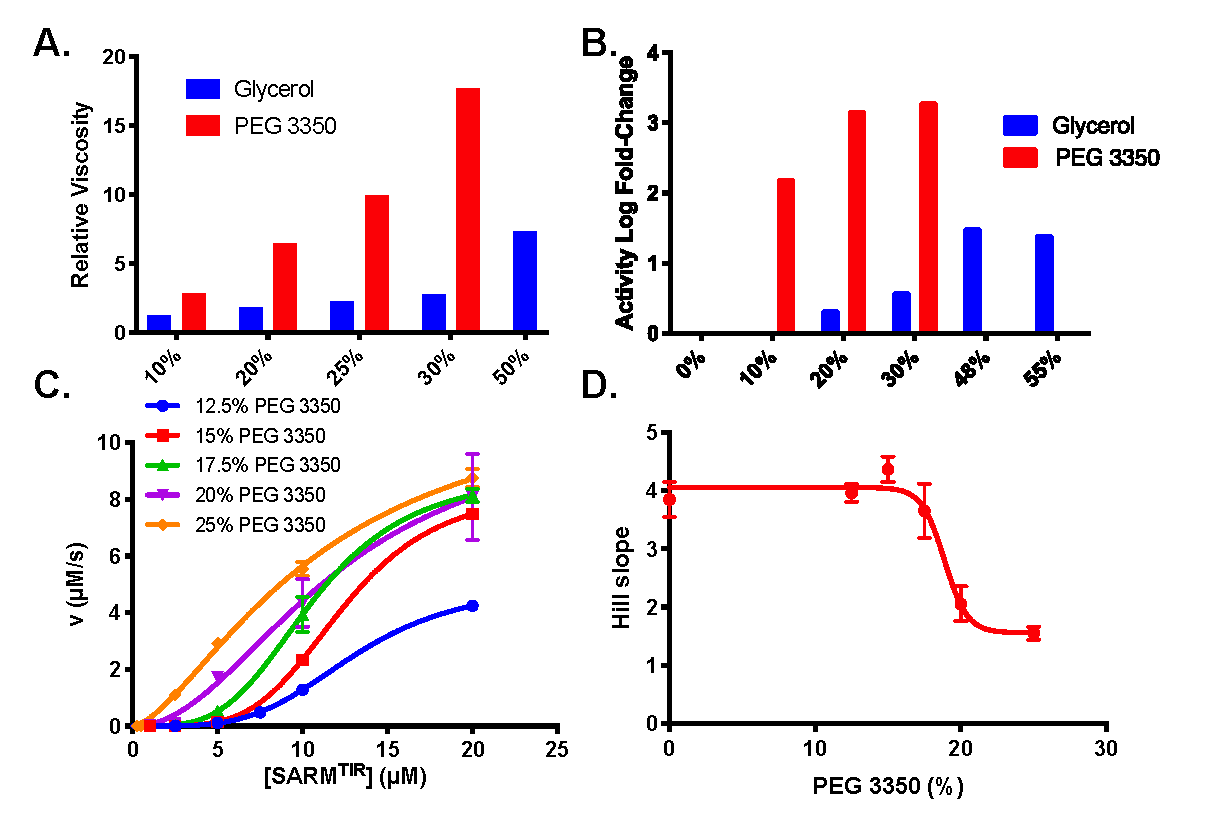

Supplement: supp [file elife-66694-supp-v1.zip › elife_poa_e66694_Figure_2_figure_supplement_1.tif]

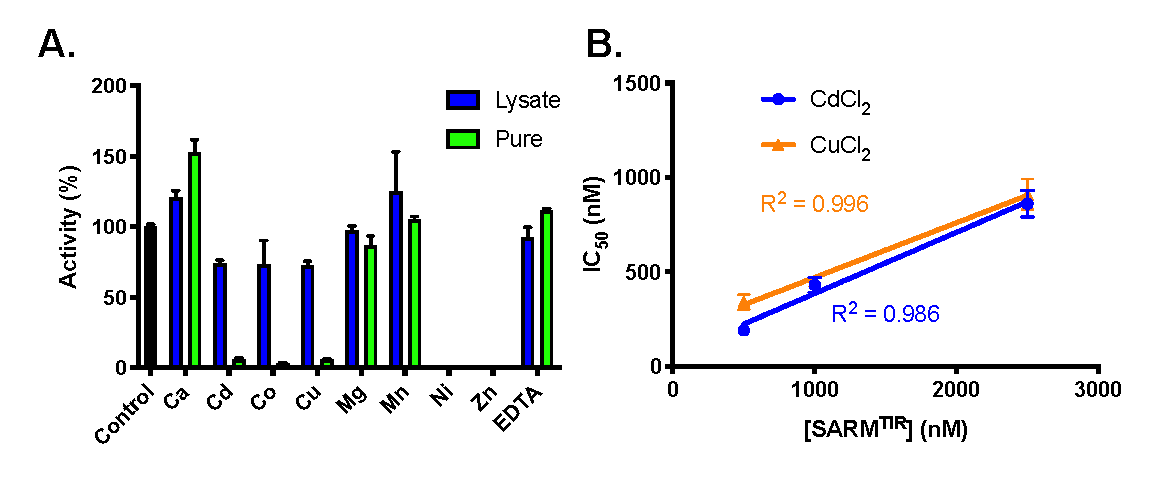

Supplement: supp [file elife-66694-supp-v1.zip › elife_poa_e66694_Figure_2_figure_supplement_2.tif]

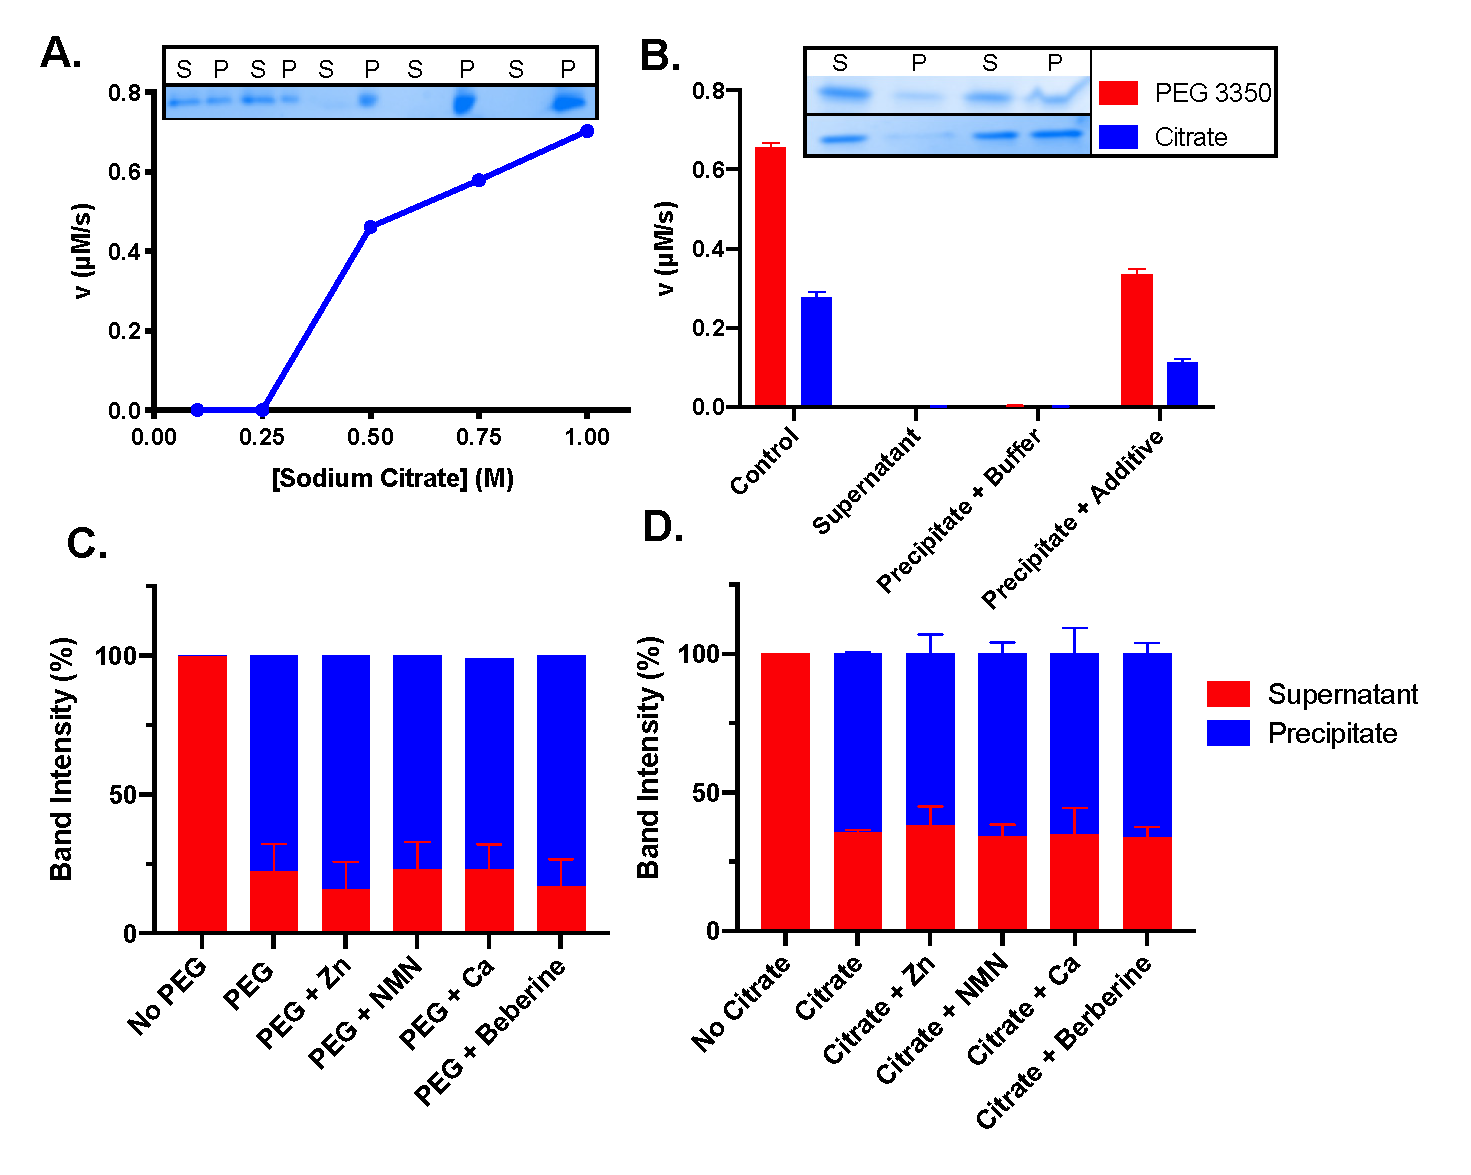

Supplement: supp [file elife-66694-supp-v1.zip › elife_poa_e66694_Figure_3_figure_supplement_1.tif]

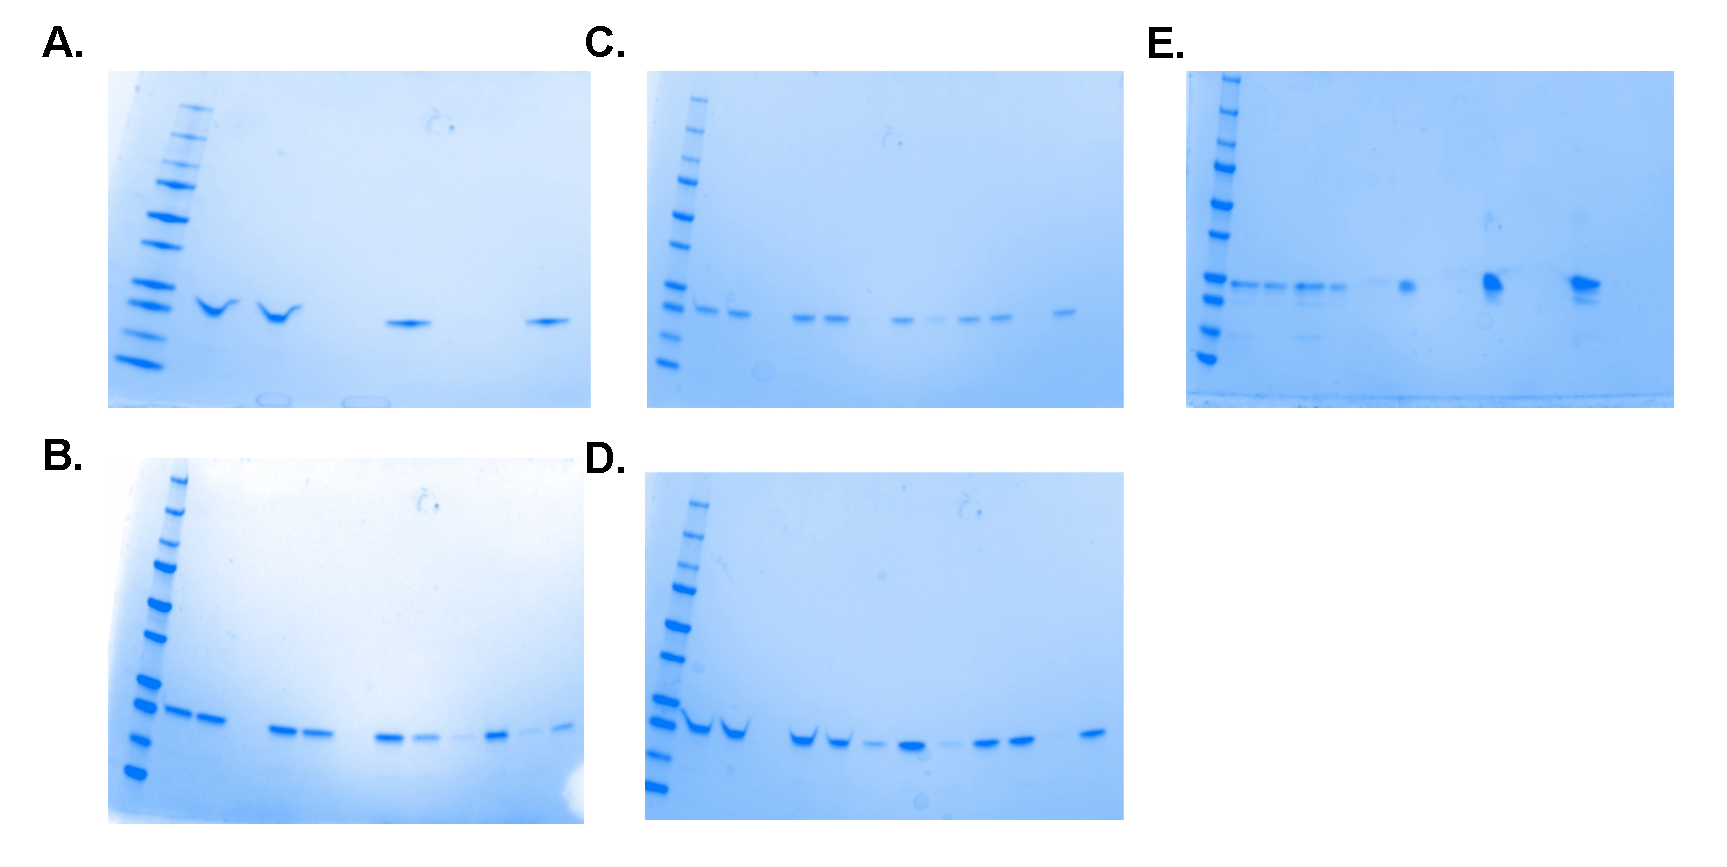

Supplement: supp [file elife-66694-supp-v1.zip › elife_poa_e66694_Figure_3_figure_supplement_2.tif]

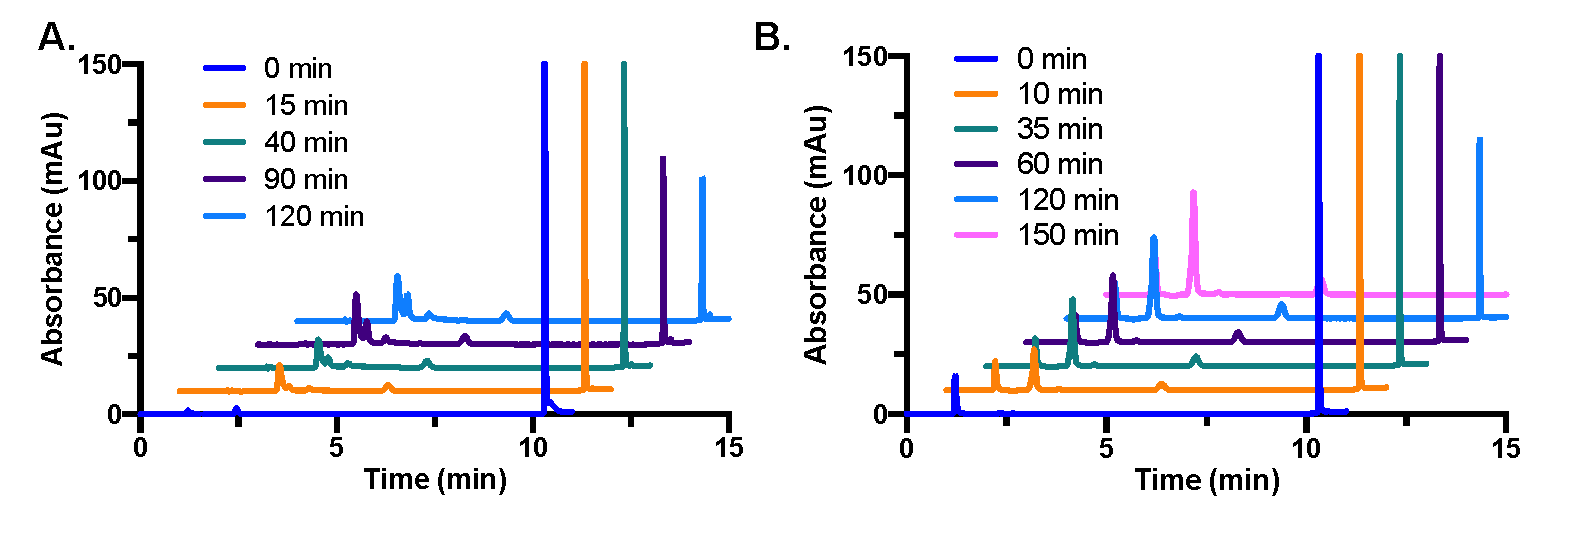

Supplement: supp [file elife-66694-supp-v1.zip › elife_poa_e66694_Figure_5_figure_supplement_1.tif]

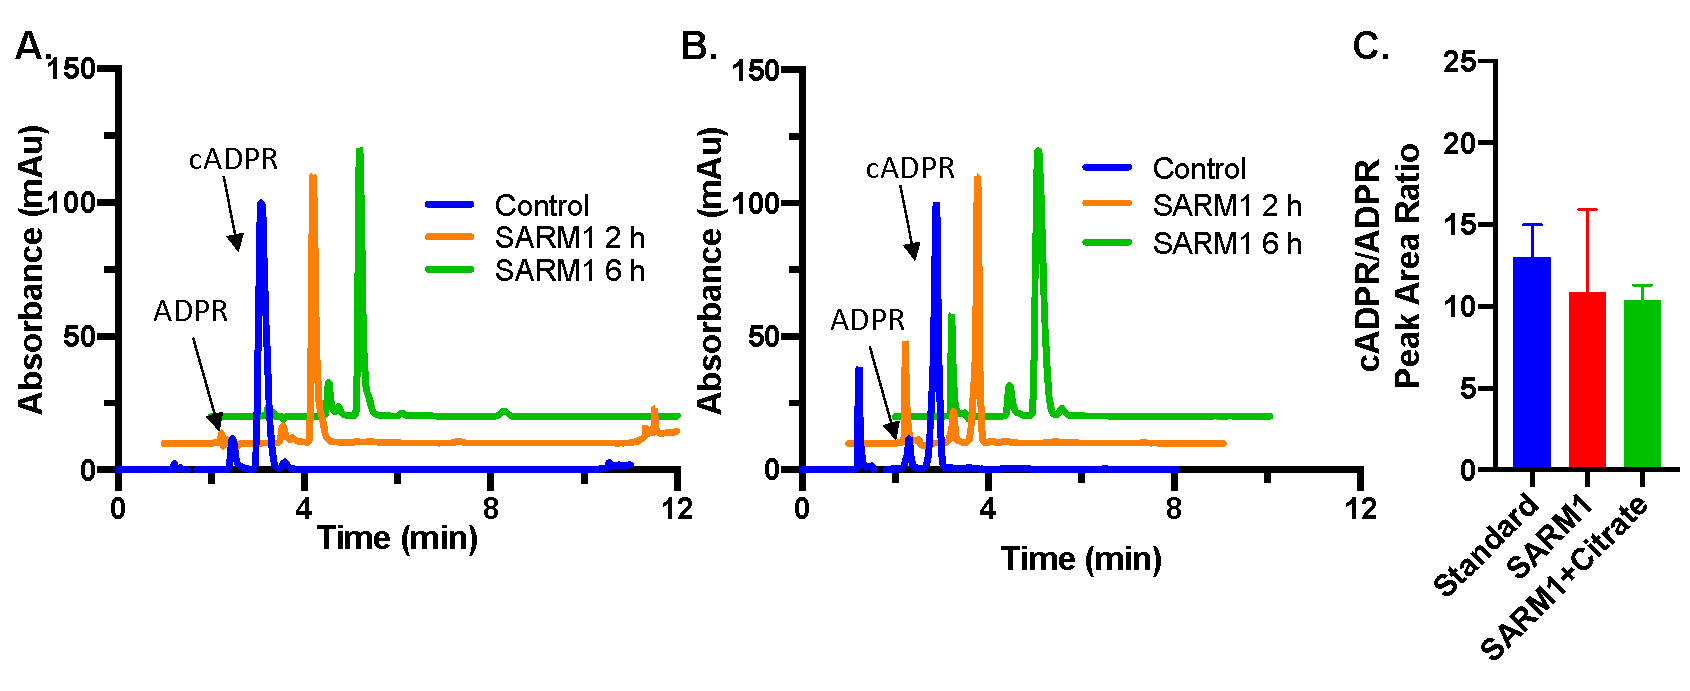

Supplement: supp [file elife-66694-supp-v1.zip › elife_poa_e66694_Figure_5_figure_supplement_2.tif]

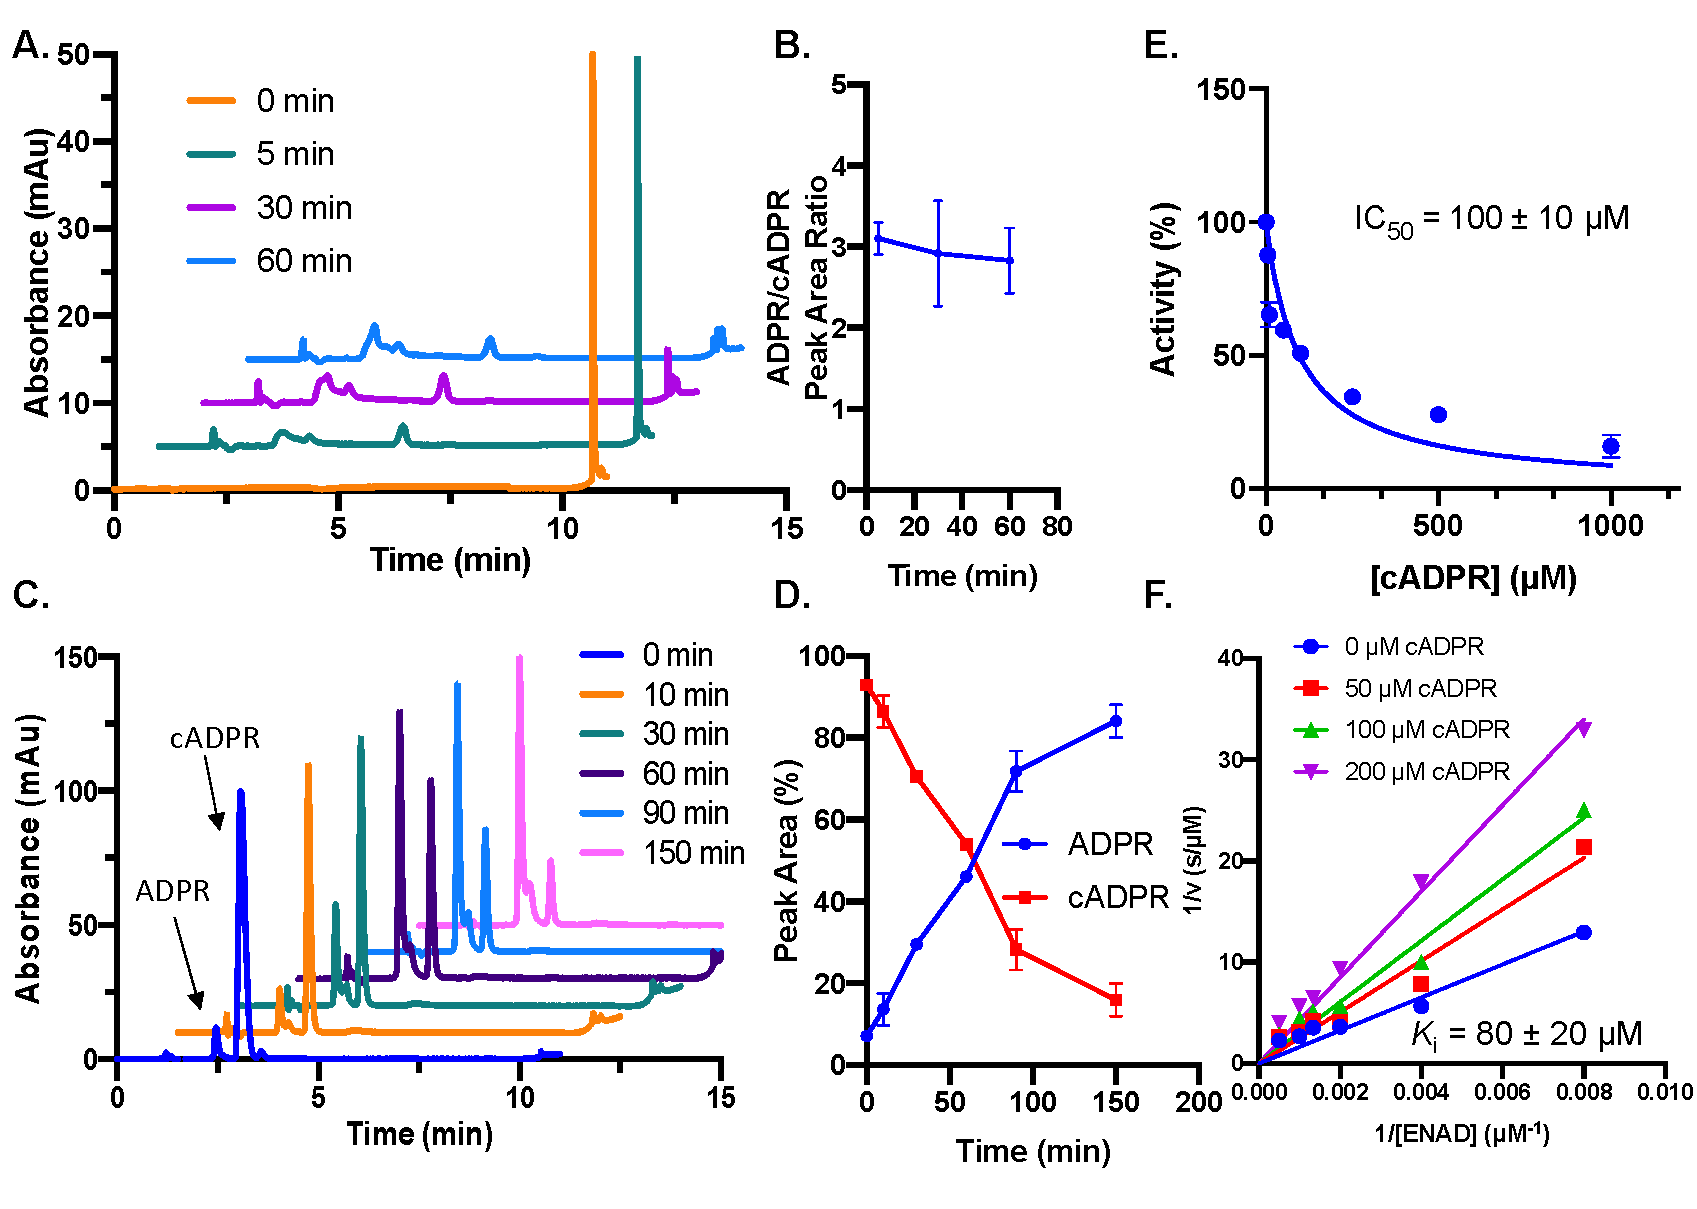

Supplement: supp [file elife-66694-supp-v1.zip › elife_poa_e66694_Figure_5_figure_supplement_3.tif]

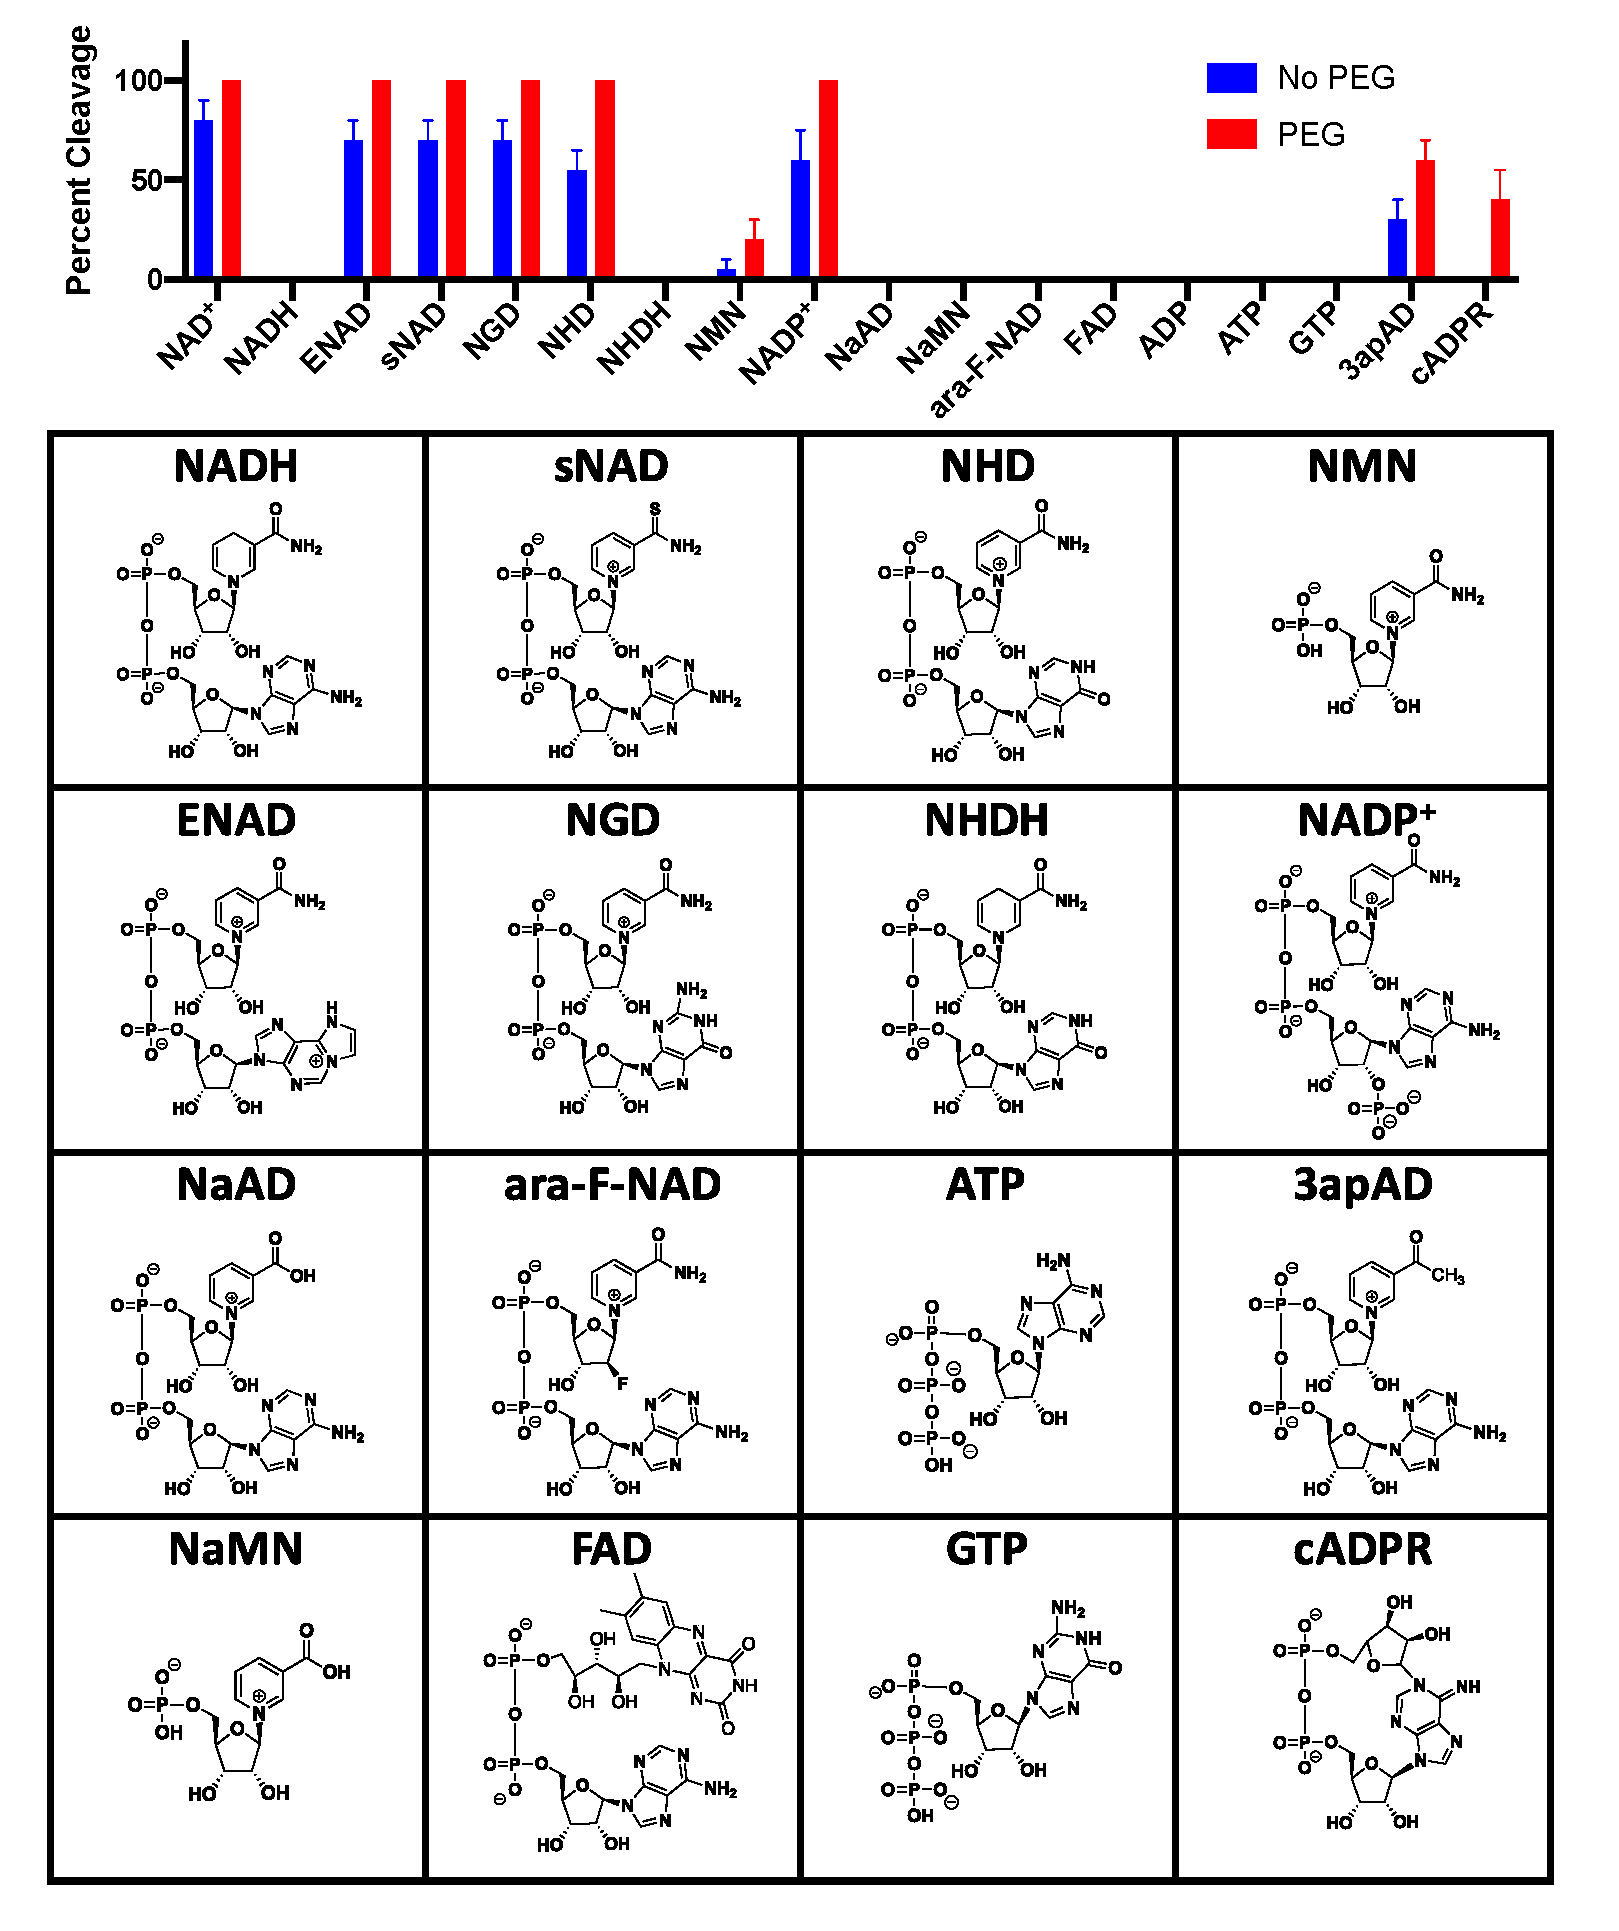

Supplement: supp [file elife-66694-supp-v1.zip › elife_poa_e66694_Figure_5_figure_supplement_4.tif]

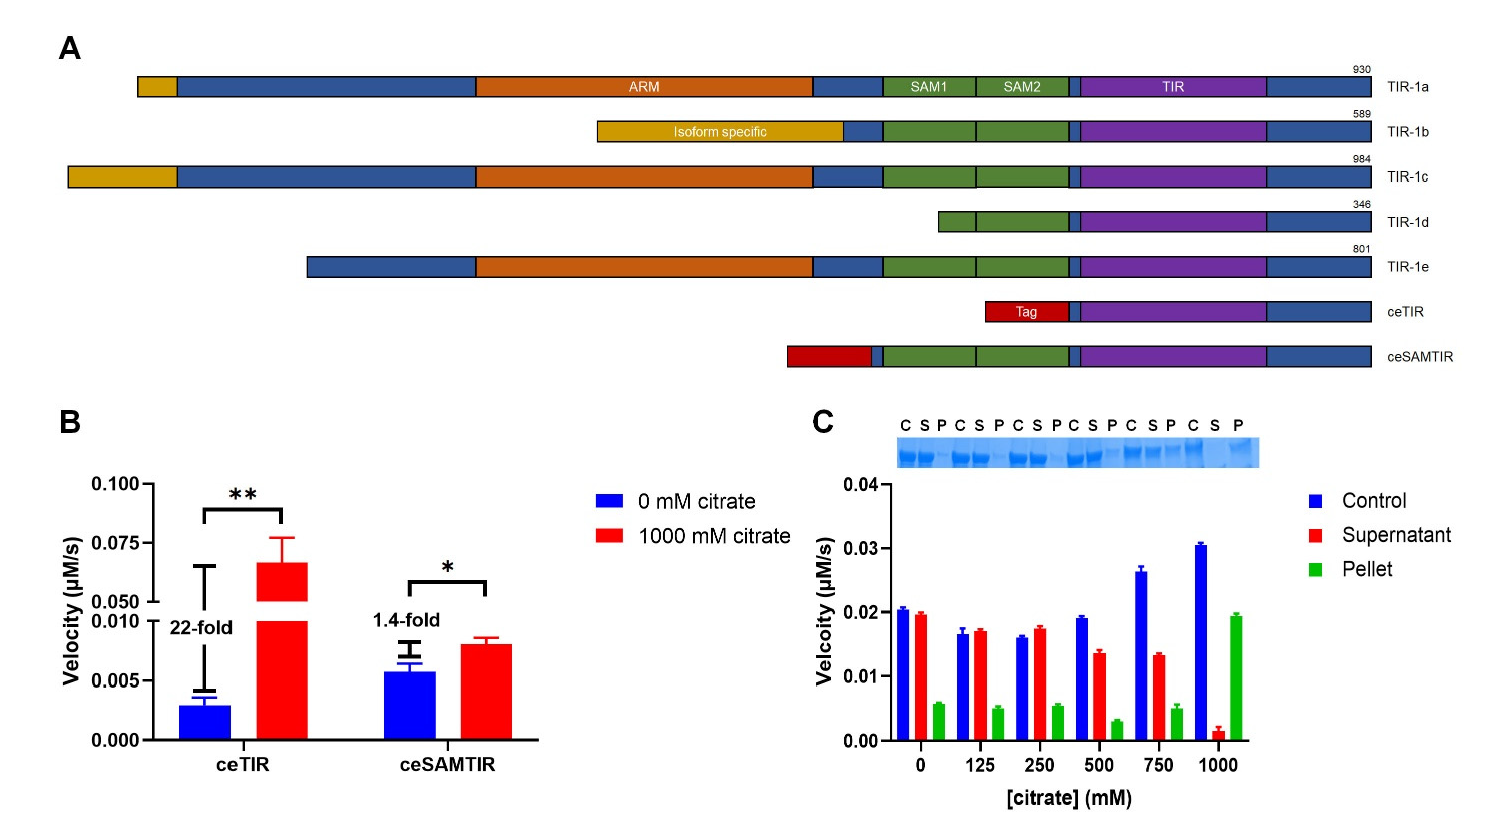

Supplement: supp [file elife-66694-supp-v1.zip › elife_poa_e66694_Figure_6_figure_supplement_1.tif]

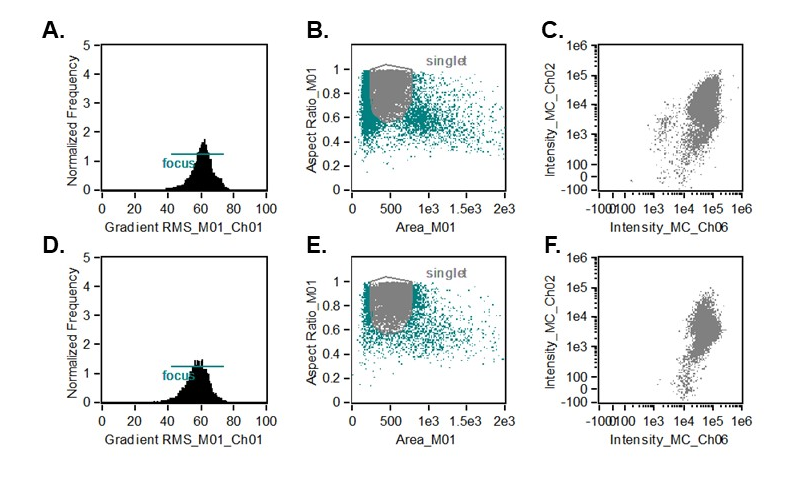

Supplement: supp [file elife-66694-supp-v1.zip › elife_poa_e66694_Figure_6_figure_supplement_2.tif]
